# Supplementary material for: Functionalised phosphonate ester supported lanthanide (Ln = La, Nd, Dy, Er) complexes
Source: Royal Society of Chemistry journal article supplement (doi:10.1039/d0dt03047c), 2020-01-01
Supplement: d0dt03047c1.pdf [file d0dt03047c1.pdf]

## Supporting Information

# Functionalized Phosphonate Ester Supported Lanthanide (Ln = La, Nd, Dy, Er) Complexes.

Ingo Koehne, <sup>a</sup> Artur Lik, <sup>a</sup> Miriam Gerstel, <sup>b</sup> Clemens Bruhn, <sup>c</sup> Johann Peter Reithmaier, <sup>b</sup> Mohamed Benyoucef <sup>b</sup> and Rudolf Pietschnig <sup>a\*</sup>

<sup>a</sup>: Institut für Chemie, Chemische Hybridmaterialien, Universität Kassel, Heinrich-Plett-Str. 40, 34132 Kassel, Germany.

<sup>b</sup>: Institut für Nanostrukturtechnologie und Analytik (INA), Universität Kassel, Heinrich-Plett-Str. 40, 34132 Kassel, Germany.

<sup>c</sup>: Institut für Chemie, Metallorganische Chemie, Universität Kassel, Heinrich-Plett-Str. 40, 34132 Kassel, Germany.

\*Email: pietschnig@uni-kassel.de

## Contents

|       |                                                                                       |    |
|-------|---------------------------------------------------------------------------------------|----|
| 1     | Experimental .....                                                                    | 2  |
| 1.1   | Phosphonate Ligands L1-L6 & NMR Spectra:.....                                         | 3  |
| 1.1.1 | diisopropyl benzylphosphonate (L1) & diisopropyl 4-bromo-benzylphosphonate (L2) ..... | 3  |
| 1.1.2 | diisopropyl ((10-bromoanthracen-9-yl)methyl)phosphonate (L3).....                     | 4  |
| 1.1.3 | diisopropyl 4-(bromomethyl)benzylphosphonate (L4).....                                | 7  |
| 1.1.4 | diisopropyl ((4'-bromo-[1,1'-biphenyl]-4-yl)methyl) phosphonate (L5).....             | 8  |
| 1.1.5 | diisopropyl 4-bromo-2,3,5,6-tetrafluorobenzylphosphonate (L6) .....                   | 13 |
| 1.2   | Lanthanide Complexes [1-32] of L1-L6 & NMR Spectra .....                              | 20 |
| 1.2.1 | L1, X = NO <sub>3</sub> .....                                                         | 20 |
| 1.2.2 | L1, X = Cl .....                                                                      | 20 |
| 1.2.3 | L2, X = NO <sub>3</sub> .....                                                         | 21 |
| 1.2.4 | L2, X = Cl .....                                                                      | 21 |
| 1.2.5 | L3, X = Cl .....                                                                      | 22 |
| 1.2.6 | L4, X = Cl .....                                                                      | 22 |
| 1.2.7 | L5, X = Cl .....                                                                      | 23 |
| 1.2.8 | L6, X = Cl .....                                                                      | 24 |
| 2     | Crystallographic Data.....                                                            | 34 |
| 2.1   | L3 .....                                                                              | 36 |
| 2.2   | L6 .....                                                                              | 39 |

|      |                                 |     |
|------|---------------------------------|-----|
| 2.3  | <i>Complex 2</i> .....          | 42  |
| 2.4  | <i>Complex 3</i> .....          | 52  |
| 2.5  | <i>Complex 5</i> .....          | 58  |
| 2.6  | <i>Complex 10</i> .....         | 62  |
| 2.7  | <i>Complex 13</i> .....         | 71  |
| 2.8  | <i>Complex 14</i> .....         | 76  |
| 2.9  | <i>Complex 17</i> .....         | 81  |
| 2.10 | <i>Complex 18</i> .....         | 87  |
| 2.11 | <i>Complex 19</i> .....         | 92  |
| 2.12 | <i>Complex 20</i> .....         | 97  |
| 2.13 | <i>Complex 31</i> .....         | 103 |
| 2.14 | <i>Complex 32</i> .....         | 108 |
| 3    | <i>Photoluminescence</i> .....  | 114 |
| 3.1  | <i>Absorption Spectra</i> ..... | 114 |
| 3.2  | <i>Emission Spectra</i> .....   | 117 |
| 4    | <i>References</i> .....         | 118 |

## **1** *EXPERIMENTAL*

All manipulations involving air- and moisture sensitive compounds were carried out under an argon atmosphere using Schlenk techniques or handled in an argon glovebox. Solvents were dried over Na or K metal or Na/K alloy and freshly distilled. Starting materials were purchased commercially and were used as received, unless stated otherwise. Filtering of moisture sensitive compounds was carried out with self-made filter-cannulas assembled from Whatman fiberglass filters (GF/B, 25 mm), which were applied with Teflon<sup>®</sup> tape to Teflon<sup>®</sup> cannulas. Flash chromatography was performed with an Interchim PuriFlash XS 520Plus device using PF-30SIHP-F0020 or -F0040 columns. CV = column volumes. For TLC analyses, pre-coated Macherey–Nagel Alugram Xtra SIL G/UV<sub>254</sub> plates were used and the compounds were visualized by UV light. NMR experiments were performed with Varian 400 or 500 MHz spectrometers. <sup>1</sup>H and <sup>13</sup>C-NMR spectra are referenced relative to TMS using the residual solvent signals as internal standards.<sup>1</sup> IR spectra were recorded with a diamond probe Bruker ATR IR spectrometer. Excitation and emission spectra as well as luminescent quantum yield (absolute method) measurements for the range of 300–850 nm were acquired with a Hamamatsu C11347 device. Elementary analyses were performed using a HEKAtech Euro EA 3000 Elementary analyzer. For analyses, samples were prepared in tin cups with V<sub>2</sub>O<sub>5</sub> as an additive to ensure complete combustion. ESI and APCI mass spectra were recorded on a Finnigan LCQ Deca (ThermoQuest) device.

## 1.1 Phosphonate Ligands L1-L6 & NMR Spectra:

### 1.1.1 diisopropyl benzylphosphonate (L1) & diisopropyl 4-bromobenzylphosphonate (L2)

Freshly distilled (bromomethyl)benzene (4.75 mL, 40.0 mmol, 1.00 eq.) or 1-bromo-4-(bromomethyl)benzene (10.0 g, 40.0 mmol, 1.00 eq.) were mixed with P(O<sup>i</sup>Pr)<sub>3</sub> (10.4 mL, 42.0 mmol, 1.05 eq.) in a 50 mL round-bottom flask. The flask was attached to a distillation bridge with Vigreux column and the mixture was heated at 165 °C for 2,5 h while forming <sup>i</sup>PrBr was distilled off. The reaction mixture was cooled to r.t. and residual <sup>i</sup>PrBr and minor side products were removed in vacuo, first at r.t. then at 100 °C. Both compounds were obtained as colorless oils. **L1**: 9.26 g, 36.2 mmol, 90%. **L2**: 13,2 g, 39.5 mmol, 99%. **L1**: <sup>1</sup>H-NMR (400 MHz, CD<sub>2</sub>Cl<sub>2</sub>): δ = 7.32–7.22 (m, 5H, H2–H6), 4.61–4.52 (m, 2H, CH(CH<sub>3</sub>)<sub>2</sub>), 3.08 (d, 2H, <sup>2</sup>J<sub>PH</sub> = 21.6 Hz, CH<sub>2</sub>), 1.27 (d, 6H, <sup>3</sup>J<sub>HH</sub> = 6.2 Hz, CH(CH<sub>3</sub>)<sub>2</sub>), 1.17 (d, 6H, <sup>3</sup>J<sub>HH</sub> = 6.2 Hz, CH(CH<sub>3</sub>)<sub>2</sub>) ppm; <sup>31</sup>P{<sup>1</sup>H}-NMR (202 MHz, CDCl<sub>3</sub>): δ = 24.3 (s) ppm; IR (ATR): 1246 (P=O), 1106 (P–O<sup>i</sup>Pr) cm<sup>-1</sup>. **L2**: <sup>1</sup>H-NMR (400 MHz, CDCl<sub>3</sub>): δ = 7.43 (d, 2H, <sup>3</sup>J<sub>HH</sub> = 8.1 Hz, H3 + H5), 7.18–7.16 (m, 2H, H2 + H6), 4.65–4.56 (m, 2H, CH(CH<sub>3</sub>)<sub>2</sub>), 3.05 (d, 2H, <sup>2</sup>J<sub>PH</sub> = 21.7 Hz, CH<sub>2</sub>), 1.29 (d, 6H, <sup>3</sup>J<sub>HH</sub> = 6.2 Hz, CH(CH<sub>3</sub>)<sub>2</sub>), 1.19 (d, 6H, <sup>3</sup>J<sub>HH</sub> = 6.2 Hz, CH(CH<sub>3</sub>)<sub>2</sub>); <sup>31</sup>P{<sup>1</sup>H}-NMR (202 MHz, CDCl<sub>3</sub>): δ = 23.6 (s) ppm; IR (ATR): 1244 (P=O), 1106 (P–O<sup>i</sup>Pr) cm<sup>-1</sup>.

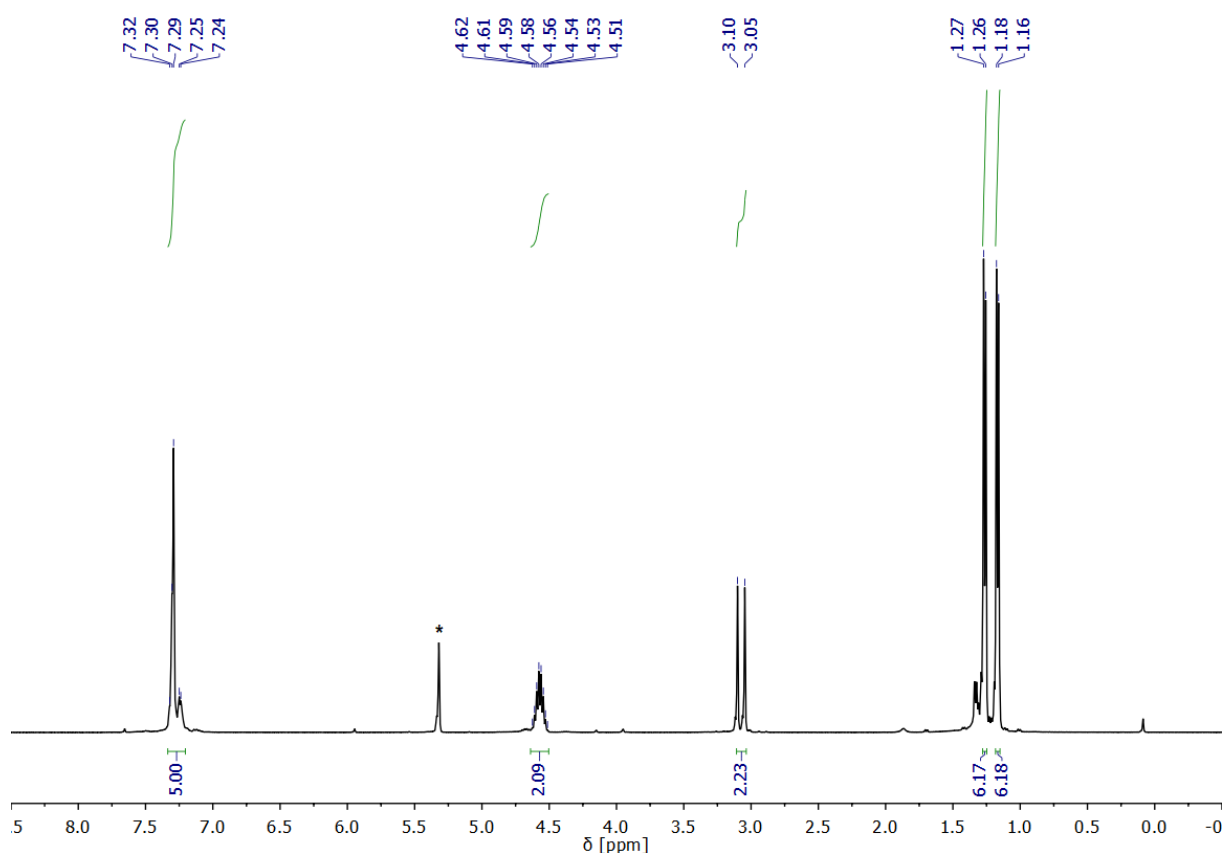

Figure 1: <sup>1</sup>H-NMR spectrum of L1 in CD<sub>2</sub>Cl<sub>2</sub> (\*).

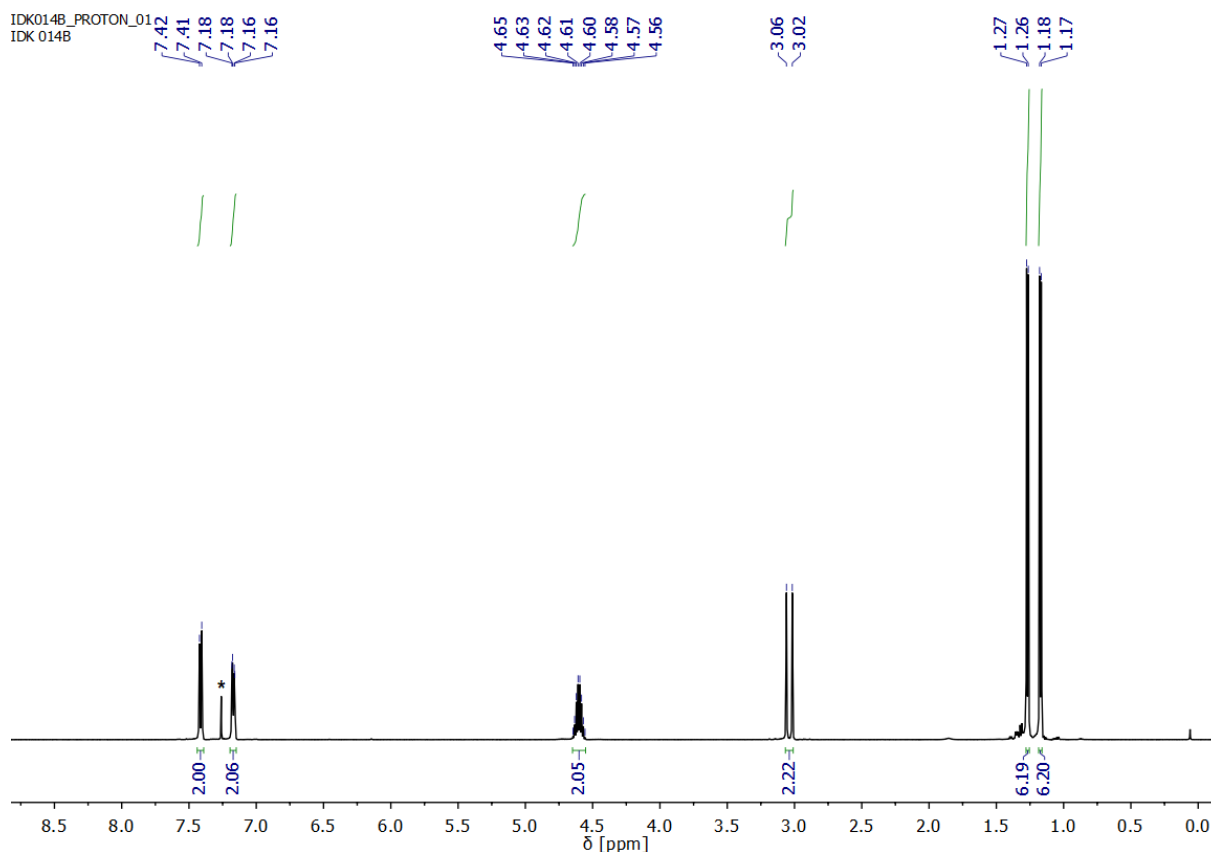

Figure 2:  $^1\text{H-NMR}$  spectrum of **L2** in  $\text{CDCl}_3$  (\*).

### 1.1.2 *diisopropyl ((10-bromoanthracen-9-yl)methyl)phosphonate (L3)*

The starting material **S1** was prepared according to a modified procedure by S. E. Webber et al.<sup>2</sup>:

Triphenylphosphane (12.6 g, 48.0 mmol, 1.00 eq.) was dissolved under slight heating in dry MeCN (120 mL) in a 250 mL Schlenk flask capped with a rubber-septum. The solution was bubbled with argon under stirring for 15 min.. The mixture was cooled with an r.t. water-bath and  $\text{Br}_2$  (7.62 mL, 149 mmol, 3.1 eq.) was slowly added via syringe, forming an orange solution. After cooling to r.t., 9-methanolanthracene (10.0 g, 48.0 mmol, 1.00 eq.) was slowly spatula wise added under a steady stream of argon via the open neck over a period of ca. 10 min. The neck was recapped, and the obtained suspension was vigorously stirred at r.t. for 18 h. The suspension was cooled to  $0^\circ\text{C}$ , filtered, the dark yellow filter cake was washed with  $-20^\circ\text{C}$  MeCN (3 x 10 mL) and the obtained solid was air-dried. **S1** was obtained as a yellow powder (14.7 g, 42.0 mmol, 88%).  $^1\text{H-NMR}$  (400 MHz,  $\text{CDCl}_3$ ):  $\delta$  = 8.65–8.62 (m, 2H, H4 + H8), 8.32 (d, 2H,  $^2J_{\text{HH}} = 8.4$  Hz, H1 + H5), 7.70–7.61 (m, 4H, H2 + H6, H3 + H7), 5.51 (s, 2H,  $\text{CH}_2$ ) ppm.

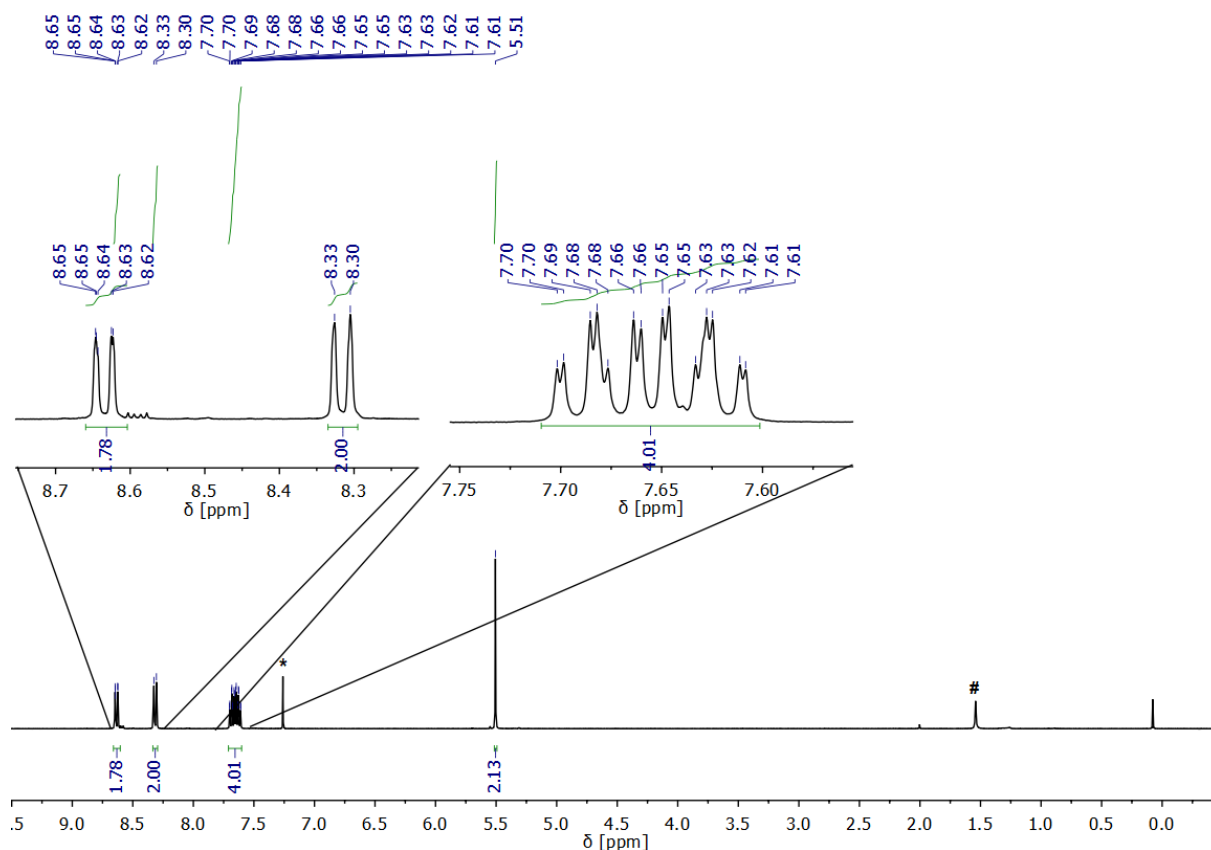

Figure 3:  $^1\text{H-NMR}$  spectrum of **S1** in  $\text{CDCl}_3$  (\*).  $\text{H}_2\text{O}$  (#) from deuterated solvent.

9-bromo-10-(bromomethyl)anthracene (**S1**) (10.5 g, 30.0 mmol, 1.00 eq.) and  $\text{P}(\text{O}^i\text{Pr})_3$  (7.77 mL, 31.5 mmol, 1.05 eq.) were mixed in a 50 mL round-bottom flask under stirring. The flask was attached to a distillation bridge with Vigreux column and the mixture was heated at  $165\text{ }^\circ\text{C}$  for 2.5 h. At  $115\text{--}120\text{ }^\circ\text{C}$  oil bath, the anthracene starting material melted completely and forming  $^i\text{PrBr}$  started to distill off. The brownish-orange solution was cooled to r.t. and solidified. The solid material was ground in a mortar to obtain a yellow powder which was subsequently washed with  $-20\text{ }^\circ\text{C}$  pentanes (3 x 50 mL), filtered (frit, P3) and dried. **L3** was obtained as a yellow powder (11.9 g, 27.3 mmol, 91%). Crystals suitable for SCXRD experiments were obtained from vapor diffusion of pentanes into a saturated solution of **L3** in THF at  $-20\text{ }^\circ\text{C}$ .  $^1\text{H-NMR}$  (400 MHz,  $\text{CDCl}_3$ ):  $\delta = 8.67\text{--}8.50$  (m, 2H, H4 + H8),  $8.45\text{--}8.32$  (m, 2H, H1 + H5),  $7.61\text{--}7.56$  (m, 4H, H2 + H6, H3 + H7),  $4.57\text{--}4.48$  (m, 2H,  $\text{CH}(\text{CH}_3)_2$ ),  $4.14$  (d, 2H,  $^2J_{\text{PH}} = 22.6\text{ Hz}$ ,  $\text{CH}_2$ ),  $1.23$  (d, 6H,  $^3J_{\text{HH}} = 6.2\text{ Hz}$ ,  $\text{CH}(\text{CH}_3)_2$ ),  $0.90$  (d, 6H,  $^3J_{\text{HH}} = 6.2\text{ Hz}$ ,  $\text{CH}(\text{CH}_3)_2$ ) ppm;  $^{13}\text{C}\{^1\text{H}\}\text{-NMR}$  (100 MHz,  $\text{CDCl}_3$ ):  $\delta = 131.3$  (d, 2C,  $^4J_{\text{PC}} = 6.8\text{ Hz}$ , C13 + C14),  $130.5$  (d, 1C,  $^5J_{\text{PC}} = 4.5\text{ Hz}$ , C10),  $128.6$  (d, 2C,  $^6J_{\text{PC}} = 1.7\text{ Hz}$ , C3 + C7),  $126.9$  (d, 2C,  $^5J_{\text{PC}} = 1.9\text{ Hz}$ , C4 + C8),  $126.2\text{--}126.0$  (m, 4C, C1 + C5, C2 + C6),  $125.5$  (d, 1C,  $^2J_{\text{PC}} = 11.3\text{ Hz}$ , C9),  $123.5$  (d, 2C,  $^3J_{\text{PC}} = 7.9\text{ Hz}$ , C11 + C12),  $71.1$  (d, 2C,  $^2J_{\text{PC}} = 7.2\text{ Hz}$ ,  $\text{CH}(\text{CH}_3)_2$ ),  $28.6$  (d, 1C,  $^1J_{\text{PC}} = 142.1\text{ Hz}$ ,  $\text{CH}_2$ ),  $24.3$  (d, 2C,  $^3J_{\text{PC}} = 3.6\text{ Hz}$ ,  $\text{CH}(\text{CH}_3)_2$ ),  $23.8$  (d, 2C,  $^3J_{\text{PC}} = 5.3\text{ Hz}$ ,  $\text{CH}(\text{CH}_3)_2$ ) ppm;  $^{31}\text{P}\{^1\text{H}\}\text{-NMR}$  (202 MHz,  $\text{CDCl}_3$ ):  $\delta = 23.0$  (s) ppm; IR (ATR)  $\tilde{\nu} = 1246$  (P=O),  $1104$  (P-O $^i\text{Pr}$ )  $\text{cm}^{-1}$ ; MS (ESI+)  $m/z$  (%):  $457.06$  (100) [M + Na $^+$ ] $^+$ ,  $893.13$  (95) [2M + Na $^+$ ] $^+$ ; Elemental analysis in % (calculated)  $\text{C}_{21}\text{H}_{24}\text{BrO}_3\text{P}$  (435.29 g/mol): C 57.90 (57.94), H 5.55 (5.56).

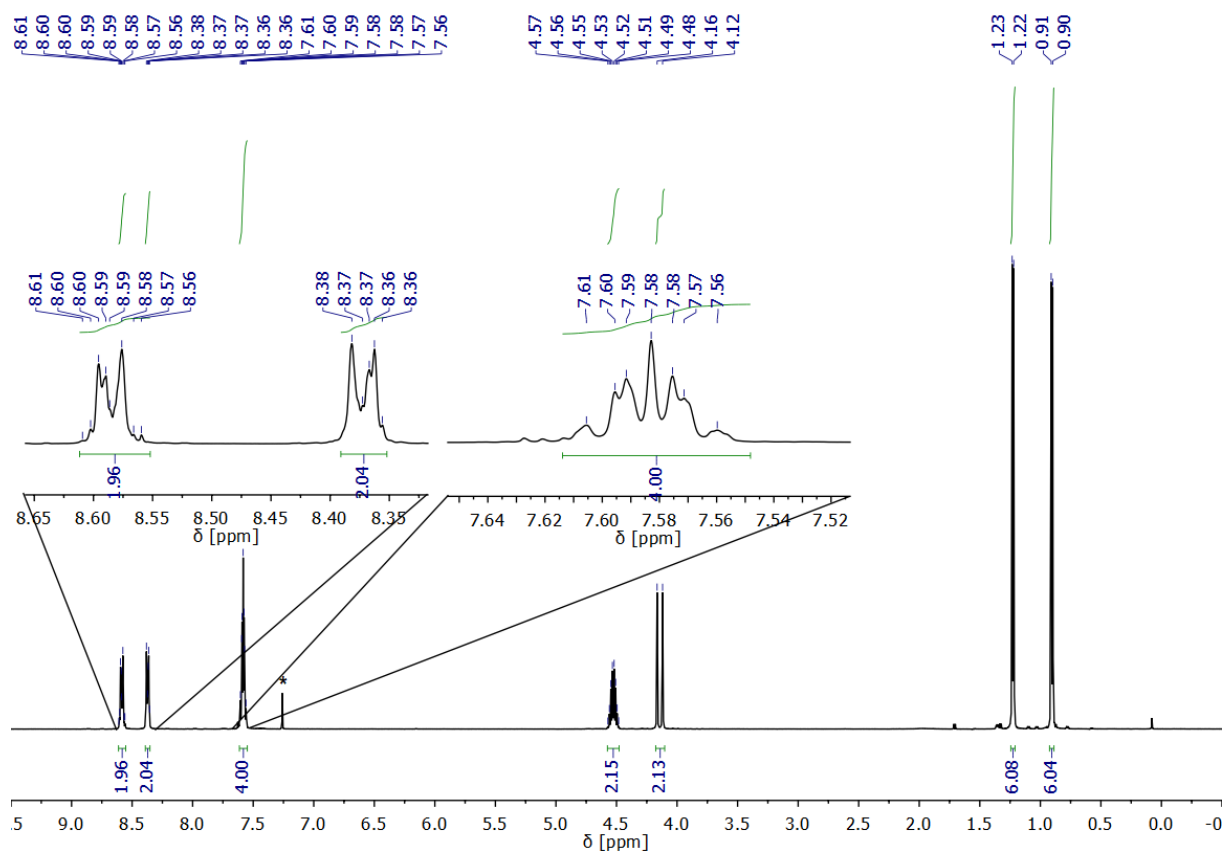

Figure 4:  $^1\text{H-NMR}$  spectrum of **L3** in  $\text{CDCl}_3$  (\*).

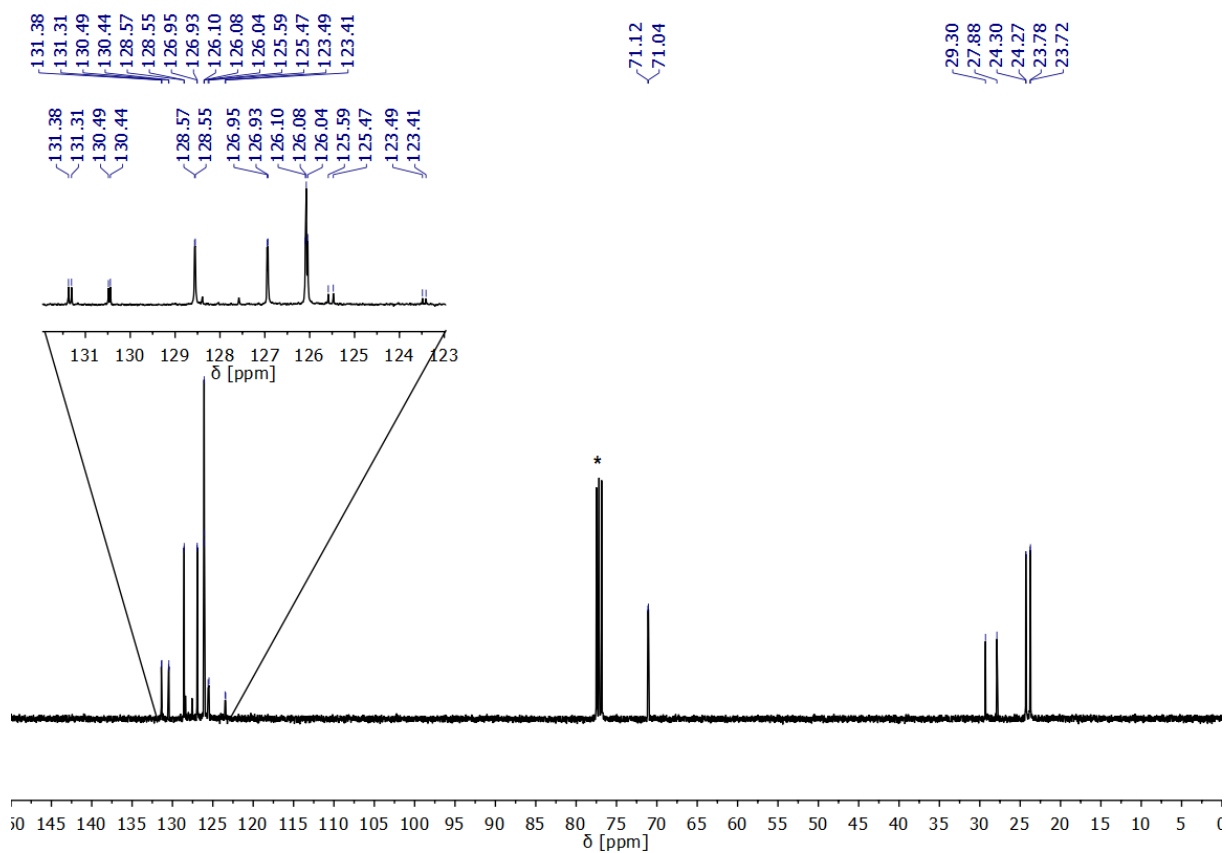

Figure 5:  $^{13}\text{C-NMR}$  spectrum of **L3** in  $\text{CDCl}_3$  (\*).

### 1.1.3 diisopropyl 4-(bromomethyl)benzylphosphonate (**L4**)

The synthesis was performed following a modified procedure by D. Villemin et al.<sup>3</sup>:

In a 50 mL Schlenk flask, 1,4-bis(bromomethyl)benzene (10.0 g, 37.9 mmol, 3.00 eq.) was suspended in dry toluene (35.0 mL) and P(O<sup>i</sup>Pr)<sub>3</sub> (3.12 mL, 12.6 mmol, 1.00 eq.) was added via syringe. The flask was attached under Ar to a reflux condenser and the mixture was heated for 20 h. The mixture was cooled to r.t., the solvent was removed under reduced pressure and the residue was mixed with -20 °C MeOH (25 mL) to precipitate the excess starting material. The suspension was filtered, and the filter cake was washed with -20 °C MeOH (15 mL). The solvent from the filtrate was reduced to a minimum and the solution was stored at -20 °C to precipitate residual starting material and some of the di-phosphorylated side product. The precipitate was separated as described above, the solvent from the filtrate was removed and the crude product was purified by fractional distillation (no Vigreux-column, 2 x 10<sup>-2</sup> mbar, 170 °C oil bath). **L4** was obtained as a colorless oil which becomes pale yellow over time (5.93 g, 17.0 mmol, 58%). <sup>1</sup>H-NMR (400 MHz, CDCl<sub>3</sub>): δ = 7.40–7.33 (m, 2H, H3 + H5), 7.32–7.28 (m, 2H, H2 + H6), 4.73–4.55 (m, 2H, CH(CH<sub>3</sub>)<sub>2</sub>), 4.50 (s, 2H, CH<sub>2</sub>-Br), 3.12 (d, 2H, <sup>2</sup>J<sub>PH</sub> = 21.8 Hz, CH<sub>2</sub>-P), 1.30 (d, 6H, <sup>3</sup>J<sub>HH</sub> = 6.2 Hz, CH(CH<sub>3</sub>)<sub>2</sub>), 1.19 (d, 6H, <sup>3</sup>J<sub>HH</sub> = 6.2 Hz, CH(CH<sub>3</sub>)<sub>2</sub>) ppm; <sup>13</sup>C{<sup>1</sup>H}-NMR (100 MHz, CDCl<sub>3</sub>): δ = 136.4 (d, 1C, <sup>5</sup>J<sub>PC</sub> = 3.8 Hz, C4), 132.6 (d, 1C, <sup>2</sup>J<sub>PC</sub> = 9.2 Hz, C1), 130.4 (d, 2C, <sup>3</sup>J<sub>PC</sub> = 6.6 Hz, C2 + C6), 129.2 (d, 2C, <sup>4</sup>J<sub>PC</sub> = 3.1 Hz, C3 + C5), 70.8 (d, 1C, <sup>2</sup>J<sub>PC</sub> = 7.0 Hz, CH(CH<sub>3</sub>)<sub>2</sub>), 34.7 (d, 1C, <sup>1</sup>J<sub>PC</sub> = 139.6 Hz, CH<sub>2</sub>-P), 33.4 (d, 1C, <sup>6</sup>J<sub>PC</sub> = 0.7 Hz, CH<sub>2</sub>-Br), 24.2 (d, 2C, <sup>3</sup>J<sub>PC</sub> = 3.8 Hz, CH(CH<sub>3</sub>)<sub>2</sub>), 23.9 (d, 2C, <sup>3</sup>J<sub>PC</sub> = 5.1 Hz, CH(CH<sub>3</sub>)<sub>2</sub>) ppm; <sup>31</sup>P{<sup>1</sup>H}-NMR (202 MHz, CDCl<sub>3</sub>): δ = 24.0 (s) ppm; IR (ATR)  $\tilde{\nu}$  = 1243 (P=O), 1105 (P-O<sup>i</sup>Pr) cm<sup>-1</sup>; MS (ESI+) *m/z* (%): 371.04 (100) [M + Na<sup>+</sup>]<sup>+</sup>; Elemental analysis in % (calculated) C<sub>14</sub>H<sub>22</sub>BrO<sub>3</sub>P (349.20 g/mol): C 48.20 (48.15), H 6.48 (6.35).

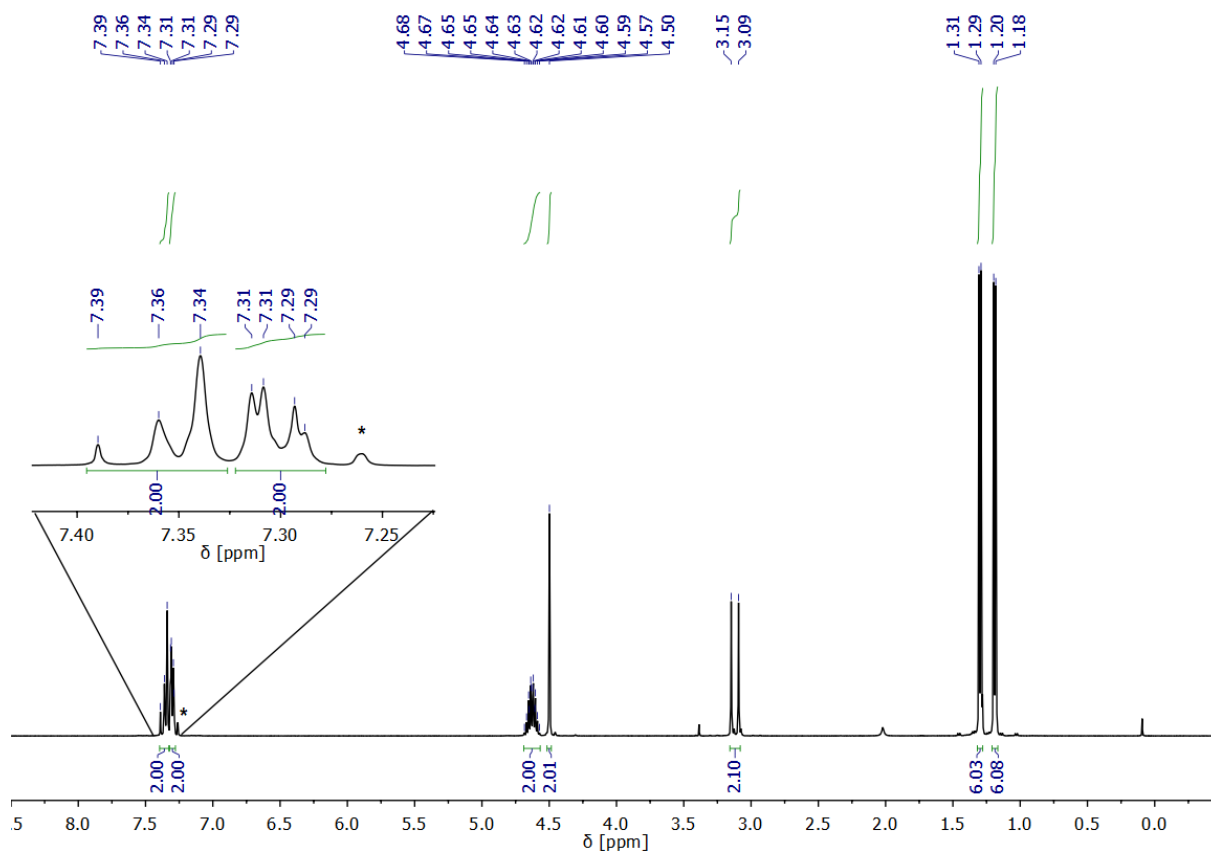

Figure 6: <sup>1</sup>H-NMR spectrum of **L4** in CDCl<sub>3</sub> (\*).

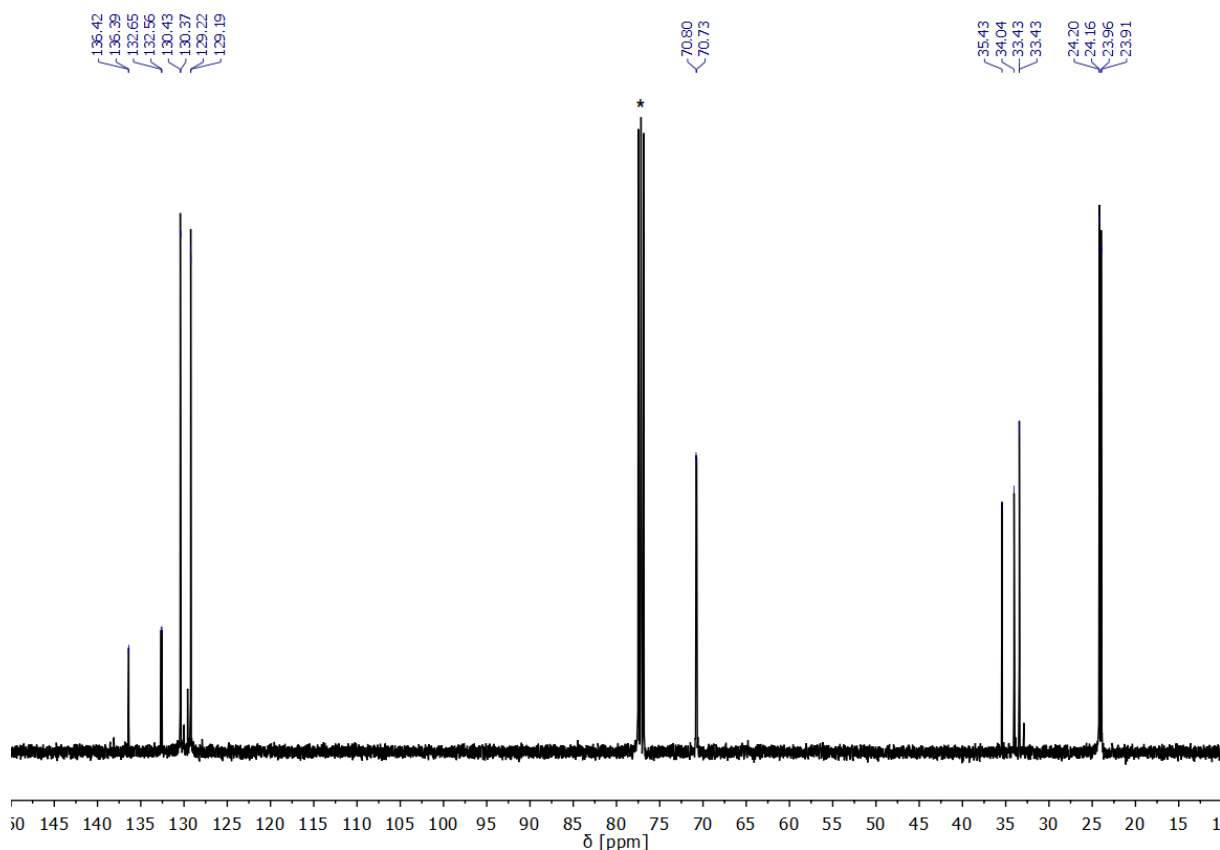

Figure 7:  $^{13}\text{C}$ -NMR spectrum of **L4** in  $\text{CDCl}_3$  (\*).

#### 1.1.4 *diisopropyl ((4'-bromo-[1,1'-biphenyl]-4-yl)methyl) phosphonate (L5)*

The first three synthesis steps (**S2**, **S3**, **S4**) were performed according to modified procedures by F. Leroux et al. and M. J. Krische et al..<sup>4,5</sup>:

4,4'-dibromo-1,1'-biphenyl (31.2 g, 100 mmol, 1.00 eq.) was dissolved in dry THF (400 mL) in a 500 mL Schlenk flask with big stirrer and cooled to  $-100\text{ }^\circ\text{C}$ . Under vigorous stirring, *n*BuLi in hexanes (2.50 M, 40.0 mL, 100 mmol, 1.00 eq) was added dropwise via syringe over a period of ca. 15 min. Then, dry DMF (7.69 mL, 100 mmol, 1.00 eq.) was added in one portion, the cooling-bath was removed, and the mixture was stirred at r.t. for 4 h.  $\text{H}_2\text{O}$  (50 mL) were added to the pale yellow solution and the phases were separated. The organic phase was additionally extracted with brine (50 mL) and the combined aq. phases were extracted with  $\text{Et}_2\text{O}$  (3 x 50 mL). The combined org. phases were dried over  $\text{MgSO}_4$ , filtered and the solvent was removed under reduced pressure yielding a 4:1 mixture of the mono- and dialdehyde. Recrystallization from neat  $\text{CHCl}_3$  and subsequently from a mixture of  $\text{EtOAc}$ /hexanes (1.5:1) afforded **S2** as a white solid (18.3 g, 70.0 mmol, 70%).  $^1\text{H-NMR}$  (400 MHz,  $\text{CDCl}_3$ ):  $\delta$  = 10.05 (s, 1H, CHO), 7.95 (d, 2H,  $^3J_{\text{HH}} = 8.2\text{ Hz}$ , H2 + H6), 7.70 (d, 2H,  $^3J_{\text{HH}} = 8.2\text{ Hz}$ , H3 + H5), 7.60 (d, 2H,  $^3J_{\text{HH}} = 8.5\text{ Hz}$ , H3' + H5'), 7.49 (d, 2H,  $^3J_{\text{HH}} = 8.5\text{ Hz}$ , H2' + H6') ppm.



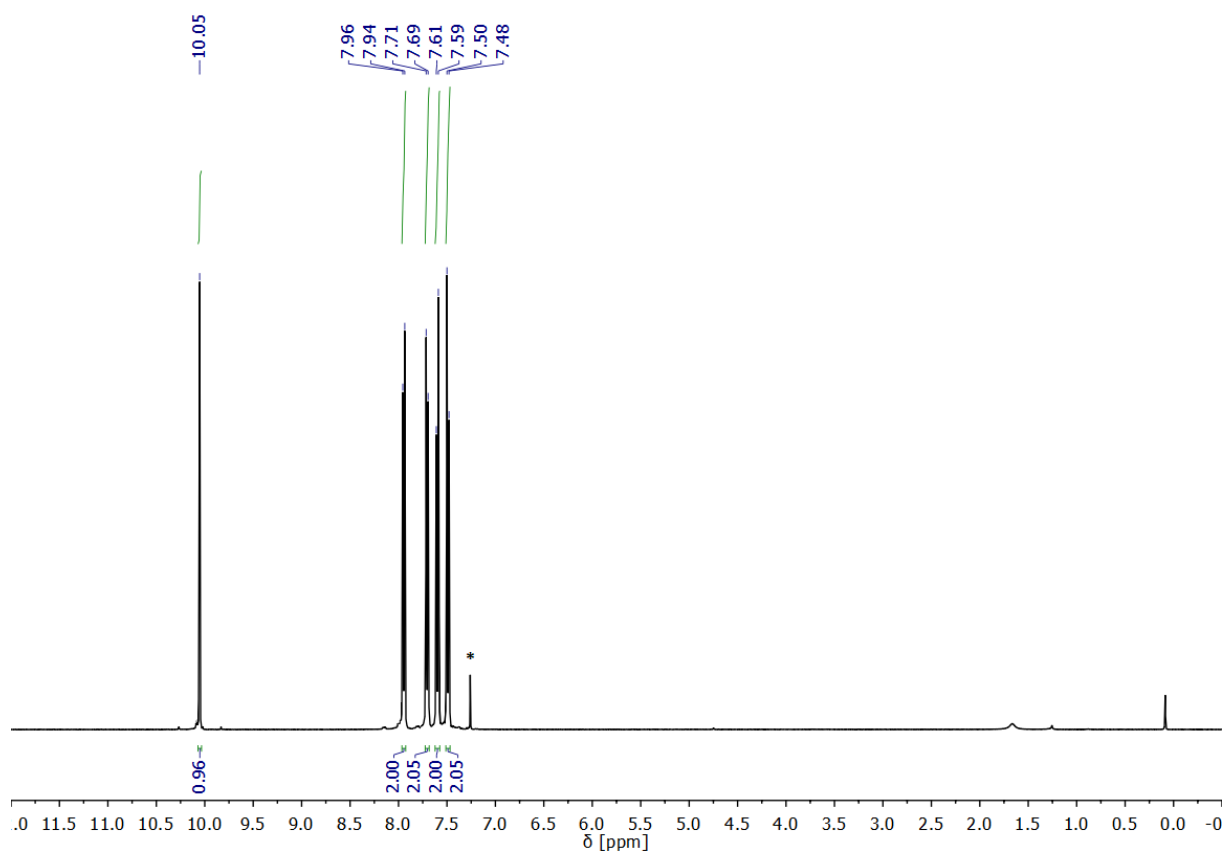

Figure 8:  $^1\text{H-NMR}$  spectrum of **S2** in  $\text{CDCl}_3$  (\*).

4'-bromo-[1,1'-biphenyl]-4-carbaldehyde (**S2**) (15.0 g, 57.5 mmol, 1.00 eq.) was dissolved in a mixture of dry THF (100 mL) and dry MeOH (60 mL) in a 250 mL round-bottom flask and cooled with a r.t. water-bath.  $\text{NaBH}_4$  tablets (3.26 g, 86.3 mmol, 1.50 eq.) were added over a period of ca. 20 min. and the mixture was stirred at r.t. overnight. An aq. solution of HCl (ca. 2 M, 60 mL) was slowly added and the formed precipitate was filtered off and washed several times with  $\text{Et}_2\text{O}$ . The filtrate was transferred to a separation-funnel, additional  $\text{H}_2\text{O}$  (50 mL) was added, and the phases were separated. The aq. phase was extracted with  $\text{Et}_2\text{O}$  (3 x 50 mL). The combined org. phases were extracted with brine (2 x 50 mL), dried over  $\text{MgSO}_4$ , filtered, and evaporated. After recrystallization from  $\text{EtOAc}$ /hexanes (1:1), **S3** was obtained as a white solid (10.5 g, 39.7 mmol, 69%).  $^1\text{H-NMR}$  (400 MHz,  $\text{CDCl}_3$ ):  $\delta$  = 7.61–7.52 (m, 4H,  $\text{H}_2' + \text{H}_6'$ ,  $\text{H}_3' + \text{H}_5'$ ), 7.48–7.38 (m, 4H,  $\text{H}_2 + \text{H}_6$ ,  $\text{H}_3 + \text{H}_5$ ), 4.74 (s, 2H,  $\text{CH}_2$ ), 1.77 (s, 1H, OH) ppm.

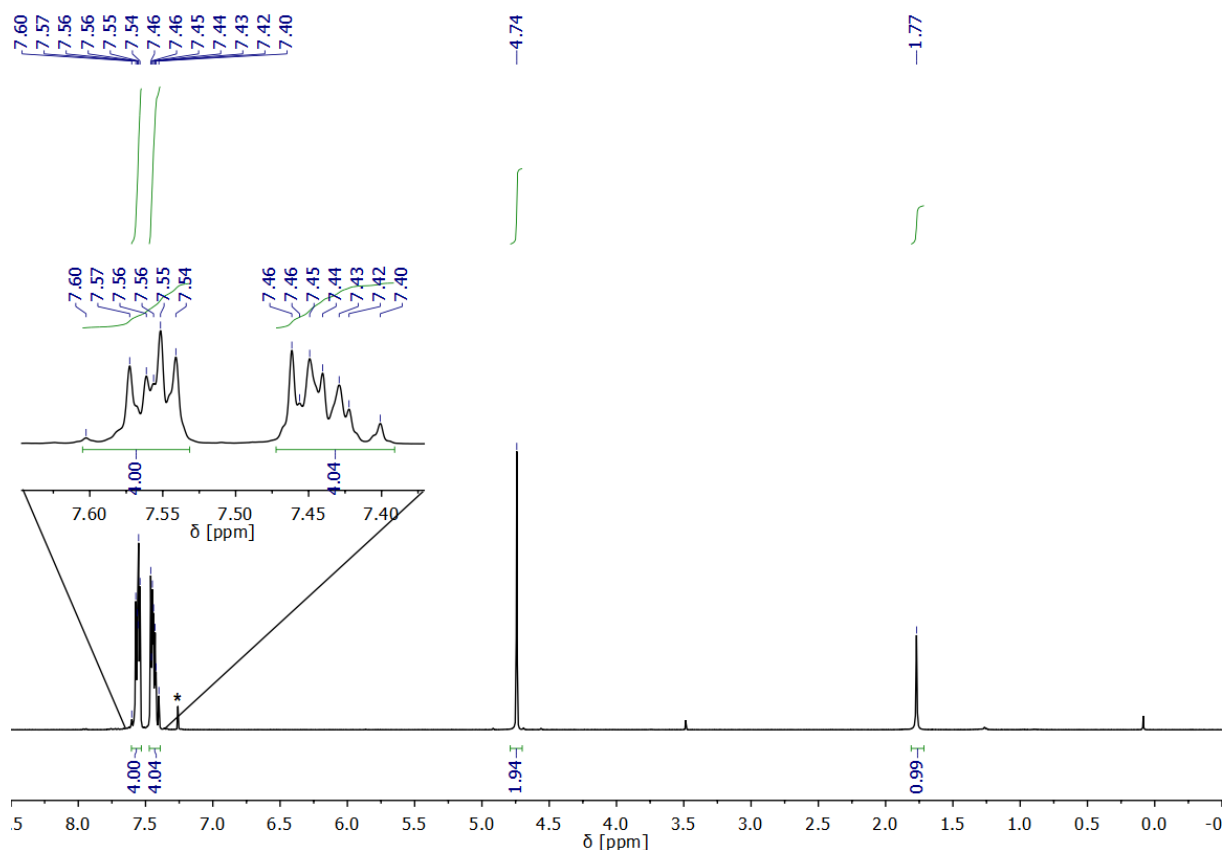

Figure 9: <sup>1</sup>H-NMR spectrum of **S3** in CDCl<sub>3</sub> (\*).

(4'-bromo-[1,1'-biphenyl]-4-yl)methanol (**S3**) (11.3 g, 42.9 mmol, 1.00 eq.) was dissolved in dry THF (120 mL) in a 250 mL Schlenk flask. The flask was attached to a dropping-funnel under argon and cooled to 0 °C. The dropping-funnel was charged with dry THF (40 mL) and PBr<sub>3</sub> (2.85 mL, 30.0 mmol, 0.7 eq.) and the mixture was slowly dropwise added over a period of ca. 45 min.. The cooling-bath was removed, and the solution was stirred at r.t. overnight. The mixture was poured onto 100 g of ice and was transferred to a separation-funnel. The aq. phase was extracted with Et<sub>2</sub>O (3 x 50 mL) and the combined org. phases were extracted with brine (3 x 50 mL). The org. phase was dried over Na<sub>2</sub>SO<sub>4</sub>, filtered, and evaporated. Washing of the obtained off-white solid in a Büchner-funnel with -20 °C MeOH and subsequent drying afforded **S4** as a white solid (11.0 g, 33.7 mmol, 79%). **<sup>1</sup>H-NMR** (400 MHz, CDCl<sub>3</sub>): δ = 7.59–7.51 (m, 4H, H2' + H6', H3' + H5'), 7.49–7.42 (m, 4H, H2 + H6, H3 + H5), 4.54 (s, 2H, CH<sub>2</sub>) ppm.

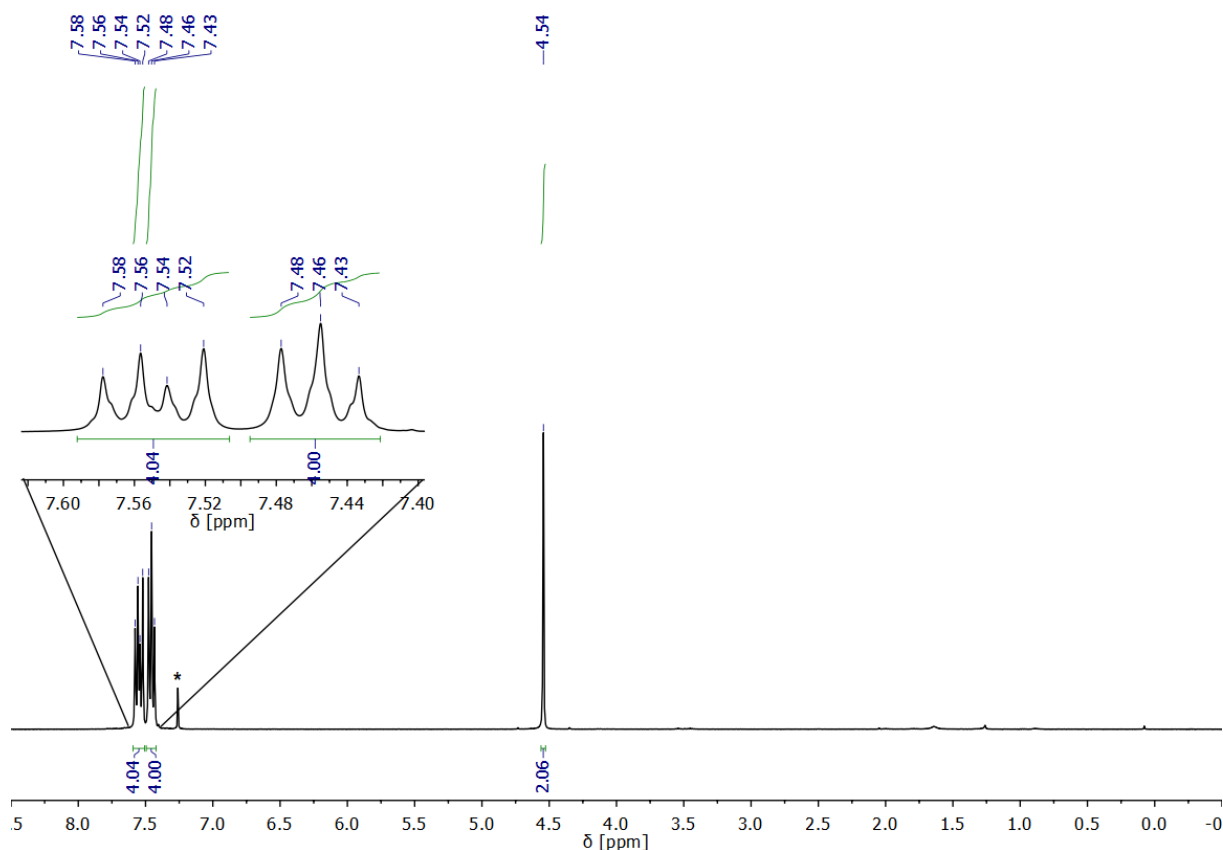

Figure 10:  $^1\text{H-NMR}$  spectrum of **54** in  $\text{CDCl}_3$  (\*).

4-bromo-4'-(bromomethyl)-1,1'-biphenyl (**54**) (13.5 g 41.4 mmol, 1.00 eq.) and  $\text{P}(\text{O}^i\text{Pr})_3$  (10.7 mL, 43.5 mmol, 1.05 eq.) were mixed in a 50 mL round-bottom flask under stirring. The flask was attached to a distillation bridge with Vigreux column and the mixture was heated at  $165\text{ }^\circ\text{C}$  for 2.5 h. The biphenyl starting material melted at  $95\text{--}100\text{ }^\circ\text{C}$  oil bath. At  $135\text{ }^\circ\text{C}$  oil bath, the formed  $^i\text{PrBr}$  started to distill off. The mixture was cooled to r.t. forming an opaque oil. The opaque oil was diluted with MeOH and filtered to obtain a clear and colorless to pale yellow oil. First, residual  $^i\text{PrBr}$  was removed under reduced pressure ( $2.3 \times 10^{-2}$  mbar) at r.t., and then the temp. was successively raised to  $50\text{ }^\circ\text{C}$  and  $100\text{ }^\circ\text{C}$ . Compound **L5** was obtained as an oil which solidified to an off-white solid upon standing (15.9 g, 38.6 mmol, 93%).  $^1\text{H-NMR}$  (400 MHz,  $\text{CDCl}_3$ ):  $\delta = 7.56\text{--}7.51$  (m, 2H, H3' + H5'), 7.48 (d, 2H,  $^3J_{\text{HH}} = 8.0$  Hz, H2' + H6'), 7.43 (d, 2H,  $^3J_{\text{HH}} = 8.5$  Hz, H3 + H5), 7.37 (dd, 2H,  $^3J_{\text{HH}} = 8.2$ ,  $^4J_{\text{HH}} = 2.3$  Hz, H2 + H6), 4.68–4.56 (m, 2H,  $\text{CH}(\text{CH}_3)_2$ ), 3.13 (d, 2H,  $^2J_{\text{PH}} = 21.8$  Hz,  $\text{CH}_2$ ), 1.29 (d, 6H,  $^3J_{\text{HH}} = 6.2$  Hz,  $\text{CH}(\text{CH}_3)_2$ ), 1.19 (d, 6H,  $^3J_{\text{HH}} = 6.2$  Hz,  $\text{CH}(\text{CH}_3)_2$ ) ppm;  $^{13}\text{C}\{^1\text{H}\}\text{-NMR}$  (100 MHz,  $\text{CDCl}_3$ ):  $\delta = 139.8$  (d, 1C,  $^6J_{\text{PC}} = 1.4$  Hz, C1'), 138.5 (d, 1C,  $^5J_{\text{PC}} = 3.8$  Hz, C1), 131.9 (s, 2C, C3' + C5'), 131.7 (d, 1C,  $^2J_{\text{PC}} = 9.2$  Hz, C4), 130.5 (d, 2C,  $^3J_{\text{PC}} = 6.7$  Hz, C3 + C5), 128.7 (d, 2C,  $^7J_{\text{PC}} = 0.7$  Hz, C2' + C6'), 127.0 (d, 2C,  $^4J_{\text{PC}} = 3.1$  Hz, C2 + C6), 121.6 (s, 1C, C4'), 70.7 (d, 2C,  $^2J_{\text{PC}} = 7.0$  Hz,  $\text{CH}(\text{CH}_3)_2$ ), 34.6 (d, 1C,  $^1J_{\text{PC}} = 139.5$  Hz,  $\text{CH}_2$ ), 24.2 (d, 2C,  $^3J_{\text{PC}} = 3.8$  Hz,  $\text{CH}(\text{CH}_3)_2$ ), 24.0 (d, 2C,  $^3J_{\text{PC}} = 5.1$  Hz,  $\text{CH}(\text{CH}_3)_2$ ) ppm;  $^{31}\text{P}\{^1\text{H}\}\text{-NMR}$  (202 MHz,  $\text{CDCl}_3$ ):  $\delta = 24.4$  (s) ppm; IR (ATR)  $\tilde{\nu} = 1236$  (P=O), 1108 (P–O $^i$ Pr)  $\text{cm}^{-1}$ ; MS (ESI+)  $m/z$  (%): 411.17 (90) [ $\text{M} + \text{H}^+$ ] $^+$ , 823.32 (100) [ $2\text{M} + \text{H}^+$ ] $^+$ ; Elemental analysis in % (calculated)  $\text{C}_{19}\text{H}_{24}\text{BrO}_3\text{P}$  (411.27 g/mol): C 55.74 (55.49), H 5.95 (5.88).

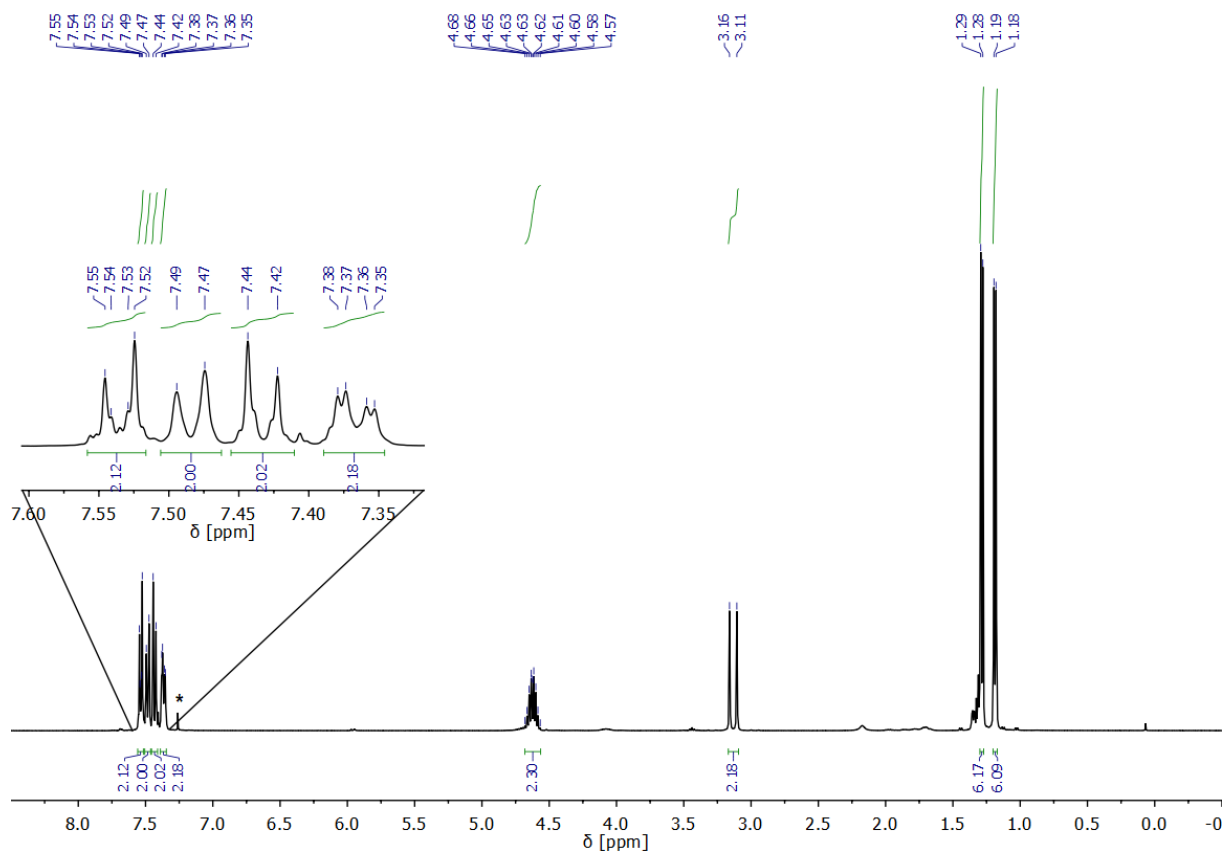

Figure 11:  $^1\text{H-NMR}$  spectrum of **L5** in  $\text{CDCl}_3$  (\*).

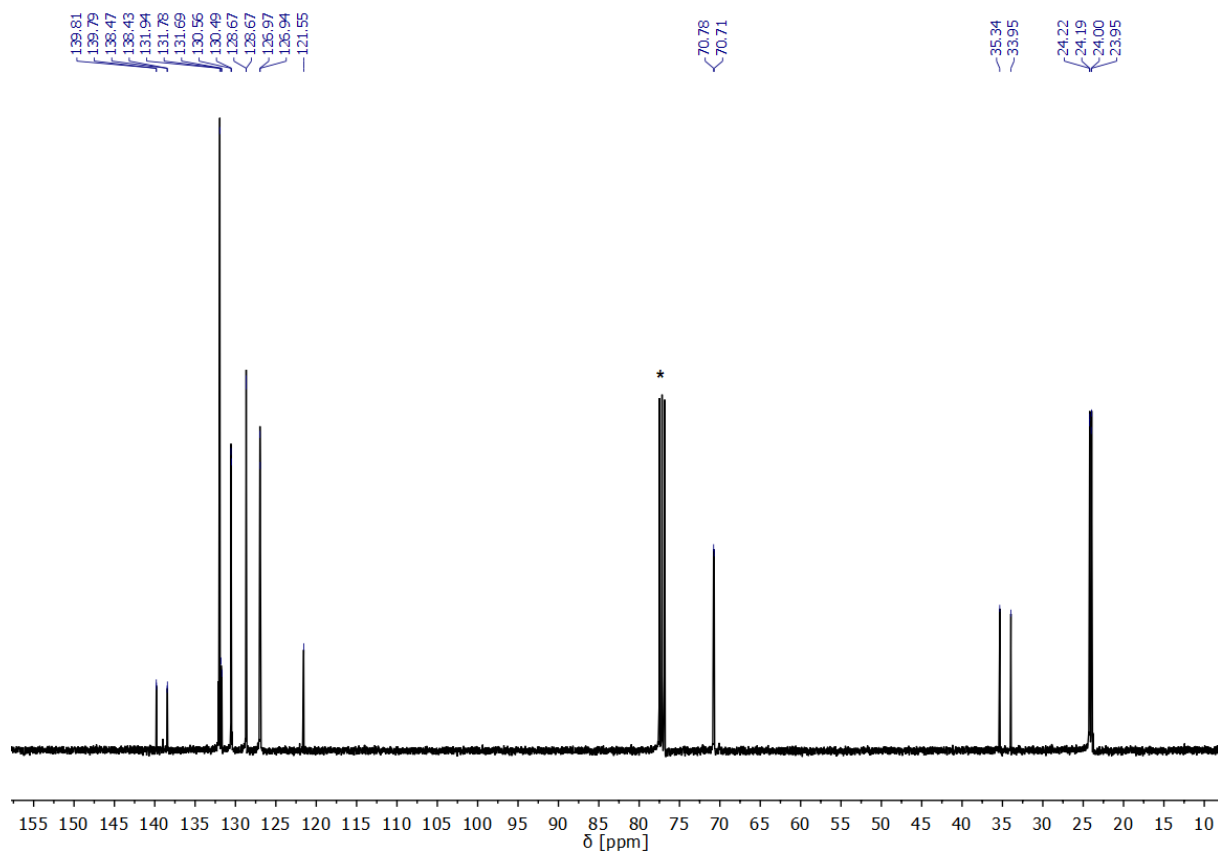

Figure 12:  $^{13}\text{C-NMR}$  spectrum of **L5** in  $\text{CDCl}_3$  (\*).

### 1.1.5 *diisopropyl 4-bromo-2,3,5,6-tetrafluorobenzylphosphonate (L6)*

The first two synthesis steps (**S5**, **S6**) were performed according to modified procedures by A. Pfaltz et al..<sup>6</sup>:

In a 100 mL pressure proof Schlenk tube with screw cap and Young valve, water free LiBr (8.86 g, 102 mmol, 1.13 eq.) from the glovebox was suspended in dry NMP (50 mL). 2,3,4,5,6-pentafluorobenzaldehyde (11.2 mL, 90.3 mmol, 1.00 eq.) was molten in a 45 °C water-bath, added via syringe and the yellow solution was heated at 165 °C for 3.5 h. The formed brown suspension was cooled to r.t., filtered over celite at ambient atmosphere (frit P3), and the filter cake was washed with NMP (5 x 10 mL). H<sub>2</sub>O (200 mL) was added under stirring to the filtrate and the formed beige precipitate was recovered via filtration (frit P3), washed with H<sub>2</sub>O (3 x 20 mL), air-dried on a filter paper and additionally dried in a desiccator over CaCl<sub>2</sub>. The filtrate was extracted with Et<sub>2</sub>O (3 x 50 mL) and the solvent was removed. The orange oily residue was diluted with H<sub>2</sub>O (10 mL) and the formed precipitate was recovered and dried as above. The combined crude products were recrystallized from Et<sub>2</sub>O, decanted hot, cooled to r.t. and stored at -20 °C. The formed crystals were recovered by decanting the supernatant solution, washing the solid material with -20 °C Et<sub>2</sub>O (2 x 15 mL) and drying. Successive reduction of the mother liquor volume yielded **S5** in several crops as beige to amber crystals (17.7 g, 69.0 mmol, 76%). <sup>1</sup>H-NMR (400 MHz, CDCl<sub>3</sub>): δ = 10.3 (s, 1H, CHO) ppm; <sup>19</sup>F-NMR (375 MHz, CDCl<sub>3</sub>): δ = -131.3–131.4 (m, 2F, F3 + F5), -141.0– -141.1 (m, 2F, F2 + F6) ppm.

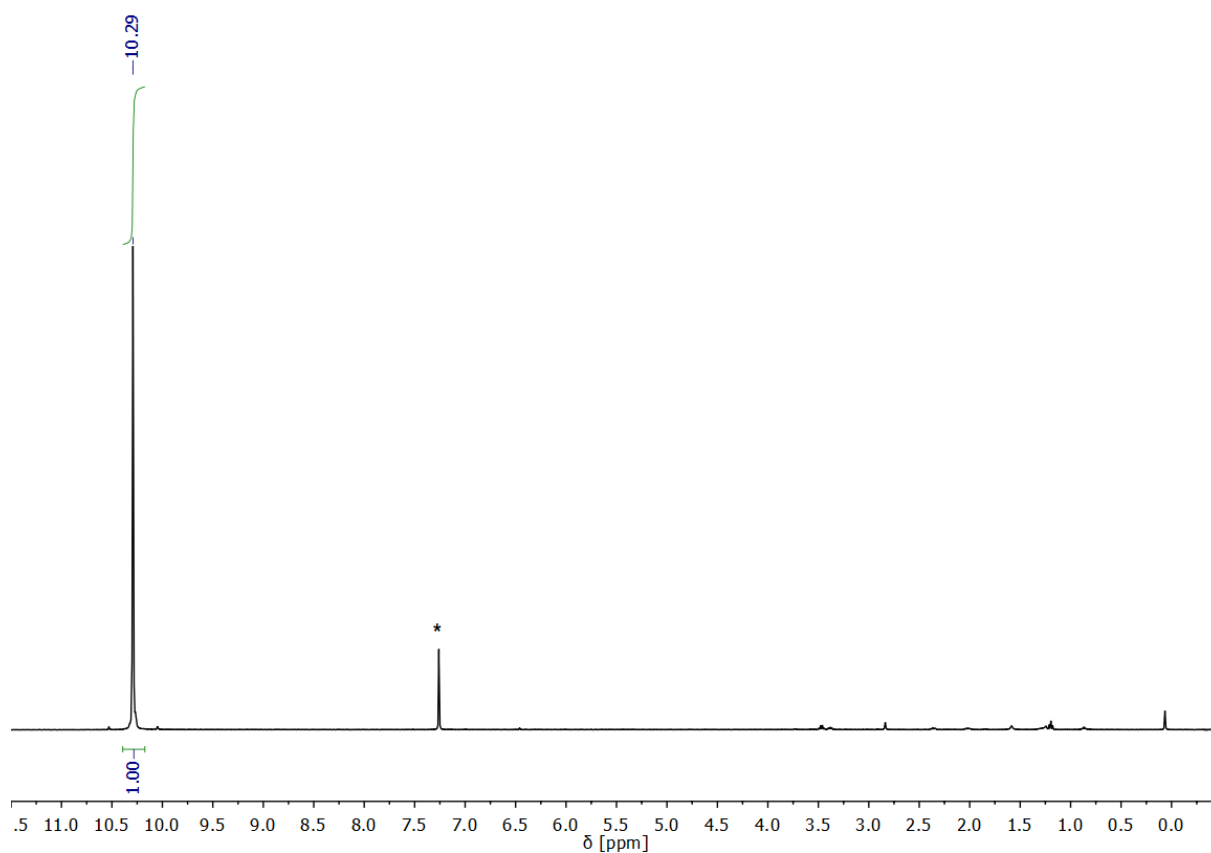

Figure 13: <sup>1</sup>H-NMR spectrum of **S5** in CDCl<sub>3</sub> (\*).

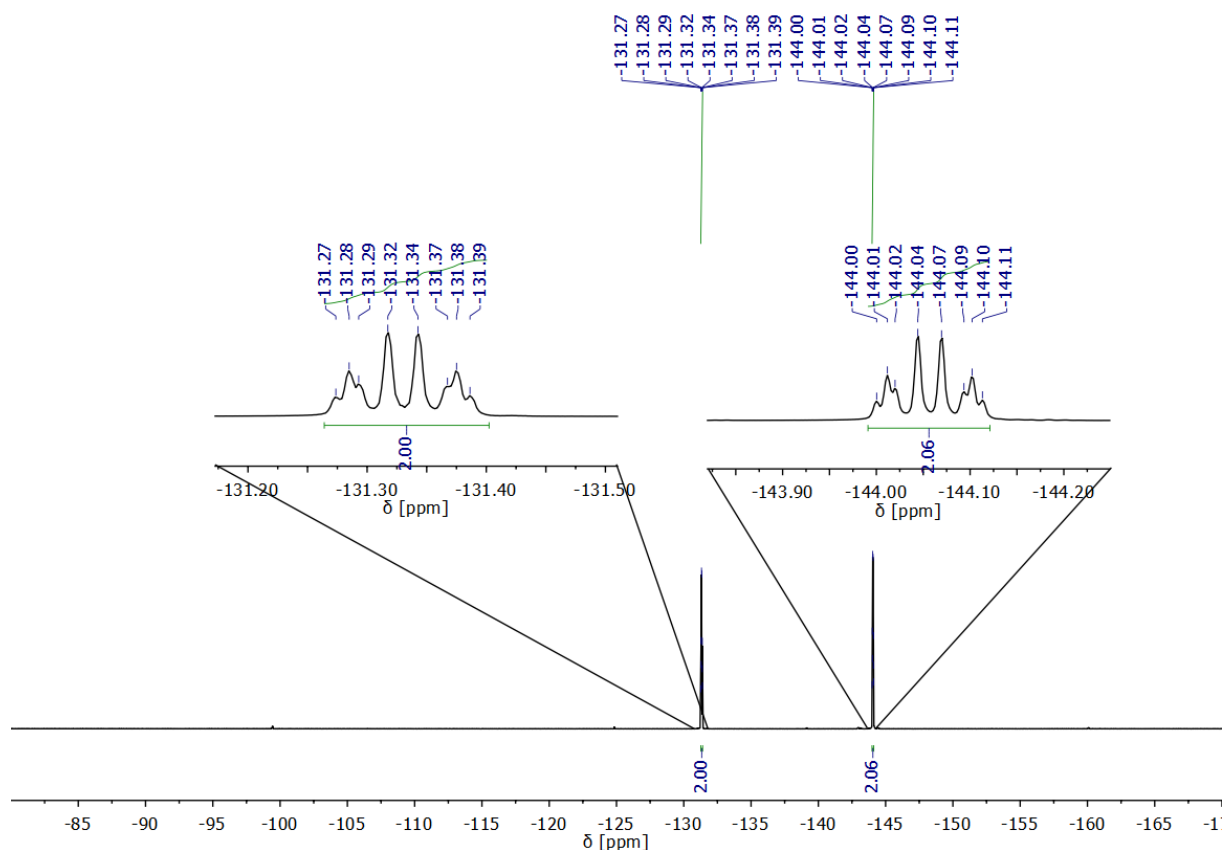

Figure 14:  $^{19}\text{F}$ -NMR spectrum of **S5** in  $\text{CDCl}_3$ .

In a 250 mL round-bottom flask, 4-bromo-2,3,5,6-tetrafluorobenzaldehyde (**S5**) (18.4 g, 71.6 mmol, 1.00 eq.) was dissolved in dry MeOH (150 mL) and cooled to 0 °C.  $\text{NaBH}_4$  (4.06 g, 107 mmol, 1.50 eq.) was portion wise added over a period of ca. 30 min., the mixture was stirred at 0 °C for additional 1 h, then at r.t. for 3 h. The formed pale-yellow solution was poured into a 0 °C aq. HCl solution (ca. 3.6%, 600 mL) and was stirred for 5 min.. The formed pale-yellow precipitate was recovered by filtration (frit P3), washed thoroughly with  $\text{H}_2\text{O}$  (4 x 30 mL), air-dried on a filter paper and additionally dried in a desiccator over  $\text{CaCl}_2$ . The filtrate was evaporated in a big bowl to a volume of ca. 100 mL within several days, the formed precipitate was recovered via filtration, washed with  $\text{H}_2\text{O}$  (4 x 20 mL) and dried as above. **S6** was obtained as an off-white solid (13.3 g, 51.4 mmol, 72%).  $^1\text{H}$ -NMR (400 MHz,  $\text{CDCl}_3$ ):  $\delta$  = 4.79 (s, 2H,  $\text{CH}_2$ ), 2.37 (s, 1H, OH) ppm;  $^{19}\text{F}$ -NMR (375 MHz,  $\text{CDCl}_3$ ):  $\delta$  = -133.1– -133.2 (m, 2F, F3 + F5), -143.3– -143.4 (m, 2F, F2 + F6) ppm.

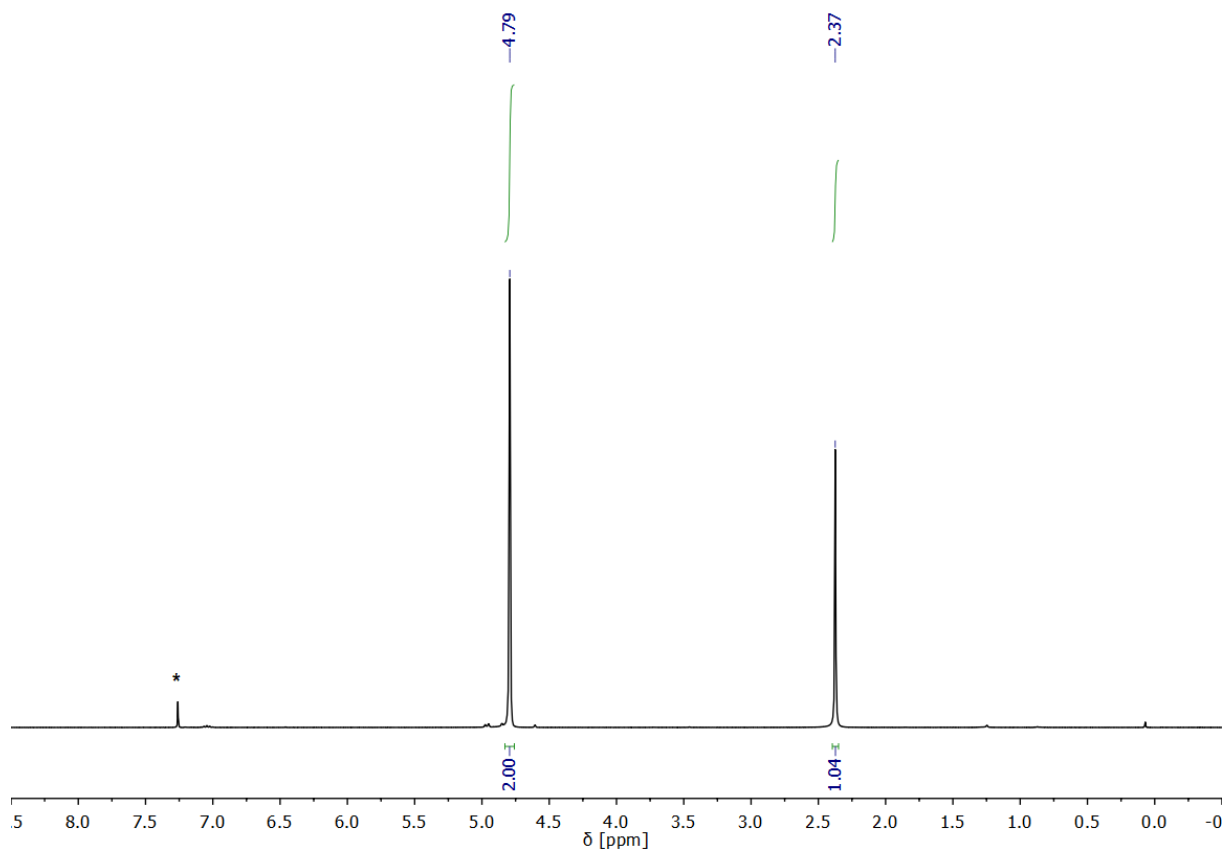

Figure 15:  $^1\text{H-NMR}$  spectrum of **S6** in  $\text{CDCl}_3$  (\*).

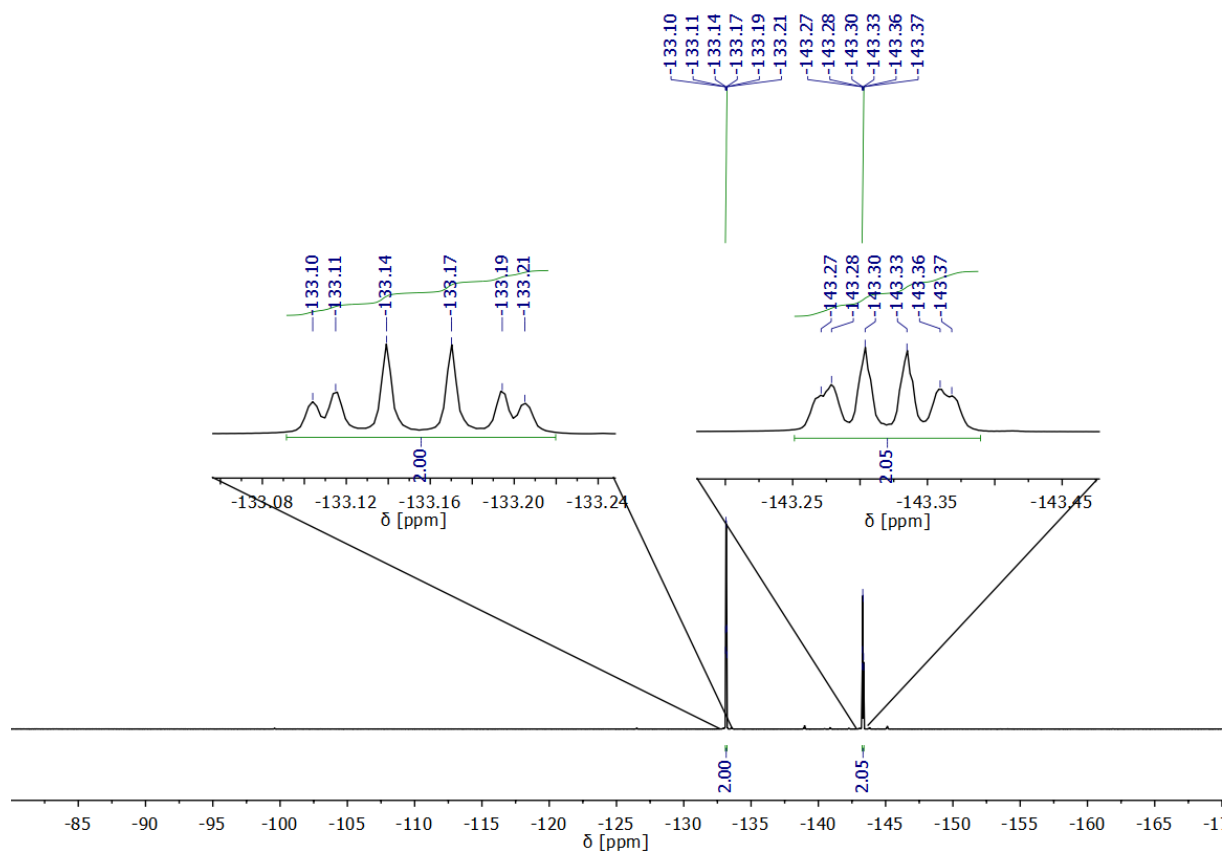

Figure 16:  $^{19}\text{F-NMR}$  spectrum of **S6** in  $\text{CDCl}_3$ .

(4-bromo-2,3,5,6-tetrafluorophenyl)methanol (**S6**) (15.0 g, 57.9 mmol, 1.00 eq.) was dissolved in dry THF (150 mL) in a 250 mL Schlenk flask. The flask was attached to a dropping-funnel under argon and cooled to 0 °C. The dropping-funnel was charged with dry THF (40 mL) and PBr<sub>3</sub> (3.85 mL, 40.5 mmol, 0.7 eq.) and the mixture was slowly dropwise added over a period of ca. 45 min.. The cooling-bath was removed, and the solution was stirred at r.t. overnight. The yellow solution was poured under stirring into H<sub>2</sub>O (300 mL) and was transferred to a separation-funnel. The aq. phase was extracted with Et<sub>2</sub>O (3 x 50 mL) and the combined org. phases were extracted with brine (3 x 50 mL). The org. phase was dried over Na<sub>2</sub>SO<sub>4</sub>, filtered, and evaporated. The obtained orange oil was purified by fractional distillation (2.5 x 10<sup>-2</sup> mbar, 105 °C oil bath, Vigreux column coated with aluminum foil) yielding **S7** (bp. 45-47 °C) as a colorless oil (17.1 g, 53.3 mmol, 92%). **<sup>1</sup>H-NMR** (400 MHz, CDCl<sub>3</sub>): δ = 4.50 (s, 2H, CH<sub>2</sub>) ppm; **<sup>13</sup>C{<sup>1</sup>H}-NMR** (100 MHz, CDCl<sub>3</sub>): δ = 146.4–146.0 (m, 2C, C3 + C5) 143.9–143.5 (m, 2C, C2 + C6), 116.7 (t, 1C, <sup>2</sup>J<sub>FC</sub> = 17.0 Hz, C1), 101.0 (tt, 1C, <sup>2</sup>J<sub>FC</sub> = 22.5, <sup>3</sup>J<sub>FC</sub> = 2.0 Hz, C4), 16.4–16.3 (m, 1C, CH<sub>2</sub>) ppm; **<sup>19</sup>F-NMR** (375 MHz, CDCl<sub>3</sub>): δ = -132.4– -132.6 (m, 2F, F3 + F5), -141.2– -141.4 (m, 2F, F2 + F6) ppm; **IR** (ATR)  $\tilde{\nu}$  = 2124, 2095, 1638, 1490, 1463, 1408, 1274, 1218, 1067, 1123, 1076, 1042, 1004, 974, 860, 827, 646, 611 cm<sup>-1</sup>; **GC-MS (EI, 70 eV)** *m/z* (%): 321.85 (5) [M + H]<sup>+</sup>, 240.92 (100) [M - Br]<sup>+</sup>, 162.00 (75) [M - 2Br]<sup>+</sup>, 143.00 (40) [M - 2Br - F]<sup>+</sup>; **Elemental analysis** in % (calculated) C<sub>7</sub>H<sub>2</sub>Br<sub>2</sub>F<sub>4</sub> (321.89 g/mol): C 26.52 (26.12), H 0.65 (0.63).

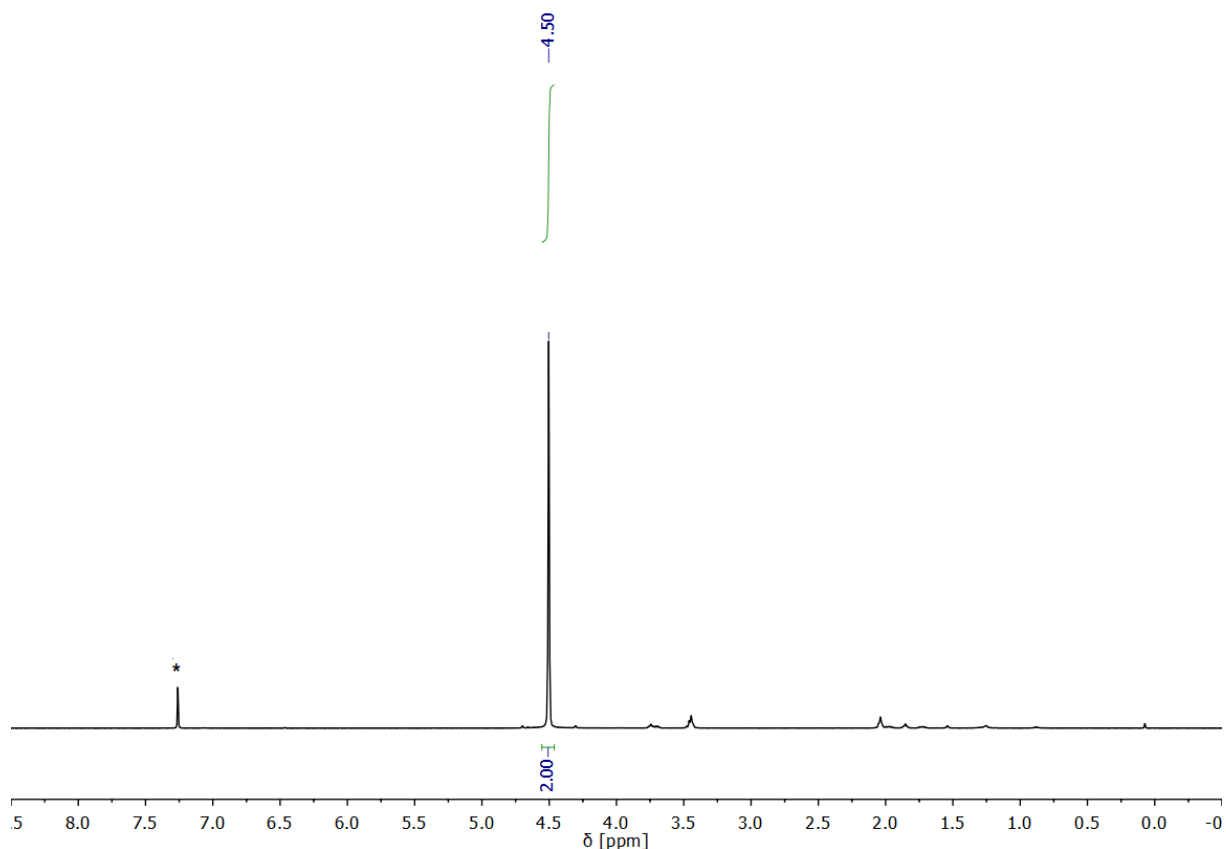

Figure 17: <sup>1</sup>H-NMR spectrum of **S7** in CDCl<sub>3</sub> (\*) + a minor impurity.



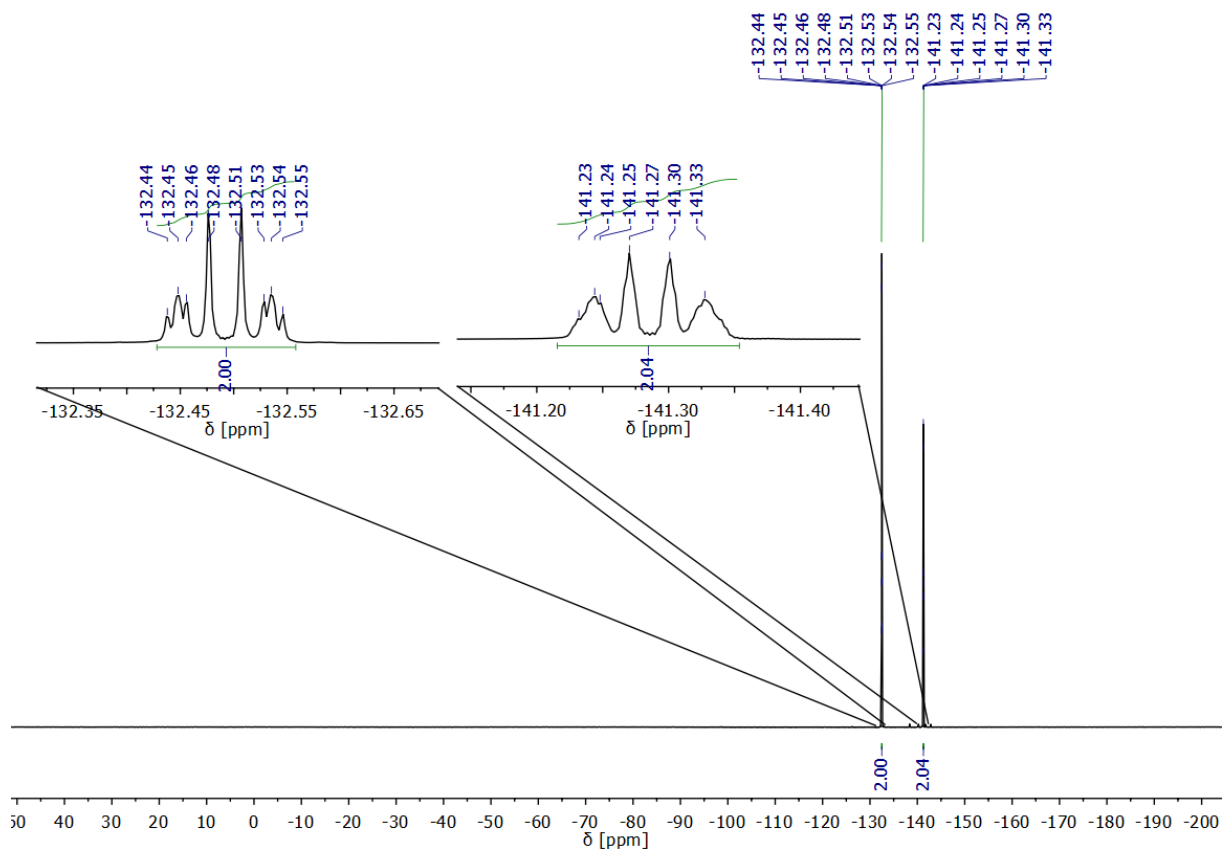

Figure 18:  $^{19}\text{F}$ -NMR spectrum of **S7** in  $\text{CDCl}_3$ .

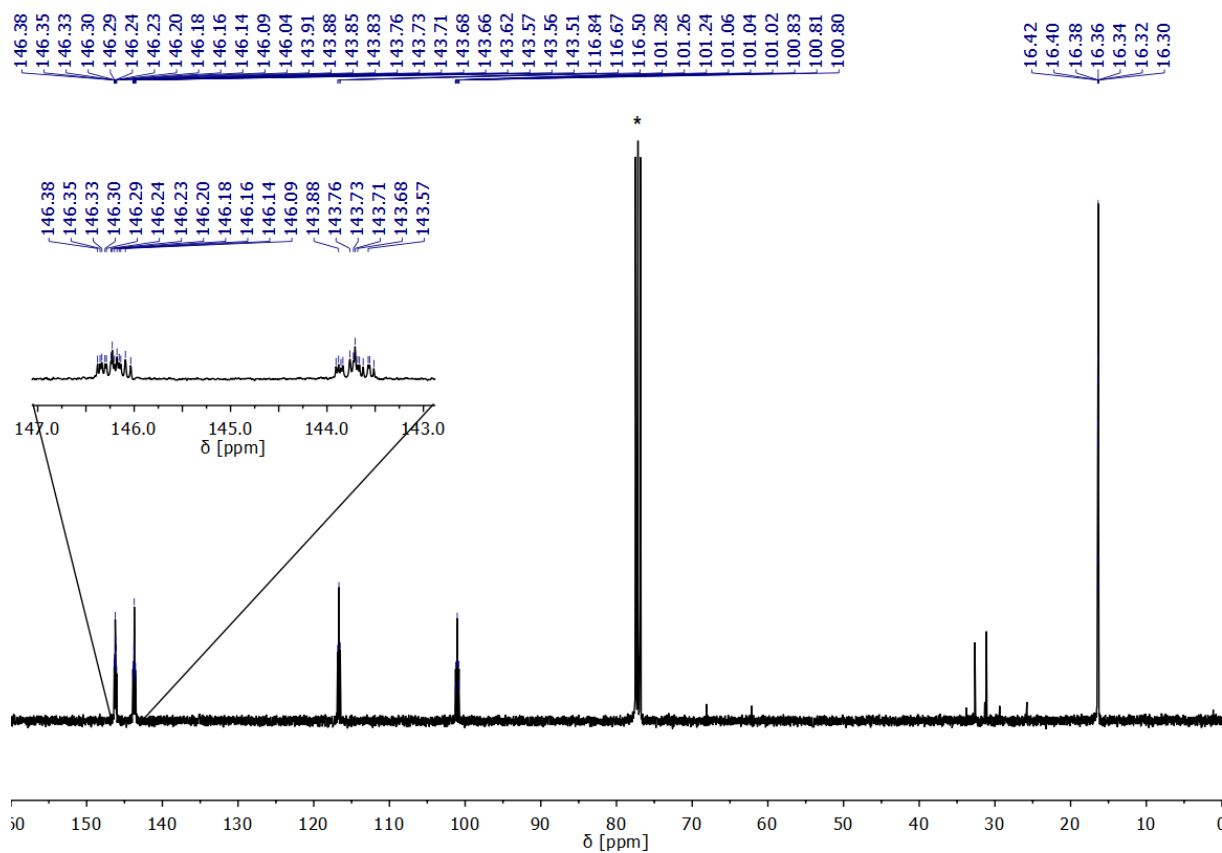

Figure 19:  $^{13}\text{C}$ -NMR spectrum of **S7** in  $\text{CDCl}_3$  (\*) + a minor impurity.

1-bromo-4-(bromomethyl)-2,3,5,6-tetrafluorobenzene (**S7**) (17.1 g 53.1 mmol, 1.00 eq.) and  $P(O^iPr)_3$  (13.8 mL, 55.8 mmol, 1.05 eq.) were mixed in a 50 mL round-bottom flask under stirring. The flask was attached to a distillation bridge with Vigreux column and the mixture was heated at 165 °C for 2.5 h. At 130 °C, the formed  $iPrBr$  started to distill off. The colorless oil was cooled to r.t.. First, residual  $iPrBr$  and most side products/impurities were distilled off under reduced pressure ( $5.3 \times 10^{-3}$  mbar) at r.t., then the temp. was successively raised to 160 °C. Further workup via flash chromatography (PF-30SIHP-F0040 column; Gradient: 3 CV neat DCM => 1 CV to reach DCM/EtOAc (9:1) => 10 CV DCM/EtOAc (9:1)) yielded **L6** as a colorless oil which solidifies to a white solid upon standing (19.5 g, 47.8 mmol, 90%).  $^1H$ -NMR (400 MHz,  $CDCl_3$ ):  $\delta$  = 4.72–4.61 (m, 2H,  $CH(CH_3)_2$ ), 3.16 (d, 2H,  $^2J_{PH} = 21.6$  Hz,  $CH_2$ ), 1.25 (d, 12H,  $^3J_{HH} = 6.2$  Hz,  $CH(CH_3)_2$ ) ppm;  $^{13}C\{^1H\}$ -NMR (100 MHz,  $CDCl_3$ ):  $\delta$  = 146.6–145.9 (m, 2C, C3 + C5), 144.1–143.5 (m, 2C, C2 + C6), 112.2 (td, 1C,  $^2J_{FC} = 18.2$ ,  $^2J_{PC} = 10.5$  Hz, C1), 98.4 (tdd, 1C,  $^2J_{FC} = 23.0$ ,  $^5J_{PC} = 4.5$ ,  $^3J_{FC} = 2.1$  Hz, C4), 71.7 (d, 2C,  $^2J_{PC} = 6.9$  Hz,  $CH(CH_3)_2$ ), 24.1 (d, 2C,  $^3J_{PC} = 4.0$  Hz,  $CH(CH_3)_2$ ), 23.9 (d, 2C,  $^3J_{PC} = 5.1$  Hz,  $CH(CH_3)_2$ ), 23.4 (d (partially obscured by doublet at 24.1 ppm), 1C,  $^1J_{PC} = 141.9$  Hz,  $CH_2$ ) ppm;  $^{19}F$ -NMR (375 MHz,  $CDCl_3$ ):  $\delta$  = -134.0– -134.1 (m, 2F, F3 + F5), -139.6– -139.7 (m, 2F, F2 + F6) ppm;  $^{31}P\{^1H\}$ -NMR (202 MHz,  $CDCl_3$ ):  $\delta$  = 19.0 (s) ppm; IR (ATR)  $\tilde{\nu}$  = 1256 (P=O), 1105 (P–O $^iPr$ )  $cm^{-1}$ ; MS (ESI)  $m/z$  (%): 428.91 (100)  $[M + Na]^+$ ; Elemental analysis in % (calculated)  $C_{13}H_{16}BrF_4O_3P$  (407.14 g/mol): C 38.06 (38.35), H 4.05 (3.96).

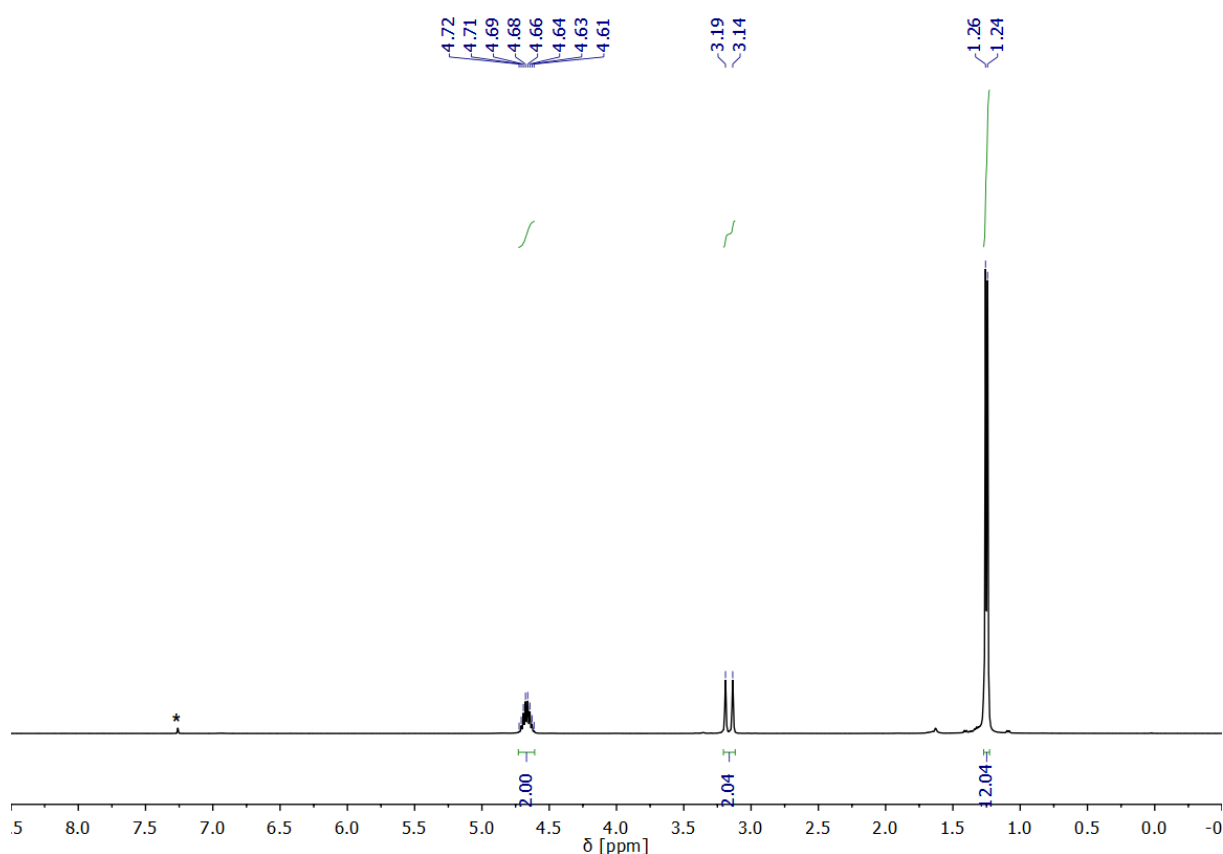

Figure 20:  $^1H$ -NMR spectrum of **L6** in  $CDCl_3$  (\*).

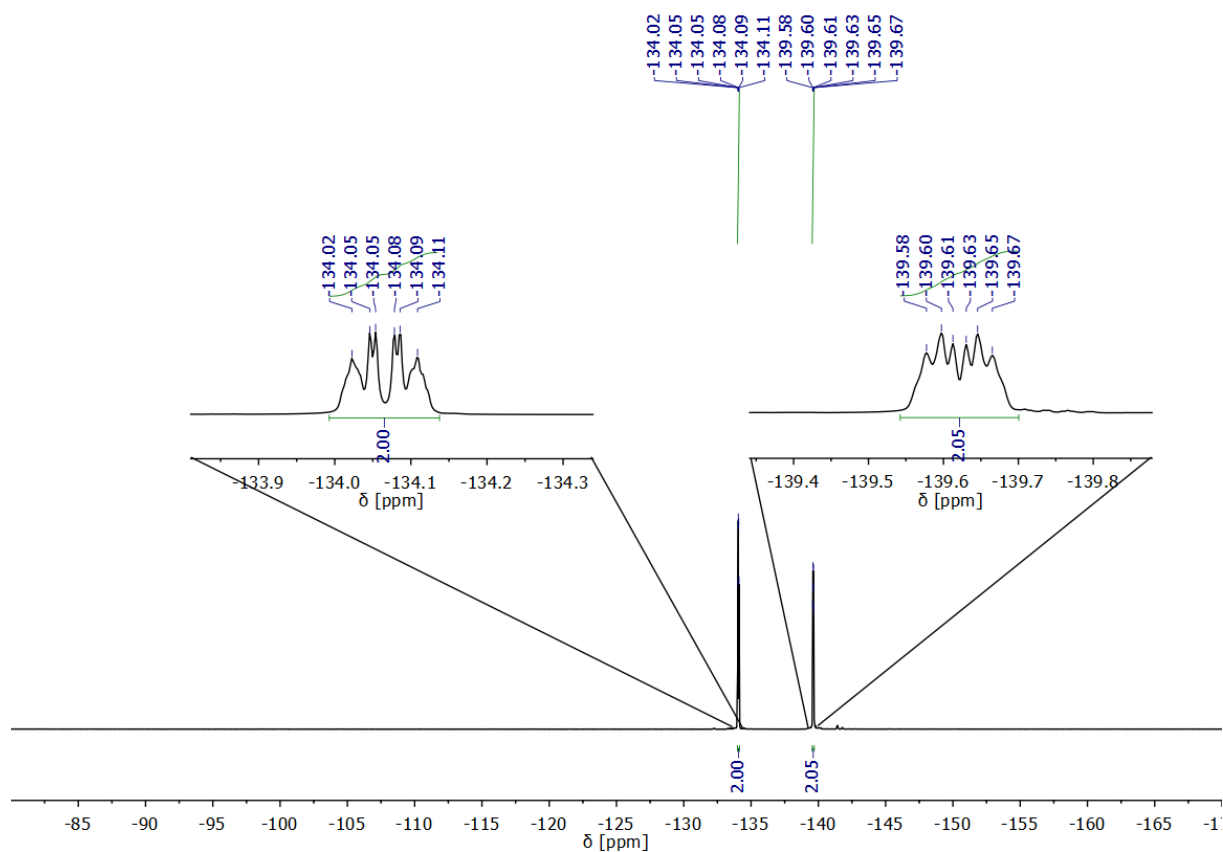

Figure 21:  $^{19}\text{F}$ -NMR spectrum of L6 in  $\text{CDCl}_3$ .

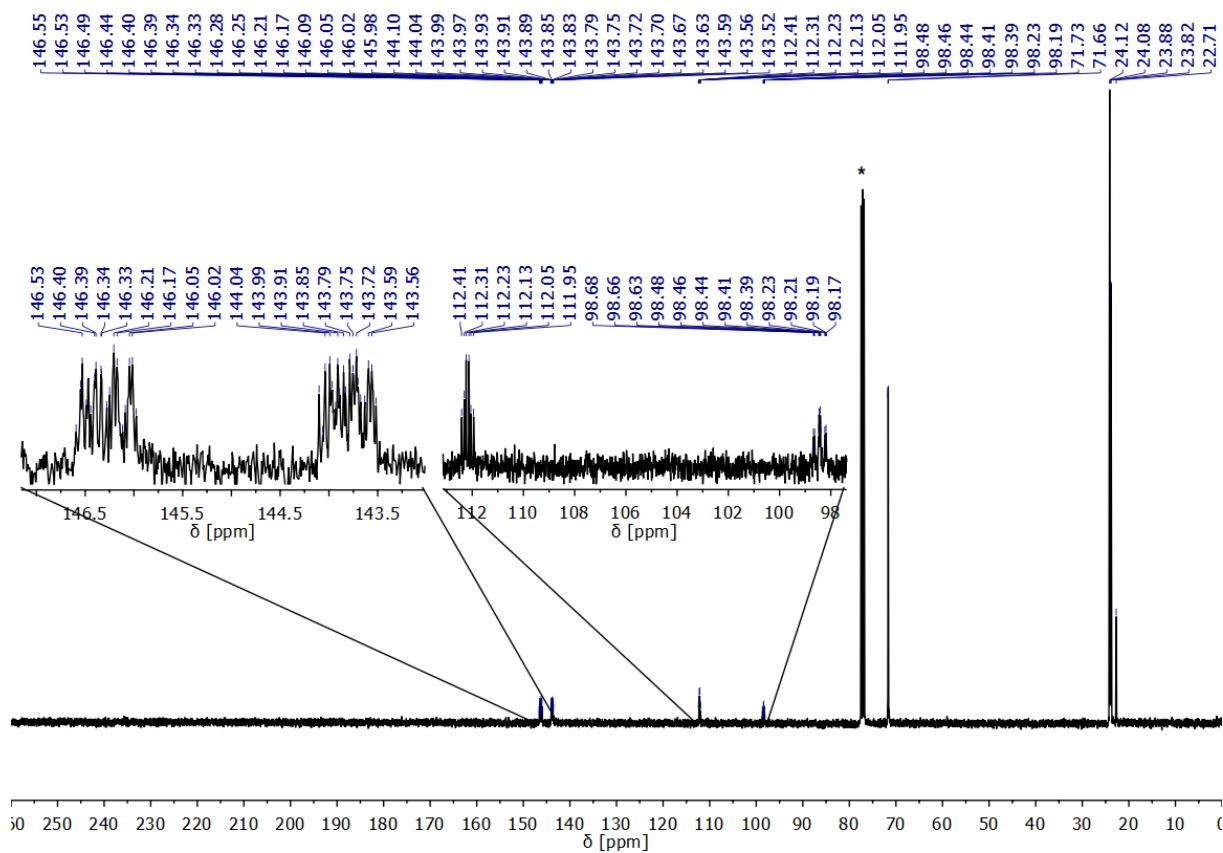

Figure 22:  $^{13}\text{C}$ -NMR spectrum of L6 in  $\text{CDCl}_3$  (\*).

## 1.2 Lanthanide Complexes [1-32] of L1-L6 & NMR Spectra

The corresponding lanthanide salt  $[\text{LnX}_3(\text{H}_2\text{O})_6]$  (1.00 mmol, 1.00 eq.) (Ln = La, Nd, Dy, Er; X =  $\text{NO}_3$ , Cl) was dissolved in EtOH (15 mL). The respective phosphonate ligand (4.00 mmol, 4.00 eq., X = Cl, **L1**, **L2**, **L4**, **L5**, **L6**; 3.00 mmol, 3.00 eq., X =  $\text{NO}_3$ ; **L1**, **L2**) was dissolved in EtOH (10 mL) (Exception: Ligand **L3** (3.00 mmol, 3.00 eq., X = Cl) was dissolved in EtOH (50 mL)). The lanthanide salt solution was added to the ligand solution and the mixture was stirred at r.t. overnight. In case of phosphonate **L3**, the yellow reaction mixtures were filtered prior to EtOH removal and were used without further treatment. For the other complexes, the solvent was evaporated, the obtained residue was dissolved in DCM and the DCM was again evaporated to remove residual EtOH. In case of X = Cl, the excess phosphonates were removed by thoroughly extraction with pentanes. **NOTE:** In case of X = Cl, 4.00 eq. of phosphonates **L1**, **L2**, **L4**, **L5**, **L6** are needed to successfully replace all water ligands in the lanthanide salts.

### 1.2.1 L1, X = $\text{NO}_3$

**1:** Yield: quantitative.  **$^1\text{H-NMR}$**  (400 MHz,  $\text{CD}_2\text{Cl}_2$ ):  $\delta$  = 7.32–7.22 (m, 15H, H2–H6), 4.52–4.61 (m, 6H,  $\text{CH}(\text{CH}_3)_2$ ), 3.08 (d, 6H,  $^2J_{\text{PH}} = 21.6$  Hz,  $\text{CH}_2$ ), 1.27 (d, 18H,  $^3J_{\text{HH}} = 6.2$  Hz,  $\text{CH}(\text{CH}_3)_2$ ), 1.17 (d, 18H,  $^3J_{\text{HH}} = 6.2$  Hz,  $\text{CH}(\text{CH}_3)_2$ ) ppm;  **$^{13}\text{C}\{^1\text{H}\}\text{-NMR}$**  (100 MHz,  $\text{CD}_2\text{Cl}_2$ ):  $\delta$  = 130.9 (d, 3C,  $^2J_{\text{PC}} = 10.1$  Hz, C1), 130.0 (d, 6C,  $^3J_{\text{PC}} = 6.8$  Hz, C2 + C6) 128.6 (d, 6C,  $^4J_{\text{PC}} = 3.2$  Hz, C3 + C5), 127.2 (d, 3C,  $^5J_{\text{PC}} = 3.7$  Hz, C4), 73.4 (d, 6C,  $^2J_{\text{PC}} = 7.6$  Hz,  $\text{CH}(\text{CH}_3)_2$ ), 34.1 (d, 3C,  $^1J_{\text{PC}} = 140.4$  Hz,  $\text{CH}_2$ ), 23.9 (m, 12C,  $\text{CH}(\text{CH}_3)_2$ ) ppm;  **$^{31}\text{P}\{^1\text{H}\}\text{-NMR}$**  (202 MHz,  $\text{CD}_2\text{Cl}_2$ ):  $\delta$  = 23.3 (s) ppm; **IR** (ATR)  $\tilde{\nu}$  = 1164 (P=O), 1098 (P–O<sup>i</sup>Pr)  $\text{cm}^{-1}$ ; **MS (MALDI)**  $m/z$ : 1031.3  $[\text{La}(\text{NO}_3)_2(\text{L1})_3]^+$ , 775.1  $[\text{La}(\text{NO}_3)_2(\text{L1})_2]^+$ ; **Elemental analysis** in % (calculated)  $\text{C}_{39}\text{H}_{63}\text{LaN}_3\text{O}_{18}\text{P}_3$  (1093.75 g/mol): C 65.67 (42.83), H 5.81 (5.81), N 3.78 (3.84).

**2:** Yield: quantitative. **IR** (ATR)  $\tilde{\nu}$  = 1165 (P=O), 1099 (P–O<sup>i</sup>Pr)  $\text{cm}^{-1}$ ; **MS (MALDI)**  $m/z$ : 778.1  $[\text{Nd}(\text{NO}_3)_2(\text{L1})_2]^+$ , 523.3  $[\text{Nd}(\text{NO}_3)_2(\text{L1})]^+$ ; **Elemental analysis** in % (calculated)  $\text{C}_{39}\text{H}_{63}\text{N}_3\text{NdO}_{18}\text{P}_3$  (1099.09 g/mol): C 42.67 (42.62), H 5.73 (5.78), N 3.86 (3.82).

**3:** Yield: quantitative. **IR** (ATR)  $\tilde{\nu}$  = 1169 (P=O), 1099 (P–O<sup>i</sup>Pr)  $\text{cm}^{-1}$ ; **MS (MALDI)**  $m/z$ : 1056.3  $[\text{Dy}(\text{NO}_3)_2(\text{L1})_3]^+$ , 798.2  $[\text{Dy}(\text{NO}_3)_2(\text{L1})_2]^+$ ; **Elemental analysis** in % (calculated)  $\text{C}_{39}\text{H}_{63}\text{N}_3\text{DyO}_{18}\text{P}_3$  (1117.35 g/mol): C 41.97 (41.92), H 5.66 (5.68), N 3.73 (3.76).

**4:** Yield: quantitative. **IR** (ATR)  $\tilde{\nu}$  = 1170 (P=O), 1099 (P–O<sup>i</sup>Pr)  $\text{cm}^{-1}$ ; **MS (MALDI)**  $m/z$ : 1060.4  $[\text{Er}(\text{NO}_3)_2(\text{L1})_3]^+$ , 802.3  $[\text{Er}(\text{NO}_3)_2(\text{L1})_2]^+$ ; **Elemental analysis** in % (calculated)  $\text{C}_{39}\text{H}_{63}\text{N}_3\text{ErO}_{18}\text{P}_3$  (1122.11 g/mol): C 40.51 (41.74), H 5.86 (5.66), N 3.87 (3.74).

### 1.2.2 L1, X = Cl

**5:** Yield: quantitative.  **$^1\text{H-NMR}$**  (500 MHz, acetone- $d_6$ ):  $\delta$  = 7.44–7.41 (m, 6H, H3 + H5), 7.33–7.28 (m, 6H, H2 + H6), 7.26–7.21 (m, 3H, H4), 5.00–4.89 (m, 6H,  $\text{CH}(\text{CH}_3)_2$ ), 3.48 (d, 6H,  $^2J_{\text{PH}} = 22.5$  Hz,  $\text{CH}_2$ ), 1.27 (d, 18H,  $^3J_{\text{HH}} = 6.2$  Hz,  $\text{CH}(\text{CH}_3)_2$ ), 1.23 (d, 18H,  $^3J_{\text{HH}} = 6.2$  Hz,  $\text{CH}(\text{CH}_3)_2$ ) ppm;  **$^{13}\text{C}\{^1\text{H}\}\text{-NMR}$**  (100 MHz, acetone- $d_6$ ):  $\delta$  = 133.1 (d, 3C,  $^2J_{\text{PC}} = 9.9$  Hz, C1), 131.2 (d, 6C,  $^3J_{\text{PC}} = 6.9$  Hz, C2 + C6), 129.3 (d, 6C,  $^4J_{\text{PC}} = 2.9$  Hz, C3 + C5), 127.6 (d, 3C,  $^5J_{\text{PC}} = 3.4$  Hz, C4), 72.9 (d, 6C,  $^2J_{\text{PC}} = 7.0$  Hz,  $\text{CH}(\text{CH}_3)_2$ ), 34.96 (d, 3C,  $^1J_{\text{PC}} = 139.3$  Hz,  $\text{CH}_2$ ), 24.5 (d, 6C,  $^3J_{\text{PC}} = 4.3$  Hz,  $\text{CH}(\text{CH}_3)_2$ ), 24.4 (d, 6C,  $^3J_{\text{PC}} = 4.7$  Hz,  $\text{CH}(\text{CH}_3)_2$ ) ppm;  **$^{31}\text{P}\{^1\text{H}\}\text{-NMR}$**  (202 MHz, acetone- $d_6$ ):  $\delta$  = 24.2 (s) ppm; **IR** (ATR)  $\tilde{\nu}$  = 1165 (P=O), 1103 (P–O<sup>i</sup>Pr)

cm<sup>-1</sup>; **MS (MALDI)** *m/z*: 1467.0 [LaCl<sub>2</sub>(L1)<sub>3</sub> + 2 LaCl<sub>3</sub>]<sup>+</sup>, 1223.2 [LaCl<sub>2</sub>(L1)<sub>3</sub> + LaCl<sub>3</sub>]<sup>+</sup>, 721.2 [LaCl<sub>2</sub>(L1)<sub>2</sub>]<sup>+</sup>; **Elemental analysis** in % (calculated) C<sub>39</sub>H<sub>63</sub>Cl<sub>3</sub>LaO<sub>9</sub>P<sub>3</sub> (1014.10 g/mol): C 46.20 (46.19), H 6.14 (6.26).

**6:** Yield: quantitative. **IR (ATR)**  $\tilde{\nu}$  = 1163 (P=O), 1101 (P–O<sup>*i*</sup>Pr) cm<sup>-1</sup>; **MS (MALDI)** *m/z*: 1484.4 [NdCl<sub>2</sub>(L1)<sub>3</sub> + 2 NdCl<sub>3</sub>]<sup>+</sup>, 726.3 [NdCl<sub>2</sub>(L1)<sub>2</sub>]<sup>+</sup>; **Elemental analysis** in % (calculated) C<sub>39</sub>H<sub>63</sub>Cl<sub>3</sub>NdO<sub>9</sub>P<sub>3</sub> (1019.43 g/mol): C 46.10 (45.95), H 6.52 (6.23).

**7:** Yield: quantitative. **IR (ATR)**  $\tilde{\nu}$  = 1160 (P=O), 1100 (P–O<sup>*i*</sup>Pr) cm<sup>-1</sup>; **MS (MALDI)** *m/z*: 1272.4 [DyCl<sub>2</sub>(L1)<sub>3</sub> + DyCl<sub>3</sub>]<sup>+</sup>, 1002.5 [DyCl<sub>2</sub>(L1)<sub>3</sub>]<sup>+</sup>, 746.3 [DyCl<sub>2</sub>(L1)<sub>2</sub>]<sup>+</sup>; **Elemental analysis** in % (calculated) C<sub>39</sub>H<sub>63</sub>Cl<sub>3</sub>DyO<sub>9</sub>P<sub>3</sub> (251.33 g/mol): C 45.33 (45.14), H 6.28 (6.12).

**8:** Yield: quantitative. **IR (ATR)**  $\tilde{\nu}$  = 1161 (P=O), 1100 (P–O<sup>*i*</sup>Pr) cm<sup>-1</sup>; **MS (MALDI)** *m/z*: 1006.6 [ErCl<sub>2</sub>(L1)<sub>3</sub>]<sup>+</sup>, 750.4 [ErCl<sub>2</sub>(L1)<sub>2</sub>]<sup>+</sup>; **Elemental analysis** in % (calculated) C<sub>14</sub>H<sub>21</sub>NO<sub>3</sub> (251.33 g/mol): C 45.12 (44.93), H 6.19 (6.09).

### 1.2.3 L2, X = NO<sub>3</sub>

**9:** Yield: quantitative. **<sup>1</sup>H-NMR** (400 MHz, CDCl<sub>3</sub>):  $\delta$  = 7.43 (d, 6H, <sup>3</sup>J<sub>HH</sub> = 7.9 Hz, H3 + H5), 7.13 (d, 6H, <sup>3</sup>J<sub>HH</sub> = 6.8 Hz, H2 + H6), 4.76–4.63 (m, 6H, CH(CH<sub>3</sub>)<sub>2</sub>), 3.18 (d, 6H, <sup>2</sup>J<sub>PH</sub> = 21.9 Hz, CH<sub>2</sub>), 1.26 (m, 36H, CH(CH<sub>3</sub>)<sub>2</sub>) ppm; **<sup>13</sup>C{<sup>1</sup>H}-NMR** (100 MHz, CDCl<sub>3</sub>):  $\delta$  = 131.8 (d, 6C, <sup>4</sup>J<sub>PC</sub> = 3.1 Hz, C3 + C5), 131.7 (d, 6C, <sup>3</sup>J<sub>PC</sub> = 6.8 Hz, C2 + C6), 130.0 (d, 3C, <sup>2</sup>J<sub>PC</sub> = 10.3 Hz, C1), 121.3 (d, 3C, <sup>5</sup>J<sub>PC</sub> = 4.9 Hz, C4), 73.6 (d, 6C, <sup>2</sup>J<sub>PC</sub> = 7.7 Hz, CH(CH<sub>3</sub>)<sub>2</sub>), 33.6 (d, 3C, <sup>1</sup>J<sub>PC</sub> = 140.8 Hz, CH<sub>2</sub>), 24.0–23.9 (m, 12C, CH(CH<sub>3</sub>)<sub>2</sub>) ppm; **<sup>31</sup>P{<sup>1</sup>H}-NMR** (202 MHz, CDCl<sub>3</sub>):  $\delta$  = 22.3 (s) ppm; **IR (ATR)**  $\tilde{\nu}$  = 1166 (P=O), 1096 (P–O<sup>*i*</sup>Pr) cm<sup>-1</sup>; **MS (MALDI)** *m/z*: 1269.0 [La(NO<sub>3</sub>)<sub>2</sub>(L2)<sub>3</sub>]<sup>+</sup>, 933.0 [La(NO<sub>3</sub>)<sub>2</sub>(L2)<sub>2</sub>]<sup>+</sup>; **Elemental analysis** in % (calculated) C<sub>39</sub>H<sub>60</sub>Br<sub>3</sub>LaN<sub>3</sub>O<sub>18</sub>P<sub>3</sub> (1330.44 g/mol): C 35.26 (35.21), H 4.62 (4.55), N 3.08 (3.16).

**10:** Yield: quantitative. **IR (ATR)**  $\tilde{\nu}$  = 1163 (P=O), 1095 (P–O<sup>*i*</sup>Pr) cm<sup>-1</sup>; **MS (MALDI)** *m/z*: 938.0 [Nd(NO<sub>3</sub>)<sub>2</sub>(L2)<sub>2</sub>]<sup>+</sup>; **Elemental analysis** in % (calculated) C<sub>39</sub>H<sub>60</sub>Br<sub>3</sub>NdN<sub>3</sub>O<sub>18</sub>P<sub>3</sub> (1335.78 g/mol): C 35.32 (35.07), H 4.57 (4.53), N 3.19 (3.15).

**11:** Yield: quantitative. **IR (ATR)**  $\tilde{\nu}$  = 1168 (P=O), 1095 (P–O<sup>*i*</sup>Pr) cm<sup>-1</sup>; **MS (MALDI)** *m/z*: 1292.0 [Dy(NO<sub>3</sub>)<sub>2</sub>(L2)<sub>3</sub>]<sup>+</sup>, 958.0 [Dy(NO<sub>3</sub>)<sub>2</sub>(L2)<sub>2</sub>]<sup>+</sup>; **Elemental analysis** in % (calculated) C<sub>39</sub>H<sub>60</sub>Br<sub>3</sub>DyN<sub>3</sub>O<sub>18</sub>P<sub>3</sub> (1354.04 g/mol): C 34.57 (34.59), H 4.56 (4.47), N 3.14 (3.10).

**12:** Yield: quantitative. **IR (ATR)**  $\tilde{\nu}$  = 1171 (P=O), 1097 (P–O<sup>*i*</sup>Pr) cm<sup>-1</sup>; **MS (MALDI)** *m/z*: 1296.2 [Er(NO<sub>3</sub>)<sub>2</sub>(L2)<sub>3</sub>]<sup>+</sup>, 960.2 [Er(NO<sub>3</sub>)<sub>2</sub>(L2)<sub>2</sub>]<sup>+</sup>; **Elemental analysis** in % (calculated) C<sub>39</sub>H<sub>60</sub>Br<sub>3</sub>ErN<sub>3</sub>O<sub>18</sub>P<sub>3</sub> (1358.80 g/mol): C 34.70 (34.47), H 4.71 (4.45), N 3.04 (3.09).

### 1.2.4 L2, X = Cl

**13:** Yield: quantitative. **<sup>1</sup>H-NMR** (400 MHz, CDCl<sub>3</sub>):  $\delta$  = 7.39 (d, 6H, <sup>3</sup>J<sub>HH</sub> = 8.3 Hz, H3 + H5), 7.20 (dd, 6H, <sup>3</sup>J<sub>HH</sub> = 8.4, <sup>4</sup>J<sub>HH</sub> = 2.5 Hz, H2 + H6), 4.93–4.80 (m, 6H, CH(CH<sub>3</sub>)<sub>2</sub>), 3.31 (d, 6H, <sup>2</sup>J<sub>PH</sub> = 22.3 Hz, CH<sub>2</sub>), 1.26 (d, 18H, <sup>3</sup>J<sub>HH</sub> = 6.2 Hz, CH(CH<sub>3</sub>)<sub>2</sub>), 1.22 (d, 18H, <sup>3</sup>J<sub>HH</sub> = 6.2 Hz, CH(CH<sub>3</sub>)<sub>2</sub>) ppm; **<sup>13</sup>C{<sup>1</sup>H}-NMR** (100 MHz, CDCl<sub>3</sub>):  $\delta$  = 131.8 (d, 6C, <sup>3</sup>J<sub>PC</sub> = 6.8 Hz, C2 + C6), 131.6 (d, 6C, <sup>4</sup>J<sub>PC</sub> = 3.1 Hz, C3 + C5), 130.8 (d, 3C, <sup>2</sup>J<sub>PC</sub> = 10.3 Hz, C1), 120.9 (d, 3C, <sup>5</sup>J<sub>PC</sub> = 4.7 Hz, C4), 72.5 (d, 6C, <sup>2</sup>J<sub>PC</sub> = 7.2 Hz, CH(CH<sub>3</sub>)<sub>2</sub>), 33.9 (d, 3C, <sup>1</sup>J<sub>PC</sub> = 140.1 Hz, CH<sub>2</sub>), 24.1 (d, 6C, <sup>3</sup>J<sub>PC</sub> = 3.8 Hz, CH(CH<sub>3</sub>)<sub>2</sub>), 24.0 (d, 6C, <sup>3</sup>J<sub>PC</sub> = 5.2 Hz, CH(CH<sub>3</sub>)<sub>2</sub>) ppm; **<sup>31</sup>P{<sup>1</sup>H}-NMR** (202 MHz, CDCl<sub>3</sub>):  $\delta$  = 23.2 (s) ppm; **IR (ATR)**  $\tilde{\nu}$  = 1165 (P=O), 1097 (P–O<sup>*i*</sup>Pr) cm<sup>-1</sup>;

**MS (MALDI)  $m/z$ :** 1705.3 [LaCl<sub>2</sub>(L2)<sub>3</sub> + 2 LaCl<sub>3</sub>]<sup>+</sup>, 1461.2 [LaCl<sub>2</sub>(L2)<sub>3</sub> + LaCl<sub>3</sub>]<sup>+</sup>, 1215.3 [LaCl<sub>2</sub>(L2)<sub>3</sub>]<sup>+</sup>, 879.2 [LaCl<sub>2</sub>(L2)<sub>2</sub>]<sup>+</sup>; **Elemental analysis** in % (calculated) C<sub>39</sub>H<sub>60</sub>Br<sub>3</sub>LaO<sub>9</sub>P<sub>3</sub> (1250.79 g/mol): C 39.53 (37.45), H 4.89 (4.84).

**14:** Yield: quantitative. **IR (ATR)  $\tilde{\nu}$**  = 1167 (P=O), 1097 (P–O<sup>*i*</sup>Pr) cm<sup>-1</sup>; **MS (MALDI)  $m/z$ :** 1722.3 [NdCl<sub>2</sub>(L2)<sub>3</sub> + 2 NdCl<sub>3</sub>]<sup>+</sup>, 1470.2 [NdCl<sub>2</sub>(L2)<sub>3</sub> + NdCl<sub>3</sub>]<sup>+</sup>, 1218.3 [NdCl<sub>2</sub>(L2)<sub>3</sub>]<sup>+</sup>, 884.2 [NdCl<sub>2</sub>(L2)<sub>2</sub>]<sup>+</sup>; **Elemental analysis** in % (calculated) C<sub>39</sub>H<sub>60</sub>Br<sub>3</sub>NdO<sub>9</sub>P<sub>3</sub> (1256.12 g/mol): C 39.28 (37.29), H 4.81 (4.81).

**15:** Yield: quantitative. **IR (ATR)  $\tilde{\nu}$**  = 1163 (P=O), 1096 (P–O<sup>*i*</sup>Pr) cm<sup>-1</sup>; **MS (MALDI)  $m/z$ :** 1507.3 [DyCl<sub>2</sub>(L2)<sub>3</sub> + DyCl<sub>3</sub>]<sup>+</sup>, 1238.3 [DyCl<sub>2</sub>(L2)<sub>3</sub>]<sup>+</sup>, 904.2 [DyCl<sub>2</sub>(L2)<sub>2</sub>]<sup>+</sup>; **Elemental analysis** in % (calculated) C<sub>39</sub>H<sub>60</sub>Br<sub>3</sub>DyO<sub>9</sub>P<sub>3</sub> (1274.38 g/mol): C 38.83 (36.76), H 4.82 (4.75).

**16:** Yield: quantitative. **IR (ATR)  $\tilde{\nu}$**  = 1164 (P=O), 1096 (P–O<sup>*i*</sup>Pr) cm<sup>-1</sup>; **MS (MALDI)  $m/z$ :** 1516.3 [ErCl<sub>2</sub>(L2)<sub>3</sub> + ErCl<sub>3</sub>]<sup>+</sup>, 1244.3 [ErCl<sub>2</sub>(L2)<sub>3</sub>]<sup>+</sup>, 908.3 [ErCl<sub>2</sub>(L2)<sub>2</sub>]<sup>+</sup>; **Elemental analysis** in % (calculated) C<sub>39</sub>H<sub>60</sub>Br<sub>3</sub>ErO<sub>9</sub>P<sub>3</sub> (1279.14 g/mol): C 37.78 (36.62), H 4.73 (4.73).

### 1.2.5 L3, X = Cl

**17:** Yield: quantitative. **<sup>1</sup>H-NMR** (500 MHz, CDCl<sub>3</sub>):  $\delta$  = 8.51 (d, 6H, <sup>3</sup>J<sub>HH</sub> = 8.7 Hz, H4 + H8), 8.37 (d, 6H, <sup>3</sup>J<sub>HH</sub> = 9.2 Hz, H1 + H5), 7.58–7.46 (m, 12H, H2 + H6, H3 + H7), 4.83–4.59 (m, 6H, CH(CH<sub>3</sub>)<sub>2</sub>), 4.36 (d, 6H, <sup>2</sup>J<sub>PH</sub> = 22.8 Hz, CH<sub>2</sub>), 1.16 (d, 18H, <sup>3</sup>J<sub>HH</sub> = 6.1 Hz, CH(CH<sub>3</sub>)<sub>2</sub>), 0.98 (d, 18H, <sup>3</sup>J<sub>HH</sub> = 6.1 Hz, CH(CH<sub>3</sub>)<sub>2</sub>) ppm; **<sup>13</sup>C{<sup>1</sup>H}-NMR** (100 MHz, C<sub>6</sub>D<sub>6</sub>):  $\delta$  = 131.3 (d, 6C, <sup>4</sup>J<sub>PC</sub> = 6.8 Hz, C13 + C14), 130.4 (d, 3C, <sup>5</sup>J<sub>PC</sub> = 4.4 Hz, C10), 128.2 (d, 6C, <sup>6</sup>J<sub>PC</sub> = 1.5 Hz, C3 + C7), 126.7 (d, 6C, <sup>5</sup>J<sub>PC</sub> = 1.7 Hz, C4 + C8), 126.4 (d, 6C, <sup>4</sup>J<sub>PC</sub> = 3.2 Hz, C1 + C5), 125.9 (d, 3C, <sup>2</sup>J<sub>PC</sub> = 11.5 Hz, C9), 125.7 (d, 6C, <sup>5</sup>J<sub>PC</sub> = 2.0 Hz, C2 + C6), 123.2 (d, 6C, <sup>3</sup>J<sub>PC</sub> = 7.9 Hz, C11 + C12), 70.9 (d, 6C, <sup>2</sup>J<sub>PC</sub> = 7.1 Hz, CH(CH<sub>3</sub>)<sub>2</sub>), 28.6 (d, 3C, <sup>1</sup>J<sub>PC</sub> = 141.2 Hz, CH<sub>2</sub>), 23.7 (d, 6C, <sup>3</sup>J<sub>PC</sub> = 3.5 Hz, CH(CH<sub>3</sub>)<sub>2</sub>), 23.3 (d, 6C, <sup>3</sup>J<sub>PC</sub> = 5.4 Hz, CH(CH<sub>3</sub>)<sub>2</sub>) ppm; **<sup>31</sup>P{<sup>1</sup>H}-NMR** (202 MHz, CDCl<sub>3</sub>):  $\delta$  = 23.0 ppm (s); **IR (ATR)  $\tilde{\nu}$**  = 1160 (P=O), 1099 (P–O<sup>*i*</sup>Pr) cm<sup>-1</sup>; **Elemental analysis** in % (calculated) C<sub>63</sub>H<sub>72</sub>Br<sub>3</sub>Cl<sub>3</sub>LaO<sub>9</sub>P<sub>3</sub> (1551.14 g/mol): C 48.84 (48.78), H 4.80 (4.68).

**18:** Yield: quantitative. **IR (ATR)  $\tilde{\nu}$**  = 1154 (P=O), 1096 (P–O<sup>*i*</sup>Pr) cm<sup>-1</sup>; **Elemental analysis** in % (calculated) C<sub>63</sub>H<sub>72</sub>Br<sub>3</sub>Cl<sub>3</sub>NdO<sub>9</sub>P<sub>3</sub> (1556.48 g/mol): C 48.31 (48.61), H 4.77 (4.66).

**19:** Yield: quantitative. **IR (ATR)  $\tilde{\nu}$**  = 1153 (P=O), 1095 (P–O<sup>*i*</sup>Pr) cm<sup>-1</sup>; **Elemental analysis** in % (calculated) C<sub>63</sub>H<sub>72</sub>Br<sub>3</sub>Cl<sub>3</sub>DyO<sub>9</sub>P<sub>3</sub> (1574.73 g/mol): C 48.31 (48.16), H 4.66 (4.61).

**20:** Yield: quantitative. **IR (ATR)  $\tilde{\nu}$**  = 1154 (P=O), 1095 (P–O<sup>*i*</sup>Pr) cm<sup>-1</sup>; **Elemental analysis** in % (calculated) C<sub>63</sub>H<sub>72</sub>Br<sub>3</sub>Cl<sub>3</sub>ErO<sub>9</sub>P<sub>3</sub> (1579.49 g/mol): C 47.55 (47.91), H 4.76 (4.59).

### 1.2.6 L4, X = Cl

**21:** Br ↔ Cl exchange (2:1) occurred between the ligand and the lanthanide salt. **<sup>1</sup>H-NMR** (400 MHz, CDCl<sub>3</sub>):  $\delta$  = 7.37–7.27 (m, 12H, H2 + H6, H3 + H5; H2 + H6, H3 + H5), 4.99–4.86 (m, 6H, CH(CH<sub>3</sub>)<sub>2</sub>; CH(CH<sub>3</sub>)<sub>2</sub>), 4.53 (s, 2H, CH<sub>2</sub>–Cl), 4.44 (s, 4H, CH<sub>2</sub>–Br), 3.43 (d, 6H, <sup>2</sup>J<sub>PH</sub> = 22.2 Hz, CH<sub>2</sub>–P; CH<sub>2</sub>–P), 1.28 (d, 18H, <sup>3</sup>J<sub>HH</sub> = 6.1 Hz, CH(CH<sub>3</sub>)<sub>2</sub>; CH(CH<sub>3</sub>)<sub>2</sub>), 1.24 (d, 18H, <sup>3</sup>J<sub>HH</sub> = 6.0 Hz, CH(CH<sub>3</sub>)<sub>2</sub>; CH(CH<sub>3</sub>)<sub>2</sub>) ppm; **<sup>13</sup>C{<sup>1</sup>H}-NMR** (100 MHz, CDCl<sub>3</sub>):  $\delta$  = 136.6 (d, 2C, <sup>5</sup>J<sub>PC</sub> = 3.9 Hz, C4), 136.2 (d, 1C, <sup>5</sup>J<sub>PC</sub> = 3.8 Hz, C4), 131.8 (d, 2C, <sup>2</sup>J<sub>PC</sub> = 9.7 Hz, C1), 131.8 (d, 1C, <sup>2</sup>J<sub>PC</sub> = 9.4 Hz, C1), 130.6–130.5 (m, 6C, C2 + C6; C2 + C6), 129.3 (d, 4C, <sup>4</sup>J<sub>PC</sub> = 3.2 Hz, C3 + C5), 128.8 (d, 2C, <sup>4</sup>J<sub>PC</sub> = 3.2 Hz, C3 + C5), 73.0 (s<sub>br</sub>, 6C, CH(CH<sub>3</sub>)<sub>2</sub>, CH(CH<sub>3</sub>)<sub>2</sub>), 46.1 (s,

1C, CH<sub>2</sub>-Cl), 34.2 (d, 3C, <sup>1</sup>J<sub>PC</sub> = 139.7 Hz, CH<sub>2</sub>-P; CH<sub>2</sub>-P), 33.4 (s, 2C, CH<sub>2</sub>-Br), 24.2 (d, 6C, <sup>3</sup>J<sub>PC</sub> = 3.8 Hz, CH(CH<sub>3</sub>)<sub>2</sub>, CH(CH<sub>3</sub>)<sub>2</sub>), 24.1 (d, 6C, <sup>3</sup>J<sub>PC</sub> = 5.3 Hz, CH(CH<sub>3</sub>)<sub>2</sub>, CH(CH<sub>3</sub>)<sub>2</sub>) ppm; **<sup>31</sup>P{<sup>1</sup>H}-NMR** (202 MHz, CDCl<sub>3</sub>): δ = 23.73 (s, P), 23.67 (s,P) ppm; **IR** (ATR)  $\tilde{\nu}$  = 1165 (P=O; P=O), 1098 (P-O<sup>i</sup>Pr; P-O<sup>i</sup>Pr) cm<sup>-1</sup>; **MS (MALDI)** *m/z*: 1468.6 [LaClBr(L4)<sub>2</sub>(L4 - Br) + LaCl<sub>3</sub>]<sup>+</sup>, 1424.7 [LaCl<sub>2</sub>(L4)<sub>2</sub>(L4 - Br) + LaCl<sub>3</sub>]<sup>+</sup>, 996.8 [LaBr<sub>2</sub>(L4)<sub>2</sub>]<sup>+</sup>, 952.9 [LaClBr(L4)<sub>2</sub>]<sup>+</sup>; **Elemental analysis** in % (calculated) C<sub>42</sub>H<sub>66</sub>Br<sub>3</sub>Cl<sub>3</sub>LaO<sub>9</sub>P<sub>3</sub> (1292.87 g/mol): C 39.16 (39.02), H 5.33 (5.15).

**22: IR** (ATR)  $\tilde{\nu}$  = 1160 (P=O; P=O), 1096 (P-O<sup>i</sup>Pr; P-O<sup>i</sup>Pr) cm<sup>-1</sup>; **MS (MALDI)** *m/z*: 1306.0 [NdClBr(L4)<sub>3</sub>]<sup>+</sup>, 1262.0 [NdCl<sub>2</sub>(L4)<sub>3</sub>]<sup>+</sup>, 958.0 [NdClBr(L4)<sub>2</sub>]<sup>+</sup>, 912.0 [NdCl<sub>2</sub>(L4)<sub>2</sub>]<sup>+</sup>; **Elemental analysis** in % (calculated) C<sub>42</sub>H<sub>66</sub>Br<sub>3</sub>Cl<sub>3</sub>NdO<sub>9</sub>P<sub>3</sub> (1298.20 g/mol): C 39.68 (38.86), H 5.43 (5.12).

**23: IR** (ATR)  $\tilde{\nu}$  = 1158 (P=O; P=O), 1096 (P-O<sup>i</sup>Pr; P-O<sup>i</sup>Pr) cm<sup>-1</sup>; **MS (MALDI)** *m/z*: 1370.0 [DyBr<sub>2</sub>(L4)<sub>3</sub>]<sup>+</sup>, 1326.0 [DyClBr(L4)<sub>3</sub>]<sup>+</sup>, 1280.1 [DyCl<sub>2</sub>(L4)<sub>3</sub>]<sup>+</sup>, 1236.1 [DyCl<sub>2</sub>(L4)<sub>2</sub>(L4)]<sup>+</sup>, 976.0 [DyClBr(L4)<sub>2</sub>]<sup>+</sup>, 932.0 [DyCl<sub>2</sub>(L4)<sub>2</sub>]<sup>+</sup>; **Elemental analysis** in % (calculated) C<sub>42</sub>H<sub>66</sub>Br<sub>3</sub>Cl<sub>3</sub>DyO<sub>9</sub>P<sub>3</sub> (1316.46 g/mol): C 38.44 (38.32), H 5.27 (5.05).

**24: IR** (ATR)  $\tilde{\nu}$  = 1160 (P=O; P=O), 1096 (P-O<sup>i</sup>Pr; P-O<sup>i</sup>Pr) cm<sup>-1</sup>; **MS (MALDI)** *m/z*: 1374.0 [ErBr<sub>2</sub>(L4)<sub>3</sub>]<sup>+</sup>, 1330.1 [ErClBr(L4)<sub>3</sub>]<sup>+</sup>, 1284.1 [ErCl<sub>2</sub>(L4)<sub>3</sub>]<sup>+</sup>, 1240.2 [ErBr<sub>2</sub>(L4)<sub>3</sub>]<sup>+</sup>, 980.0 [ErClBr(L4)<sub>2</sub>]<sup>+</sup>, 935.0 [ErCl<sub>2</sub>(L4)<sub>2</sub>]<sup>+</sup>; **Elemental analysis** in % (calculated) C<sub>42</sub>H<sub>66</sub>Br<sub>3</sub>Cl<sub>3</sub>ErO<sub>9</sub>P<sub>3</sub> (1321.22 g/mol): C 39.68 (38.18), H 5.40 (5.03).

### 1.2.7 L5, X = Cl

**25: <sup>1</sup>H-NMR** (400 MHz, CDCl<sub>3</sub>): δ = 7.54–7.35 (m, 24H, H<sub>2</sub> + H<sub>6</sub>; H<sub>2</sub>' + H<sub>6</sub>'; H<sub>3</sub> + H<sub>5</sub>; H<sub>3</sub>' + H<sub>5</sub>'), 4.92–4.75 (m, 6H, CH(CH<sub>3</sub>)<sub>2</sub>), 3.33 (d, 6H, <sup>2</sup>J<sub>PH</sub> = 21.8 Hz, CH<sub>2</sub>), 1.29 (d, 18H, <sup>3</sup>J<sub>HH</sub> = 6.0 Hz, CH(CH<sub>3</sub>)<sub>2</sub>), 1.24 (d, 18H, <sup>3</sup>J<sub>HH</sub> = 6.0 Hz, CH(CH<sub>3</sub>)<sub>2</sub>) ppm; **<sup>13</sup>C{<sup>1</sup>H}-NMR** (100 MHz, CDCl<sub>3</sub>): δ = 139.7–139.6 (m, 3C, C1'), 138.4 (d, 3C, <sup>5</sup>J<sub>PC</sub> = 3.5 Hz, C1), 131.9 (s, 6C, C3' + C5'), 131.3 (d, 3C, <sup>2</sup>J<sub>PC</sub> = 9.3 Hz, C4), 130.6 (d, 6C, <sup>3</sup>J<sub>PC</sub> = 6.8 Hz, C3 + C5), 128.6 (s, 6C, C2' + C6'), 126.9 (d, 6C, <sup>4</sup>J<sub>PC</sub> = 2.9 Hz, C2 + C6), 121.5 (s, 3C, C4'), 72.2–71.7 (m, 3C, CH(CH<sub>3</sub>)<sub>2</sub>), 34.3 (d, 3C, <sup>1</sup>J<sub>PC</sub> = 139.9 Hz, CH<sub>2</sub>), 24.2 (d, 6C, <sup>3</sup>J<sub>PC</sub> = 3.7 Hz, CH(CH<sub>3</sub>)<sub>2</sub>), 24.0 (d, 6C, <sup>3</sup>J<sub>PC</sub> = 5.2 Hz, CH(CH<sub>3</sub>)<sub>2</sub>) ppm; **<sup>31</sup>P{<sup>1</sup>H}-NMR** (202 MHz, CDCl<sub>3</sub>): δ = 24.0 (s) ppm; **IR** (ATR)  $\tilde{\nu}$  = 1142 (P=O), 1100 (P-O<sup>i</sup>Pr) cm<sup>-1</sup>; **MS (MALDI)** *m/z*: 1364.8 [LaCl<sub>2</sub>(L5)<sub>3</sub>-Br]<sup>+</sup>, 1030.9 [LaCl<sub>2</sub>(L5)<sub>2</sub>]<sup>+</sup>; **Elemental analysis** in % (calculated) C<sub>57</sub>H<sub>72</sub>Br<sub>3</sub>Cl<sub>3</sub>LaO<sub>9</sub>P<sub>3</sub> (1479.07 g/mol): C 46.62 (46.29), H 5.02 (4.91).

**26: IR** (ATR)  $\tilde{\nu}$  = 1142 (P=O), 1099 (P-O<sup>i</sup>Pr) cm<sup>-1</sup>; **MS (MALDI)** *m/z*: 1036.0 [NdCl<sub>2</sub>(L5)<sub>2</sub>]<sup>+</sup>; **Elemental analysis** in % (calculated) C<sub>57</sub>H<sub>72</sub>Br<sub>3</sub>Cl<sub>3</sub>NdO<sub>9</sub>P<sub>3</sub> (1484.41 g/mol): C 46.46 (46.12), H 5.61 (4.86).

**27: IR** (ATR)  $\tilde{\nu}$  = 1143 (P=O), 1099 (P-O<sup>i</sup>Pr) cm<sup>-1</sup>; **MS (MALDI)** *m/z*: 1467.2 [DyCl<sub>2</sub>(L5)<sub>3</sub>]<sup>+</sup>, 1056.0 [DyCl<sub>2</sub>(L5)<sub>2</sub>]<sup>+</sup>; **Elemental analysis** in % (calculated) C<sub>57</sub>H<sub>72</sub>Br<sub>3</sub>Cl<sub>3</sub>DyO<sub>9</sub>P<sub>3</sub> (1502.67 g/mol): C 46.65 (45.56), H 5.37 (4.83).

**28: IR** (ATR)  $\tilde{\nu}$  = 1143 (P=O), 1099 (P-O<sup>i</sup>Pr) cm<sup>-1</sup>; **MS (MALDI)** *m/z*: 1470.1 [ErCl<sub>2</sub>(L5)<sub>3</sub>]<sup>+</sup>, 1060.0 [ErCl<sub>2</sub>(L5)<sub>2</sub>]<sup>+</sup>; **Elemental analysis** in % (calculated) C<sub>57</sub>H<sub>72</sub>Br<sub>3</sub>Cl<sub>3</sub>ErO<sub>9</sub>P<sub>3</sub> (1507.43 g/mol): C 45.53 (45.42), H 5.12 (4.81).

### 1.2.8 L6, X = Cl

**29:**  $^1\text{H-NMR}$  (400 MHz,  $\text{CDCl}_3$ ):  $\delta$  = 4.98–4.85 (m, 6H,  $\text{CH}(\text{CH}_3)_2$ ), 3.53 (d, 6H,  $^2J_{\text{PH}} = 22.2$  Hz,  $\text{CH}_2$ ), 1.30 (d, 18H,  $^3J_{\text{HH}} = 6.2$  Hz,  $\text{CH}(\text{CH}_3)_2$ ), 1.27 (d, 18H,  $^3J_{\text{HH}} = 6.1$  Hz,  $\text{CH}(\text{CH}_3)_2$ ) ppm;  $^{13}\text{C}\{^1\text{H}\}\text{-NMR}$  (100 MHz,  $\text{THF-d}_8$ ):  $\delta$  = 147.8–146.9 (m, 2C, C3 + C5), 145.3–144.5 (m, 2C, C2 + C6), 114.0 (td, 1C,  $^2J_{\text{FC}} = 18.5$ ,  $^2J_{\text{PC}} = 10.9$  Hz, C1), 98.9 (td, 1C,  $^2J_{\text{FC}} = 22.8$ ,  $^5J_{\text{PC}} = 5.4$  Hz, C4), 73.1 (d, 2C,  $^2J_{\text{PC}} = 6.8$  Hz,  $\text{CH}(\text{CH}_3)_2$ ), 24.4 (d, 2C,  $^3J_{\text{PC}} = 3.7$  Hz,  $\text{CH}(\text{CH}_3)_2$ ), 24.2 (d, 2C,  $^3J_{\text{PC}} = 5.3$  Hz,  $\text{CH}(\text{CH}_3)_2$ ), 23.9 (d, 1C,  $^1J_{\text{PC}} = 143.1$  Hz,  $\text{CH}_2$ ) ppm;  $^{19}\text{F-NMR}$  (375 MHz,  $\text{THF-d}_8$ ):  $\delta$  = -134.5– -134.6 (m, 2F, F3 + F5), -138.3– -138.4 (m, 2F, F2 + F6) ppm;  $^{31}\text{P}\{^1\text{H}\}\text{-NMR}$  (202 MHz,  $\text{THF-d}_8$ ):  $\delta$  = 19.0 (s) ppm; **IR** (ATR)  $\tilde{\nu}$  = 1145 (P=O), 1099 (P–O<sup>i</sup>Pr)  $\text{cm}^{-1}$ ; **MS (MALDI)**  $m/z$ : 1920.4 [ $\text{LaCl}_2(\text{L5})_3 + 2 \text{LaCl}_3$ ]<sup>+</sup>, 1674.6 [ $\text{LaCl}_2(\text{L5})_3 + \text{LaCl}_3$ ]<sup>+</sup>; **Elemental analysis** in % (calculated)  $\text{C}_{39}\text{H}_{48}\text{Br}_3\text{Cl}_3\text{F}_{12}\text{LaO}_9\text{P}_3$  (1466.67 g/mol): C 29.70 (31.94), H 3.30 (3.19).

For complexes **30–32** also species carrying **L6** with a Cl instead of a Br at the para position were detected in the MALDI spectra.

**30:** **IR** (ATR)  $\tilde{\nu}$  = 1145 (P=O), 1099 (P–O<sup>i</sup>Pr)  $\text{cm}^{-1}$ ; **MS (MALDI)**  $m/z$ : 1236.0 [ $\text{NdCl}_2(\text{L6})(\text{L6-Cl}) + \text{NdCl}_3$ ]<sup>+</sup>, 986.2 [ $\text{NdCl}_2(\text{L6})(\text{L6-Cl})$ ]<sup>+</sup>; **Elemental analysis** in % (calculated)  $\text{C}_{39}\text{H}_{48}\text{Br}_3\text{Cl}_3\text{F}_{12}\text{NdO}_9\text{P}_3$  (1472.01 g/mol): C 31.95 (31.82), H 3.35 (3.29).

**31:** **IR** (ATR)  $\tilde{\nu}$  = 1145 (P=O), 1099 (P–O<sup>i</sup>Pr)  $\text{cm}^{-1}$ ; **MS (MALDI)**  $m/z$ : 1274.1 [ $\text{DyCl}_2(\text{L6})(\text{L6-Cl}) + \text{DyCl}_3$ ]<sup>+</sup>, 1006.2 [ $\text{DyCl}_2(\text{L6})(\text{L6-Cl})$ ]<sup>+</sup>; **Elemental analysis** in % (calculated)  $\text{C}_{39}\text{H}_{48}\text{Br}_3\text{Cl}_3\text{F}_{12}\text{DyO}_9\text{P}_3$  (1490.27 g/mol): C 31.67 (31.43), H 3.55 (3.25).

**32:** **IR** (ATR)  $\tilde{\nu}$  = 1144 (P=O), 1101 (P–O<sup>i</sup>Pr)  $\text{cm}^{-1}$ ; **MS (MALDI)**  $m/z$ : 1284.1 [ $\text{ErCl}_2(\text{L6})(\text{L6-Cl}) + \text{ErCl}_3$ ]<sup>+</sup>, 1010.3 [ $\text{ErCl}_2(\text{L6})(\text{L6-Cl})$ ]<sup>+</sup>; **Elemental analysis** in % (calculated)  $\text{C}_{39}\text{H}_{48}\text{Br}_3\text{Cl}_3\text{F}_{12}\text{ErO}_9\text{P}_3$  (1495.03 g/mol): C 32.17 (31.33), H 3.72 (3.24).



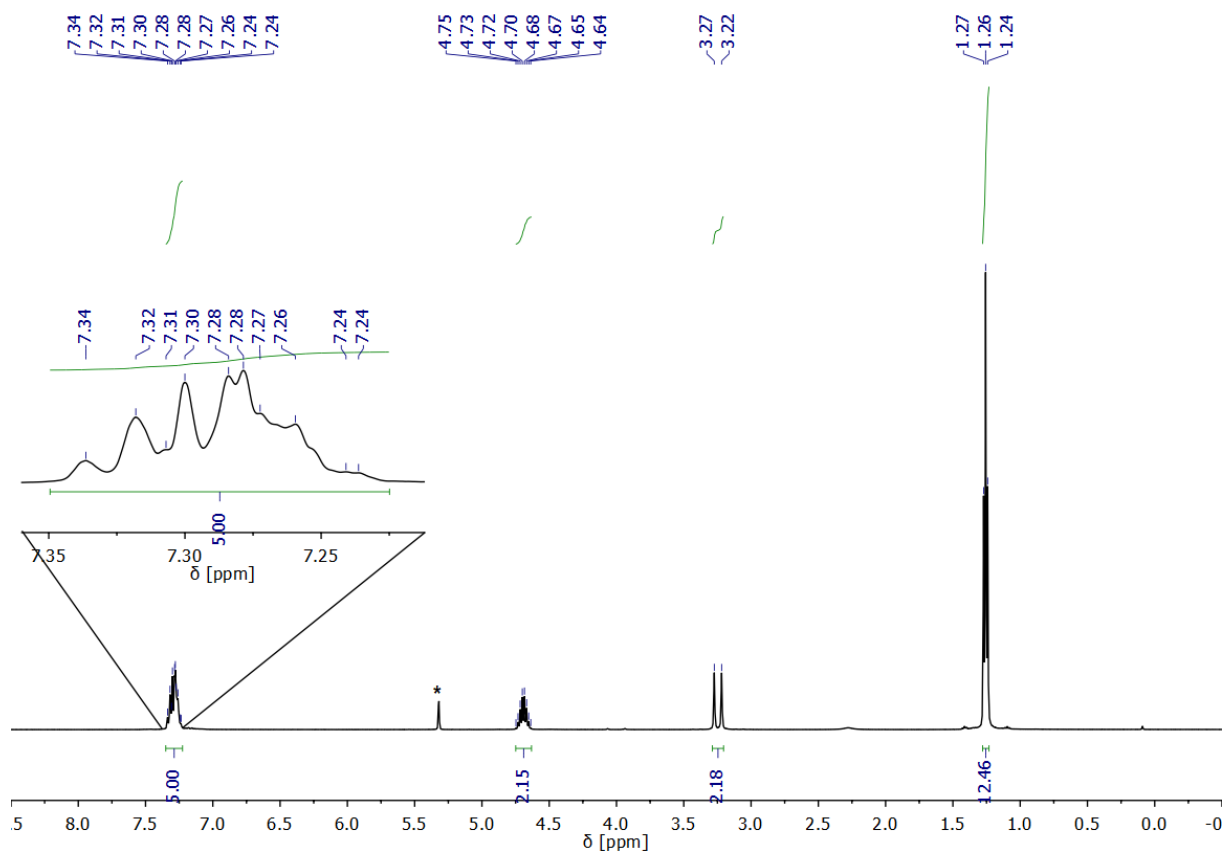

Figure 23:  $^1\text{H-NMR}$  spectrum of **1** in  $\text{CD}_2\text{Cl}_2$  (\*).

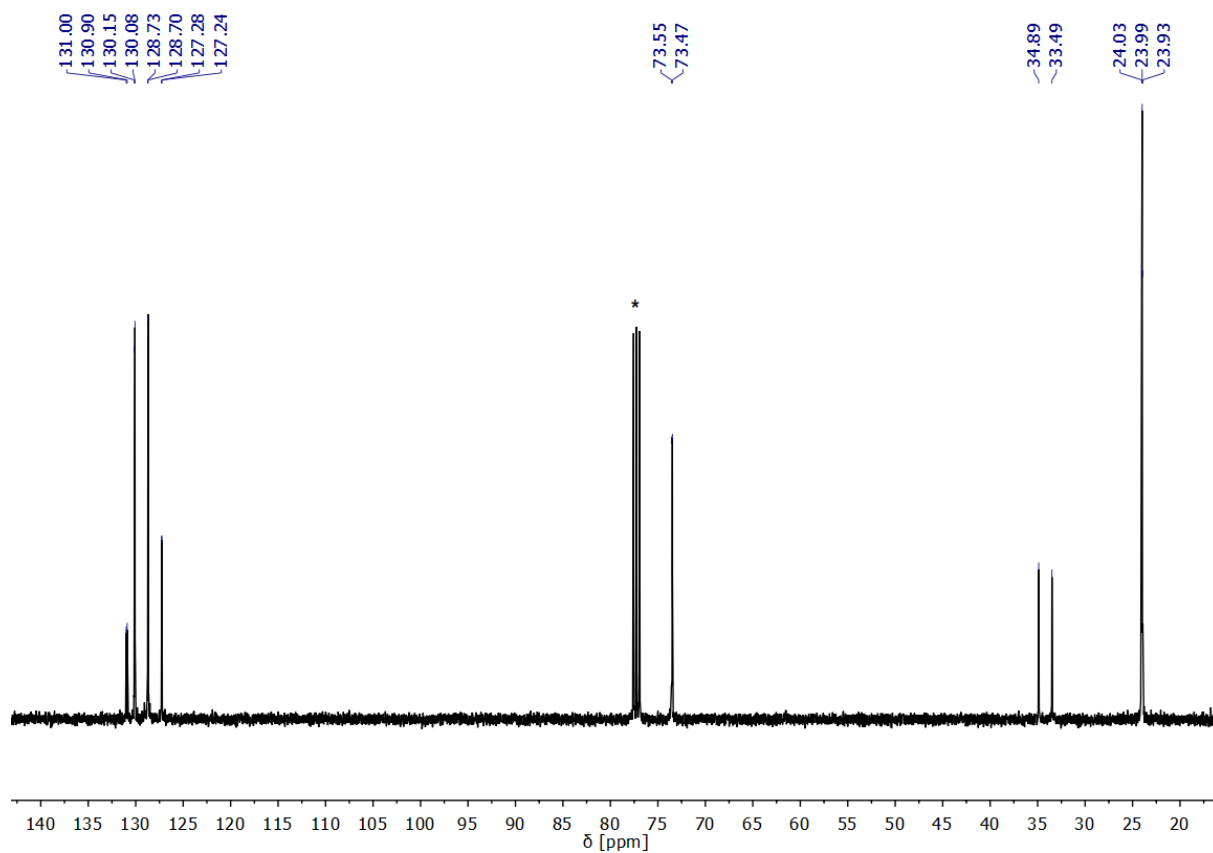

Figure 24:  $^{13}\text{C-NMR}$  spectrum of **1** in  $\text{CDCl}_3$  (\*).

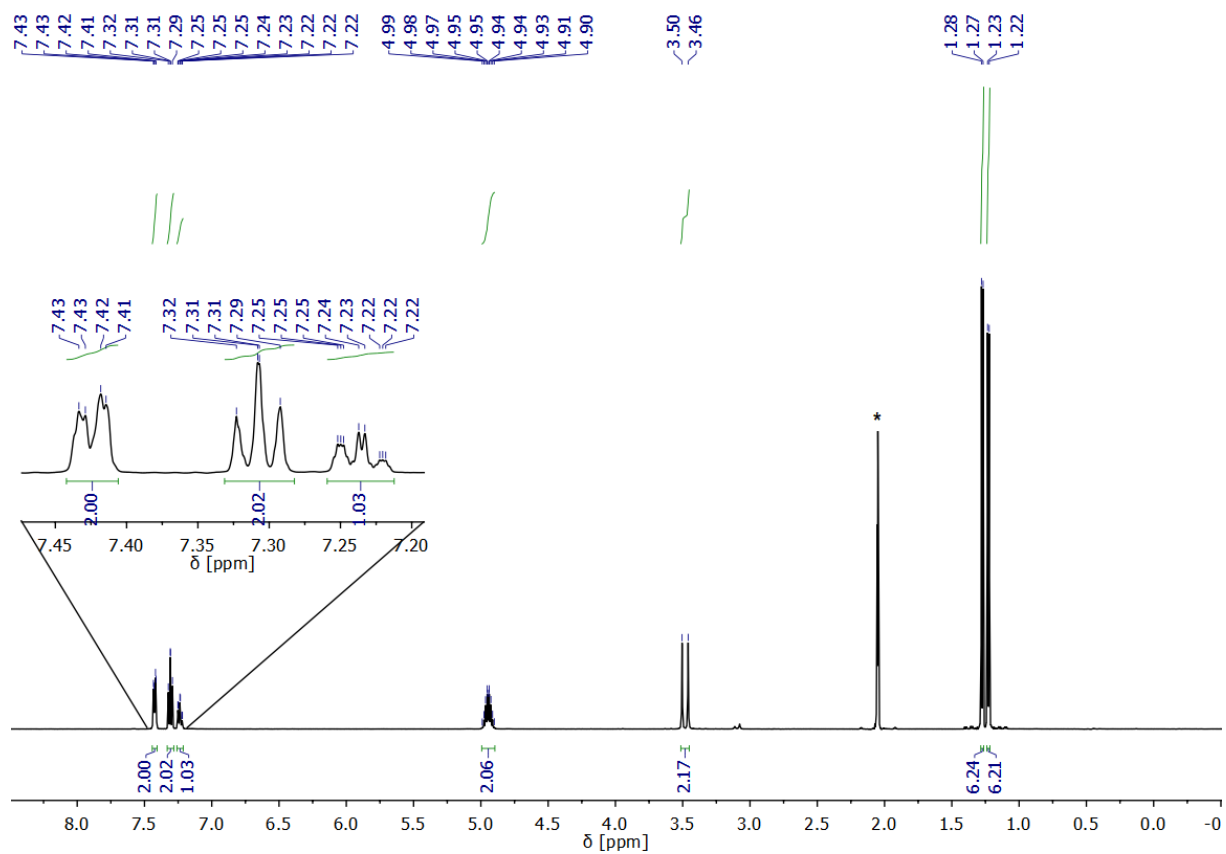

Figure 25:  $^1\text{H-NMR}$  spectrum of **5** in acetone- $\text{d}_6$  (\*).

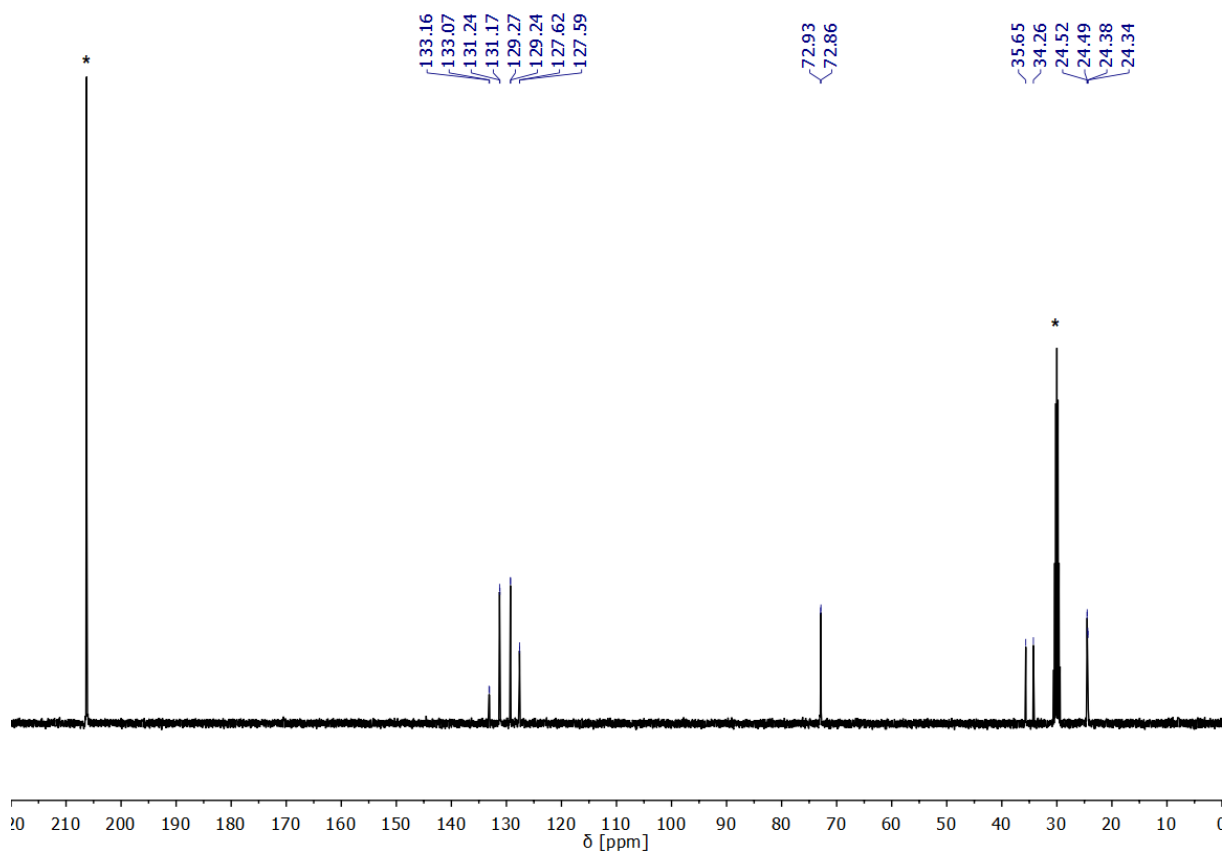

Figure 26:  $^{13}\text{C-NMR}$  spectrum of **5** in acetone- $\text{d}_6$  (\*).

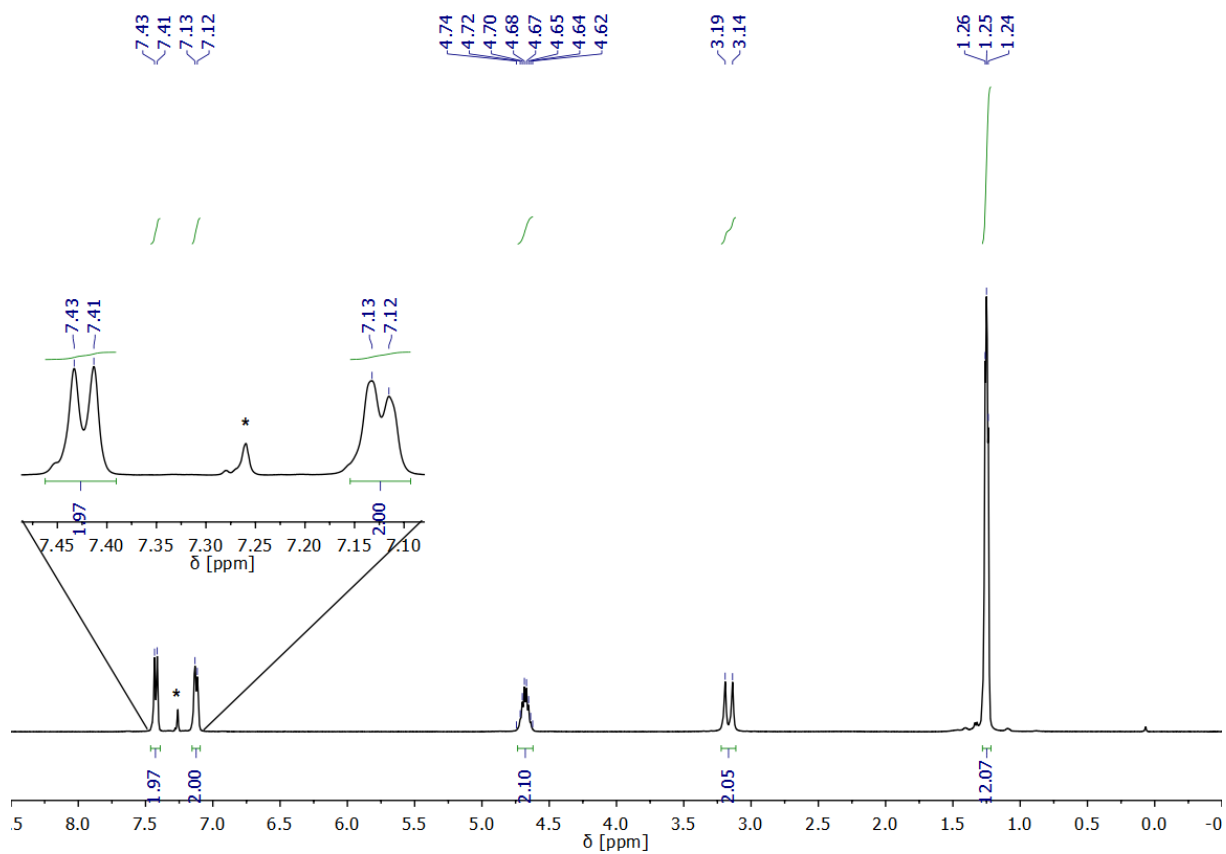

Figure 27:  $^1\text{H-NMR}$  spectrum of **9** in  $\text{CDCl}_3$  (\*).

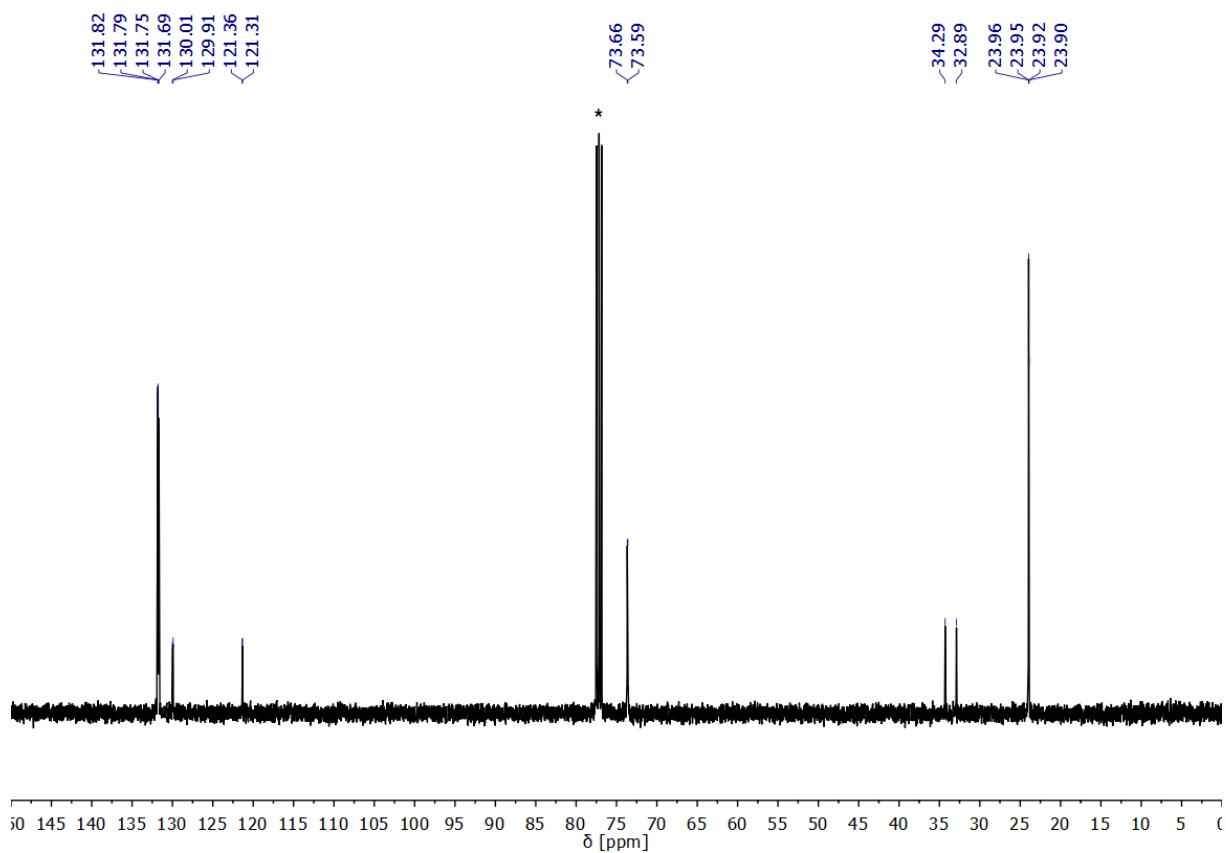

Figure 28:  $^{13}\text{C-NMR}$  spectrum of **9** in  $\text{CDCl}_3$  (\*).

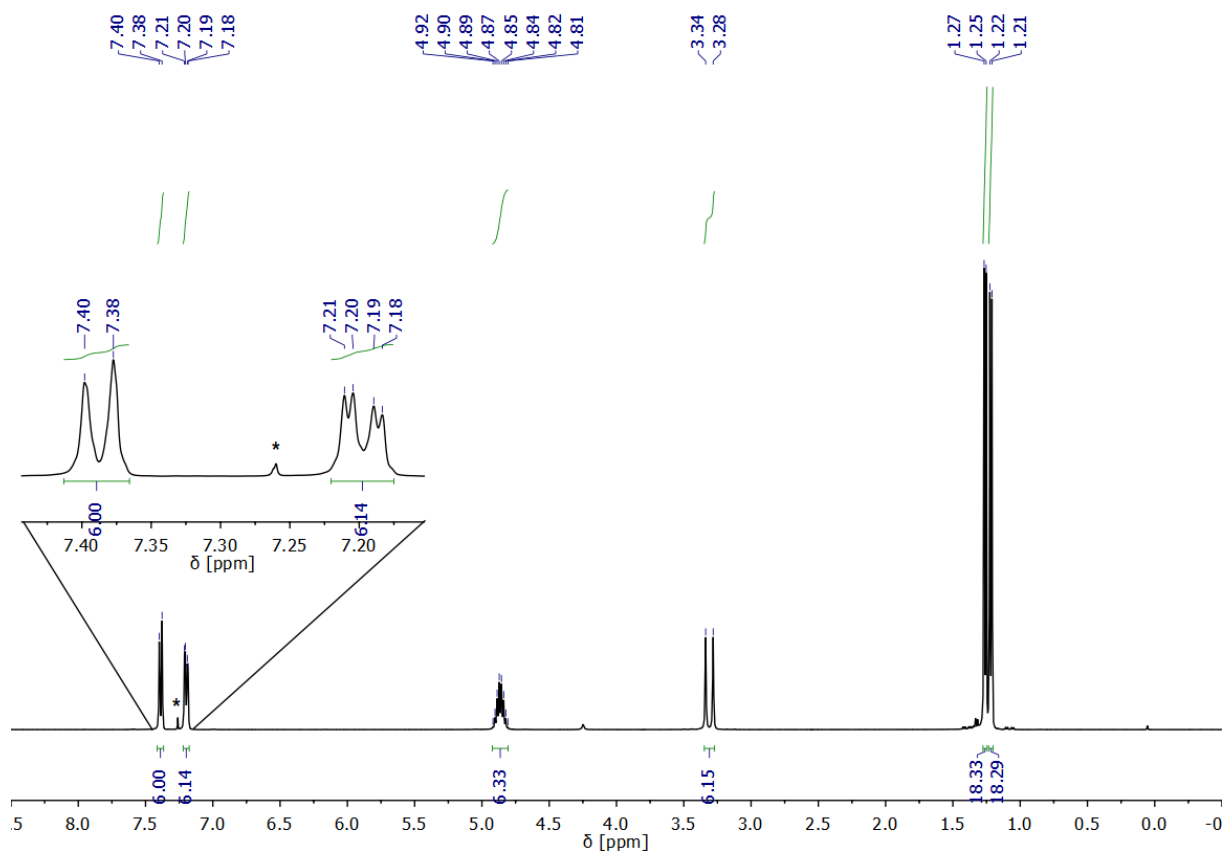

Figure 29:  $^1\text{H-NMR}$  spectrum of **13** in  $\text{CDCl}_3$  (\*).

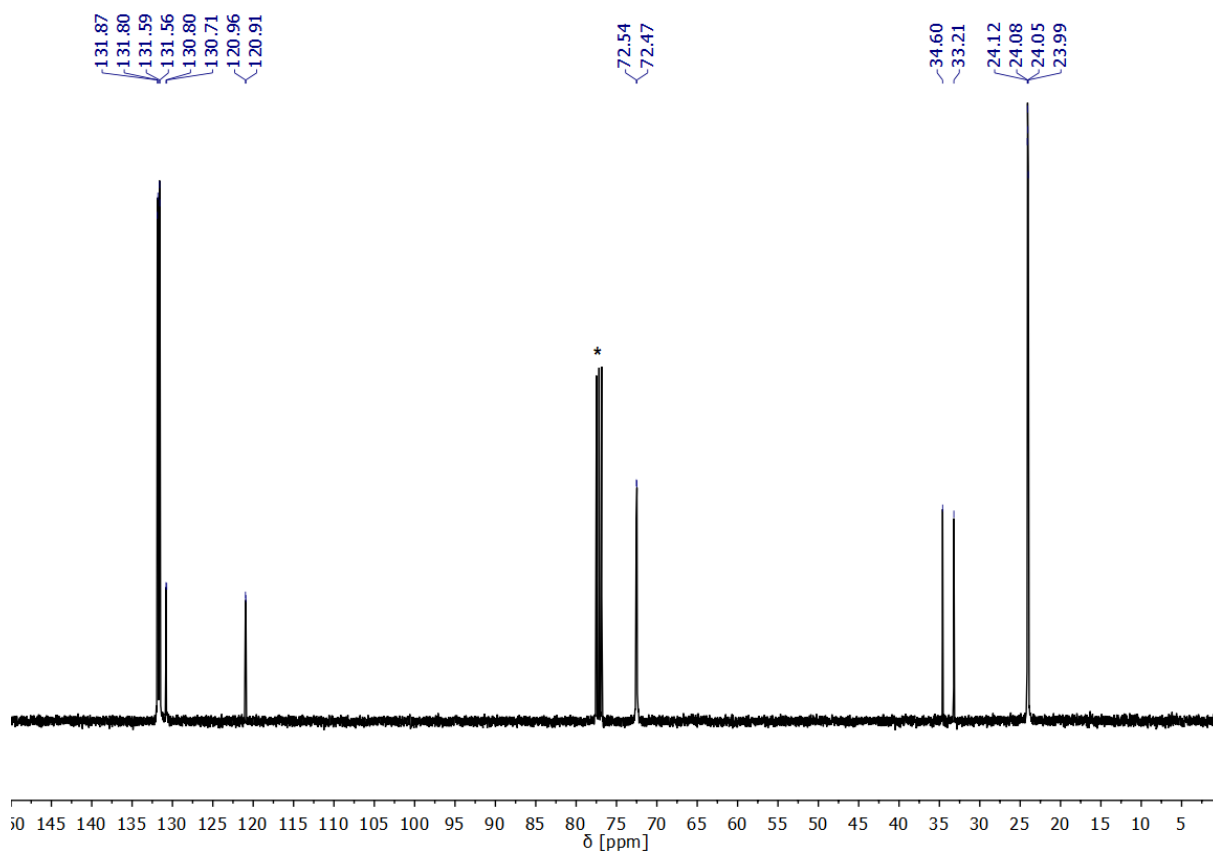

Figure 30:  $^{13}\text{C-NMR}$  spectrum of **13** in  $\text{CDCl}_3$  (\*).

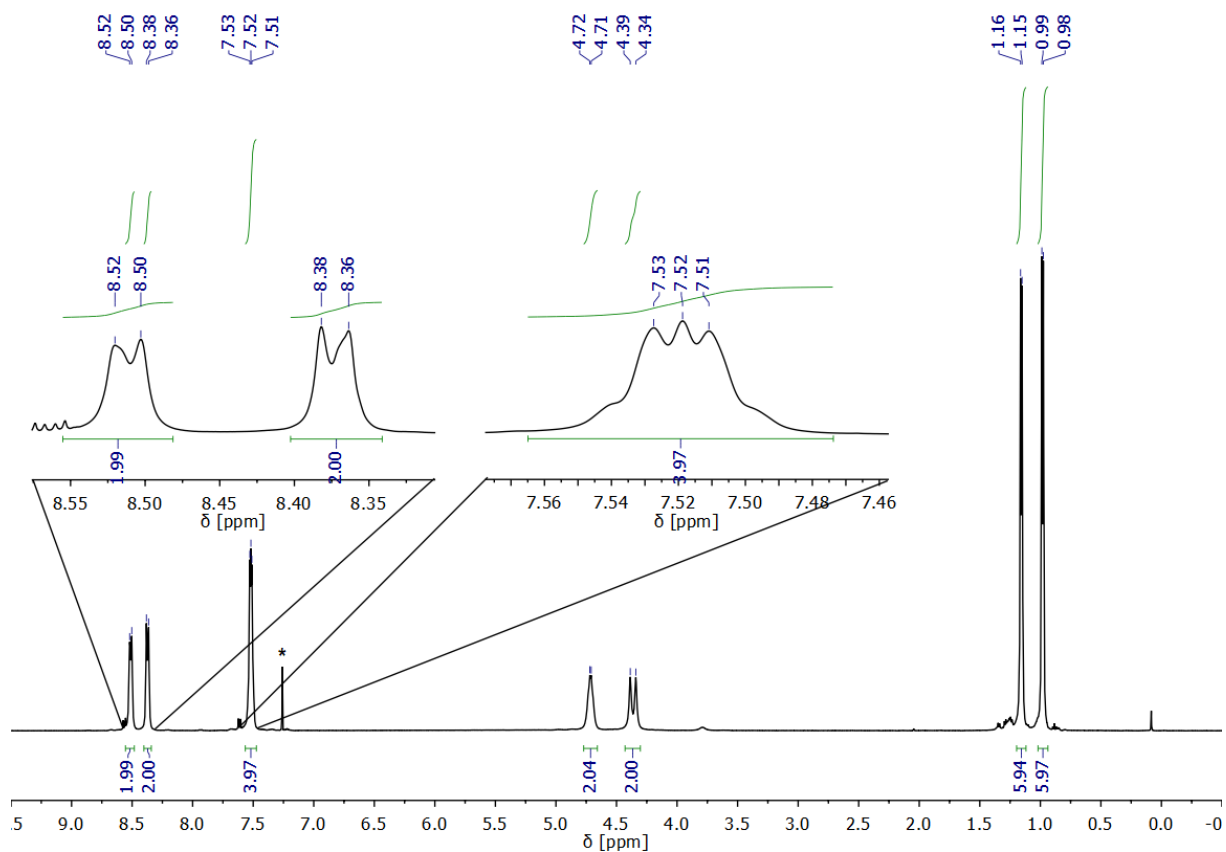

Figure 31:  $^1\text{H-NMR}$  spectrum of **17** in  $\text{CDCl}_3$  (\*).

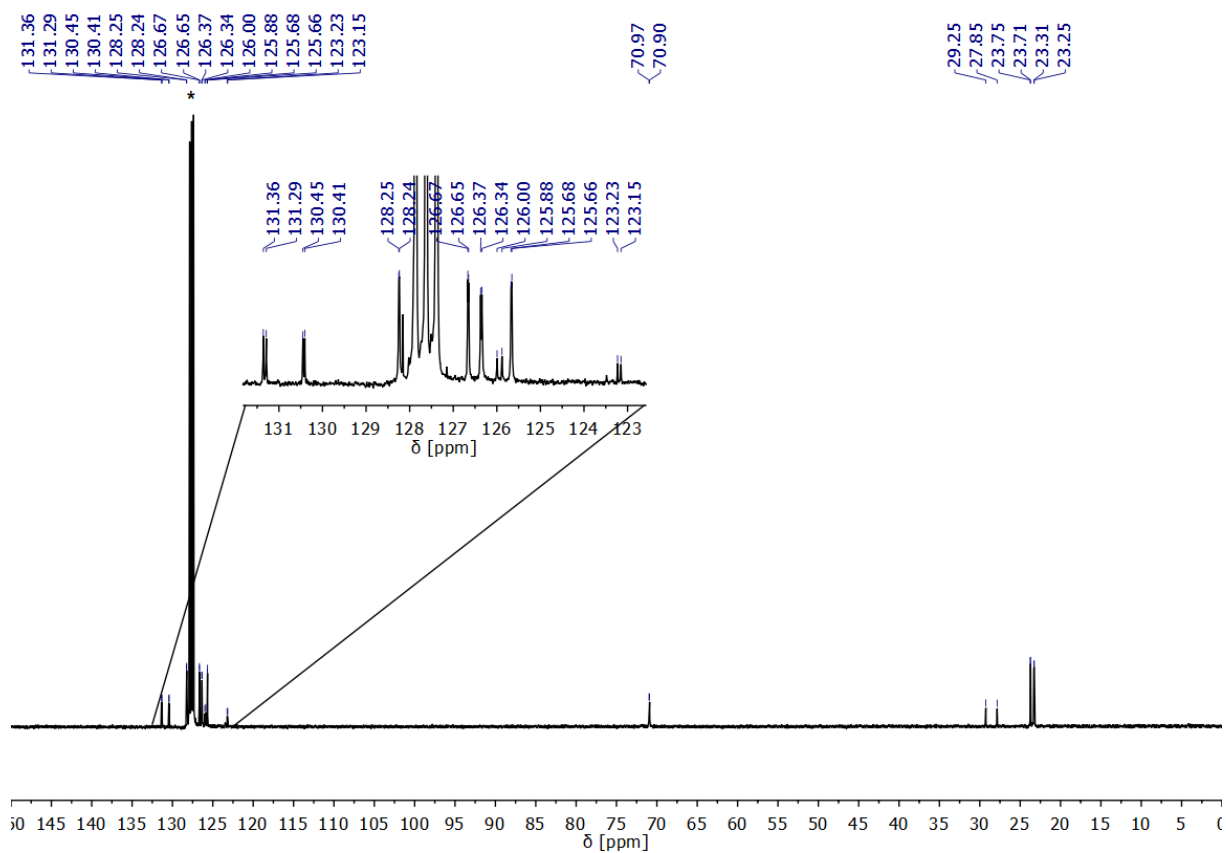

Figure 32:  $^{13}\text{C-NMR}$  spectrum of **17** in  $\text{C}_6\text{D}_6$  (\*).

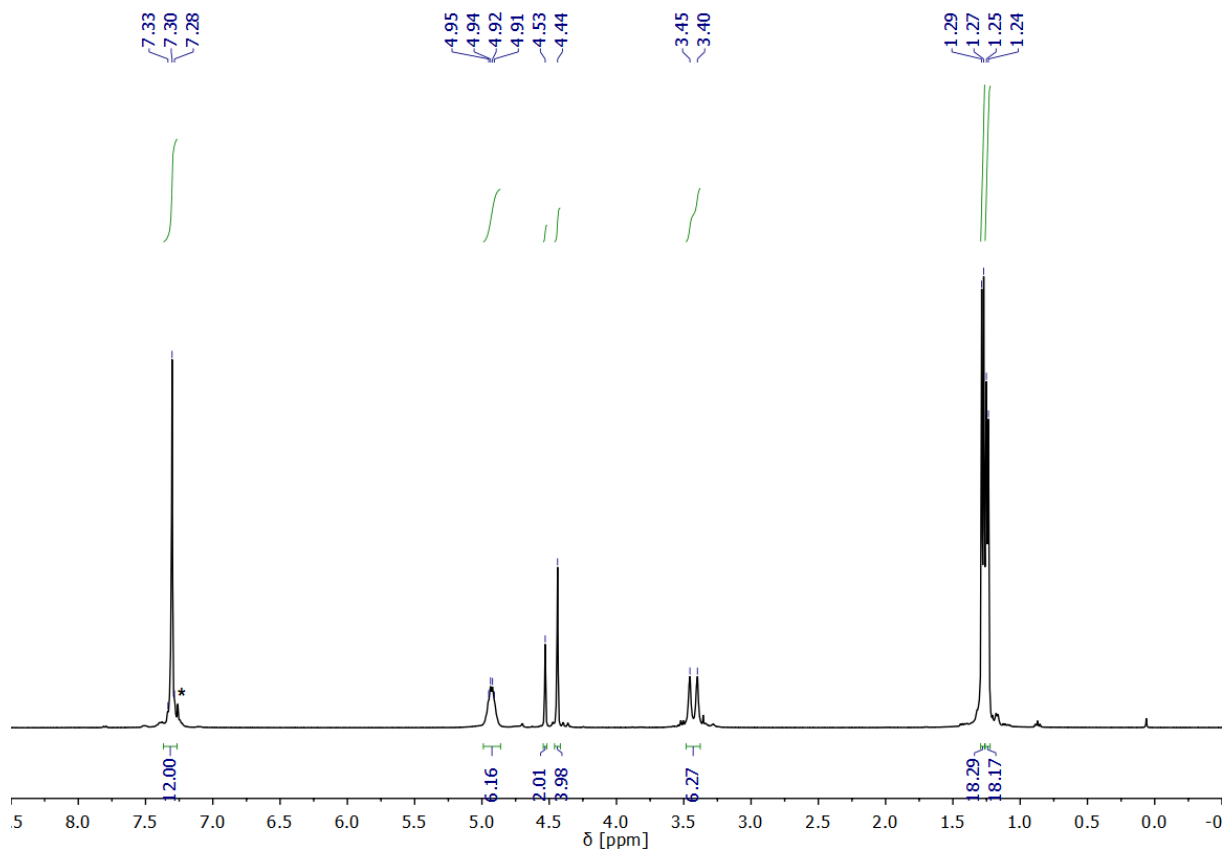

Figure 33:  $^1\text{H}$ -NMR spectrum of **21** in  $\text{CDCl}_3$  (\*).

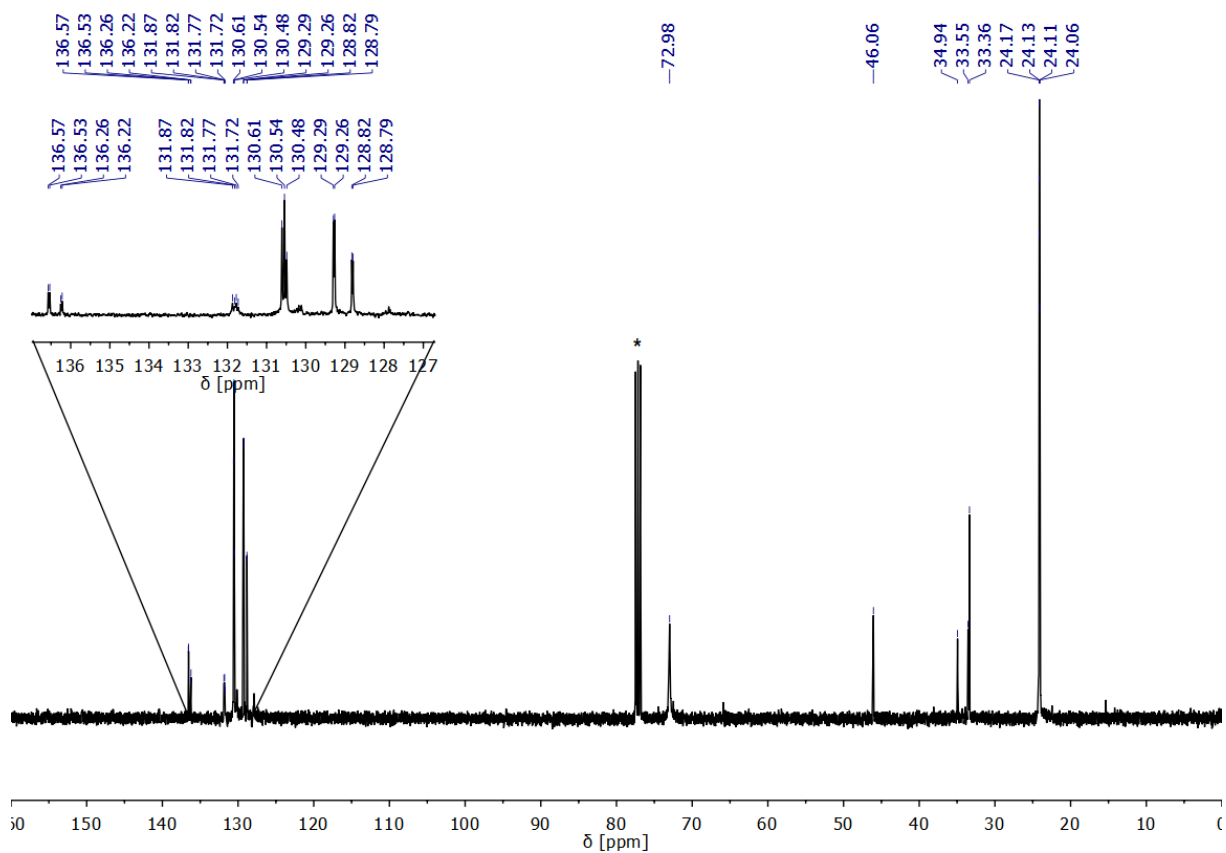

Figure 34:  $^{13}\text{C}$ -NMR spectrum of **21** in  $\text{CDCl}_3$  (\*).

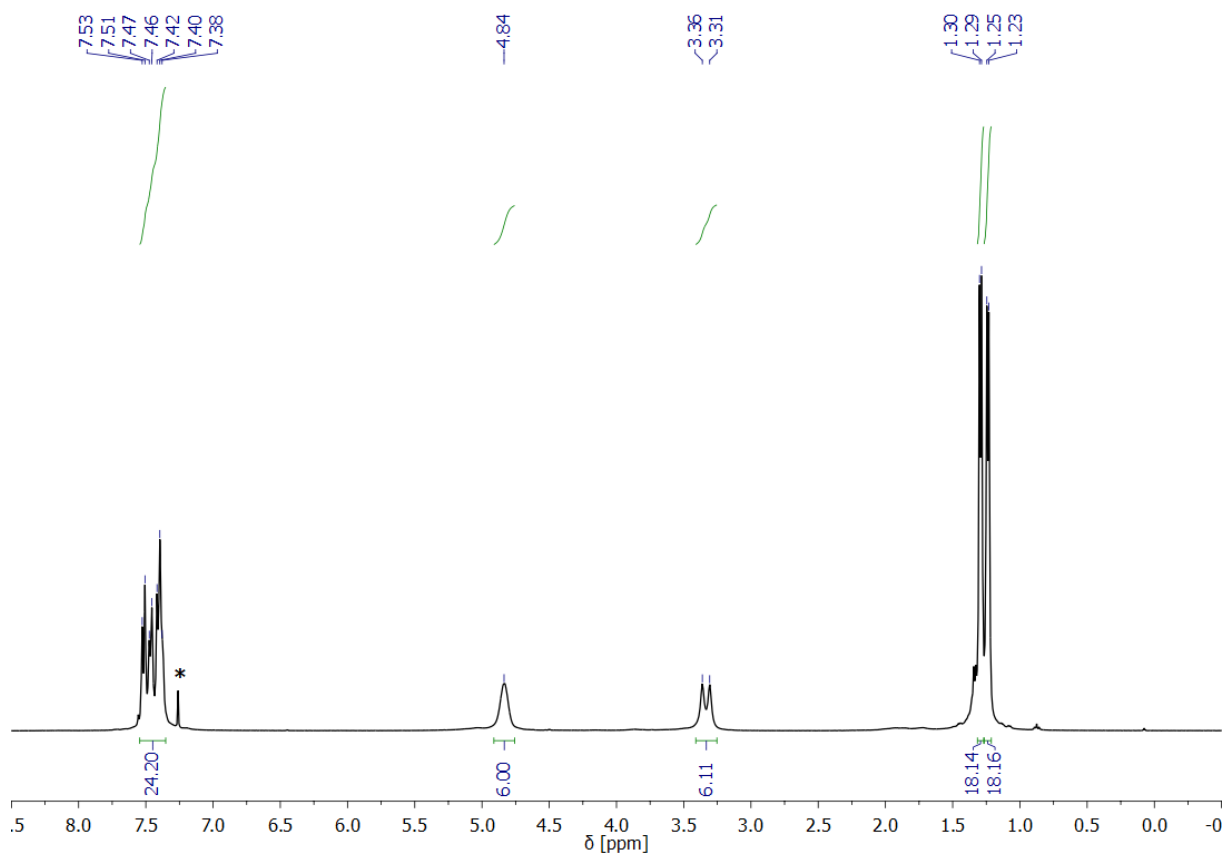

Figure 35:  $^1\text{H-NMR}$  spectrum of **25** in  $\text{CDCl}_3$  (\*).

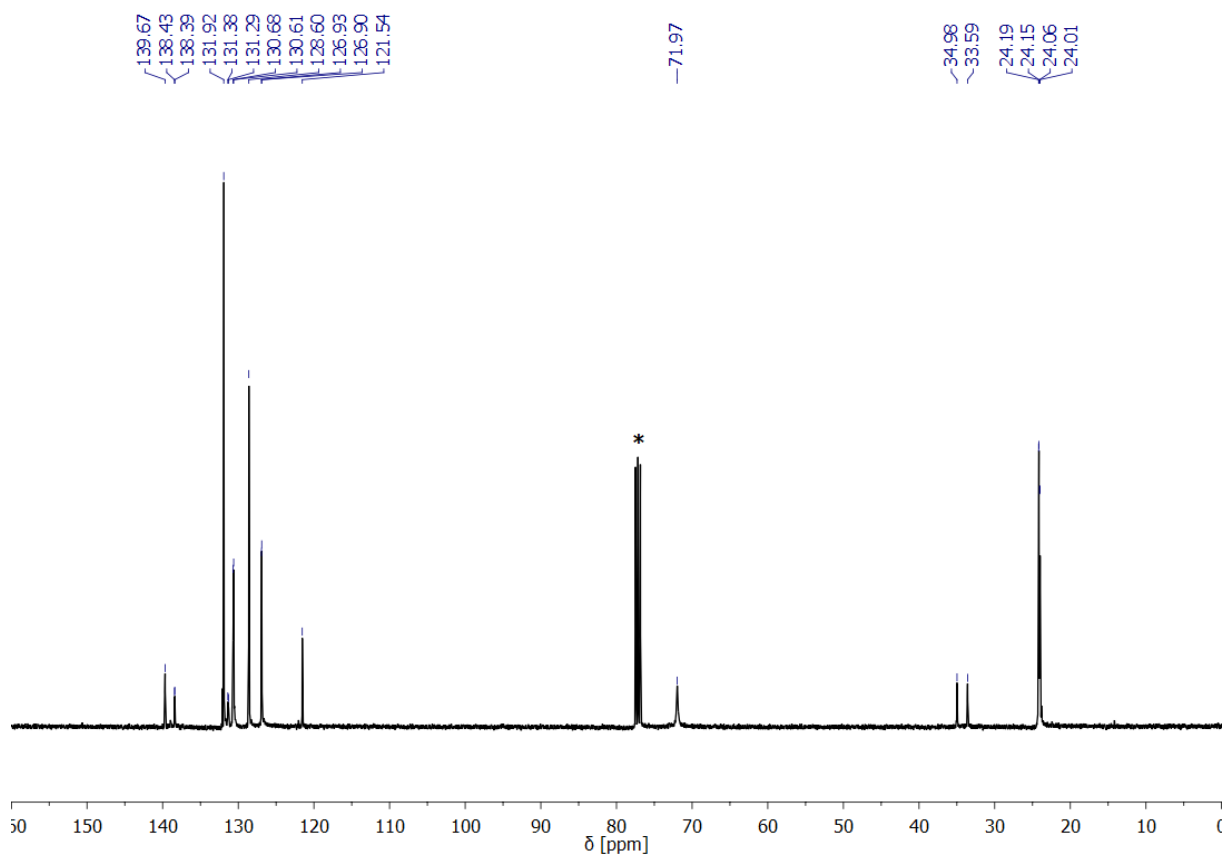

Figure 36:  $^{13}\text{C-NMR}$  spectrum of **25** in  $\text{CDCl}_3$  (\*).

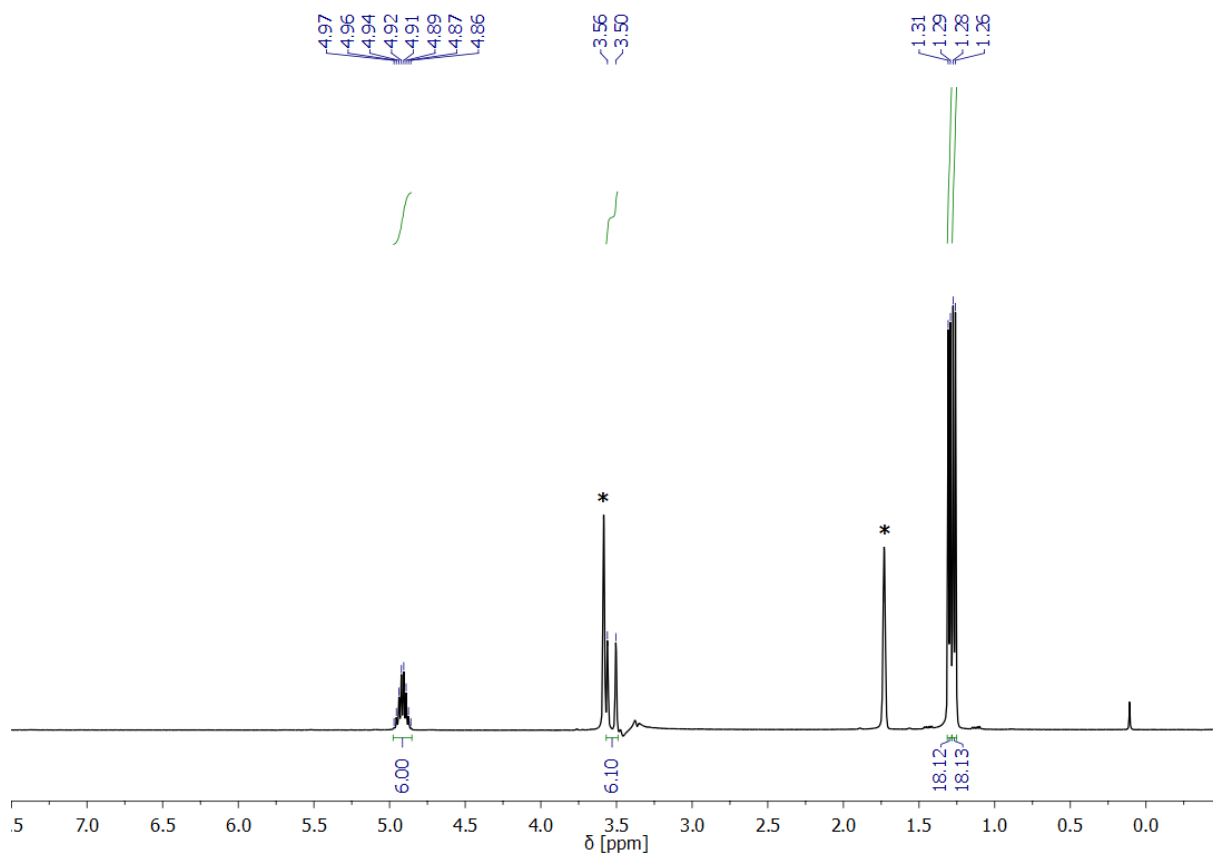

Figure 37:  $^1\text{H}$ -NMR spectrum of **29** in  $\text{THF-d}_8$  (\*).

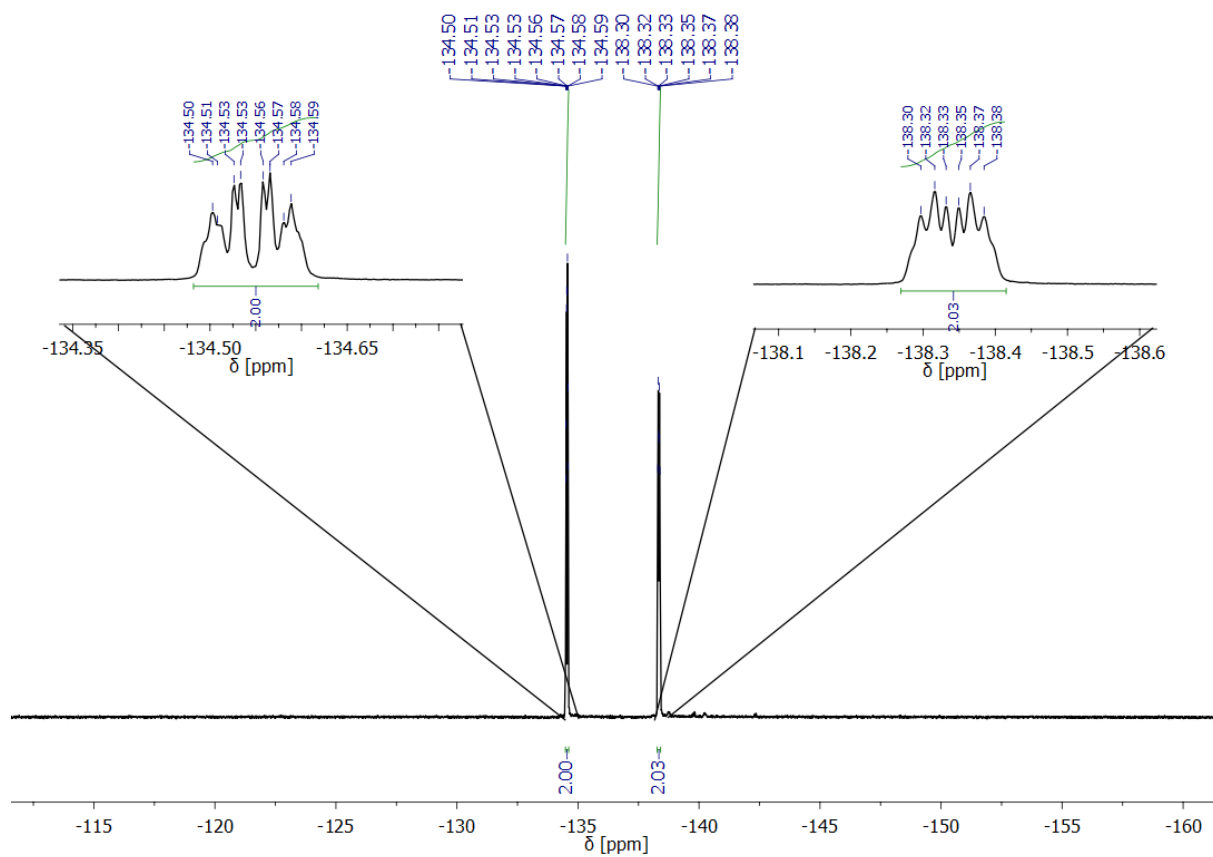

Figure 38:  $^{19}\text{F}$ -NMR spectrum of **29** in  $\text{THF-d}_8$ .



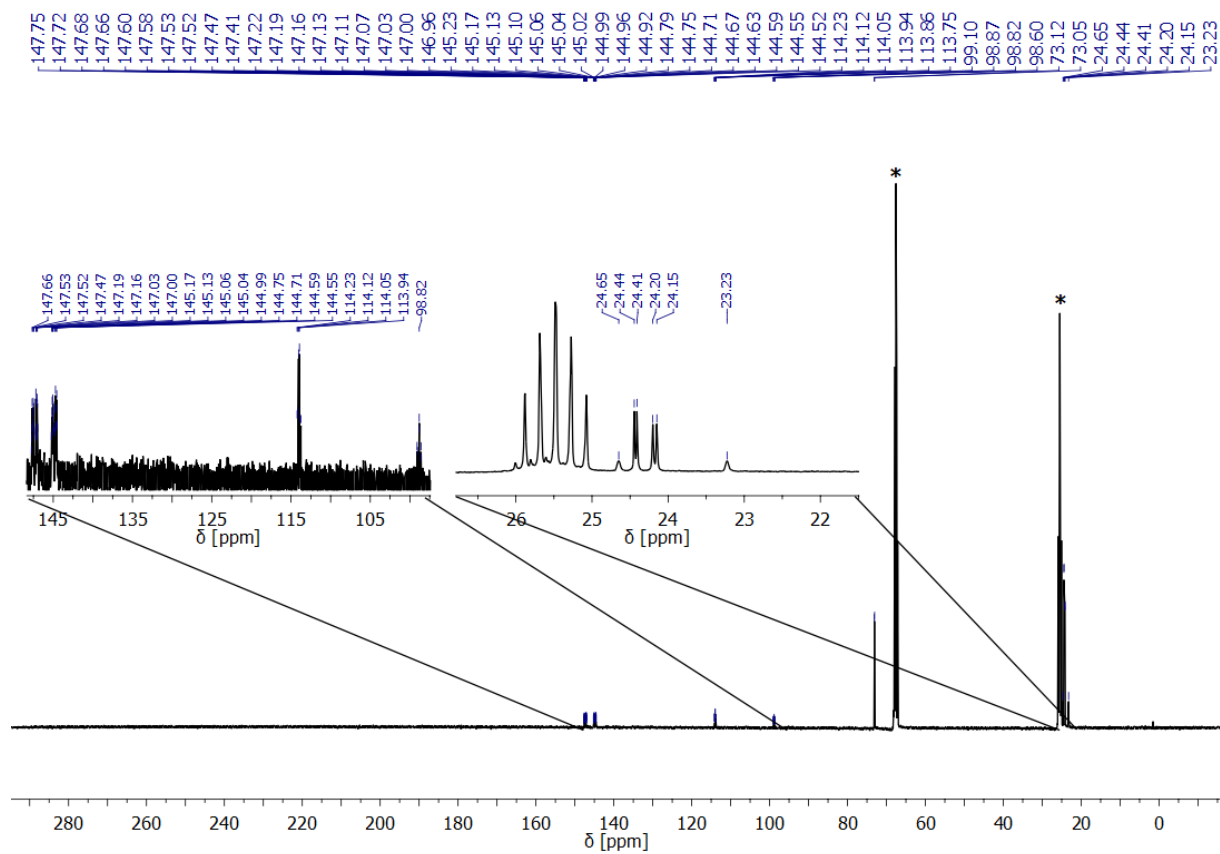

Figure 39:  $^{13}\text{C}$ -NMR spectrum of **29** in  $\text{THF-d}_8$  (\*).

## 2 CRYSTALLOGRAPHIC DATA

Table 1: Crystallographic data for ligands **L3**, **L6** and complexes **2**, **3**, **5**, **10** and **13**.

| Compound                                                     | L3                                                 | L6                                                                | 2                                                                               | 3                                                                               | 5                                                                                               | 10                                                                                              | 13                                                                                                              |
|--------------------------------------------------------------|----------------------------------------------------|-------------------------------------------------------------------|---------------------------------------------------------------------------------|---------------------------------------------------------------------------------|-------------------------------------------------------------------------------------------------|-------------------------------------------------------------------------------------------------|-----------------------------------------------------------------------------------------------------------------|
| CCDC number                                                  | 2021050                                            | 2021051                                                           | 2021052                                                                         | 2021053                                                                         | 2021054                                                                                         | 2021055                                                                                         | 2021056                                                                                                         |
| formula                                                      | C <sub>21</sub> H <sub>24</sub> BrO <sub>3</sub> P | C <sub>13</sub> H <sub>16</sub> BrF <sub>4</sub> O <sub>3</sub> P | C <sub>39</sub> H <sub>63</sub> N <sub>3</sub> NdO <sub>18</sub> P <sub>3</sub> | C <sub>39</sub> H <sub>63</sub> DyN <sub>3</sub> O <sub>18</sub> P <sub>3</sub> | C <sub>78</sub> H <sub>126</sub> Cl <sub>6</sub> La <sub>2</sub> O <sub>18</sub> P <sub>6</sub> | C <sub>39</sub> H <sub>60</sub> Br <sub>3</sub> N <sub>3</sub> NdO <sub>18</sub> P <sub>3</sub> | C <sub>78</sub> H <sub>120</sub> Br <sub>6</sub> Cl <sub>6</sub> La <sub>2</sub> O <sub>18</sub> P <sub>6</sub> |
| MW [g mol <sup>-1</sup> ]                                    | 435.28                                             | 407.14                                                            | 1099.07                                                                         | 1117.33                                                                         | 2028.12                                                                                         | 1335.78                                                                                         | 2501.53                                                                                                         |
| T [K]                                                        | 100(2)                                             | 100(2)                                                            | 100(2)                                                                          | 100(2)                                                                          | 100(2)                                                                                          | 100(2)                                                                                          | 100(2)                                                                                                          |
| space group                                                  | <i>P</i> 2 <sub>1</sub> / <i>c</i>                 | <i>P</i> $\bar{1}$                                                | <i>P</i> 2 <sub>1</sub>                                                         | <i>P</i> 2 <sub>1</sub> / <i>n</i>                                              | <i>P</i> $\bar{1}$                                                                              | <i>P</i> $\bar{1}$                                                                              | <i>P</i> 2 <sub>1</sub> / <i>c</i>                                                                              |
| <i>a</i> [Å]                                                 | 12.3927(5)                                         | 7.6543(6)                                                         | 15.3724(7)                                                                      | 15.0470(5)                                                                      | 13.9287(4)                                                                                      | 16.4380(3)                                                                                      | 14.0316(6)                                                                                                      |
| <i>b</i> [Å]                                                 | 10.6107(4)                                         | 11.3119(8)                                                        | 20.4341(6)                                                                      | 21.2523(7)                                                                      | 13.9984(4)                                                                                      | 20.2226(3)                                                                                      | 28.3123(14)                                                                                                     |
| <i>c</i> [Å]                                                 | 15.1024(5)                                         | 11.4882(9)                                                        | 16.3173(6)                                                                      | 16.3650(6)                                                                      | 14.8205(4)                                                                                      | 20.3926(3)                                                                                      | 14.2123(6)                                                                                                      |
| $\alpha$ [°]                                                 | 90                                                 | 115.082(6)                                                        | 90                                                                              | 90                                                                              | 91.100(2)                                                                                       | 61.9330(10)                                                                                     | 90                                                                                                              |
| $\beta$ [°]                                                  | 101.267(3)                                         | 97.147(6)                                                         | 97.312(3)                                                                       | 97.899(3)                                                                       | 104.058(2)                                                                                      | 70.4940(10)                                                                                     | 116.555(3)                                                                                                      |
| $\gamma$ [°]                                                 | 90                                                 | 106.395(6)                                                        | 90                                                                              | 90                                                                              | 119.094(2)                                                                                      | 67.9000(10)                                                                                     | 90                                                                                                              |
| <i>V</i> [Å <sup>3</sup> ]                                   | 1947.62(13)                                        | 829.47(12)                                                        | 5083.9(3)                                                                       | 5183.6(3)                                                                       | 2417.10(13)                                                                                     | 5439.20(16)                                                                                     | 5050.4(4)                                                                                                       |
| <i>Z</i>                                                     | 4                                                  | 2                                                                 | 4                                                                               | 4                                                                               | 1                                                                                               | 4                                                                                               | 2                                                                                                               |
| $\mu$ [mm <sup>-1</sup> ]                                    | 3.799                                              | 4.765                                                             | 1.185                                                                           | 1.602                                                                           | 9.676                                                                                           | 11.279                                                                                          | 3.520                                                                                                           |
| $\theta_{\max}$ [°]                                          | 70.845                                             | 69.479                                                            | 25.720                                                                          | 25.719                                                                          | 71.350                                                                                          | 69.474                                                                                          | 26.823                                                                                                          |
| reflections measured                                         | 8933                                               | 6462                                                              | 35429                                                                           | 29769                                                                           | 19757                                                                                           | 61374                                                                                           | 24997                                                                                                           |
| reflections unique                                           | 3618                                               | 3010                                                              | 19054                                                                           | 9767                                                                            | 9025                                                                                            | 19710                                                                                           | 10707                                                                                                           |
| <i>R</i> <sub>int</sub>                                      | 0.0127                                             | 0.0322                                                            | 0.0381                                                                          | 0.0174                                                                          | 0.0233                                                                                          | 0.0213                                                                                          | 0.0388                                                                                                          |
| data/restr./ para.                                           | 3618/39/263                                        | 3010/0/203                                                        | 19054/329/1340                                                                  | 9767/42/676                                                                     | 9025/0/508                                                                                      | 19710/106/1309                                                                                  | 10707/105/574                                                                                                   |
| <i>R</i> <sub>1</sub> [ $\sum > 2\sigma(I)$ ] <sup>[a]</sup> | 0.0368                                             | 0.0392                                                            | 0.0432                                                                          | 0.0286                                                                          | 0.0272                                                                                          | 0.0341                                                                                          | 0.0531                                                                                                          |
| <i>wR</i> <sub>2</sub> (all) <sup>[b]</sup>                  | 0.0827                                             | 0.1087                                                            | 0.1162                                                                          | 0.0751                                                                          | 0.0755                                                                                          | 0.0902                                                                                          | 0.1346                                                                                                          |
| $\Delta\rho_{\text{fin}}$ [eÅ <sup>-3</sup> ]                | 0.88/−2.00                                         | 0.73/−0.80                                                        | 1.59/−0.92                                                                      | 0.72/−0.62                                                                      | 0.53/−0.81                                                                                      | 1.39/−1.37                                                                                      | 1.46/−1.34                                                                                                      |

[a]  $R_1 = (\sum |F_o| - |F_c|) / (\sum |F_o|)$ ; [b]  $wR_2 = \{[\sum w(F_o^2 - F_c^2)^2] / [\sum w(F_o^2)^2]\}^{1/2}$ .

Table 2: Crystallographic data for complexes **14**, **17-20** and **31**, **32**.

| Compound                                                                                                                   | <b>14</b>                                                                                                       | <b>17</b>                                                                                                                                                                   | <b>18</b>                                                                                        | <b>19</b>                                                                                                  | <b>20</b>                                                                                                | <b>31</b>                                                                                                                             | <b>32</b>                                                                                                                             |
|----------------------------------------------------------------------------------------------------------------------------|-----------------------------------------------------------------------------------------------------------------|-----------------------------------------------------------------------------------------------------------------------------------------------------------------------------|--------------------------------------------------------------------------------------------------|------------------------------------------------------------------------------------------------------------|----------------------------------------------------------------------------------------------------------|---------------------------------------------------------------------------------------------------------------------------------------|---------------------------------------------------------------------------------------------------------------------------------------|
| CCDC number                                                                                                                | 2021057                                                                                                         | 2021058                                                                                                                                                                     | 2021059                                                                                          | 2021060                                                                                                    | 2021061                                                                                                  | 2021062                                                                                                                               | 2021063                                                                                                                               |
| formula                                                                                                                    | C <sub>78</sub> H <sub>120</sub> Br <sub>6</sub> Cl <sub>6</sub> Nd <sub>2</sub> O <sub>18</sub> P <sub>6</sub> | C <sub>88</sub> H <sub>108</sub> Br <sub>4</sub> Cl <sub>6</sub> La <sub>2</sub> O <sub>14</sub> P <sub>4</sub><br>· C <sub>14</sub> H <sub>8</sub> Br <sub>2</sub> · 2EtOH | C <sub>63</sub> H <sub>74</sub> Br <sub>3</sub> Cl <sub>3</sub> NdO <sub>10</sub> P <sub>3</sub> | C <sub>44</sub> H <sub>54</sub> Br <sub>2</sub> Cl <sub>3</sub> DyO <sub>7</sub> P <sub>2</sub><br>· 2EtOH | C <sub>63</sub> H <sub>72</sub> Br <sub>3</sub> Cl <sub>3</sub> ErO <sub>9</sub> P <sub>3</sub><br>· THF | C <sub>39</sub> H <sub>50</sub> Br <sub>3</sub> Cl <sub>2</sub> DyF <sub>12</sub> O <sub>10</sub> P <sub>3</sub><br>· Cl <sup>-</sup> | C <sub>39</sub> H <sub>50</sub> Br <sub>3</sub> Cl <sub>2</sub> ErF <sub>12</sub> O <sub>10</sub> P <sub>3</sub><br>· Cl <sup>-</sup> |
| MW [g mol <sup>-1</sup> ]                                                                                                  | 2512.19                                                                                                         | 2751.94                                                                                                                                                                     | 1574.45                                                                                          | 1277.61                                                                                                    | 1651.56                                                                                                  | 1508.28                                                                                                                               | 1513.04                                                                                                                               |
| T [K]                                                                                                                      | 100(2)                                                                                                          | 100(2)                                                                                                                                                                      | 100(2)                                                                                           | 100(2)                                                                                                     | 100(2)                                                                                                   | 100(2)                                                                                                                                | 100(2)                                                                                                                                |
| space group                                                                                                                | <i>P</i> 2 <sub>1</sub> / <i>c</i>                                                                              | <i>P</i> $\bar{1}$                                                                                                                                                          | <i>P</i> $\bar{1}$                                                                               | <i>P</i> $\bar{1}$                                                                                         | <i>P</i> 2 <sub>1</sub> / <i>c</i>                                                                       | <i>P</i> $\bar{1}$                                                                                                                    | <i>P</i> $\bar{1}$                                                                                                                    |
| <i>a</i> [Å]                                                                                                               | 14.0648(5)                                                                                                      | 13.4455(5)                                                                                                                                                                  | 13.6169(7)                                                                                       | 11.2192(4)                                                                                                 | 21.3578(6)                                                                                               | 13.4866(11)                                                                                                                           | 13.3443(19)                                                                                                                           |
| <i>b</i> [Å]                                                                                                               | 29.1214(12)                                                                                                     | 13.7347(6)                                                                                                                                                                  | 15.8635(9)                                                                                       | 13.3757(4)                                                                                                 | 16.3493(6)                                                                                               | 14.6216(17)                                                                                                                           | 14.464(2)                                                                                                                             |
| <i>c</i> [Å]                                                                                                               | 14.2850(5)                                                                                                      | 15.6918(7)                                                                                                                                                                  | 17.6449(8)                                                                                       | 20.6992(7)                                                                                                 | 22.3921(6)                                                                                               | 16.3342(12)                                                                                                                           | 16.184(2)                                                                                                                             |
| $\alpha$ [°]                                                                                                               | 90                                                                                                              | 97.274(3)                                                                                                                                                                   | 103.591(4)                                                                                       | 101.357(3)                                                                                                 | 90                                                                                                       | 110.663(7)                                                                                                                            | 111.069(10)                                                                                                                           |
| $\beta$ [°]                                                                                                                | 116.184(2)                                                                                                      | 98.726(3)                                                                                                                                                                   | 100.785(4)                                                                                       | 98.671(3)                                                                                                  | 115.243(2)                                                                                               | 110.117(6)                                                                                                                            | 110.094(11)                                                                                                                           |
| $\gamma$ [°]                                                                                                               | 90                                                                                                              | 93.626(3)                                                                                                                                                                   | 111.726(4)                                                                                       | 111.903(2)                                                                                                 | 90                                                                                                       | 91.210(8)                                                                                                                             | 91.110(12)                                                                                                                            |
| <i>V</i> [Å <sup>3</sup> ]                                                                                                 | 5250.5(3)                                                                                                       | 2831.1(2)                                                                                                                                                                   | 3279.2(3)                                                                                        | 2738.39(17)                                                                                                | 7072.3(4)                                                                                                | 2792.5(5)                                                                                                                             | 2700.8(7)                                                                                                                             |
| Z                                                                                                                          | 2                                                                                                               | 1                                                                                                                                                                           | 2                                                                                                | 2                                                                                                          | 4                                                                                                        | 2                                                                                                                                     | 2                                                                                                                                     |
| $\mu$ [mm <sup>-1</sup> ]                                                                                                  | 12.863                                                                                                          | 3.120                                                                                                                                                                       | 2.870                                                                                            | 11.311                                                                                                     | 6.311                                                                                                    | 3.802                                                                                                                                 | 4.102                                                                                                                                 |
| $\theta_{\max}$ [°]                                                                                                        | 69.496                                                                                                          | 26.834                                                                                                                                                                      | 26.851                                                                                           | 71.152                                                                                                     | 69.984                                                                                                   | 25.798                                                                                                                                | 25.829                                                                                                                                |
| reflections measured                                                                                                       | 24449                                                                                                           | 22575                                                                                                                                                                       | 26012                                                                                            | 20943                                                                                                      | 26810                                                                                                    | 19255                                                                                                                                 | 18654                                                                                                                                 |
| reflections unique                                                                                                         | 9520                                                                                                            | 11968                                                                                                                                                                       | 13831                                                                                            | 10129                                                                                                      | 12928                                                                                                    | 10468                                                                                                                                 | 10143                                                                                                                                 |
| <i>R</i> <sub>int</sub>                                                                                                    | 0.0879                                                                                                          | 0.0386                                                                                                                                                                      | 0.0629                                                                                           | 0.0275                                                                                                     | 0.0515                                                                                                   | 0.0544                                                                                                                                | 0.0668                                                                                                                                |
| data/restr./ para.                                                                                                         | 9520/0/535                                                                                                      | 11968/95/738                                                                                                                                                                | 13831/0/768                                                                                      | 10129/49/627                                                                                               | 12928/0/796                                                                                              | 10468/0/660                                                                                                                           | 10143/18/653                                                                                                                          |
| <i>R</i> <sub>1</sub> [ $ I > 2\sigma(I) $ ] <sup>[a]</sup>                                                                | 0.0995                                                                                                          | 0.0437                                                                                                                                                                      | 0.0477                                                                                           | 0.0470                                                                                                     | 0.0661                                                                                                   | 0.0597                                                                                                                                | 0.0594                                                                                                                                |
| w <i>R</i> <sub>2</sub> (all) <sup>[b]</sup>                                                                               | 0.3002                                                                                                          | 0.1035                                                                                                                                                                      | 0.1140                                                                                           | 0.1317                                                                                                     | 0.1915                                                                                                   | 0.1435                                                                                                                                | 0.1681                                                                                                                                |
| $\Delta\rho_{\text{fin}}$ [eÅ <sup>-3</sup> ]                                                                              | 2.64/-1.26                                                                                                      | 1.05/-1.50                                                                                                                                                                  | 1.36/-1.02                                                                                       | 1.78/-1.64                                                                                                 | 3.05/-1.45                                                                                               | 1.38/-1.64                                                                                                                            | 2.32/-1.25                                                                                                                            |
| [a] $R_1 = (\sum  F_o  -  F_c ) / (\sum  F_o )$ ; [b] $wR_2 = \{[\sum w(F_o^2 - F_c^2)^2] / \{\sum w(F_o^2)^2\}\}^{1/2}$ . |                                                                                                                 |                                                                                                                                                                             |                                                                                                  |                                                                                                            |                                                                                                          |                                                                                                                                       |                                                                                                                                       |

## 2.1 L3

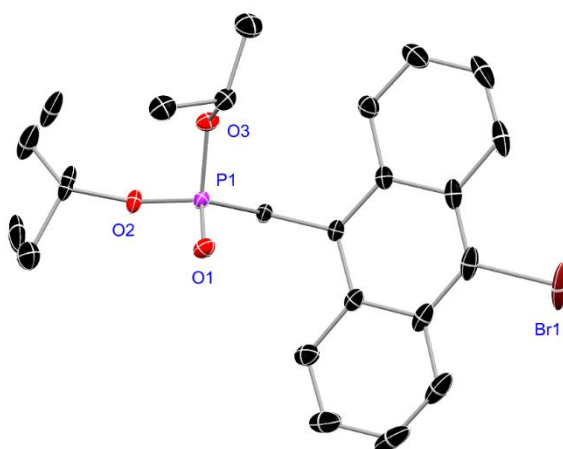

Figure 40: Asymmetric unit of **L3**.

**L3** crystallizes in the space group  $P2_1/c$ . One of the two *iPr* residues is disordered about two positions. They are refined with distance restraints and restraints for the anisotropic displacement parameters. One carbon atom and its corresponding disordered congener are constrained to be the same. The occupancy of the minor position refined to 0.340(17).

Bond lengths [Å] and angles [°] of **L3**.

|                              |            |                                          |            |
|------------------------------|------------|------------------------------------------|------------|
| <i>Br</i> (1)– <i>C</i> (9)  | 1.910(2)   | <i>C</i> (11)– <i>C</i> (12)             | 1.348(4)   |
| <i>O</i> (1)– <i>P</i> (1)   | 1.4679(17) | <i>C</i> (12)– <i>C</i> (13)             | 1.417(4)   |
| <i>P</i> (1)– <i>O</i> (2)   | 1.5782(16) | <i>C</i> (13)– <i>C</i> (14)             | 1.358(4)   |
| <i>P</i> (1)– <i>O</i> (3)   | 1.5829(16) | <i>C</i> (14)– <i>C</i> (15)             | 1.426(3)   |
| <i>P</i> (1)– <i>C</i> (1)   | 1.805(2)   | <i>O</i> (2)– <i>C</i> (16)              | 1.471(7)   |
| <i>C</i> (1)– <i>C</i> (2)   | 1.518(3)   | <i>O</i> (2)– <i>C</i> (16A)             | 1.477(14)  |
| <i>C</i> (2)– <i>C</i> (15)  | 1.405(3)   | <i>C</i> (16)– <i>C</i> (18)             | 1.503(9)   |
| <i>C</i> (2)– <i>C</i> (3)   | 1.409(3)   | <i>C</i> (16)– <i>C</i> (17)             | 1.509(7)   |
| <i>C</i> (3)– <i>C</i> (4)   | 1.424(4)   | <i>C</i> (16A)– <i>C</i> (17A)           | 1.503(16)  |
| <i>C</i> (3)– <i>C</i> (8)   | 1.446(3)   | <i>C</i> (16A)– <i>C</i> (18A)           | 1.505(14)  |
| <i>O</i> (3)– <i>C</i> (19)  | 1.470(3)   | <i>C</i> (20)– <i>C</i> (19)             | 1.513(4)   |
| <i>C</i> (4)– <i>C</i> (5)   | 1.360(4)   | <i>C</i> (21)– <i>C</i> (19)             | 1.513(4)   |
| <i>C</i> (5)– <i>C</i> (6)   | 1.413(4)   |                                          |            |
| <i>C</i> (8)– <i>C</i> (9)   | 1.400(4)   | <i>O</i> (1)– <i>P</i> (1)– <i>O</i> (2) | 116.40(10) |
| <i>C</i> (8)– <i>C</i> (7)   | 1.427(4)   | <i>O</i> (1)– <i>P</i> (1)– <i>O</i> (3) | 113.59(9)  |
| <i>C</i> (7)– <i>C</i> (6)   | 1.352(5)   | <i>O</i> (2)– <i>P</i> (1)– <i>O</i> (3) | 103.63(9)  |
| <i>C</i> (9)– <i>C</i> (10)  | 1.394(4)   | <i>O</i> (1)– <i>P</i> (1)– <i>C</i> (1) | 116.07(10) |
| <i>C</i> (10)– <i>C</i> (11) | 1.432(4)   | <i>O</i> (2)– <i>P</i> (1)– <i>C</i> (1) | 98.97(9)   |
| <i>C</i> (10)– <i>C</i> (15) | 1.449(3)   |                                          |            |



|                |                 |                 |
|----------------|-----------------|-----------------|
| Moiety formula | C21 H24 Br O3 P | ?               |
| Sum formula    | C21 H24 Br O3 P | C21 H24 Br O3 P |
| Mr             | 435.27          | 435.28          |
| Dx,g cm-3      | 1.485           | 1.484           |
| Z              | 4               | 4               |
| Mu (mm-1)      | 3.799           | 3.799           |
| F000           | 896.0           | 896.0           |
| F000'          | 896.51          |                 |
| h,k,lmax       | 15,13,18        | 15,12,18        |
| Nref           | 3746            | 3618            |
| Tmin,Tmax      | 0.477,0.710     | 0.399,0.717     |
| Tmin'          | 0.368           |                 |

Correction method= # Reported T Limits: Tmin=0.399 Tmax=0.717

AbsCorr = MULTI-SCAN

Data completeness= 0.966

Theta(max)= 70.845

R(reflections)= 0.0368( 3420)

wR2(reflections)= 0.0827( 3618)

S = 1.072

Npar= 263

The following ALERTS were generated. Each ALERT has the format **test-name\_ALERT\_alert-type\_alert-level**.

Click on the hyperlinks for more details of the test.

|                                                                                                          |                             |            |
|----------------------------------------------------------------------------------------------------------|-----------------------------|------------|
|  <b>Alert level C</b> |                             |            |
| PLAT213_ALERT_2_C Atom Br1                                                                               | has ADP max/min Ratio ..... | 3.7 prolat |
| PLAT213_ALERT_2_C Atom C17A                                                                              | has ADP max/min Ratio ..... | 3.1 prolat |
| PLAT220_ALERT_2_C NonSolvent Resd 1 C                                                                    | Ueq(max) / Ueq(min) Range   | 3.1 Ratio  |
| PLAT911_ALERT_3_C Missing FCF Refl Between Thmin & STh/L=                                                | 0.600                       | 47 Report  |
| PLAT918_ALERT_3_C Reflection(s) with I(obs) much Smaller I(calc) .                                       |                             | 1 Check    |
| PLAT972_ALERT_2_C Check Calcd Resid. Dens. 1.05A From Br1                                                |                             | -1.86 eA-3 |

|                                                                                                          |  |             |
|----------------------------------------------------------------------------------------------------------|--|-------------|
|  <b>Alert level G</b> |  |             |
| PLAT002_ALERT_2_G Number of Distance or Angle Restraints on AtSite                                       |  | 7 Note      |
| PLAT003_ALERT_2_G Number of Uiso or Uij Restrained non-H Atoms ...                                       |  | 5 Report    |
| PLAT171_ALERT_4_G The CIF-Embedded .res File Contains EADP Records                                       |  | 1 Report    |
| PLAT175_ALERT_4_G The CIF-Embedded .res File Contains SAME Records                                       |  | 1 Report    |
| PLAT178_ALERT_4_G The CIF-Embedded .res File Contains SIMU Records                                       |  | 2 Report    |
| PLAT187_ALERT_4_G The CIF-Embedded .res File Contains RIGU Records                                       |  | 1 Report    |
| PLAT301_ALERT_3_G Main Residue Disorder .....(Resd 1 )                                                   |  | 12% Note    |
| PLAT720_ALERT_4_G Number of Unusual/Non-Standard Labels .....                                            |  | 1 Note      |
| PLAT793_ALERT_4_G Model has Chirality at P1 (Centro SPGR)                                                |  | R Verify    |
| PLAT860_ALERT_3_G Number of Least-Squares Restraints .....                                               |  | 39 Note     |
| PLAT883_ALERT_1_G No Info/Value for _atom_sites_solution_primary .                                       |  | Please Do ! |
| PLAT912_ALERT_4_G Missing # of FCF Reflections Above STh/L= 0.600                                        |  | 82 Note     |
| PLAT941_ALERT_3_G Average HKL Measurement Multiplicity .....                                             |  | 2.5 Low     |
| PLAT978_ALERT_2_G Number C-C Bonds with Positive Residual Density.                                       |  | 12 Info     |

## 2.2 L6

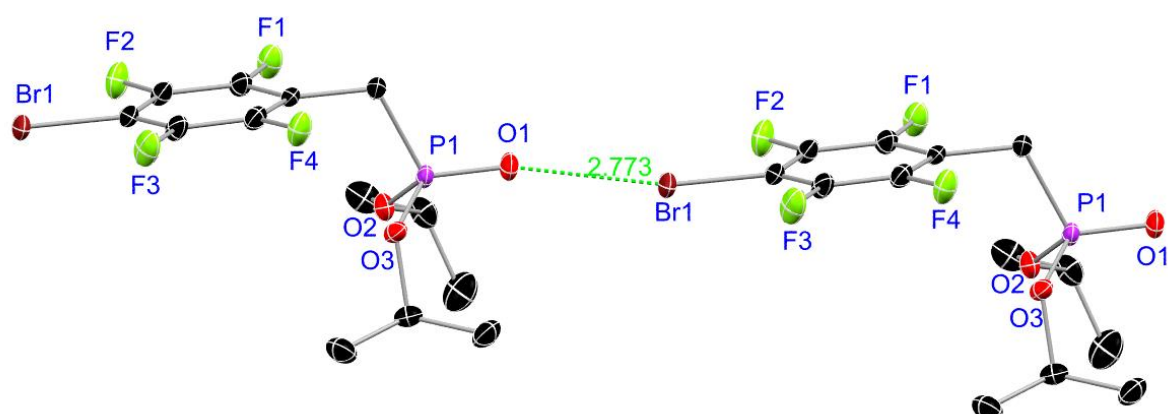

Figure 41: Asymmetric unit of L6.

L6 crystallizes in the space group  $P\bar{1}$ . The asymmetric unit contains one molecule. The -I-effect of the fluoride substituents most likely causes a depletion of electron density at the bromide substituent of each molecule. To compensate for this lack of electron density, the P=O oxygen atom of a neighboring molecule donates electron density to the bromide forming a so-called halogen bond. Thus, the O...Br distance (2.773 Å) is shorter than the sum of the van der Waals radii of both atoms (3.35 Å) causing an A-Alert upon cif-file check.

Bond lengths [Å] and angles [°] of L6.

|                   |                   |                        |                   |
|-------------------|-------------------|------------------------|-------------------|
| <i>Br(1)–C(5)</i> | <i>1.873(3)</i>   | <i>C(8)–C(9)</i>       | <i>1.509(4)</i>   |
| <i>P(1)–O(1)</i>  | <i>1.4653(18)</i> | <i>C(8)–C(10)</i>      | <i>1.509(5)</i>   |
| <i>P(1)–C(1)</i>  | <i>1.803(3)</i>   | <i>C(11)–C(12)</i>     | <i>1.509(4)</i>   |
| <i>P(1)–O(2)</i>  | <i>1.5824(18)</i> | <i>C(11)–C(13)</i>     | <i>1.515(4)</i>   |
| <i>P(1)–O(3)</i>  | <i>1.5681(18)</i> |                        |                   |
| <i>F(1)–C(3)</i>  | <i>1.347(3)</i>   | <i>O(1)–P(1)–C(1)</i>  | <i>112.97(11)</i> |
| <i>C(1)–C(2)</i>  | <i>1.503(3)</i>   | <i>O(1)–P(1)–O(2)</i>  | <i>113.88(11)</i> |
| <i>F(2)–C(4)</i>  | <i>1.339(3)</i>   | <i>O(1)–P(1)–O(3)</i>  | <i>117.66(10)</i> |
| <i>O(2)–C(8)</i>  | <i>1.473(3)</i>   | <i>O(2)–P(1)–C(1)</i>  | <i>106.92(11)</i> |
| <i>C(2)–C(3)</i>  | <i>1.382(4)</i>   | <i>O(3)–P(1)–C(1)</i>  | <i>100.12(11)</i> |
| <i>C(2)–C(7)</i>  | <i>1.392(4)</i>   | <i>O(3)–P(1)–O(2)</i>  | <i>103.83(10)</i> |
| <i>F(3)–C(6)</i>  | <i>1.340(3)</i>   | <i>C(2)–C(1)–P(1)</i>  | <i>113.60(18)</i> |
| <i>O(3)–C(11)</i> | <i>1.471(3)</i>   | <i>C(8)–O(2)–P(1)</i>  | <i>122.44(16)</i> |
| <i>C(3)–C(4)</i>  | <i>1.375(4)</i>   | <i>C(3)–C(2)–C(1)</i>  | <i>122.5(2)</i>   |
| <i>F(4)–C(7)</i>  | <i>1.339(3)</i>   | <i>C(3)–C(2)–C(7)</i>  | <i>116.2(2)</i>   |
| <i>C(4)–C(5)</i>  | <i>1.388(4)</i>   | <i>C(7)–C(2)–C(1)</i>  | <i>121.3(2)</i>   |
| <i>C(5)–C(6)</i>  | <i>1.385(4)</i>   | <i>C(11)–O(3)–P(1)</i> | <i>122.88(15)</i> |
| <i>C(6)–C(7)</i>  | <i>1.377(4)</i>   | <i>F(1)–C(3)–C(2)</i>  | <i>119.4(2)</i>   |

|                                           |          |                                             |          |
|-------------------------------------------|----------|---------------------------------------------|----------|
| <i>F</i> (1)– <i>C</i> (3)– <i>C</i> (4)  | 117.9(2) | <i>F</i> (4)– <i>C</i> (7)– <i>C</i> (2)    | 119.6(2) |
| <i>C</i> (4)– <i>C</i> (3)– <i>C</i> (2)  | 122.7(2) | <i>F</i> (4)– <i>C</i> (7)– <i>C</i> (6)    | 118.5(2) |
| <i>F</i> (2)– <i>C</i> (4)– <i>C</i> (3)  | 119.4(2) | <i>C</i> (6)– <i>C</i> (7)– <i>C</i> (2)    | 121.9(2) |
| <i>F</i> (2)– <i>C</i> (4)– <i>C</i> (5)  | 120.1(2) | <i>O</i> (2)– <i>C</i> (8)– <i>C</i> (10)   | 108.7(2) |
| <i>C</i> (3)– <i>C</i> (4)– <i>C</i> (5)  | 120.5(2) | <i>C</i> (10)– <i>C</i> (8)– <i>C</i> (9)   | 113.6(3) |
| <i>C</i> (4)– <i>C</i> (5)– <i>Br</i> (1) | 121.3(2) | <i>O</i> (3)– <i>C</i> (11)– <i>C</i> (12)  | 104.9(2) |
| <i>C</i> (6)– <i>C</i> (5)– <i>Br</i> (1) | 120.9(2) | <i>O</i> (3)– <i>C</i> (11)– <i>C</i> (13)  | 108.7(2) |
| <i>C</i> (6)– <i>C</i> (5)– <i>C</i> (4)  | 117.7(2) | <i>C</i> (12)– <i>C</i> (11)– <i>C</i> (13) | 113.5(2) |
| <i>F</i> (3)– <i>C</i> (6)– <i>C</i> (5)  | 120.1(2) |                                             |          |
| <i>F</i> (3)– <i>C</i> (6)– <i>C</i> (7)  | 118.9(2) |                                             |          |
| <i>C</i> (7)– <i>C</i> (6)– <i>C</i> (5)  | 121.0(2) |                                             |          |

### **checkCIF/PLATON report**

Structure factors have been supplied for datablock(s) sv0908

THIS REPORT IS FOR GUIDANCE ONLY. IF USED AS PART OF A REVIEW PROCEDURE FOR PUBLICATION, IT SHOULD NOT REPLACE THE EXPERTISE OF AN EXPERIENCED CRYSTALLOGRAPHIC REFEREE.

No syntax errors found. CIF dictionary Interpreting this report

### **Datablock: sv0908**

---

|                 |                    |                    |                  |
|-----------------|--------------------|--------------------|------------------|
| Bond precision: | C-C = 0.0050 Å     | Wavelength=1.54186 |                  |
| Cell:           | a=7.6543(6)        | b=11.3119(8)       | c=11.4882(9)     |
|                 | alpha=115.082(6)   | beta=97.147(6)     | gamma=106.395(6) |
| Temperature:    | 100 K              |                    |                  |
|                 | Calculated         | Reported           |                  |
| Volume          | 829.47(13)         | 829.47(12)         |                  |
| Space group     | P -1               | P -1               |                  |
| Hall group      | -P 1               | -P 1               |                  |
| Moiety formula  | C13 H16 Br F4 O3 P | C13 H16 Br F4 O3 P |                  |
| Sum formula     | C13 H16 Br F4 O3 P | C13 H16 Br F4 O3 P |                  |
| Mr              | 407.13             | 407.14             |                  |
| Dx,g cm-3       | 1.630              | 1.630              |                  |
| Z               | 2                  | 2                  |                  |
| Mu (mm-1)       | 4.765              | 4.765              |                  |
| F000            | 408.0              | 408.0              |                  |
| F000'           | 408.56             |                    |                  |
| h,k,lmax        | 9,13,13            | 9,13,13            |                  |



|           |             |             |
|-----------|-------------|-------------|
| Nref      | 3117        | 3010        |
| Tmin,Tmax | 0.275,0.565 | 0.132,0.536 |
| Tmin'     | 0.164       |             |

Correction method= # Reported T Limits: Tmin=0.132 Tmax=0.536 AbsCorr = MULTI-SCAN

Data completeness= 0.966 Theta(max)= 69.479

R(reflections)= 0.0392( 2882)                      wR2(reflections)= 0.1087( 3010)

S = 1.052                                              Npar= 203

The following ALERTS were generated. Each ALERT has the format

**test-name\_ALERT\_alert-type\_alert-level.**

Click on the hyperlinks for more details of the test.

 **Alert level A**

PLAT431\_ALERT\_2\_A Short Inter HL..A Contact                      Br1    ..O1    .                                              2.78 Ang.  
x,1+y,z = 1\_565 Check

 **Alert level C**

PLAT029\_ALERT\_3\_C\_diffn\_measured\_fraction\_theta\_full value Low .                                              0.977 Why?  
 PLAT911\_ALERT\_3\_C Missing FCF Refl Between Thmin & STh/L=                                              0.600                      70 Report  
 PLAT918\_ALERT\_3\_C Reflection(s) with I(obs) much Smaller I(calc) .                                              2 Check  
 PLAT939\_ALERT\_3\_C Large Value of Not (SHELXL) Weight Optimized S .                      10.27 Check

 **Alert level G**

PLAT154\_ALERT\_1\_G The s.u.'s on the Cell Angles are Equal ..(Note)                                              0.006 Degree  
 PLAT912\_ALERT\_4\_G Missing # of FCF Reflections Above STh/L=                                              0.600                      38 Note  
 PLAT933\_ALERT\_2\_G Number of OMIT Records in Embedded .res File ...                                              17 Note  
 PLAT941\_ALERT\_3\_G Average HKL Measurement Multiplicity .....                                              2.1 Low  
 PLAT978\_ALERT\_2\_G Number C-C Bonds with Positive Residual Density.                                              3 Info

## 2.3 Complex 2

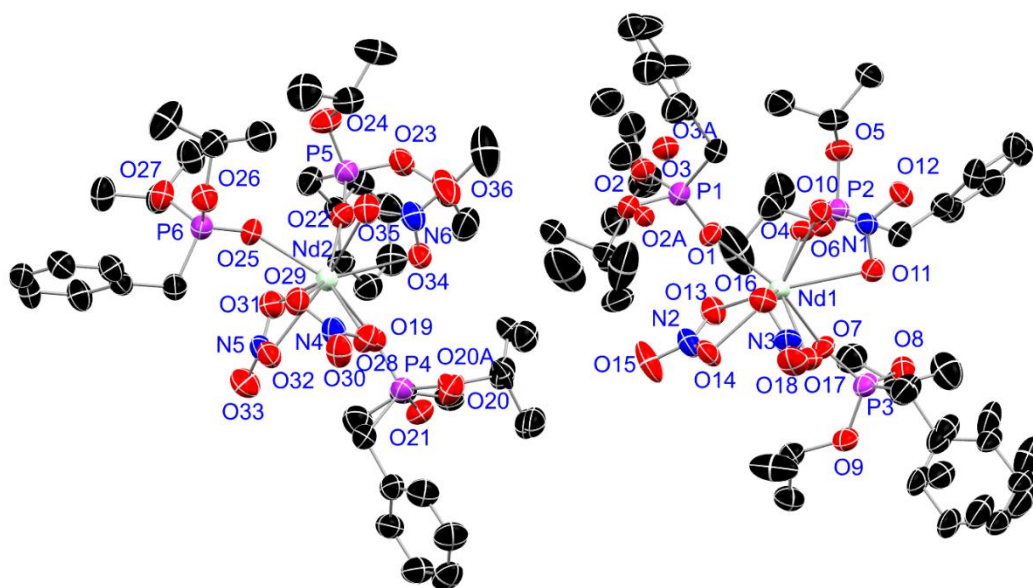

Figure 42: Asymmetric unit of **2**.

**2** crystallizes in the space group  $P2_1$  and the asymmetric unit contains two molecules. Three of the twelve *iPr* residues as well as their bridging O-atoms are disordered about two positions. They are refined with distance restraints and partially with restraints for the anisotropic displacement parameters. One *iPr* carbon atom and its disordered counterpart are constrained to be the same. The occupancy of the minor positions refined to 0.468(27), 0.450(22) and 0.476(24), respectively. Also, one of the phenyl rings is disordered about two positions and they are refined with distance restraints and restraints for the anisotropic displacement parameters. Two of the ring carbon atoms and their disordered congeners are constrained to be the same. The minor position refined to 0.185(31).

Bond lengths [Å] and angles [°] of **2**.

|             |           |            |           |
|-------------|-----------|------------|-----------|
| Nd(1)–O(1)  | 2.349(5)  | N(1)–O(10) | 1.275(9)  |
| Nd(1)–O(4)  | 2.397(6)  | N(1)–O(12) | 1.206(9)  |
| Nd(1)–O(7)  | 2.386(5)  | N(1)–O(11) | 1.278(9)  |
| Nd(1)–O(10) | 2.565(6)  | O(1)–P(1)  | 1.479(6)  |
| Nd(1)–O(11) | 2.540(6)  | P(1)–O(2)  | 1.485(12) |
| Nd(1)–O(13) | 2.521(6)  | P(1)–O(2A) | 1.635(12) |
| Nd(1)–O(14) | 2.501(6)  | P(1)–O(3)  | 1.488(11) |
| Nd(1)–O(16) | 2.531(6)  | P(1)–O(3A) | 1.706(18) |
| Nd(1)–O(17) | 2.526(7)  | O(2)–C(8)  | 1.431(18) |
| C(1)–P(1)   | 1.754(10) | C(8)–C(9)  | 1.47(2)   |
| C(1)–C(2)   | 1.506(13) | C(8)–C(10) | 1.49(2)   |

|               |           |               |           |
|---------------|-----------|---------------|-----------|
| O(2A)–C(8A)   | 1.410(19) | P(4)–O(19)    | 1.478(6)  |
| C(8A)–C(9A)   | 1.45(2)   | P(4)–C(40)    | 1.788(10) |
| C(8A)–C(10A)  | 1.43(2)   | P(4)–O(21)    | 1.550(7)  |
| O(3)–C(11)    | 1.47(2)   | O(20)–C(47)   | 1.457(18) |
| C(11)–C(12)   | 1.50(3)   | C(47)–C(48)   | 1.46(4)   |
| C(11)–C(13)   | 1.48(3)   | C(47)–C(49)   | 1.51(3)   |
| O(3A)–C(11A)  | 1.48(2)   | O(20A)–C(47A) | 1.47(2)   |
| C(11A)–C(12A) | 1.50(3)   | C(47A)–C(48A) | 1.48(4)   |
| C(11A)–C(13A) | 1.49(3)   | C(47A)–C(49A) | 1.52(3)   |
| Nd(2)–O(19)   | 2.400(6)  | N(4)–O(28)    | 1.279(10) |
| Nd(2)–O(22)   | 2.376(6)  | N(4)–O(29)    | 1.260(10) |
| Nd(2)–O(25)   | 2.377(6)  | N(4)–O(30)    | 1.190(10) |
| Nd(2)–O(28)   | 2.514(7)  | C(4)–C(3)     | 1.383(16) |
| Nd(2)–O(29)   | 2.564(7)  | C(7)–C(6)     | 1.384(16) |
| Nd(2)–O(32)   | 2.504(6)  | O(7)–P(3)     | 1.487(6)  |
| Nd(2)–O(31)   | 2.544(7)  | O(6)–C(24)    | 1.488(12) |
| Nd(2)–O(35)   | 2.532(7)  | P(6)–O(25)    | 1.483(6)  |
| Nd(2)–O(34)   | 2.528(6)  | P(6)–O(26)    | 1.561(7)  |
| C(2)–C(7)     | 1.390(17) | P(6)–O(27)    | 1.557(7)  |
| C(2)–C(3)     | 1.350(15) | P(6)–C(66)    | 1.783(10) |
| N(2)–O(13)    | 1.265(11) | N(6)–O(36)    | 1.190(10) |
| N(2)–O(14)    | 1.260(10) | N(6)–O(35)    | 1.282(10) |
| N(2)–O(15)    | 1.206(10) | N(6)–O(34)    | 1.268(10) |
| P(2)–O(5)     | 1.553(6)  | O(8)–C(34)    | 1.479(11) |
| P(2)–O(4)     | 1.491(6)  | O(8)–P(3)     | 1.565(7)  |
| P(2)–O(6)     | 1.559(6)  | O(9)–C(37)    | 1.467(11) |
| P(2)–C(14)    | 1.772(9)  | O(9)–P(3)     | 1.553(7)  |
| N(5)–O(32)    | 1.280(10) | C(14)–C(15)   | 1.511(13) |
| N(5)–O(31)    | 1.273(11) | C(15)–C(20)   | 1.383(14) |
| N(5)–O(33)    | 1.225(10) | C(15)–C(16)   | 1.403(14) |
| C(5)–C(4)     | 1.370(18) | C(20)–C(19)   | 1.392(15) |
| C(5)–C(6)     | 1.375(18) | C(16)–C(17)   | 1.394(14) |
| O(5)–C(21)    | 1.472(11) | O(16)–N(3)    | 1.271(10) |
| P(5)–O(22)    | 1.482(7)  | O(18)–N(3)    | 1.213(10) |
| P(5)–O(23)    | 1.529(7)  | C(18)–C(17)   | 1.367(16) |
| P(5)–O(24)    | 1.573(7)  | C(18)–C(19)   | 1.361(15) |
| P(5)–C(53)    | 1.773(10) | O(17)–N(3)    | 1.273(11) |
| P(4)–O(20)    | 1.546(15) | C(40)–C(41)   | 1.516(13) |
| P(4)–O(20A)   | 1.538(17) | C(42)–C(41)   | 1.389(15) |

|             |           |                  |           |
|-------------|-----------|------------------|-----------|
| C(42)–C(43) | 1.372(16) | C(35)–C(34)      | 1.490(16) |
| C(41)–C(46) | 1.366(14) | C(37)–C(38)      | 1.507(13) |
| C(43)–C(44) | 1.380(17) | C(37)–C(39)      | 1.495(14) |
| C(46)–C(45) | 1.379(15) | P(3)–C(27)       | 1.78(3)   |
| C(45)–C(44) | 1.388(16) | P(3)–C(27A)      | 1.779(12) |
| C(22)–C(21) | 1.497(13) | C(27)–C(28)      | 1.53(3)   |
| C(21)–C(23) | 1.464(14) | C(28)–C(29)      | 1.41(3)   |
| O(21)–C(50) | 1.486(11) | C(28)–C(33)      | 1.37(3)   |
| O(23)–C(60) | 1.470(12) | C(29)–C(30)      | 1.39(3)   |
| C(24)–C(25) | 1.469(16) | C(30)–C(31)      | 1.36(4)   |
| C(24)–C(26) | 1.484(18) | C(31)–C(32)      | 1.36(4)   |
| O(24)–C(63) | 1.460(12) | C(32)–C(33)      | 1.39(4)   |
| O(26)–C(73) | 1.456(13) | C(27A)–C(28A)    | 1.534(15) |
| O(27)–C(76) | 1.453(12) | C(28A)–C(29A)    | 1.40(2)   |
| C(50)–C(51) | 1.504(14) | C(28A)–C(33A)    | 1.37(2)   |
| C(50)–C(52) | 1.480(13) | C(29A)–C(30A)    | 1.40(2)   |
| C(53)–C(54) | 1.485(14) | C(30A)–C(31A)    | 1.36(3)   |
| C(54)–C(55) | 1.395(14) | C(31A)–C(32A)    | 1.36(3)   |
| C(54)–C(59) | 1.372(14) | C(32A)–C(33A)    | 1.38(2)   |
| C(55)–C(56) | 1.384(15) |                  |           |
| C(56)–C(57) | 1.368(16) | N(1)–Nd(1)–N(3)  | 86.5(2)   |
| C(57)–C(58) | 1.370(17) | O(1)–Nd(1)–N(1)  | 100.2(2)  |
| C(58)–C(59) | 1.418(16) | O(1)–Nd(1)–N(2)  | 75.2(2)   |
| C(60)–C(61) | 1.514(19) | O(1)–Nd(1)–O(4)  | 87.2(2)   |
| C(60)–C(62) | 1.489(19) | O(1)–Nd(1)–O(7)  | 151.4(2)  |
| C(63)–C(64) | 1.497(17) | O(1)–Nd(1)–O(10) | 75.4(2)   |
| C(63)–C(65) | 1.490(16) | O(1)–Nd(1)–O(11) | 125.4(2)  |
| C(66)–C(67) | 1.507(13) | O(1)–Nd(1)–O(13) | 75.3(2)   |
| C(67)–C(68) | 1.387(13) | O(1)–Nd(1)–O(14) | 80.4(2)   |
| C(67)–C(72) | 1.370(14) | O(1)–Nd(1)–O(16) | 75.2(2)   |
| C(68)–C(69) | 1.396(14) | O(1)–Nd(1)–O(17) | 123.0(2)  |
| C(69)–C(70) | 1.355(15) | O(1)–Nd(1)–N(3)  | 99.3(2)   |
| C(70)–C(71) | 1.378(15) | N(2)–Nd(1)–N(1)  | 173.5(2)  |
| C(71)–C(72) | 1.386(14) | N(2)–Nd(1)–N(3)  | 98.7(2)   |
| C(73)–C(74) | 1.510(15) | O(4)–Nd(1)–N(1)  | 70.7(2)   |
| C(73)–C(75) | 1.502(14) | O(4)–Nd(1)–N(2)  | 104.2(2)  |
| C(76)–C(77) | 1.506(13) | O(4)–Nd(1)–O(10) | 74.2(2)   |
| C(76)–C(78) | 1.498(16) | O(4)–Nd(1)–O(11) | 77.22(19) |
| C(36)–C(34) | 1.511(15) | O(4)–Nd(1)–O(13) | 78.9(2)   |

|                   |            |                    |           |
|-------------------|------------|--------------------|-----------|
| O(4)–Nd(1)–O(14)  | 129.4(2)   | O(16)–Nd(1)–O(11)  | 89.9(2)   |
| O(4)–Nd(1)–O(16)  | 146.5(2)   | O(16)–Nd(1)–N(3)   | 25.0(2)   |
| O(4)–Nd(1)–O(17)  | 147.3(2)   | O(17)–Nd(1)–N(1)   | 90.0(2)   |
| O(4)–Nd(1)–N(3)   | 157.1(2)   | O(17)–Nd(1)–N(2)   | 96.4(2)   |
| O(7)–Nd(1)–N(1)   | 100.4(2)   | O(17)–Nd(1)–O(10)  | 99.6(2)   |
| O(7)–Nd(1)–N(2)   | 82.5(2)    | O(17)–Nd(1)–O(11)  | 74.7(2)   |
| O(7)–Nd(1)–O(4)   | 81.2(2)    | O(17)–Nd(1)–O(16)  | 50.0(2)   |
| O(7)–Nd(1)–O(10)  | 125.27(19) | O(17)–Nd(1)–N(3)   | 25.0(2)   |
| O(7)–Nd(1)–O(11)  | 77.4(2)    | C(2)–C(1)–P(1)     | 115.8(7)  |
| O(7)–Nd(1)–O(13)  | 76.8(2)    | O(10)–N(1)–Nd(1)   | 59.2(4)   |
| O(7)–Nd(1)–O(14)  | 87.0(2)    | O(10)–N(1)–O(11)   | 115.7(6)  |
| O(7)–Nd(1)–O(16)  | 126.5(2)   | O(12)–N(1)–Nd(1)   | 167.0(6)  |
| O(7)–Nd(1)–O(17)  | 76.6(2)    | O(12)–N(1)–O(10)   | 122.2(7)  |
| O(7)–Nd(1)–N(3)   | 101.6(2)   | O(12)–N(1)–O(11)   | 122.1(7)  |
| O(10)–Nd(1)–N(1)  | 25.27(19)  | O(11)–N(1)–Nd(1)   | 58.1(4)   |
| O(10)–Nd(1)–N(2)  | 150.5(2)   | P(1)–O(1)–Nd(1)    | 161.2(4)  |
| O(10)–Nd(1)–N(3)  | 86.1(2)    | O(1)–P(1)–C(1)     | 113.1(4)  |
| O(11)–Nd(1)–N(1)  | 25.27(19)  | O(1)–P(1)–O(2)     | 118.0(6)  |
| O(11)–Nd(1)–N(2)  | 159.3(2)   | O(1)–P(1)–O(2A)    | 110.2(6)  |
| O(11)–Nd(1)–O(10) | 50.08(19)  | O(1)–P(1)–O(3)     | 112.4(6)  |
| O(11)–Nd(1)–N(3)  | 81.2(2)    | O(1)–P(1)–O(3A)    | 109.2(6)  |
| O(13)–Nd(1)–N(1)  | 149.4(2)   | O(2)–P(1)–C(1)     | 115.7(8)  |
| O(13)–Nd(1)–N(2)  | 25.4(2)    | O(2)–P(1)–O(3)     | 76.4(10)  |
| O(13)–Nd(1)–O(10) | 140.8(2)   | O(2A)–P(1)–C(1)    | 97.7(6)   |
| O(13)–Nd(1)–O(11) | 147.0(2)   | O(2A)–P(1)–O(3A)   | 130.4(9)  |
| O(13)–Nd(1)–O(16) | 122.1(2)   | O(3)–P(1)–C(1)     | 116.5(7)  |
| O(13)–Nd(1)–O(17) | 118.2(2)   | O(3A)–P(1)–C(1)    | 93.4(7)   |
| O(13)–Nd(1)–N(3)  | 124.0(2)   | C(8)–O(2)–P(1)     | 135.3(14) |
| O(14)–Nd(1)–N(1)  | 159.8(2)   | O(2)–C(8)–C(9)     | 111(2)    |
| O(14)–Nd(1)–N(2)  | 25.2(2)    | O(2)–C(8)–C(10)    | 96.8(16)  |
| O(14)–Nd(1)–O(10) | 145.2(2)   | C(9)–C(8)–C(10)    | 105(2)    |
| O(14)–Nd(1)–O(11) | 146.9(2)   | C(8A)–O(2A)–P(1)   | 119.3(14) |
| O(14)–Nd(1)–O(13) | 50.6(2)    | O(2A)–C(8A)–C(9A)  | 115.5(19) |
| O(14)–Nd(1)–O(16) | 76.1(2)    | O(2A)–C(8A)–C(10A) | 133(2)    |
| O(14)–Nd(1)–O(17) | 73.3(2)    | C(10A)–C(8A)–C(9A) | 102.0(19) |
| O(14)–Nd(1)–N(3)  | 73.5(2)    | C(11)–O(3)–P(1)    | 121.7(13) |
| O(16)–Nd(1)–N(1)  | 84.5(2)    | O(3)–C(11)–C(12)   | 105(2)    |
| O(16)–Nd(1)–N(2)  | 98.6(2)    | O(3)–C(11)–C(13)   | 108.8(17) |
| O(16)–Nd(1)–O(10) | 73.8(2)    | C(13)–C(11)–C(12)  | 113.4(18) |

|                      |           |                   |           |
|----------------------|-----------|-------------------|-----------|
| C(11A)–O(3A)–P(1)    | 122.5(17) | O(28)–Nd(2)–N(6)  | 78.4(2)   |
| O(3A)–C(11A)–C(12A)  | 104(2)    | O(28)–Nd(2)–O(29) | 50.0(2)   |
| O(3A)–C(11A)–C(13A)  | 111(2)    | O(28)–Nd(2)–O(31) | 126.7(2)  |
| C(13A)–C(11A)–C(12A) | 111(3)    | O(28)–Nd(2)–O(35) | 84.3(2)   |
| N(5)–Nd(2)–N(4)      | 102.5(2)  | O(28)–Nd(2)–O(34) | 71.1(2)   |
| N(5)–Nd(2)–N(6)      | 165.2(2)  | O(29)–Nd(2)–N(5)  | 99.5(2)   |
| N(6)–Nd(2)–N(4)      | 84.3(2)   | O(29)–Nd(2)–N(4)  | 24.9(2)   |
| O(19)–Nd(2)–N(5)     | 67.6(2)   | O(29)–Nd(2)–N(6)  | 92.2(2)   |
| O(19)–Nd(2)–N(4)     | 97.7(2)   | O(32)–Nd(2)–N(5)  | 25.8(2)   |
| O(19)–Nd(2)–N(6)     | 98.6(2)   | O(32)–Nd(2)–N(4)  | 76.9(2)   |
| O(19)–Nd(2)–O(28)    | 74.5(2)   | O(32)–Nd(2)–N(6)  | 158.9(2)  |
| O(19)–Nd(2)–O(29)    | 119.8(2)  | O(32)–Nd(2)–O(28) | 80.5(2)   |
| O(19)–Nd(2)–O(32)    | 74.6(2)   | O(32)–Nd(2)–O(29) | 74.9(2)   |
| O(19)–Nd(2)–O(31)    | 72.9(2)   | O(32)–Nd(2)–O(31) | 50.8(2)   |
| O(19)–Nd(2)–O(35)    | 123.9(2)  | O(32)–Nd(2)–O(35) | 151.6(2)  |
| O(19)–Nd(2)–O(34)    | 73.5(2)   | O(32)–Nd(2)–O(34) | 141.7(2)  |
| O(22)–Nd(2)–N(5)     | 100.0(2)  | O(31)–Nd(2)–N(5)  | 25.7(2)   |
| O(22)–Nd(2)–N(4)     | 157.5(2)  | O(31)–Nd(2)–N(4)  | 127.7(2)  |
| O(22)–Nd(2)–N(6)     | 73.7(2)   | O(31)–Nd(2)–N(6)  | 147.3(2)  |
| O(22)–Nd(2)–O(19)    | 90.2(2)   | O(31)–Nd(2)–O(29) | 119.8(2)  |
| O(22)–Nd(2)–O(25)    | 85.5(2)   | O(35)–Nd(2)–N(5)  | 168.3(2)  |
| O(22)–Nd(2)–O(28)    | 145.7(2)  | O(35)–Nd(2)–N(4)  | 79.1(2)   |
| O(22)–Nd(2)–O(29)    | 148.8(2)  | O(35)–Nd(2)–N(6)  | 25.5(2)   |
| O(22)–Nd(2)–O(32)    | 125.5(2)  | O(35)–Nd(2)–O(29) | 77.0(2)   |
| O(22)–Nd(2)–O(31)    | 74.8(2)   | O(35)–Nd(2)–O(31) | 149.0(2)  |
| O(22)–Nd(2)–O(35)    | 79.0(2)   | O(34)–Nd(2)–N(5)  | 140.9(2)  |
| O(22)–Nd(2)–O(34)    | 75.2(2)   | O(34)–Nd(2)–N(4)  | 86.9(2)   |
| O(25)–Nd(2)–N(5)     | 86.4(2)   | O(34)–Nd(2)–N(6)  | 25.1(2)   |
| O(25)–Nd(2)–N(4)     | 96.5(2)   | O(34)–Nd(2)–O(29) | 103.6(2)  |
| O(25)–Nd(2)–N(6)     | 106.1(2)  | O(34)–Nd(2)–O(31) | 134.3(2)  |
| O(25)–Nd(2)–O(19)    | 152.5(2)  | O(34)–Nd(2)–O(35) | 50.4(2)   |
| O(25)–Nd(2)–O(28)    | 121.7(2)  | C(7)–C(2)–C(1)    | 119.8(10) |
| O(25)–Nd(2)–O(29)    | 71.7(2)   | C(3)–C(2)–C(1)    | 121.9(10) |
| O(25)–Nd(2)–O(32)    | 85.9(2)   | C(3)–C(2)–C(7)    | 118.3(10) |
| O(25)–Nd(2)–O(31)    | 79.8(2)   | O(13)–N(2)–Nd(1)  | 58.7(4)   |
| O(25)–Nd(2)–O(35)    | 81.9(2)   | O(14)–N(2)–Nd(1)  | 57.8(4)   |
| O(25)–Nd(2)–O(34)    | 130.7(2)  | O(14)–N(2)–O(13)  | 116.3(7)  |
| O(28)–Nd(2)–N(5)     | 102.1(2)  | O(15)–N(2)–Nd(1)  | 174.2(7)  |
| O(28)–Nd(2)–N(4)     | 25.2(2)   | O(15)–N(2)–O(13)  | 121.9(9)  |

|                      |           |                   |           |
|----------------------|-----------|-------------------|-----------|
| O(15)–N(2)–O(14)     | 121.8(9)  | O(28)–N(4)–Nd(2)  | 56.7(4)   |
| O(5)–P(2)–O(6)       | 103.4(4)  | O(29)–N(4)–Nd(2)  | 58.8(4)   |
| O(5)–P(2)–C(14)      | 109.4(4)  | O(29)–N(4)–O(28)  | 115.5(7)  |
| O(4)–P(2)–O(5)       | 112.6(4)  | O(30)–N(4)–Nd(2)  | 176.3(6)  |
| O(4)–P(2)–O(6)       | 114.6(4)  | O(30)–N(4)–O(28)  | 121.3(8)  |
| O(4)–P(2)–C(14)      | 111.7(4)  | O(30)–N(4)–O(29)  | 123.1(8)  |
| O(6)–P(2)–C(14)      | 104.5(4)  | C(5)–C(4)–C(3)    | 121.8(12) |
| O(32)–N(5)–Nd(2)     | 58.3(4)   | C(6)–C(7)–C(2)    | 120.4(13) |
| O(31)–N(5)–Nd(2)     | 60.0(4)   | P(3)–O(7)–Nd(1)   | 149.4(4)  |
| O(31)–N(5)–O(32)     | 115.9(7)  | C(24)–O(6)–P(2)   | 120.1(6)  |
| O(33)–N(5)–Nd(2)     | 164.6(7)  | O(25)–P(6)–O(26)  | 114.9(4)  |
| O(33)–N(5)–O(32)     | 122.3(9)  | O(25)–P(6)–O(27)  | 111.6(4)  |
| O(33)–N(5)–O(31)     | 121.8(9)  | O(25)–P(6)–C(66)  | 112.6(4)  |
| C(4)–C(5)–C(6)       | 117.3(11) | O(26)–P(6)–C(66)  | 103.4(5)  |
| C(21)–O(5)–P(2)      | 123.6(6)  | O(27)–P(6)–O(26)  | 104.1(4)  |
| O(22)–P(5)–O(23)     | 111.7(4)  | O(27)–P(6)–C(66)  | 109.7(5)  |
| O(22)–P(5)–O(24)     | 113.4(4)  | O(36)–N(6)–Nd(2)  | 173.0(8)  |
| O(22)–P(5)–C(53)     | 113.8(5)  | O(36)–N(6)–O(35)  | 121.5(9)  |
| O(23)–P(5)–O(24)     | 106.1(4)  | O(36)–N(6)–O(34)  | 123.2(8)  |
| O(23)–P(5)–C(53)     | 107.9(5)  | O(35)–N(6)–Nd(2)  | 58.0(4)   |
| O(24)–P(5)–C(53)     | 103.4(4)  | O(34)–N(6)–Nd(2)  | 57.8(4)   |
| P(2)–O(4)–Nd(1)      | 153.7(4)  | O(34)–N(6)–O(35)  | 115.3(7)  |
| O(20)–P(4)–C(40)     | 102.3(9)  | C(5)–C(6)–C(7)    | 121.1(14) |
| O(20)–P(4)–O(21)     | 108.2(12) | C(34)–O(8)–P(3)   | 124.9(6)  |
| O(20A)–P(4)–C(40)    | 102.6(13) | C(37)–O(9)–P(3)   | 124.7(5)  |
| O(20A)–P(4)–O(21)    | 102.7(15) | N(1)–O(10)–Nd(1)  | 95.5(4)   |
| O(19)–P(4)–O(20)     | 111.9(14) | N(1)–O(11)–Nd(1)  | 96.7(4)   |
| O(19)–P(4)–O(20A)    | 116.8(16) | N(2)–O(13)–Nd(1)  | 95.9(5)   |
| O(19)–P(4)–C(40)     | 112.8(4)  | N(2)–O(14)–Nd(1)  | 97.0(5)   |
| O(19)–P(4)–O(21)     | 112.5(4)  | C(15)–C(14)–P(2)  | 117.2(6)  |
| O(21)–P(4)–C(40)     | 108.5(4)  | C(20)–C(15)–C(14) | 120.5(9)  |
| C(47)–O(20)–P(4)     | 130(2)    | C(20)–C(15)–C(16) | 118.6(9)  |
| O(20)–C(47)–C(49)    | 108(2)    | C(16)–C(15)–C(14) | 120.9(9)  |
| C(48)–C(47)–O(20)    | 112(2)    | C(15)–C(20)–C(19) | 121.0(10) |
| C(48)–C(47)–C(49)    | 118(5)    | C(17)–C(16)–C(15) | 119.7(10) |
| C(47A)–O(20A)–P(4)   | 127(3)    | N(3)–O(16)–Nd(1)  | 97.8(5)   |
| O(20A)–C(47A)–C(48A) | 110(3)    | C(19)–C(18)–C(17) | 121.2(10) |
| O(20A)–C(47A)–C(49A) | 105(2)    | C(18)–C(17)–C(16) | 120.1(11) |
| C(48A)–C(47A)–C(49A) | 113(4)    | N(3)–O(17)–Nd(1)  | 97.9(5)   |

|                   |           |                   |           |
|-------------------|-----------|-------------------|-----------|
| P(4)–O(19)–Nd(2)  | 141.4(4)  | C(62)–C(60)–C(61) | 112.6(11) |
| C(18)–C(19)–C(20) | 119.4(10) | O(24)–C(63)–C(64) | 106.8(10) |
| C(41)–C(40)–P(4)  | 113.8(7)  | O(24)–C(63)–C(65) | 108.5(10) |
| C(43)–C(42)–C(41) | 122.2(11) | C(65)–C(63)–C(64) | 112.8(12) |
| C(42)–C(41)–C(40) | 119.8(10) | C(67)–C(66)–P(6)  | 113.5(7)  |
| C(46)–C(41)–C(40) | 121.9(9)  | C(68)–C(67)–C(66) | 120.0(9)  |
| C(46)–C(41)–C(42) | 118.3(10) | C(72)–C(67)–C(66) | 122.4(9)  |
| C(42)–C(43)–C(44) | 118.8(11) | C(72)–C(67)–C(68) | 117.5(9)  |
| C(41)–C(46)–C(45) | 120.8(10) | C(67)–C(68)–C(69) | 121.4(10) |
| C(46)–C(45)–C(44) | 120.2(11) | C(70)–C(69)–C(68) | 119.2(9)  |
| C(43)–C(44)–C(45) | 119.8(10) | C(69)–C(70)–C(71) | 120.9(9)  |
| P(5)–O(22)–Nd(2)  | 171.8(4)  | C(70)–C(71)–C(72) | 119.1(9)  |
| C(23)–C(21)–O(5)  | 108.2(8)  | C(67)–C(72)–C(71) | 121.9(9)  |
| C(23)–C(21)–C(22) | 112.1(8)  | O(26)–C(73)–C(74) | 107.0(10) |
| C(50)–O(21)–P(4)  | 124.2(6)  | O(26)–C(73)–C(75) | 107.1(9)  |
| C(60)–O(23)–P(5)  | 125.3(6)  | C(75)–C(73)–C(74) | 114.7(10) |
| C(25)–C(24)–O(6)  | 107.6(9)  | O(27)–C(76)–C(77) | 106.7(9)  |
| C(25)–C(24)–C(26) | 111.8(11) | O(27)–C(76)–C(78) | 108.9(9)  |
| C(26)–C(24)–O(6)  | 107.8(10) | C(78)–C(76)–C(77) | 113.1(10) |
| C(63)–O(24)–P(5)  | 119.2(7)  | N(5)–O(32)–Nd(2)  | 96.0(5)   |
| P(6)–O(25)–Nd(2)  | 150.1(4)  | N(5)–O(31)–Nd(2)  | 94.3(5)   |
| C(73)–O(26)–P(6)  | 123.9(7)  | N(6)–O(35)–Nd(2)  | 96.5(5)   |
| C(76)–O(27)–P(6)  | 122.9(6)  | O(8)–C(34)–C(36)  | 109.8(8)  |
| N(4)–O(28)–Nd(2)  | 98.1(5)   | O(8)–C(34)–C(35)  | 106.0(8)  |
| N(4)–O(29)–Nd(2)  | 96.3(5)   | C(35)–C(34)–C(36) | 113.6(11) |
| O(21)–C(50)–C(51) | 104.4(7)  | N(6)–O(34)–Nd(2)  | 97.1(5)   |
| C(52)–C(50)–O(21) | 109.6(8)  | O(9)–C(37)–C(38)  | 105.6(7)  |
| C(52)–C(50)–C(51) | 114.4(9)  | O(9)–C(37)–C(39)  | 109.0(10) |
| C(54)–C(53)–P(5)  | 114.2(7)  | C(39)–C(37)–C(38) | 113.7(9)  |
| C(55)–C(54)–C(53) | 121.1(10) | O(7)–P(3)–O(8)    | 114.0(4)  |
| C(59)–C(54)–C(53) | 119.1(9)  | O(7)–P(3)–O(9)    | 113.0(4)  |
| C(59)–C(54)–C(55) | 119.8(10) | O(7)–P(3)–C(27)   | 113(2)    |
| C(56)–C(55)–C(54) | 119.8(10) | O(7)–P(3)–C(27A)  | 110.0(6)  |
| C(57)–C(56)–C(55) | 120.6(11) | O(8)–P(3)–C(27)   | 102(3)    |
| C(56)–C(57)–C(58) | 120.5(11) | O(8)–P(3)–C(27A)  | 104.6(9)  |
| C(57)–C(58)–C(59) | 119.5(11) | O(9)–P(3)–O(8)    | 106.2(4)  |
| C(54)–C(59)–C(58) | 119.7(10) | O(9)–P(3)–C(27)   | 108(2)    |
| O(23)–C(60)–C(61) | 108.0(9)  | O(9)–P(3)–C(27A)  | 108.6(7)  |
| O(23)–C(60)–C(62) | 107.3(11) | C(28)–C(27)–P(3)  | 117(4)    |



|                      |           |                      |           |
|----------------------|-----------|----------------------|-----------|
| C(29)–C(28)–C(27)    | 117(4)    | C(31A)–C(30A)–C(29A) | 118(2)    |
| C(33)–C(28)–C(27)    | 122(4)    | C(30A)–C(31A)–C(32A) | 123.3(16) |
| C(33)–C(28)–C(29)    | 120(3)    | C(31A)–C(32A)–C(33A) | 119(2)    |
| C(30)–C(29)–C(28)    | 119(4)    | C(28A)–C(33A)–C(32A) | 120(2)    |
| C(31)–C(30)–C(29)    | 118(4)    | C(2)–C(3)–C(4)       | 120.9(12) |
| C(32)–C(31)–C(30)    | 125(4)    | O(16)–N(3)–Nd(1)     | 57.3(4)   |
| C(31)–C(32)–C(33)    | 117(4)    | O(16)–N(3)–O(17)     | 114.3(7)  |
| C(28)–C(33)–C(32)    | 121(4)    | O(18)–N(3)–Nd(1)     | 177.7(7)  |
| C(28A)–C(27A)–P(3)   | 113.7(11) | O(18)–N(3)–O(16)     | 121.9(9)  |
| C(29A)–C(28A)–C(27A) | 118.4(15) | O(18)–N(3)–O(17)     | 123.8(8)  |
| C(33A)–C(28A)–C(27A) | 121.3(16) | O(17)–N(3)–Nd(1)     | 57.0(4)   |
| C(33A)–C(28A)–C(29A) | 120.3(15) |                      |           |
| C(30A)–C(29A)–C(28A) | 119.9(19) |                      |           |

## checkCIF/PLATON report

Structure factors have been supplied for datablock(s) i2902

THIS REPORT IS FOR GUIDANCE ONLY. IF USED AS PART OF A REVIEW PROCEDURE FOR PUBLICATION, IT SHOULD NOT REPLACE THE EXPERTISE OF AN EXPERIENCED CRYSTALLOGRAPHIC REFEREE.

No syntax errors found. CIF dictionary Interpreting this report

### Datablock: i2902

---

|                 |                      |                      |              |
|-----------------|----------------------|----------------------|--------------|
| Bond precision: | C-C = 0.0159 A       | Wavelength=0.71073   |              |
| Cell:           | a=15.3724(7)         | b=20.4341(6)         | c=16.3173(6) |
|                 | alpha=90             | beta=97.312(3)       | gamma=90     |
| Temperature:    | 100 K                |                      |              |
|                 | Calculated           | Reported             |              |
| Volume          | 5083.9(3)            | 5083.9(3)            |              |
| Space group     | P 21                 | P 1 21 1             |              |
| Hall group      | P 2yb                | P 2yb                |              |
| Moiety formula  | C39 H63 N3 Nd O18 P3 | C39 H63 N3 Nd O18 P3 |              |
| Sum formula     | C39 H63 N3 Nd O18 P3 | C39 H63 N3 Nd O18 P3 |              |
| Mr              | 1099.08              | 1099.07              |              |
| Dx,g cm-3       | 1.436                | 1.436                |              |
| Z               | 4                    | 4                    |              |
| Mu (mm-1)       | 1.185                | 1.185                |              |

|           |              |             |
|-----------|--------------|-------------|
| F000      | 2268.0       | 2268.0      |
| F000'     | 2269.51      |             |
| h,k,lmax  | 18,24,19     | 18,24,19    |
| Nref      | 19375[ 9978] | 19054       |
| Tmin,Tmax | 0.855,0.965  | 0.326,0.918 |
| Tmin'     | 0.798        |             |

Correction method= # Reported T Limits: Tmin=0.326 Tmax=0.918 AbsCorr = MULTI-SCAN

Data completeness= 1.91/0.98      Theta(max)= 25.720 R(reflections)= 0.0432( 16024)

wR2(reflections)= 0.1162( 19054)

S = 1.035

Npar= 1340

The following ALERTS were generated. Each ALERT has the format

**test-name\_ALERT\_alert-type\_alert-level.**

Click on the hyperlinks for more details of the test.

### Alert level C

|                                                                       |           |
|-----------------------------------------------------------------------|-----------|
| PLAT090_ALERT_3_C Poor Data / Parameter Ratio (Zmax > 18) .....       | 7.37 Note |
| PLAT220_ALERT_2_C NonSolvent Resd 1    C    Ueq(max) / Ueq(min) Range | 3.5 Ratio |
| PLAT222_ALERT_3_C NonSolvent Resd 1    H    Uiso(max)/Uiso(min) Range | 4.2 Ratio |
| PLAT234_ALERT_4_C Large Hirshfeld Difference    O2A--C8A    .         | 0.18 Ang. |
| PLAT241_ALERT_2_C High    'MainMol' Ueq as Compared to Neighbors of   | C6 Check  |
| PLAT241_ALERT_2_C High    'MainMol' Ueq as Compared to Neighbors of   | C7 Check  |
| PLAT242_ALERT_2_C Low    'MainMol' Ueq as Compared to Neighbors of    | C2 Check  |
| PLAT242_ALERT_2_C Low    'MainMol' Ueq as Compared to Neighbors of    | C5 Check  |
| PLAT242_ALERT_2_C Low    'MainMol' Ueq as Compared to Neighbors of    | C24 Check |
| PLAT242_ALERT_2_C Low    'MainMol' Ueq as Compared to Neighbors of    | C37 Check |
| PLAT242_ALERT_2_C Low    'MainMol' Ueq as Compared to Neighbors of    | C60 Check |
| PLAT242_ALERT_2_C Low    'MainMol' Ueq as Compared to Neighbors of    | C63 Check |
| PLAT342_ALERT_3_C Low Bond Precision on C-C Bonds ..... 0.01589 Ang.  |           |
| PLAT911_ALERT_3_C Missing FCF Refl Between Thmin & STh/L= 0.600       | 5 Report  |
| PLAT918_ALERT_3_C Reflection(s) with I(obs) much Smaller I(calc) .    | 1 Check   |

### Alert level G

|                                                                      |           |
|----------------------------------------------------------------------|-----------|
| PLAT002_ALERT_2_G Number of Distance or Angle Restraints on AtSite   | 46 Note   |
| PLAT003_ALERT_2_G Number of Uiso or Uij Restrained non-H Atoms ...   | 38 Report |
| PLAT083_ALERT_2_G SHELXL Second Parameter in WGHT    Unusually Large | 6.82 Why? |
| PLAT171_ALERT_4_G The CIF-Embedded .res File Contains EADP Records   | 3 Report  |

|                   |                                                  |       |        |        |
|-------------------|--------------------------------------------------|-------|--------|--------|
| PLAT175_ALERT_4_G | The CIF-Embedded .res File Contains SAME Records |       | 5      | Report |
| PLAT178_ALERT_4_G | The CIF-Embedded .res File Contains SIMU Records |       | 8      | Report |
| PLAT187_ALERT_4_G | The CIF-Embedded .res File Contains RIGU Records |       | 4      | Report |
| PLAT301_ALERT_3_G | Main Residue Disorder .....(Resd 1)              |       | 23%    | Note   |
| PLAT301_ALERT_3_G | Main Residue Disorder .....(Resd 2)              |       | 6%     | Note   |
| PLAT395_ALERT_2_G | Deviating X-O-Y Angle From 120 for O2            |       | 135.3  | Degree |
| PLAT395_ALERT_2_G | Deviating X-O-Y Angle From 120 for O20           |       | 130.2  | Degree |
| PLAT720_ALERT_4_G | Number of Unusual/Non-Standard Labels .....      |       | 3      | Note   |
| PLAT794_ALERT_5_G | Tentative Bond Valency for Nd1 (II)              | .     | 2.20   | Info   |
| PLAT794_ALERT_5_G | Tentative Bond Valency for Nd2 (II)              | .     | 2.18   | Info   |
| PLAT860_ALERT_3_G | Number of Least-Squares Restraints .....         |       | 329    | Note   |
| PLAT883_ALERT_1_G | No Info/Value for _atom_sites_solution_primary . |       | Please | Do !   |
| PLAT912_ALERT_4_G | Missing # of FCF Reflections Above STh/L=        | 0.600 | 96     | Note   |
| PLAT933_ALERT_2_G | Number of OMIT Records in Embedded .res File ... |       | 8      | Note   |
| PLAT941_ALERT_3_G | Average HKL Measurement Multiplicity .....       |       | 3.6    | Low    |
| PLAT978_ALERT_2_G | Number C-C Bonds with Positive Residual Density. |       | 0      | Info   |

## 2.4 Complex 3

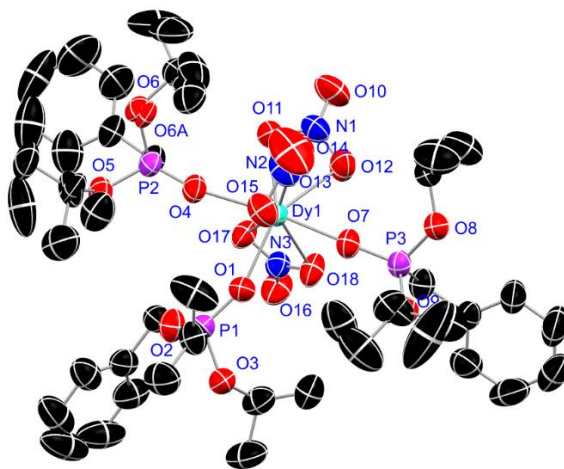

Figure 43: Asymmetric unit of **3**.

**3** crystallizes in the space group  $P2_1/n$ . Three of the six *i*Pr residues are disordered about two positions. One disorder also includes the bridging O-atom. They are refined with distance restraints and partially with restraints for the anisotropic displacement parameters. The occupancy of the minor positions refined to 0.422(11), 0.414(29) and 0.441(32), respectively.

Bond lengths [Å] and angles [°] of **3**.

|             |           |               |           |
|-------------|-----------|---------------|-----------|
| C(1)–C(2)   | 1.502(4)  | C(24)–C(26)   | 1.489(12) |
| C(1)–P(1)   | 1.785(3)  | O(6A)–C(24A)  | 1.468(14) |
| C(2)–C(3)   | 1.371(5)  | O(6A)–P(2)    | 1.60(3)   |
| C(2)–C(7)   | 1.383(5)  | C(24A)–C(25A) | 1.489(16) |
| C(3)–C(4)   | 1.380(6)  | C(24A)–C(26A) | 1.489(15) |
| C(4)–C(5)   | 1.355(9)  | C(27)–C(28)   | 1.507(4)  |
| C(5)–C(6)   | 1.346(9)  | C(27)–P(3)    | 1.778(3)  |
| C(6)–C(7)   | 1.384(7)  | C(28)–C(29)   | 1.356(5)  |
| C(8)–C(9)   | 1.469(6)  | C(28)–C(33)   | 1.361(5)  |
| C(8)–C(10)  | 1.487(5)  | C(29)–C(30)   | 1.403(6)  |
| C(8)–O(2)   | 1.463(4)  | C(30)–C(31)   | 1.367(7)  |
| C(11)–C(12) | 1.496(6)  | C(31)–C(32)   | 1.312(7)  |
| C(11)–C(13) | 1.466(6)  | C(32)–C(33)   | 1.379(6)  |
| C(11)–O(3)  | 1.444(4)  | C(34)–C(35)   | 1.492(6)  |
| C(14)–C(15) | 1.491(4)  | C(34)–C(36)   | 1.457(6)  |
| C(14)–P(2)  | 1.778(3)  | C(34)–O(8)    | 1.466(4)  |
| O(6)–C(24)  | 1.465(10) | O(9)–C(37)    | 1.458(8)  |
| O(6)–P(2)   | 1.54(2)   | O(9)–C(37A)   | 1.466(12) |
| C(24)–C(25) | 1.486(12) | O(9)–P(3)     | 1.552(2)  |

|                |            |                      |           |
|----------------|------------|----------------------|-----------|
| C(37)–C(38)    | 1.486(12)  | C(7)–C(2)–C(1)       | 119.8(4)  |
| C(37)–C(39)    | 1.473(12)  | C(2)–C(3)–C(4)       | 120.8(5)  |
| C(37A)–C(38A)  | 1.485(15)  | C(5)–C(4)–C(3)       | 120.4(6)  |
| C(37A)–C(39A)  | 1.468(16)  | C(6)–C(5)–C(4)       | 119.7(5)  |
| Dy(1)–O(1)     | 2.286(2)   | C(5)–C(6)–C(7)       | 121.1(5)  |
| Dy(1)–O(4)     | 2.318(2)   | C(2)–C(7)–C(6)       | 119.7(5)  |
| Dy(1)–O(7)     | 2.2856(19) | C(9)–C(8)–C(10)      | 112.2(3)  |
| Dy(1)–O(11)    | 2.465(2)   | O(2)–C(8)–C(9)       | 109.7(3)  |
| Dy(1)–O(12)    | 2.458(2)   | O(2)–C(8)–C(10)      | 107.5(3)  |
| Dy(1)–O(14)    | 2.438(2)   | C(13)–C(11)–C(12)    | 113.4(4)  |
| Dy(1)–O(15)    | 2.462(2)   | O(3)–C(11)–C(12)     | 105.9(4)  |
| Dy(1)–O(17)    | 2.442(2)   | O(3)–C(11)–C(13)     | 111.4(3)  |
| Dy(1)–O(18)    | 2.466(2)   | C(15)–C(14)–P(2)     | 115.7(2)  |
| N(1)–O(10)     | 1.211(4)   | C(20)–C(15)–C(14)    | 120.1(2)  |
| N(1)–O(11)     | 1.256(3)   | C(16)–C(15)–C(14)    | 119.9(2)  |
| N(1)–O(12)     | 1.258(4)   | C(24)–O(6)–P(2)      | 123.9(15) |
| N(2)–O(13)     | 1.212(4)   | O(6)–C(24)–C(25)     | 109.0(10) |
| N(2)–O(14)     | 1.259(4)   | O(6)–C(24)–C(26)     | 107.8(10) |
| N(2)–O(15)     | 1.257(4)   | C(25)–C(24)–C(26)    | 111.4(9)  |
| N(3)–O(16)     | 1.213(3)   | C(24A)–O(6A)–P(2)    | 123(2)    |
| N(3)–O(17)     | 1.264(3)   | O(6A)–C(24A)–C(25A)  | 106.0(15) |
| N(3)–O(18)     | 1.253(3)   | O(6A)–C(24A)–C(26A)  | 105.8(15) |
| O(1)–P(1)      | 1.470(2)   | C(26A)–C(24A)–C(25A) | 111.7(12) |
| O(2)–P(1)      | 1.561(2)   | C(28)–C(27)–P(3)     | 116.7(2)  |
| O(3)–P(1)      | 1.547(2)   | C(29)–C(28)–C(27)    | 119.7(3)  |
| O(4)–P(2)      | 1.479(2)   | C(29)–C(28)–C(33)    | 117.9(4)  |
| O(7)–P(3)      | 1.479(2)   | C(33)–C(28)–C(27)    | 122.3(3)  |
| O(8)–P(3)      | 1.560(2)   | C(28)–C(29)–C(30)    | 120.4(4)  |
| P(2)–O(5)      | 1.555(2)   | C(31)–C(30)–C(29)    | 120.1(4)  |
| O(5)–C(21)     | 1.476(9)   | C(32)–C(31)–C(30)    | 118.8(4)  |
| O(5)–C(21A)    | 1.457(11)  | C(31)–C(32)–C(33)    | 122.1(5)  |
| C(21)–C(22)    | 1.518(15)  | C(28)–C(33)–C(32)    | 120.8(4)  |
| C(21)–C(23)    | 1.45(2)    | C(36)–C(34)–C(35)    | 113.3(4)  |
| C(21A)–C(22A)  | 1.518(17)  | C(36)–C(34)–O(8)     | 107.9(4)  |
| C(21A)–C(23A)  | 1.42(2)    | O(8)–C(34)–C(35)     | 107.6(4)  |
|                |            | C(37)–O(9)–P(3)      | 122.6(7)  |
| C(2)–C(1)–P(1) | 114.5(2)   | C(37A)–O(9)–P(3)     | 119.0(11) |
| C(3)–C(2)–C(1) | 121.8(3)   | O(9)–C(37)–C(38)     | 106.3(9)  |
| C(3)–C(2)–C(7) | 118.3(4)   | O(9)–C(37)–C(39)     | 106.2(8)  |

|                      |           |                   |           |
|----------------------|-----------|-------------------|-----------|
| C(39)–C(37)–C(38)    | 111.9(11) | O(11)–Dy(1)–N(3)  | 89.09(8)  |
| O(9)–C(37A)–C(38A)   | 110.1(14) | O(11)–Dy(1)–O(18) | 102.88(8) |
| O(9)–C(37A)–C(39A)   | 110.2(16) | O(12)–Dy(1)–N(1)  | 25.67(8)  |
| C(39A)–C(37A)–C(38A) | 111.7(19) | O(12)–Dy(1)–N(2)  | 97.34(9)  |
| N(2)–Dy(1)–N(1)      | 94.86(9)  | O(12)–Dy(1)–N(3)  | 81.73(8)  |
| N(2)–Dy(1)–N(3)      | 173.83(9) | O(12)–Dy(1)–O(11) | 51.16(8)  |
| N(3)–Dy(1)–N(1)      | 86.92(8)  | O(12)–Dy(1)–O(15) | 121.80(8) |
| O(1)–Dy(1)–N(1)      | 162.43(8) | O(12)–Dy(1)–O(18) | 74.93(9)  |
| O(1)–Dy(1)–N(2)      | 102.63(9) | O(14)–Dy(1)–N(1)  | 69.04(8)  |
| O(1)–Dy(1)–N(3)      | 75.86(8)  | O(14)–Dy(1)–N(2)  | 25.84(9)  |
| O(1)–Dy(1)–O(4)      | 81.84(8)  | O(14)–Dy(1)–N(3)  | 155.02(8) |
| O(1)–Dy(1)–O(11)     | 147.48(8) | O(14)–Dy(1)–O(11) | 72.31(9)  |
| O(1)–Dy(1)–O(12)     | 148.91(8) | O(14)–Dy(1)–O(12) | 73.65(9)  |
| O(1)–Dy(1)–O(14)     | 128.47(8) | O(14)–Dy(1)–O(15) | 51.63(8)  |
| O(1)–Dy(1)–O(15)     | 76.92(8)  | O(14)–Dy(1)–O(17) | 146.12(8) |
| O(1)–Dy(1)–O(17)     | 80.49(8)  | O(14)–Dy(1)–O(18) | 142.33(8) |
| O(1)–Dy(1)–O(18)     | 75.53(8)  | O(15)–Dy(1)–N(1)  | 120.44(8) |
| O(4)–Dy(1)–N(1)      | 98.57(8)  | O(15)–Dy(1)–N(2)  | 25.85(9)  |
| O(4)–Dy(1)–N(2)      | 83.78(9)  | O(15)–Dy(1)–N(3)  | 152.57(8) |
| O(4)–Dy(1)–N(3)      | 101.82(7) | O(15)–Dy(1)–O(11) | 116.19(9) |
| O(4)–Dy(1)–O(11)     | 73.13(8)  | O(15)–Dy(1)–O(18) | 139.55(9) |
| O(4)–Dy(1)–O(12)     | 124.23(8) | O(17)–Dy(1)–N(1)  | 82.47(8)  |
| O(4)–Dy(1)–O(14)     | 88.86(8)  | O(17)–Dy(1)–N(2)  | 160.25(9) |
| O(4)–Dy(1)–O(15)     | 77.45(8)  | O(17)–Dy(1)–N(3)  | 25.88(7)  |
| O(4)–Dy(1)–O(17)     | 77.32(7)  | O(17)–Dy(1)–O(11) | 74.10(8)  |
| O(4)–Dy(1)–O(18)     | 126.38(7) | O(17)–Dy(1)–O(12) | 88.70(8)  |
| O(7)–Dy(1)–N(1)      | 99.61(8)  | O(17)–Dy(1)–O(15) | 148.12(8) |
| O(7)–Dy(1)–N(2)      | 74.03(9)  | O(17)–Dy(1)–O(18) | 51.56(7)  |
| O(7)–Dy(1)–N(3)      | 99.86(7)  | O(18)–Dy(1)–N(1)  | 90.51(8)  |
| O(7)–Dy(1)–O(1)      | 86.99(8)  | O(18)–Dy(1)–N(2)  | 148.20(9) |
| O(7)–Dy(1)–O(4)      | 152.30(8) | O(18)–Dy(1)–N(3)  | 25.70(7)  |
| O(7)–Dy(1)–O(11)     | 124.39(8) | O(10)–N(1)–Dy(1)  | 173.1(2)  |
| O(7)–Dy(1)–O(12)     | 75.83(8)  | O(10)–N(1)–O(11)  | 121.4(3)  |
| O(7)–Dy(1)–O(14)     | 78.41(8)  | O(10)–N(1)–O(12)  | 123.1(3)  |
| O(7)–Dy(1)–O(15)     | 75.35(8)  | O(11)–N(1)–Dy(1)  | 58.16(15) |
| O(7)–Dy(1)–O(17)     | 125.73(7) | O(11)–N(1)–O(12)  | 115.5(3)  |
| O(7)–Dy(1)–O(18)     | 74.17(7)  | O(12)–N(1)–Dy(1)  | 57.86(15) |
| O(11)–Dy(1)–N(1)     | 25.64(8)  | O(13)–N(2)–Dy(1)  | 174.8(3)  |
| O(11)–Dy(1)–N(2)     | 95.08(10) | O(13)–N(2)–O(14)  | 121.9(4)  |

|                  |            |                      |            |
|------------------|------------|----------------------|------------|
| O(13)–N(2)–O(15) | 122.2(4)   | O(3)–P(1)–O(2)       | 102.45(13) |
| O(14)–N(2)–Dy(1) | 57.56(16)  | O(6)–P(2)–C(14)      | 106.8(8)   |
| O(15)–N(2)–Dy(1) | 58.62(16)  | O(6)–P(2)–O(5)       | 102.5(7)   |
| O(15)–N(2)–O(14) | 116.0(3)   | O(6A)–P(2)–C(14)     | 114.1(13)  |
| O(16)–N(3)–Dy(1) | 176.8(2)   | O(4)–P(2)–C(14)      | 112.10(14) |
| O(16)–N(3)–O(17) | 121.9(2)   | O(4)–P(2)–O(6)       | 116.3(6)   |
| O(16)–N(3)–O(18) | 122.1(3)   | O(4)–P(2)–O(6A)      | 108.3(10)  |
| O(17)–N(3)–Dy(1) | 57.53(14)  | O(4)–P(2)–O(5)       | 114.08(13) |
| O(18)–N(3)–Dy(1) | 58.58(14)  | O(5)–P(2)–C(14)      | 103.86(15) |
| O(18)–N(3)–O(17) | 116.0(2)   | O(5)–P(2)–O(6A)      | 104.2(11)  |
| P(1)–O(1)–Dy(1)  | 156.34(14) | O(9)–P(3)–C(27)      | 103.89(15) |
| C(8)–O(2)–P(1)   | 122.8(2)   | O(9)–P(3)–O(8)       | 104.50(13) |
| C(11)–O(3)–P(1)  | 125.6(2)   | O(7)–P(3)–C(27)      | 112.74(13) |
| P(2)–O(4)–Dy(1)  | 151.40(14) | O(7)–P(3)–O(9)       | 113.72(13) |
| P(3)–O(7)–Dy(1)  | 159.09(14) | O(7)–P(3)–O(8)       | 112.00(13) |
| C(34)–O(8)–P(3)  | 124.3(2)   | O(8)–P(3)–C(27)      | 109.38(15) |
| N(1)–O(11)–Dy(1) | 96.20(18)  | C(21)–O(5)–P(2)      | 126.8(7)   |
| N(1)–O(12)–Dy(1) | 96.48(17)  | C(21A)–O(5)–P(2)     | 122.9(7)   |
| N(2)–O(14)–Dy(1) | 96.60(19)  | O(5)–C(21)–C(22)     | 107.5(9)   |
| N(2)–O(15)–Dy(1) | 95.5(2)    | C(23)–C(21)–O(5)     | 109.3(12)  |
| N(3)–O(17)–Dy(1) | 96.59(16)  | C(23)–C(21)–C(22)    | 113.7(12)  |
| N(3)–O(18)–Dy(1) | 95.72(16)  | O(5)–C(21A)–C(22A)   | 103.6(11)  |
| O(1)–P(1)–C(1)   | 112.31(14) | C(23A)–C(21A)–O(5)   | 112.6(11)  |
| O(1)–P(1)–O(2)   | 113.83(14) | C(23A)–C(21A)–C(22A) | 115.3(13)  |
| O(1)–P(1)–O(3)   | 113.81(13) |                      |            |
| O(2)–P(1)–C(1)   | 103.80(15) |                      |            |
| O(3)–P(1)–C(1)   | 109.78(14) |                      |            |

### ***checkCIF/PLATON report***

Structure factors have been supplied for datablock(s) i2894

THIS REPORT IS FOR GUIDANCE ONLY. IF USED AS PART OF A REVIEW PROCEDURE FOR PUBLICATION, IT SHOULD NOT REPLACE THE EXPERTISE OF AN EXPERIENCED CRYSTALLOGRAPHIC REFEREE.

No syntax errors found. CIF dictionary Interpreting this report

**Datablock: i2894**

---

Bond precision: C-C = 0.0061 Å Wavelength=0.71073

Cell: a=15.0470(5) b=21.2523(7) c=16.3650(6)  
 alpha=90 beta=97.899(3) gamma=90  
 Temperature: 100 K

|                | Calculated           | Reported             |
|----------------|----------------------|----------------------|
| Volume         | 5183.6(3)            | 5183.6(3)            |
| Space group    | P 21/n               | P 1 21/n 1           |
| Hall group     | -P 2yn               | -P 2yn               |
| Moiety formula | C39 H63 Dy N3 O18 P3 | C39 H63 Dy N3 O18 P3 |
| Sum formula    | C39 H63 Dy N3 O18 P3 | C39 H63 Dy N3 O18 P3 |
| Mr             | 1117.34              | 1117.33              |
| Dx,g cm-3      | 1.432                | 1.432                |
| Z              | 4                    | 4                    |
| Mu (mm-1)      | 1.602                | 1.602                |
| F000           | 2292.0               | 2292.0               |
| F000'          | 2293.52              |                      |
| h,k,lmax       | 18,25,19             | 18,25,19             |
| Nref           | 9870                 | 9767                 |
| Tmin,Tmax      | 0.726,0.907          | 0.678,1.000          |
| Tmin'          | 0.685                |                      |

Correction method= # Reported T Limits: Tmin=0.678 Tmax=1.000 AbsCorr = MULTI-SCAN

Data completeness= 0.990 Theta(max)= 25.719

R(reflections)= 0.0286( 8484)

wR2(reflections)= 0.0751( 9767)

S = 1.037

Npar= 676

---

The following ALERTS were generated. Each ALERT has the format

**test-name\_ALERT\_alert-type\_alert-level.**

Click on the hyperlinks for more details of the test.

---

**Alert level C**

|                                              |             |                           |           |
|----------------------------------------------|-------------|---------------------------|-----------|
| PLAT220_ALERT_2_C NonSolvent Resd 1          | C           | Ueq(max) / Ueq(min) Range | 3.9 Ratio |
| PLAT222_ALERT_3_C NonSolvent Resd 1          | H           | Uiso(max)/Uiso(min) Range | 4.7 Ratio |
| PLAT230_ALERT_2_C Hirshfeld Test Diff for    | C30 --C31   | .                         | 6.0 s.u.  |
| PLAT234_ALERT_4_C Large Hirshfeld Difference | C21 --C23   | .                         | 0.19 Ang. |
| PLAT234_ALERT_4_C Large Hirshfeld Difference | C24 --C25   | .                         | 0.18 Ang. |
| PLAT234_ALERT_4_C Large Hirshfeld Difference | C37 --C39   | .                         | 0.18 Ang. |
| PLAT241_ALERT_2_C High 'MainMol' Ueq as      | Compared to | Neighbors of              | O12 Check |



|                   |                                                    |                              |              |      |        |
|-------------------|----------------------------------------------------|------------------------------|--------------|------|--------|
| PLAT241_ALERT_2_C | High                                               | 'MainMol' Ueq as Compared to | Neighbors of | O18  | Check  |
| PLAT241_ALERT_2_C | High                                               | 'MainMol' Ueq as Compared to | Neighbors of | C5   | Check  |
| PLAT241_ALERT_2_C | High                                               | 'MainMol' Ueq as Compared to | Neighbors of | C17  | Check  |
| PLAT241_ALERT_2_C | High                                               | 'MainMol' Ueq as Compared to | Neighbors of | C19  | Check  |
| PLAT241_ALERT_2_C | High                                               | 'MainMol' Ueq as Compared to | Neighbors of | C30  | Check  |
| PLAT241_ALERT_2_C | High                                               | 'MainMol' Ueq as Compared to | Neighbors of | C32  | Check  |
| PLAT242_ALERT_2_C | Low                                                | 'MainMol' Ueq as Compared to | Neighbors of | Dy1  | Check  |
| PLAT242_ALERT_2_C | Low                                                | 'MainMol' Ueq as Compared to | Neighbors of | C8   | Check  |
| PLAT242_ALERT_2_C | Low                                                | 'MainMol' Ueq as Compared to | Neighbors of | C11  | Check  |
| PLAT242_ALERT_2_C | Low                                                | 'MainMol' Ueq as Compared to | Neighbors of | C15  | Check  |
| PLAT242_ALERT_2_C | Low                                                | 'MainMol' Ueq as Compared to | Neighbors of | C28  | Check  |
| PLAT242_ALERT_2_C | Low                                                | 'MainMol' Ueq as Compared to | Neighbors of | C34  | Check  |
| PLAT331_ALERT_2_C | <i>Small Aver Phenyl C-C Dist C28</i>              |                              | --C33        | 1.36 | Ang.   |
| PLAT911_ALERT_3_C | <i>Missing FCF Refl Between Thmin &amp; STh/L=</i> |                              | 0.600        | 6    | Report |
| PLAT913_ALERT_3_C | Missing # of Very Strong Reflections in FCF ....   |                              |              | 4    | Note   |

| Alert level       | G |                                                  |               |   |             |
|-------------------|---|--------------------------------------------------|---------------|---|-------------|
| PLAT002_ALERT_2_G |   | Number of Distance or Angle Restraints on AtSite |               |   | 22 Note     |
| PLAT003_ALERT_2_G |   | Number of Uiso or Uij Restrained non-H Atoms ... |               |   | 11 Report   |
| PLAT175_ALERT_4_G |   | The CIF-Embedded .res File Contains SAME Records |               |   | 3 Report    |
| PLAT187_ALERT_4_G |   | The CIF-Embedded .res File Contains RIGU Records |               |   | 3 Report    |
| PLAT232_ALERT_2_G |   | Hirshfeld Test Diff (M-X)                        | Dy1 --O11     | . | 6.8 s.u.    |
| PLAT232_ALERT_2_G |   | Hirshfeld Test Diff (M-X)                        | Dy1 --O12     | . | 6.9 s.u.    |
| PLAT232_ALERT_2_G |   | Hirshfeld Test Diff (M-X)                        | Dy1 --O17     | . | 5.7 s.u.    |
| PLAT301_ALERT_3_G |   | Main Residue Disorder .....(Resd                 | 1 )           |   | 16% Note    |
| PLAT793_ALERT_4_G |   | Model has Chirality at P3                        | (Centro SPGR) |   | S Verify    |
| PLAT794_ALERT_5_G |   | Tentative Bond Valency for Dy1                   | (III)         | . | 3.11 Info   |
| PLAT860_ALERT_3_G |   | Number of Least-Squares Restraints .....         |               |   | 42 Note     |
| PLAT883_ALERT_1_G |   | No Info/Value for _atom_sites_solution_primary . |               |   | Please Do ! |
| PLAT912_ALERT_4_G |   | Missing # of FCF Reflections Above STh/L=        | 0.600         |   | 98 Note     |
| PLAT933_ALERT_2_G |   | Number of OMIT Records in Embedded .res File ... |               |   | 8 Note      |
| PLAT941_ALERT_3_G |   | Average HKL Measurement Multiplicity .....       |               |   | 3.0 Low     |
| PLAT978_ALERT_2_G |   | Number C-C Bonds with Positive Residual Density. |               |   | 3 Info      |
| PLAT992_ALERT_5_G |   | Repd & Actual _reflns_number_gt Values Differ by |               |   | 1 Check     |

## 2.5 Complex 5

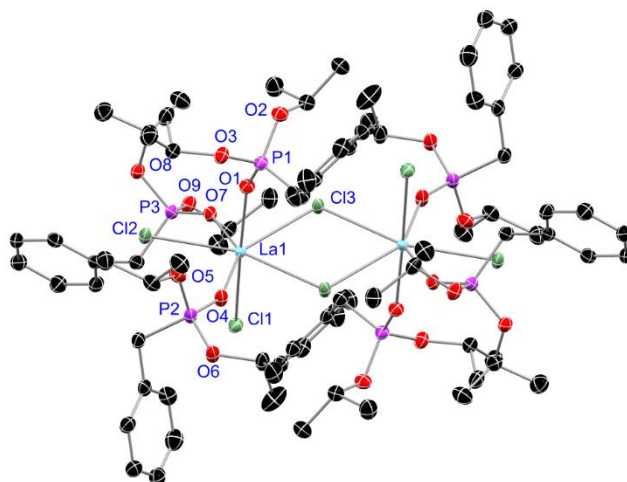

Figure 44: Asymmetric unit of **5**.

**5** crystallizes in the space group  $P\bar{1}$ . The asymmetric unit contains half of the dimer. The other half is generated by the inversion center.

Bond length [Å] and angles [°] of **5**.

|             |          |             |          |
|-------------|----------|-------------|----------|
| C(1)–C(2)   | 1.511(4) | C(18)–C(19) | 1.391(5) |
| C(1)–P(1)   | 1.790(3) | C(19)–C(20) | 1.386(4) |
| C(2)–C(3)   | 1.389(4) | C(21)–C(22) | 1.520(4) |
| C(2)–C(7)   | 1.384(4) | C(21)–C(23) | 1.503(4) |
| C(3)–C(4)   | 1.391(4) | C(21)–O(5)  | 1.475(3) |
| C(4)–C(5)   | 1.382(4) | C(24)–C(25) | 1.501(5) |
| C(5)–C(6)   | 1.385(4) | C(24)–C(26) | 1.505(4) |
| C(6)–C(7)   | 1.392(4) | C(24)–O(6)  | 1.479(3) |
| C(8)–C(9)   | 1.511(4) | C(27)–C(28) | 1.518(3) |
| C(8)–C(10)  | 1.513(4) | C(27)–P(3)  | 1.792(3) |
| C(8)–O(2)   | 1.483(3) | C(28)–C(29) | 1.396(4) |
| C(11)–C(12) | 1.509(4) | C(28)–C(33) | 1.385(4) |
| C(11)–C(13) | 1.513(4) | C(29)–C(30) | 1.391(4) |
| C(11)–O(3)  | 1.481(3) | C(30)–C(31) | 1.380(4) |
| C(14)–C(15) | 1.518(4) | C(31)–C(32) | 1.383(4) |
| C(14)–P(2)  | 1.789(3) | C(32)–C(33) | 1.388(4) |
| C(15)–C(16) | 1.386(4) | C(34)–C(35) | 1.504(4) |
| C(15)–C(20) | 1.388(4) | C(34)–C(36) | 1.506(4) |
| C(16)–C(17) | 1.392(4) | C(34)–O(8)  | 1.470(3) |
| C(17)–C(18) | 1.380(5) | C(37)–C(38) | 1.510(4) |

|                   |            |                     |             |
|-------------------|------------|---------------------|-------------|
| C(37)–C(39)       | 1.514(4)   | C(18)–C(17)–C(16)   | 120.7(3)    |
| C(37)–O(9)        | 1.475(3)   | C(17)–C(18)–C(19)   | 119.2(3)    |
| Cl(1)–La(1)       | 2.7807(6)  | C(20)–C(19)–C(18)   | 120.2(3)    |
| Cl(2)–La(1)       | 2.8596(6)  | C(19)–C(20)–C(15)   | 120.6(3)    |
| Cl(3)–La(1)       | 2.9034(6)  | C(23)–C(21)–C(22)   | 113.6(2)    |
| Cl(3)–La(1)#1     | 2.9450(5)  | O(5)–C(21)–C(22)    | 108.1(2)    |
| La(1)–O(1)        | 2.4061(17) | O(5)–C(21)–C(23)    | 107.6(2)    |
| La(1)–O(4)        | 2.4374(17) | C(25)–C(24)–C(26)   | 114.1(3)    |
| La(1)–O(7)        | 2.4574(16) | O(6)–C(24)–C(25)    | 107.8(3)    |
| O(1)–P(1)         | 1.4859(18) | O(6)–C(24)–C(26)    | 106.1(2)    |
| O(2)–P(1)         | 1.5678(19) | C(28)–C(27)–P(3)    | 116.21(18)  |
| O(3)–P(1)         | 1.5621(19) | C(29)–C(28)–C(27)   | 120.8(2)    |
| O(4)–P(2)         | 1.4873(18) | C(33)–C(28)–C(27)   | 120.3(2)    |
| O(5)–P(2)         | 1.573(2)   | C(33)–C(28)–C(29)   | 118.9(2)    |
| O(6)–P(2)         | 1.5639(18) | C(30)–C(29)–C(28)   | 120.3(3)    |
| O(7)–P(3)         | 1.4860(17) | C(31)–C(30)–C(29)   | 120.1(3)    |
| O(8)–P(3)         | 1.5677(18) | C(30)–C(31)–C(32)   | 119.9(3)    |
| O(9)–P(3)         | 1.5681(19) | C(31)–C(32)–C(33)   | 120.1(3)    |
|                   |            | C(28)–C(33)–C(32)   | 120.7(3)    |
| C(2)–C(1)–P(1)    | 115.89(18) | C(35)–C(34)–C(36)   | 113.9(2)    |
| C(3)–C(2)–C(1)    | 120.1(2)   | O(8)–C(34)–C(35)    | 105.3(2)    |
| C(7)–C(2)–C(1)    | 120.8(2)   | O(8)–C(34)–C(36)    | 109.5(2)    |
| C(7)–C(2)–C(3)    | 119.0(2)   | C(38)–C(37)–C(39)   | 113.3(2)    |
| C(2)–C(3)–C(4)    | 120.3(3)   | O(9)–C(37)–C(38)    | 107.8(2)    |
| C(5)–C(4)–C(3)    | 120.5(3)   | O(9)–C(37)–C(39)    | 106.8(2)    |
| C(4)–C(5)–C(6)    | 119.4(3)   | La(1)–Cl(3)–La(1)#1 | 108.870(17) |
| C(5)–C(6)–C(7)    | 120.1(3)   | Cl(1)–La(1)–Cl(2)   | 100.441(18) |
| C(2)–C(7)–C(6)    | 120.7(3)   | Cl(1)–La(1)–Cl(3)   | 97.659(18)  |
| C(9)–C(8)–C(10)   | 113.3(2)   | Cl(1)–La(1)–Cl(3)#1 | 89.263(17)  |
| O(2)–C(8)–C(9)    | 108.7(2)   | Cl(2)–La(1)–Cl(3)#1 | 144.525(16) |
| O(2)–C(8)–C(10)   | 105.8(2)   | Cl(2)–La(1)–Cl(3)   | 139.395(16) |
| C(12)–C(11)–C(13) | 111.8(2)   | Cl(3)–La(1)–Cl(3)#1 | 71.128(17)  |
| O(3)–C(11)–C(12)  | 111.5(2)   | P(1)–O(1)–La(1)     | 153.76(11)  |
| O(3)–C(11)–C(13)  | 104.8(2)   | C(8)–O(2)–P(1)      | 122.37(16)  |
| C(15)–C(14)–P(2)  | 113.29(18) | C(11)–O(3)–P(1)     | 123.98(17)  |
| C(16)–C(15)–C(14) | 122.0(2)   | P(2)–O(4)–La(1)     | 154.78(10)  |
| C(16)–C(15)–C(20) | 119.1(3)   | C(21)–O(5)–P(2)     | 121.30(16)  |
| C(20)–C(15)–C(14) | 118.9(2)   | C(24)–O(6)–P(2)     | 122.63(16)  |
| C(15)–C(16)–C(17) | 120.2(3)   | P(3)–O(7)–La(1)     | 145.16(10)  |



Tmin,Tmax            0.373,0.679                    0.177,0.547  
Tmin'                0.202

Correction method= # Reported T Limits: Tmin=0.177 Tmax=0.547  
AbsCorr = MULTI-SCAN

---

Data completeness= 0.959                    Theta(max)= 71.350  
R(reflections)= 0.0272( 8807)            wR2(reflections)= 0.0755( 9025)  
S = 1.078                                    Npar= 508

The following ALERTS were generated. Each ALERT has the format  
**test-name\_ALERT\_alert-type\_alert-level**.  
Click on the hyperlinks for more details of the test.

---

**● Alert level C**

|                   |                                                  |       |     |        |
|-------------------|--------------------------------------------------|-------|-----|--------|
| PLAT911_ALERT_3_C | Missing FCF Refl Between Thmin & STh/L=          | 0.600 | 138 | Report |
| PLAT918_ALERT_3_C | Reflection(s) with I(obs) much Smaller I(calc)   | .     | 1   | Check  |
| PLAT978_ALERT_2_C | Number C-C Bonds with Positive Residual Density. |       | 0   | Info   |

---

**● Alert level G**

|                   |                                                  |       |       |            |
|-------------------|--------------------------------------------------|-------|-------|------------|
| PLAT154_ALERT_1_G | The s.u.'s on the Cell Angles are Equal ..(Note) |       | 0.002 | Degree     |
| PLAT232_ALERT_2_G | Hirshfeld Test Diff (M-X) Lal --Cl1              | .     | 5.3   | s.u.       |
| PLAT232_ALERT_2_G | Hirshfeld Test Diff (M-X) Lal --Cl2              | .     | 5.3   | s.u.       |
| PLAT232_ALERT_2_G | Hirshfeld Test Diff (M-X) Lal --Cl3              | .     | 5.7   | s.u.       |
| PLAT794_ALERT_5_G | Tentative Bond Valency for Lal (III)             | .     | 3.16  | Info       |
| PLAT883_ALERT_1_G | No Info/Value for _atom_sites_solution_primary   | .     |       | Please Do! |
| PLAT912_ALERT_4_G | Missing # of FCF Reflections Above STh/L=        | 0.600 | 217   | Note       |
| PLAT933_ALERT_2_G | Number of OMIT Records in Embedded .res File ... |       | 12    | Note       |

## 2.6 Complex 10

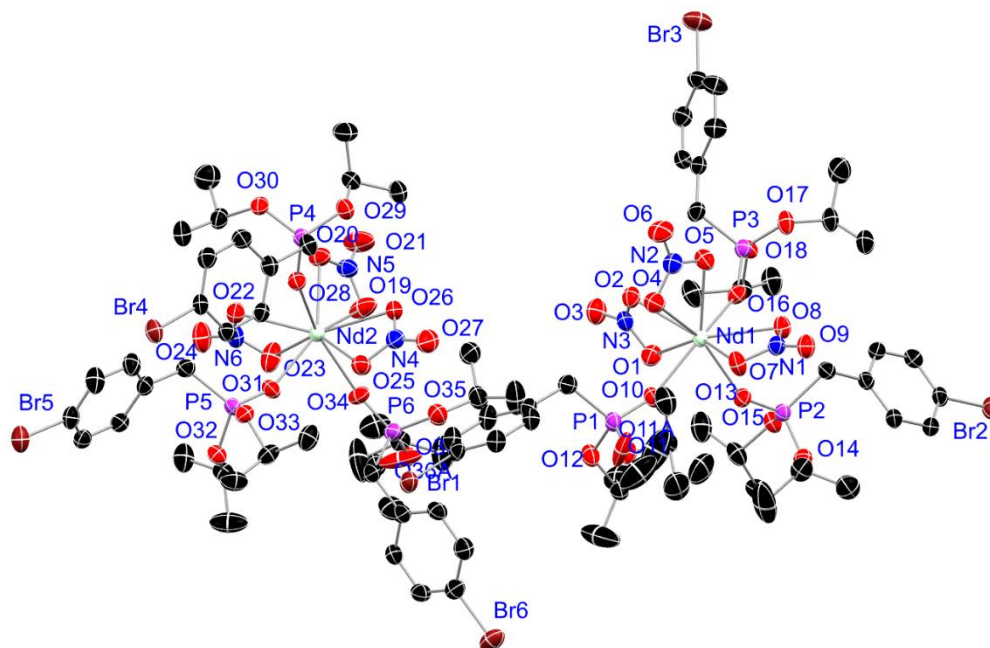

Figure 45: Asymmetric unit of **10**.

**10** crystallizes in the space group  $P\bar{1}$  and contains two molecules in the asymmetric unit. Two of the twelve *i*Pr residues are disordered about two positions also including their bridging O-atom. They are refined with distance restraints and partially with restraints for the anisotropic displacement parameters. The occupancy of the minor positions refined to 0.487(10) and 0.424(9), respectively. Just like in **L6**, halogen bonds are formed. In this case between the bromide Br2 and the outwards titled N=O (O9) oxygen atoms of a NO<sub>3</sub><sup>-</sup> anion of adjacent molecules. But in contrast to **L6**, there is less lack of electron density at the bromides. Thus, the O⋯Br distance of 3.06 Å is longer, but still shorter than the sum of the van der Waals radii of both atoms (3.35 Å), still causing a B-Alert upon cif-file check.

Bond lengths [Å] and angles [°] of **10**.

|             |          |             |          |
|-------------|----------|-------------|----------|
| C(1)–C(2)   | 1.379(5) | C(11)–O(12) | 1.479(5) |
| C(1)–C(6)   | 1.389(5) | C(14)–C(15) | 1.383(5) |
| C(2)–C(3)   | 1.387(5) | C(14)–C(19) | 1.401(5) |
| C(3)–C(4)   | 1.379(5) | C(15)–C(16) | 1.386(5) |
| C(3)–Br(1)  | 1.892(4) | C(16)–C(17) | 1.377(5) |
| C(4)–C(5)   | 1.388(5) | C(16)–Br(2) | 1.901(3) |
| C(5)–C(6)   | 1.384(5) | C(17)–C(18) | 1.387(5) |
| C(6)–C(7)   | 1.514(5) | C(18)–C(19) | 1.391(5) |
| C(7)–P(1)   | 1.787(4) | C(19)–C(20) | 1.512(5) |
| C(11)–C(12) | 1.490(7) | C(20)–P(2)  | 1.793(3) |
| C(11)–C(13) | 1.489(7) | C(21)–C(22) | 1.497(6) |

|             |          |             |          |
|-------------|----------|-------------|----------|
| C(21)–C(23) | 1.488(7) | C(55)–Br(5) | 1.900(4) |
| C(21)–O(14) | 1.476(4) | C(56)–C(57) | 1.384(6) |
| C(24)–C(25) | 1.502(6) | C(57)–C(58) | 1.384(5) |
| C(24)–C(26) | 1.496(7) | C(58)–C(59) | 1.508(5) |
| C(24)–O(15) | 1.476(4) | C(59)–P(5)  | 1.786(4) |
| C(27)–C(28) | 1.384(6) | C(60)–C(61) | 1.504(6) |
| C(27)–C(32) | 1.385(5) | C(60)–C(62) | 1.507(5) |
| C(28)–C(29) | 1.382(6) | C(60)–O(33) | 1.468(4) |
| C(29)–C(30) | 1.374(5) | C(63)–C(64) | 1.502(5) |
| C(29)–Br(3) | 1.901(4) | C(63)–C(65) | 1.501(6) |
| C(30)–C(31) | 1.387(5) | C(63)–O(32) | 1.474(4) |
| C(31)–C(32) | 1.391(5) | C(66)–C(67) | 1.387(5) |
| C(32)–C(33) | 1.506(5) | C(66)–C(71) | 1.384(5) |
| C(33)–P(3)  | 1.787(4) | C(67)–C(68) | 1.379(5) |
| C(34)–C(35) | 1.500(5) | C(68)–C(69) | 1.381(6) |
| C(34)–C(36) | 1.503(5) | C(68)–Br(6) | 1.894(4) |
| C(34)–O(18) | 1.465(4) | C(69)–C(70) | 1.386(5) |
| C(37)–C(38) | 1.505(5) | C(70)–C(71) | 1.385(5) |
| C(37)–C(39) | 1.500(6) | C(71)–C(72) | 1.505(5) |
| C(37)–O(17) | 1.478(4) | C(72)–P(6)  | 1.786(4) |
| C(40)–C(41) | 1.388(5) | C(73)–C(74) | 1.487(6) |
| C(40)–C(45) | 1.392(5) | C(73)–C(75) | 1.475(6) |
| C(41)–C(42) | 1.381(5) | C(73)–O(35) | 1.465(5) |
| C(42)–C(43) | 1.386(5) | N(1)–O(7)   | 1.271(4) |
| C(42)–Br(4) | 1.899(3) | N(1)–O(8)   | 1.268(4) |
| C(43)–C(44) | 1.383(5) | N(1)–O(9)   | 1.212(4) |
| C(44)–C(45) | 1.394(5) | N(2)–O(4)   | 1.268(4) |
| C(45)–C(46) | 1.502(5) | N(2)–O(5)   | 1.281(4) |
| C(46)–P(4)  | 1.791(3) | N(2)–O(6)   | 1.213(4) |
| C(47)–C(48) | 1.504(6) | N(3)–O(1)   | 1.273(4) |
| C(47)–C(49) | 1.502(6) | N(3)–O(2)   | 1.272(4) |
| C(47)–O(30) | 1.479(4) | N(3)–O(3)   | 1.216(4) |
| C(50)–C(51) | 1.501(5) | N(4)–O(25)  | 1.264(4) |
| C(50)–C(52) | 1.513(5) | N(4)–O(26)  | 1.277(4) |
| C(50)–O(29) | 1.475(4) | N(4)–O(27)  | 1.218(4) |
| C(53)–C(54) | 1.390(5) | N(5)–O(19)  | 1.258(4) |
| C(53)–C(58) | 1.393(5) | N(5)–O(20)  | 1.262(4) |
| C(54)–C(55) | 1.387(5) | N(5)–O(21)  | 1.223(4) |
| C(55)–C(56) | 1.367(6) | N(6)–O(22)  | 1.261(4) |

|             |           |                   |           |
|-------------|-----------|-------------------|-----------|
| N(6)–O(23)  | 1.266(4)  | C(8)–C(9)         | 1.541(12) |
| N(6)–O(24)  | 1.218(4)  | C(8)–C(10)        | 1.487(12) |
| Nd(1)–O(1)  | 2.577(2)  | O(11A)–C(8A)      | 1.383(13) |
| Nd(1)–O(2)  | 2.521(2)  | C(8A)–C(9A)       | 1.490(17) |
| Nd(1)–O(4)  | 2.566(2)  | C(8A)–C(10A)      | 1.496(16) |
| Nd(1)–O(5)  | 2.490(2)  | P(6)–O(36)        | 1.559(6)  |
| Nd(1)–O(7)  | 2.511(2)  | P(6)–O(36A)       | 1.529(10) |
| Nd(1)–O(8)  | 2.556(2)  | O(36)–C(76)       | 1.418(9)  |
| Nd(1)–O(10) | 2.373(2)  | C(76)–C(77)       | 1.487(9)  |
| Nd(1)–O(13) | 2.384(2)  | C(76)–C(78)       | 1.469(11) |
| Nd(1)–O(16) | 2.424(2)  | O(36A)–C(76A)     | 1.383(14) |
| Nd(2)–O(19) | 2.548(3)  | C(76A)–C(77A)     | 1.473(14) |
| Nd(2)–O(20) | 2.536(3)  | C(76A)–C(78A)     | 1.485(12) |
| Nd(2)–O(22) | 2.554(2)  |                   |           |
| Nd(2)–O(23) | 2.516(3)  | C(2)–C(1)–C(6)    | 121.3(3)  |
| Nd(2)–O(25) | 2.542(2)  | C(1)–C(2)–C(3)    | 118.9(3)  |
| Nd(2)–O(26) | 2.536(2)  | C(2)–C(3)–Br(1)   | 119.0(3)  |
| Nd(2)–O(28) | 2.396(2)  | C(4)–C(3)–C(2)    | 121.1(3)  |
| Nd(2)–O(31) | 2.381(2)  | C(4)–C(3)–Br(1)   | 119.9(3)  |
| Nd(2)–O(34) | 2.375(2)  | C(3)–C(4)–C(5)    | 119.0(3)  |
| O(10)–P(1)  | 1.477(2)  | C(6)–C(5)–C(4)    | 121.0(3)  |
| O(12)–P(1)  | 1.569(3)  | C(1)–C(6)–C(7)    | 120.3(3)  |
| O(13)–P(2)  | 1.487(2)  | C(5)–C(6)–C(1)    | 118.6(3)  |
| O(14)–P(2)  | 1.565(3)  | C(5)–C(6)–C(7)    | 121.1(3)  |
| O(15)–P(2)  | 1.558(2)  | C(6)–C(7)–P(1)    | 114.5(3)  |
| O(16)–P(3)  | 1.485(3)  | C(13)–C(11)–C(12) | 113.9(5)  |
| O(17)–P(3)  | 1.558(2)  | O(12)–C(11)–C(12) | 106.7(4)  |
| O(18)–P(3)  | 1.570(2)  | O(12)–C(11)–C(13) | 108.7(4)  |
| O(28)–P(4)  | 1.487(2)  | C(15)–C(14)–C(19) | 121.5(3)  |
| O(29)–P(4)  | 1.561(2)  | C(14)–C(15)–C(16) | 118.6(3)  |
| O(30)–P(4)  | 1.562(3)  | C(15)–C(16)–Br(2) | 119.4(3)  |
| O(31)–P(5)  | 1.483(2)  | C(17)–C(16)–C(15) | 121.3(3)  |
| O(32)–P(5)  | 1.562(2)  | C(17)–C(16)–Br(2) | 119.2(3)  |
| O(33)–P(5)  | 1.563(2)  | C(16)–C(17)–C(18) | 119.5(3)  |
| O(34)–P(6)  | 1.476(3)  | C(17)–C(18)–C(19) | 120.9(3)  |
| O(35)–P(6)  | 1.570(3)  | C(14)–C(19)–C(20) | 119.8(3)  |
| P(1)–O(11)  | 1.557(8)  | C(18)–C(19)–C(14) | 118.2(3)  |
| P(1)–O(11A) | 1.549(10) | C(18)–C(19)–C(20) | 121.9(3)  |
| O(11)–C(8)  | 1.458(9)  | C(19)–C(20)–P(2)  | 115.6(2)  |



|                   |          |                   |           |
|-------------------|----------|-------------------|-----------|
| C(23)–C(21)–C(22) | 113.2(4) | O(29)–C(50)–C(52) | 106.2(3)  |
| O(14)–C(21)–C(22) | 108.1(3) | C(54)–C(53)–C(58) | 121.3(3)  |
| O(14)–C(21)–C(23) | 107.6(4) | C(55)–C(54)–C(53) | 118.3(3)  |
| C(26)–C(24)–C(25) | 114.1(4) | C(54)–C(55)–Br(5) | 119.1(3)  |
| O(15)–C(24)–C(25) | 106.6(3) | C(56)–C(55)–C(54) | 121.5(4)  |
| O(15)–C(24)–C(26) | 107.6(3) | C(56)–C(55)–Br(5) | 119.4(3)  |
| C(28)–C(27)–C(32) | 120.7(4) | C(55)–C(56)–C(57) | 119.3(4)  |
| C(29)–C(28)–C(27) | 118.9(4) | C(58)–C(57)–C(56) | 121.3(4)  |
| C(28)–C(29)–Br(3) | 119.2(3) | C(53)–C(58)–C(59) | 121.2(3)  |
| C(30)–C(29)–C(28) | 122.1(4) | C(57)–C(58)–C(53) | 118.2(3)  |
| C(30)–C(29)–Br(3) | 118.8(3) | C(57)–C(58)–C(59) | 120.6(3)  |
| C(29)–C(30)–C(31) | 118.1(3) | C(58)–C(59)–P(5)  | 114.5(2)  |
| C(30)–C(31)–C(32) | 121.4(3) | C(61)–C(60)–C(62) | 114.5(3)  |
| C(27)–C(32)–C(31) | 118.7(3) | O(33)–C(60)–C(61) | 106.2(3)  |
| C(27)–C(32)–C(33) | 121.1(3) | O(33)–C(60)–C(62) | 107.0(3)  |
| C(31)–C(32)–C(33) | 120.2(3) | C(65)–C(63)–C(64) | 114.4(4)  |
| C(32)–C(33)–P(3)  | 114.8(2) | O(32)–C(63)–C(64) | 109.8(3)  |
| C(35)–C(34)–C(36) | 112.9(3) | O(32)–C(63)–C(65) | 104.9(3)  |
| O(18)–C(34)–C(35) | 108.7(3) | C(71)–C(66)–C(67) | 121.2(3)  |
| O(18)–C(34)–C(36) | 105.6(3) | C(68)–C(67)–C(66) | 118.7(3)  |
| C(39)–C(37)–C(38) | 113.5(3) | C(67)–C(68)–C(69) | 121.2(3)  |
| O(17)–C(37)–C(38) | 107.8(3) | C(67)–C(68)–Br(6) | 120.0(3)  |
| O(17)–C(37)–C(39) | 107.0(3) | C(69)–C(68)–Br(6) | 118.8(3)  |
| C(41)–C(40)–C(45) | 120.9(3) | C(68)–C(69)–C(70) | 119.3(3)  |
| C(42)–C(41)–C(40) | 118.7(3) | C(71)–C(70)–C(69) | 120.6(3)  |
| C(41)–C(42)–C(43) | 121.5(3) | C(66)–C(71)–C(70) | 119.0(3)  |
| C(41)–C(42)–Br(4) | 119.1(3) | C(66)–C(71)–C(72) | 120.8(3)  |
| C(43)–C(42)–Br(4) | 119.4(3) | C(70)–C(71)–C(72) | 120.2(3)  |
| C(44)–C(43)–C(42) | 119.2(3) | C(71)–C(72)–P(6)  | 116.0(2)  |
| C(43)–C(44)–C(45) | 120.5(3) | C(75)–C(73)–C(74) | 114.2(4)  |
| C(40)–C(45)–C(44) | 119.1(3) | O(35)–C(73)–C(74) | 106.4(3)  |
| C(40)–C(45)–C(46) | 120.0(3) | O(35)–C(73)–C(75) | 112.4(3)  |
| C(44)–C(45)–C(46) | 120.9(3) | O(7)–N(1)–Nd(1)   | 56.88(16) |
| C(45)–C(46)–P(4)  | 116.6(2) | O(8)–N(1)–Nd(1)   | 58.90(15) |
| C(49)–C(47)–C(48) | 113.6(4) | O(8)–N(1)–O(7)    | 115.5(3)  |
| O(30)–C(47)–C(48) | 106.0(3) | O(9)–N(1)–Nd(1)   | 175.3(2)  |
| O(30)–C(47)–C(49) | 108.3(3) | O(9)–N(1)–O(7)    | 122.1(3)  |
| C(51)–C(50)–C(52) | 113.7(3) | O(9)–N(1)–O(8)    | 122.3(3)  |
| O(29)–C(50)–C(51) | 108.2(3) | O(4)–N(2)–Nd(1)   | 59.60(16) |

|                  |           |                   |           |
|------------------|-----------|-------------------|-----------|
| O(4)–N(2)–O(5)   | 115.7(3)  | O(2)–Nd(1)–O(4)   | 69.75(8)  |
| O(5)–N(2)–Nd(1)  | 56.23(16) | O(2)–Nd(1)–O(8)   | 144.38(8) |
| O(6)–N(2)–Nd(1)  | 175.9(3)  | O(4)–Nd(1)–N(1)   | 86.32(8)  |
| O(6)–N(2)–O(4)   | 122.9(3)  | O(4)–Nd(1)–N(2)   | 25.24(8)  |
| O(6)–N(2)–O(5)   | 121.4(3)  | O(4)–Nd(1)–N(3)   | 91.87(8)  |
| O(1)–N(3)–Nd(1)  | 59.23(16) | O(4)–Nd(1)–O(1)   | 112.93(8) |
| O(2)–N(3)–Nd(1)  | 56.71(16) | O(5)–Nd(1)–N(1)   | 77.22(8)  |
| O(2)–N(3)–O(1)   | 115.8(3)  | O(5)–Nd(1)–N(2)   | 25.32(8)  |
| O(3)–N(3)–Nd(1)  | 174.4(2)  | O(5)–Nd(1)–N(3)   | 98.11(9)  |
| O(3)–N(3)–O(1)   | 122.6(3)  | O(5)–Nd(1)–O(1)   | 121.77(9) |
| O(3)–N(3)–O(2)   | 121.6(3)  | O(5)–Nd(1)–O(2)   | 75.21(8)  |
| O(25)–N(4)–Nd(2) | 58.35(17) | O(5)–Nd(1)–O(4)   | 50.52(8)  |
| O(25)–N(4)–O(26) | 116.5(3)  | O(5)–Nd(1)–O(7)   | 85.60(9)  |
| O(26)–N(4)–Nd(2) | 58.13(16) | O(5)–Nd(1)–O(8)   | 73.52(9)  |
| O(27)–N(4)–Nd(2) | 179.6(3)  | O(7)–Nd(1)–N(1)   | 25.08(8)  |
| O(27)–N(4)–O(25) | 122.1(4)  | O(7)–Nd(1)–N(2)   | 79.27(9)  |
| O(27)–N(4)–O(26) | 121.4(3)  | O(7)–Nd(1)–N(3)   | 157.45(8) |
| O(19)–N(5)–Nd(2) | 58.66(17) | O(7)–Nd(1)–O(1)   | 149.92(9) |
| O(19)–N(5)–O(20) | 116.7(3)  | O(7)–Nd(1)–O(2)   | 142.62(8) |
| O(20)–N(5)–Nd(2) | 58.11(17) | O(7)–Nd(1)–O(4)   | 73.26(9)  |
| O(21)–N(5)–Nd(2) | 178.6(3)  | O(7)–Nd(1)–O(8)   | 50.15(8)  |
| O(21)–N(5)–O(19) | 121.4(3)  | O(8)–Nd(1)–N(1)   | 25.14(8)  |
| O(21)–N(5)–O(20) | 121.9(3)  | O(8)–Nd(1)–N(2)   | 88.36(8)  |
| O(22)–N(6)–Nd(2) | 58.83(16) | O(8)–Nd(1)–N(3)   | 152.11(8) |
| O(22)–N(6)–O(23) | 116.0(3)  | O(8)–Nd(1)–O(1)   | 143.70(8) |
| O(23)–N(6)–Nd(2) | 57.13(17) | O(8)–Nd(1)–O(4)   | 101.94(8) |
| O(24)–N(6)–Nd(2) | 178.6(3)  | O(10)–Nd(1)–N(1)  | 100.23(8) |
| O(24)–N(6)–O(22) | 122.4(3)  | O(10)–Nd(1)–N(2)  | 100.25(9) |
| O(24)–N(6)–O(23) | 121.6(3)  | O(10)–Nd(1)–N(3)  | 83.69(8)  |
| N(1)–Nd(1)–N(3)  | 175.09(8) | O(10)–Nd(1)–O(1)  | 77.27(9)  |
| N(2)–Nd(1)–N(1)  | 81.86(8)  | O(10)–Nd(1)–O(2)  | 89.13(9)  |
| N(2)–Nd(1)–N(3)  | 94.57(8)  | O(10)–Nd(1)–O(4)  | 75.01(8)  |
| O(1)–Nd(1)–N(1)  | 158.64(8) | O(10)–Nd(1)–O(5)  | 125.51(8) |
| O(1)–Nd(1)–N(2)  | 119.49(8) | O(10)–Nd(1)–O(7)  | 76.22(8)  |
| O(1)–Nd(1)–N(3)  | 25.12(8)  | O(10)–Nd(1)–O(8)  | 123.12(8) |
| O(2)–Nd(1)–N(1)  | 151.20(8) | O(10)–Nd(1)–O(13) | 84.41(8)  |
| O(2)–Nd(1)–N(2)  | 69.64(8)  | O(10)–Nd(1)–O(16) | 152.15(8) |
| O(2)–Nd(1)–N(3)  | 24.94(8)  | O(13)–Nd(1)–N(1)  | 80.79(8)  |
| O(2)–Nd(1)–O(1)  | 50.02(8)  | O(13)–Nd(1)–N(2)  | 162.58(8) |

|                   |            |                   |            |
|-------------------|------------|-------------------|------------|
| O(13)–Nd(1)–N(3)  | 102.65(8)  | O(23)–Nd(2)–O(25) | 142.17(10) |
| O(13)–Nd(1)–O(1)  | 77.86(8)   | O(23)–Nd(2)–O(26) | 147.32(9)  |
| O(13)–Nd(1)–O(2)  | 127.51(8)  | O(25)–Nd(2)–N(4)  | 25.03(9)   |
| O(13)–Nd(1)–O(4)  | 153.35(9)  | O(25)–Nd(2)–N(5)  | 129.15(9)  |
| O(13)–Nd(1)–O(5)  | 145.39(8)  | O(25)–Nd(2)–N(6)  | 149.08(8)  |
| O(13)–Nd(1)–O(7)  | 85.65(9)   | O(25)–Nd(2)–O(19) | 117.19(10) |
| O(13)–Nd(1)–O(8)  | 75.20(8)   | O(25)–Nd(2)–O(22) | 139.98(8)  |
| O(13)–Nd(1)–O(16) | 81.00(8)   | O(26)–Nd(2)–N(4)  | 25.32(9)   |
| O(16)–Nd(1)–N(1)  | 100.67(8)  | O(26)–Nd(2)–N(5)  | 79.27(9)   |
| O(16)–Nd(1)–N(2)  | 100.75(8)  | O(26)–Nd(2)–N(6)  | 160.55(9)  |
| O(16)–Nd(1)–N(3)  | 76.60(8)   | O(26)–Nd(2)–O(19) | 74.71(11)  |
| O(16)–Nd(1)–O(1)  | 76.55(8)   | O(26)–Nd(2)–O(20) | 84.47(9)   |
| O(16)–Nd(1)–O(2)  | 81.27(8)   | O(26)–Nd(2)–O(22) | 150.13(8)  |
| O(16)–Nd(1)–O(4)  | 124.53(8)  | O(26)–Nd(2)–O(25) | 50.35(8)   |
| O(16)–Nd(1)–O(5)  | 77.25(8)   | O(28)–Nd(2)–N(4)  | 76.51(8)   |
| O(16)–Nd(1)–O(7)  | 125.74(8)  | O(28)–Nd(2)–N(5)  | 99.86(8)   |
| O(16)–Nd(1)–O(8)  | 75.60(8)   | O(28)–Nd(2)–N(6)  | 103.85(9)  |
| N(4)–Nd(2)–N(6)   | 174.11(9)  | O(28)–Nd(2)–O(19) | 121.47(9)  |
| N(5)–Nd(2)–N(4)   | 104.39(9)  | O(28)–Nd(2)–O(20) | 77.12(8)   |
| N(5)–Nd(2)–N(6)   | 81.39(9)   | O(28)–Nd(2)–O(22) | 78.89(8)   |
| O(19)–Nd(2)–N(4)  | 96.30(11)  | O(28)–Nd(2)–O(23) | 128.81(9)  |
| O(19)–Nd(2)–N(5)  | 24.93(9)   | O(28)–Nd(2)–O(25) | 78.17(8)   |
| O(19)–Nd(2)–N(6)  | 88.52(10)  | O(28)–Nd(2)–O(26) | 77.61(8)   |
| O(19)–Nd(2)–O(22) | 102.73(10) | O(31)–Nd(2)–N(4)  | 96.52(9)   |
| O(20)–Nd(2)–N(4)  | 108.61(9)  | O(31)–Nd(2)–N(5)  | 158.78(9)  |
| O(20)–Nd(2)–N(5)  | 25.00(8)   | O(31)–Nd(2)–N(6)  | 77.64(8)   |
| O(20)–Nd(2)–N(6)  | 77.10(9)   | O(31)–Nd(2)–O(19) | 149.56(10) |
| O(20)–Nd(2)–O(19) | 49.91(8)   | O(31)–Nd(2)–O(20) | 146.77(9)  |
| O(20)–Nd(2)–O(22) | 72.49(9)   | O(31)–Nd(2)–O(22) | 75.47(9)   |
| O(20)–Nd(2)–O(25) | 132.11(8)  | O(31)–Nd(2)–O(23) | 82.19(10)  |
| O(22)–Nd(2)–N(4)  | 154.33(9)  | O(31)–Nd(2)–O(25) | 71.55(8)   |
| O(22)–Nd(2)–N(5)  | 86.89(9)   | O(31)–Nd(2)–O(26) | 121.78(9)  |
| O(22)–Nd(2)–N(6)  | 25.00(9)   | O(31)–Nd(2)–O(28) | 88.39(8)   |
| O(23)–Nd(2)–N(4)  | 154.40(9)  | O(34)–Nd(2)–N(4)  | 78.20(9)   |
| O(23)–Nd(2)–N(5)  | 77.40(10)  | O(34)–Nd(2)–N(5)  | 94.23(9)   |
| O(23)–Nd(2)–N(6)  | 25.00(9)   | O(34)–Nd(2)–N(6)  | 100.46(9)  |
| O(23)–Nd(2)–O(19) | 74.45(12)  | O(34)–Nd(2)–O(19) | 69.41(9)   |
| O(23)–Nd(2)–O(20) | 83.98(10)  | O(34)–Nd(2)–O(20) | 119.21(8)  |
| O(23)–Nd(2)–O(22) | 50.00(9)   | O(34)–Nd(2)–O(22) | 124.60(9)  |

|                   |            |                     |            |
|-------------------|------------|---------------------|------------|
| O(34)–Nd(2)–O(23) | 76.20(9)   | O(11)–P(1)–O(12)    | 103.5(4)   |
| O(34)–Nd(2)–O(25) | 75.45(9)   | O(11A)–P(1)–C(7)    | 103.3(7)   |
| O(34)–Nd(2)–O(26) | 83.06(9)   | O(11A)–P(1)–O(12)   | 106.9(6)   |
| O(34)–Nd(2)–O(28) | 153.41(8)  | C(8)–O(11)–P(1)     | 122.1(8)   |
| O(34)–Nd(2)–O(31) | 86.42(9)   | O(11)–C(8)–C(9)     | 115.9(8)   |
| N(3)–O(1)–Nd(1)   | 95.64(18)  | O(11)–C(8)–C(10)    | 103.2(8)   |
| N(3)–O(2)–Nd(1)   | 98.35(19)  | C(10)–C(8)–C(9)     | 113.4(8)   |
| N(2)–O(4)–Nd(1)   | 95.16(18)  | C(8A)–O(11A)–P(1)   | 136.1(13)  |
| N(2)–O(5)–Nd(1)   | 98.5(2)    | O(11A)–C(8A)–C(9A)  | 116.3(15)  |
| N(1)–O(7)–Nd(1)   | 98.04(19)  | O(11A)–C(8A)–C(10A) | 108.9(13)  |
| N(1)–O(8)–Nd(1)   | 95.97(18)  | C(9A)–C(8A)–C(10A)  | 114.9(13)  |
| P(1)–O(10)–Nd(1)  | 161.58(16) | O(13)–P(2)–C(20)    | 112.73(15) |
| C(11)–O(12)–P(1)  | 118.9(2)   | O(13)–P(2)–O(14)    | 111.43(14) |
| P(2)–O(13)–Nd(1)  | 148.99(15) | O(13)–P(2)–O(15)    | 114.65(14) |
| C(21)–O(14)–P(2)  | 121.9(2)   | O(14)–P(2)–C(20)    | 108.96(15) |
| C(24)–O(15)–P(2)  | 121.4(2)   | O(15)–P(2)–C(20)    | 103.40(15) |
| P(3)–O(16)–Nd(1)  | 145.06(14) | O(15)–P(2)–O(14)    | 105.07(14) |
| C(37)–O(17)–P(3)  | 126.2(2)   | O(16)–P(3)–C(33)    | 111.58(15) |
| C(34)–O(18)–P(3)  | 125.8(2)   | O(16)–P(3)–O(17)    | 114.17(15) |
| N(5)–O(19)–Nd(2)  | 96.4(2)    | O(16)–P(3)–O(18)    | 113.15(13) |
| N(5)–O(20)–Nd(2)  | 96.89(19)  | O(17)–P(3)–C(33)    | 104.24(16) |
| N(6)–O(22)–Nd(2)  | 96.2(2)    | O(17)–P(3)–O(18)    | 104.82(13) |
| N(6)–O(23)–Nd(2)  | 97.9(2)    | O(18)–P(3)–C(33)    | 108.24(16) |
| N(4)–O(25)–Nd(2)  | 96.6(2)    | O(28)–P(4)–C(46)    | 114.08(16) |
| N(4)–O(26)–Nd(2)  | 96.55(19)  | O(28)–P(4)–O(29)    | 115.55(14) |
| P(4)–O(28)–Nd(2)  | 153.70(15) | O(28)–P(4)–O(30)    | 111.56(13) |
| C(50)–O(29)–P(4)  | 124.7(2)   | O(29)–P(4)–C(46)    | 99.71(15)  |
| C(47)–O(30)–P(4)  | 124.1(2)   | O(29)–P(4)–O(30)    | 106.75(14) |
| P(5)–O(31)–Nd(2)  | 156.74(16) | O(30)–P(4)–C(46)    | 108.28(16) |
| C(63)–O(32)–P(5)  | 124.1(2)   | O(31)–P(5)–C(59)    | 112.61(16) |
| C(60)–O(33)–P(5)  | 123.2(2)   | O(31)–P(5)–O(32)    | 111.60(14) |
| P(6)–O(34)–Nd(2)  | 148.02(16) | O(31)–P(5)–O(33)    | 115.00(14) |
| C(73)–O(35)–P(6)  | 125.9(3)   | O(32)–P(5)–C(59)    | 110.02(15) |
| O(10)–P(1)–C(7)   | 112.74(17) | O(32)–P(5)–O(33)    | 103.79(13) |
| O(10)–P(1)–O(12)  | 112.72(15) | O(33)–P(5)–C(59)    | 103.17(15) |
| O(10)–P(1)–O(11)  | 110.7(5)   | O(34)–P(6)–C(72)    | 110.86(16) |
| O(10)–P(1)–O(11A) | 116.5(6)   | O(34)–P(6)–O(35)    | 113.24(16) |
| O(12)–P(1)–C(7)   | 103.41(16) | O(34)–P(6)–O(36)    | 114.3(3)   |
| O(11)–P(1)–C(7)   | 113.2(5)   | O(34)–P(6)–O(36A)   | 110.7(6)   |

|                   |            |                      |           |
|-------------------|------------|----------------------|-----------|
| O(35)–P(6)–C(72)  | 103.25(16) | O(36)–C(76)–C(78)    | 115.1(9)  |
| O(36)–P(6)–C(72)  | 109.5(4)   | C(78)–C(76)–C(77)    | 112.5(7)  |
| O(36)–P(6)–O(35)  | 105.0(2)   | C(76A)–O(36A)–P(6)   | 134.2(12) |
| O(36A)–P(6)–C(72) | 104.1(7)   | O(36A)–C(76A)–C(77A) | 116.9(12) |
| O(36A)–P(6)–O(35) | 114.0(7)   | O(36A)–C(76A)–C(78A) | 107.5(10) |
| C(76)–O(36)–P(6)  | 125.7(7)   | C(77A)–C(76A)–C(78A) | 113.4(9)  |
| O(36)–C(76)–C(77) | 103.8(6)   |                      |           |

## checkCIF/PLATON report

Structure factors have been supplied for datablock(s) sv0709

THIS REPORT IS FOR GUIDANCE ONLY. IF USED AS PART OF A REVIEW PROCEDURE FOR PUBLICATION, IT SHOULD NOT REPLACE THE EXPERTISE OF AN EXPERIENCED CRYSTALLOGRAPHIC REFEREE.

No syntax errors found. CIF dictionary Interpreting this report

### Datablock: sv0709

Bond precision: C-C = 0.0062 Å Wavelength=1.54186

|                |                          |                |                                 |
|----------------|--------------------------|----------------|---------------------------------|
| Cell:          | a=16.4380(3)             | b=20.2226(3)   | c=20.3926(3)                    |
|                | alpha=61.933(1)          | beta=70.494(1) | gamma=67.900(1)                 |
| Temperature:   | 100 K                    |                |                                 |
|                | Calculated               |                | Reported                        |
| Volume         | 5439.19(16)              |                | 5439.20(16)                     |
| Space group    | P -1                     |                | P -1                            |
| Hall group     | -P 1                     |                | -P 1                            |
| Moiety formula | C39 H60 Br3 N3 Nd O18 P3 |                | 0.5(C78 H120 Br6 N6 Nd2 O36 P6) |
| Sum formula    | C39 H60 Br3 N3 Nd O18 P3 |                | C39 H60 Br3 N3 Nd O18 P3        |
| Mr             | 1335.75                  |                | 1335.78                         |
| Dx,g cm-3      | 1.631                    |                | 1.631                           |
| Z              | 4                        |                | 4                               |
| Mu (mm-1)      | 11.279                   |                | 11.279                          |
| F000           | 2676.0                   |                | 2676.0                          |
| F000'          | 2665.90                  |                |                                 |
| h,k,lmax       | 19,24,24                 |                | 19,24,24                        |
| Nref           | 20414                    |                | 19710                           |
| Tmin,Tmax      | 0.075,0.133              |                | 0.043,0.217                     |
| Tmin'          | 0.005                    |                |                                 |

Correction method= # Reported T Limits: Tmin=0.043 Tmax=0.217 AbsCorr = MULTI-SCAN

Data completeness= 0.966

Theta(max)= 69.474

R(reflections)= 0.0341( 18960)

wR2(reflections)= 0.0902( 19710)

The following ALERTS were generated. Each ALERT has the format  
**test-name\_ALERT\_alert-type\_alert-level.**

Click on the hyperlinks for more details of the test.

### Alert level B

PLAT431\_ALERT\_2\_B Short Inter HL..A Contact Br2 ..O9 . 3.06 Ang.  
 2-x,-y,2-z = 2\_757 Check

### Alert level C

|                   |                                                 |                                     |   |                     |       |       |            |
|-------------------|-------------------------------------------------|-------------------------------------|---|---------------------|-------|-------|------------|
| PLAT220_ALERT_2_C | NonSolvent                                      | Resd 1                              | C | Ueq(max) / Ueq(min) | Range | 4.0   | Ratio      |
| PLAT220_ALERT_2_C | NonSolvent                                      | Resd 2                              | C | Ueq(max) / Ueq(min) | Range | 3.5   | Ratio      |
| PLAT220_ALERT_2_C | NonSolvent                                      | Resd 2                              | O | Ueq(max) / Ueq(min) | Range | 3.1   | Ratio      |
| PLAT222_ALERT_3_C | NonSolvent                                      | Resd 1                              | H | Uiso(max)/Uiso(min) | Range | 4.4   | Ratio      |
| PLAT222_ALERT_3_C | NonSolvent                                      | Resd 2                              | H | Uiso(max)/Uiso(min) | Range | 4.4   | Ratio      |
| PLAT241_ALERT_2_C | High 'MainMol'                                  | Ueq as Compared to Neighbors of O19 |   |                     |       |       | Check      |
| PLAT241_ALERT_2_C | High 'MainMol'                                  | Ueq as Compared to Neighbors of O23 |   |                     |       |       | Check      |
| PLAT242_ALERT_2_C | Low 'MainMol'                                   | Ueq as Compared to Neighbors of C11 |   |                     |       |       | Check      |
| PLAT242_ALERT_2_C | Low 'MainMol'                                   | Ueq as Compared to Neighbors of C21 |   |                     |       |       | Check      |
| PLAT242_ALERT_2_C | Low 'MainMol'                                   | Ueq as Compared to Neighbors of C63 |   |                     |       |       | Check      |
| PLAT431_ALERT_2_C | Short Inter HL..A Contact Br5 ..O24 . 3.10 Ang. |                                     |   |                     |       |       |            |
|                   |                                                 |                                     |   | 1-x,3-y,1-z         | =     | 2_686 | Check      |
| PLAT911_ALERT_3_C | Missing FCF Refl Between Thmin & STh/L=         |                                     |   |                     |       | 0.600 | 369 Report |

### Alert level G

|                   |                                                  |                          |      |             |   |       |              |
|-------------------|--------------------------------------------------|--------------------------|------|-------------|---|-------|--------------|
| PLAT002_ALERT_2_G | Number of Distance or Angle Restraints on AtSite |                          |      |             |   | 18    | Note         |
| PLAT003_ALERT_2_G | Number of Uiso or Uij Restrained non-H Atoms ... |                          |      |             |   | 16    | Report       |
| PLAT042_ALERT_1_G | Calc. and Reported MoietyFormula Strings Differ  |                          |      |             |   |       | Please Check |
| PLAT083_ALERT_2_G | SHELXL Second Parameter in WGHT Unusually Large  |                          |      |             |   | 7.28  | Why ?        |
| PLAT154_ALERT_1_G | The s.u.'s on the Cell Angles are Equal ..(Note) |                          |      |             |   | 0.001 | Degree       |
| PLAT175_ALERT_4_G | The CIF-Embedded .res File Contains SAME Records |                          |      |             |   | 2     | Report       |
| PLAT178_ALERT_4_G | The CIF-Embedded .res File Contains SIMU Records |                          |      |             |   | 4     | Report       |
| PLAT187_ALERT_4_G | The CIF-Embedded .res File Contains RIGU Records |                          |      |             |   | 2     | Report       |
| PLAT232_ALERT_2_G | Hirshfeld Test Diff (M-X)                        | Nd1                      | --O1 |             |   | 5.7   | s.u.         |
| PLAT301_ALERT_3_G | Main Residue Disorder .....                      | (Resd 1                  | )    |             |   | 6%    | Note         |
| PLAT301_ALERT_3_G | Main Residue Disorder .....                      | (Resd 2                  | )    |             |   | 6%    | Note         |
| PLAT395_ALERT_2_G | Deviating X-O-Y Angle From 120 for O11A          |                          |      |             |   | 136.1 | Degree       |
| PLAT395_ALERT_2_G | Deviating X-O-Y Angle From 120 for O36A          |                          |      |             |   | 134.2 | Degree       |
| PLAT432_ALERT_2_G | Short Inter X...Y Contact Br1 ..C71              |                          |      |             |   | 3.30  | Ang.         |
|                   |                                                  |                          |      | 2-x,2-y,1-z | = | 2_776 | Check        |
| PLAT720_ALERT_4_G | Number of Unusual/Non-Standard Labels .....      |                          |      |             |   | 3     | Note         |
| PLAT790_ALERT_4_G | Centre of Gravity not Within Unit Cell: Resd.    |                          |      |             |   | #     | 2 Note       |
|                   |                                                  | C39 H60 Br3 N3 Nd O18 P3 |      |             |   |       |              |
| PLAT794_ALERT_5_G | Tentative Bond Valency for Nd1                   | (II)                     | .    |             |   | 2.14  | Info         |
| PLAT794_ALERT_5_G | Tentative Bond Valency for Nd2                   | (II)                     | .    |             |   | 2.15  | Info         |
| PLAT860_ALERT_3_G | Number of Least-Squares Restraints .....         |                          |      |             |   | 106   | Note         |
| PLAT883_ALERT_1_G | No Info/Value for _atom_sites_solution_primary . |                          |      |             |   |       | Please Do!   |
| PLAT912_ALERT_4_G | Missing # of FCF Reflections Above STh/L=        | 0.600                    |      |             |   | 335   | Note         |
| PLAT941_ALERT_3_G | Average HKL Measurement Multiplicity .....       |                          |      |             |   | 3.1   | Low          |
| PLAT960_ALERT_3_G | Number of Intensities with I < - 2*sig(I) ...    |                          |      |             |   | 1     | Check        |
| PLAT978_ALERT_2_G | Number C-C Bonds with Positive Residual Density. |                          |      |             |   | 0     | Info         |
| PLAT992_ALERT_5_G | Repd & Actual _reflns_number_gt Values Differ by |                          |      |             |   | 1     | Check        |

## 2.7 Complex 13

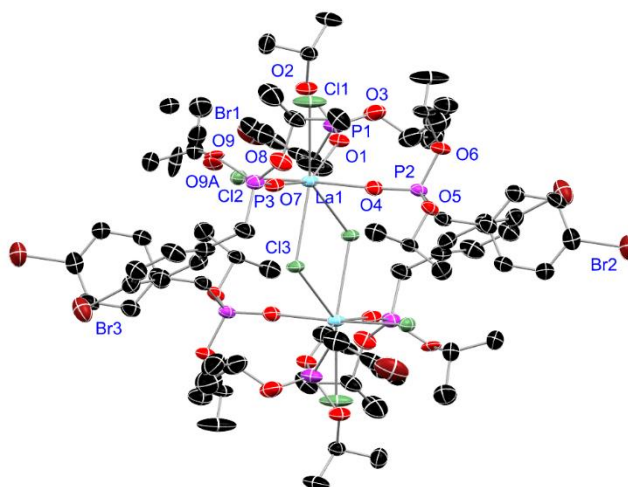

Figure 46: Asymmetric unit of **13**.

**13** crystallizes in the space group  $P2_1/c$ . The asymmetric unit contains half of the dimer. The other half is generated by a twofold rotation axis. One of the *i*Pr groups and its bridging O-atom are disordered about two positions. They are refined with distance restraints and restraints for the anisotropic displacement parameters. The occupancy of the minor position refined to 0.375(13).

Bond lengths [Å] and angles [°] of **13**.

|               |            |             |           |
|---------------|------------|-------------|-----------|
| O(9)–C(34)    | 1.460(15)  | P(1)–O(3)   | 1.534(5)  |
| O(9)–P(3)     | 1.585(12)  | P(1)–O(1)   | 1.459(5)  |
| C(34)–C(35)   | 1.501(15)  | P(2)–O(5)   | 1.545(4)  |
| C(34)–C(36)   | 1.468(16)  | P(2)–O(6)   | 1.537(4)  |
| O(9A)–C(34A)  | 1.464(16)  | P(2)–C(14)  | 1.757(6)  |
| O(9A)–P(3)    | 1.51(2)    | P(2)–O(4)   | 1.470(4)  |
| C(34A)–C(35A) | 1.51(2)    | O(2)–C(11)  | 1.447(7)  |
| C(34A)–C(36A) | 1.48(2)    | Br(2)–C(18) | 1.867(7)  |
| La(1)–Cl(1)   | 2.7583(15) | C(2)–C(3)   | 1.361(9)  |
| La(1)–Cl(2)   | 2.7425(14) | C(2)–C(7)   | 1.372(11) |
| La(1)–Cl(3)#1 | 2.8952(13) | Br(3)–C(31) | 1.860(7)  |
| La(1)–Cl(3)   | 2.9317(14) | O(3)–C(8)   | 1.437(9)  |
| La(1)–O(7)    | 2.425(4)   | P(3)–O(7)   | 1.459(4)  |
| La(1)–O(4)    | 2.366(4)   | P(3)–O(8)   | 1.531(5)  |
| La(1)–O(1)    | 2.436(4)   | P(3)–C(27)  | 1.775(6)  |
| Br(1)–C(5)    | 1.884(7)   | C(3)–C(4)   | 1.364(10) |
| C(1)–P(1)     | 1.768(6)   | C(5)–C(6)   | 1.340(11) |
| C(1)–C(2)     | 1.479(9)   | C(5)–C(4)   | 1.360(12) |
| P(1)–O(2)     | 1.539(4)   | O(5)–C(21)  | 1.460(6)  |

|                      |           |                     |            |
|----------------------|-----------|---------------------|------------|
| C(6)–C(7)            | 1.354(11) | Cl(2)–La(1)–Cl(3)   | 93.11(4)   |
| O(6)–C(24)           | 1.460(7)  | Cl(2)–La(1)–Cl(3)#1 | 91.76(4)   |
| C(8)–C(10)           | 1.492(14) | Cl(3)#1–La(1)–Cl(3) | 69.09(5)   |
| C(8)–C(9)            | 1.480(11) | O(7)–La(1)–Cl(1)    | 75.68(10)  |
| O(8)–C(37)           | 1.474(7)  | O(7)–La(1)–Cl(2)    | 94.09(10)  |
| C(11)–C(12)          | 1.487(8)  | O(7)–La(1)–Cl(3)#1  | 71.21(9)   |
| C(11)–C(13)          | 1.479(9)  | O(7)–La(1)–Cl(3)    | 139.81(9)  |
| C(14)–C(15)          | 1.494(8)  | O(7)–La(1)–O(1)     | 149.58(13) |
| C(15)–C(16)          | 1.369(9)  | O(4)–La(1)–Cl(1)    | 86.37(10)  |
| C(15)–C(20)          | 1.370(8)  | O(4)–La(1)–Cl(2)    | 174.27(11) |
| C(16)–C(17)          | 1.369(9)  | O(4)–La(1)–Cl(3)#1  | 87.02(10)  |
| C(17)–C(18)          | 1.364(9)  | O(4)–La(1)–Cl(3)    | 81.22(10)  |
| C(18)–C(19)          | 1.362(9)  | O(4)–La(1)–O(7)     | 90.82(15)  |
| C(19)–C(20)          | 1.356(9)  | O(4)–La(1)–O(1)     | 92.23(15)  |
| C(21)–C(22)          | 1.481(9)  | O(1)–La(1)–Cl(1)    | 74.33(10)  |
| C(21)–C(23)          | 1.484(8)  | O(1)–La(1)–Cl(2)    | 85.03(11)  |
| C(24)–C(25)          | 1.486(10) | O(1)–La(1)–Cl(3)#1  | 139.17(10) |
| C(24)–C(26)          | 1.465(9)  | O(1)–La(1)–Cl(3)    | 70.46(9)   |
| C(27)–C(28)          | 1.489(9)  | C(2)–C(1)–P(1)      | 118.8(4)   |
| C(28)–C(29)          | 1.369(9)  | O(2)–P(1)–C(1)      | 104.7(3)   |
| C(28)–C(33)          | 1.366(9)  | O(3)–P(1)–C(1)      | 109.6(3)   |
| C(29)–C(30)          | 1.382(9)  | O(3)–P(1)–O(2)      | 103.3(3)   |
| C(30)–C(31)          | 1.361(9)  | O(1)–P(1)–C(1)      | 111.1(3)   |
| C(31)–C(32)          | 1.369(9)  | O(1)–P(1)–O(2)      | 115.3(3)   |
| C(32)–C(33)          | 1.375(10) | O(1)–P(1)–O(3)      | 112.2(3)   |
| C(37)–C(38)          | 1.466(11) | O(5)–P(2)–C(14)     | 109.7(3)   |
| C(37)–C(39)          | 1.486(10) | O(6)–P(2)–O(5)      | 104.9(2)   |
|                      |           | O(6)–P(2)–C(14)     | 104.1(3)   |
| C(34)–O(9)–P(3)      | 122.3(10) | O(4)–P(2)–O(5)      | 111.7(2)   |
| O(9)–C(34)–C(35)     | 105.9(11) | O(4)–P(2)–O(6)      | 114.2(2)   |
| O(9)–C(34)–C(36)     | 108.6(12) | O(4)–P(2)–C(14)     | 111.7(3)   |
| C(36)–C(34)–C(35)    | 113.8(10) | C(11)–O(2)–P(1)     | 121.5(4)   |
| C(34A)–O(9A)–P(3)    | 118.3(15) | C(3)–C(2)–C(1)      | 121.8(7)   |
| O(9A)–C(34A)–C(35A)  | 106.8(16) | C(3)–C(2)–C(7)      | 118.4(7)   |
| O(9A)–C(34A)–C(36A)  | 107.5(18) | C(7)–C(2)–C(1)      | 119.6(6)   |
| C(36A)–C(34A)–C(35A) | 112.4(16) | C(8)–O(3)–P(1)      | 120.3(5)   |
| Cl(1)–La(1)–Cl(3)#1  | 146.10(5) | O(9)–P(3)–C(27)     | 111.7(5)   |
| Cl(1)–La(1)–Cl(3)    | 142.00(6) | O(9A)–P(3)–O(8)     | 103.5(9)   |
| Cl(2)–La(1)–Cl(1)    | 97.70(6)  | O(9A)–P(3)–C(27)    | 97.1(7)    |



|                     |           |                   |          |
|---------------------|-----------|-------------------|----------|
| O(7)–P(3)–O(9)      | 106.9(5)  | C(19)–C(18)–Br(2) | 120.1(5) |
| O(7)–P(3)–O(9A)     | 122.5(7)  | C(19)–C(18)–C(17) | 120.0(6) |
| O(7)–P(3)–O(8)      | 115.6(3)  | C(20)–C(19)–C(18) | 120.5(6) |
| O(7)–P(3)–C(27)     | 113.7(3)  | C(19)–C(20)–C(15) | 120.8(6) |
| O(8)–P(3)–O(9)      | 107.9(5)  | O(5)–C(21)–C(22)  | 108.1(5) |
| O(8)–P(3)–C(27)     | 101.0(3)  | O(5)–C(21)–C(23)  | 106.5(5) |
| La(1)#1–Cl(3)–La(1) | 110.91(5) | C(22)–C(21)–C(23) | 113.3(6) |
| C(2)–C(3)–C(4)      | 121.7(7)  | O(6)–C(24)–C(25)  | 106.3(6) |
| C(6)–C(5)–Br(1)     | 119.6(7)  | O(6)–C(24)–C(26)  | 108.4(5) |
| C(6)–C(5)–C(4)      | 121.6(7)  | C(26)–C(24)–C(25) | 113.5(6) |
| C(4)–C(5)–Br(1)     | 118.8(6)  | C(28)–C(27)–P(3)  | 114.2(5) |
| C(21)–O(5)–P(2)     | 120.0(3)  | C(29)–C(28)–C(27) | 120.8(6) |
| C(5)–C(6)–C(7)      | 120.1(8)  | C(33)–C(28)–C(27) | 120.2(6) |
| C(24)–O(6)–P(2)     | 122.6(4)  | C(33)–C(28)–C(29) | 119.0(6) |
| C(6)–C(7)–C(2)      | 120.3(7)  | C(28)–C(29)–C(30) | 120.2(6) |
| P(3)–O(7)–La(1)     | 172.9(3)  | C(31)–C(30)–C(29) | 120.2(6) |
| O(3)–C(8)–C(10)     | 109.6(7)  | C(30)–C(31)–Br(3) | 119.4(5) |
| O(3)–C(8)–C(9)      | 107.1(7)  | C(30)–C(31)–C(32) | 120.0(6) |
| C(9)–C(8)–C(10)     | 111.9(8)  | C(32)–C(31)–Br(3) | 120.6(5) |
| C(37)–O(8)–P(3)     | 122.3(4)  | C(31)–C(32)–C(33) | 119.4(6) |
| O(2)–C(11)–C(12)    | 108.3(5)  | C(28)–C(33)–C(32) | 121.2(6) |
| O(2)–C(11)–C(13)    | 107.6(5)  | O(8)–C(37)–C(39)  | 107.2(6) |
| C(13)–C(11)–C(12)   | 113.6(6)  | C(38)–C(37)–O(8)  | 106.2(6) |
| C(15)–C(14)–P(2)    | 116.6(4)  | C(38)–C(37)–C(39) | 113.4(6) |
| C(16)–C(15)–C(14)   | 120.4(5)  | C(5)–C(4)–C(3)    | 118.0(7) |
| C(16)–C(15)–C(20)   | 118.1(6)  | P(2)–O(4)–La(1)   | 160.2(3) |
| C(20)–C(15)–C(14)   | 121.4(6)  | P(1)–O(1)–La(1)   | 145.1(3) |
| C(17)–C(16)–C(15)   | 121.6(6)  |                   |          |
| C(18)–C(17)–C(16)   | 119.0(6)  |                   |          |
| C(17)–C(18)–Br(2)   | 119.9(5)  |                   |          |

## **checkCIF/PLATON report**

---

Structure factors have been supplied for datablock(s) i2939

THIS REPORT IS FOR GUIDANCE ONLY. IF USED AS PART OF A REVIEW PROCEDURE FOR PUBLICATION, IT SHOULD NOT REPLACE THE EXPERTISE OF AN EXPERIENCED CRYSTALLOGRAPHIC REFEREE.

No syntax errors found.      CIF dictionary      Interpreting this report

## Datablock: i2939

---

Bond precision: C-C = 0.0106 Å                      Wavelength=0.71073

Cell:                      a=14.0316(6)              b=28.3123(14)              c=14.2123(6)  
                            alpha=90                      beta=116.555(3)              gamma=90

Temperature:              100 K

|                        | Calculated               | Reported                 |
|------------------------|--------------------------|--------------------------|
| Volume                 | 5050.5(4)                | 5050.4(4)                |
| Space group            | P 21/c                   | P 1 21/c 1               |
| Hall group             | -P 2ybc                  | -P 2ybc                  |
| Moiety formula         | C78 H120 Br6 Cl6 La2 O18 | C78 H120 Br6 Cl6 La2 O18 |
|                        | P6                       | P6                       |
| Sum formula            | C78 H120 Br6 Cl6 La2 O18 | C78 H120 Br6 Cl6 La2 O18 |
|                        | P6                       | P6                       |
| Mr                     | 2501.49                  | 2501.53                  |
| Dx, g cm <sup>-3</sup> | 1.645                    | 1.645                    |
| Z                      | 2                        | 2                        |
| Mu (mm <sup>-1</sup> ) | 3.520                    | 3.520                    |
| F000                   | 2496.0                   | 2496.0                   |
| F000'                  | 2495.34                  |                          |
| h, k, lmax             | 17, 35, 18               | 17, 35, 18               |
| Nref                   | 10812                    | 10707                    |
| Tmin, Tmax             | 0.520, 0.869             | 0.251, 0.748             |
| Tmin'                  | 0.321                    |                          |

Correction method= # Reported T Limits: Tmin=0.251 Tmax=0.748  
AbsCorr = MULTI-SCAN

Data completeness= 0.990                      Theta(max)= 26.823

R(reflections)= 0.0531( 8482)                      wR2(reflections)= 0.1346( 10707)

S = 1.110                      Npar= 574

The following ALERTS were generated. Each ALERT has the format

**test-name\_ALERT\_alert-type\_alert-level.**

Click on the hyperlinks for more details of the test.

---

### 🟡 Alert level C

|                                                                   |                             |              |
|-------------------------------------------------------------------|-----------------------------|--------------|
| PLAT213_ALERT_2_C Atom O9A                                        | has ADP max/min Ratio ..... | 4.0 oblate   |
| PLAT213_ALERT_2_C Atom C34A                                       | has ADP max/min Ratio ..... | 3.1 prolat   |
| PLAT334_ALERT_2_C Small Aver. Benzene C-C Dist C2                 | -C7                         | 1.36 Ang.    |
| PLAT334_ALERT_2_C Small Aver. Benzene C-C Dist C15                | -C20                        | 1.37 Ang.    |
| PLAT334_ALERT_2_C Small Aver. Benzene C-C Dist C28                | -C33                        | 1.37 Ang.    |
| PLAT342_ALERT_3_C Low Bond Precision on C-C Bonds .....           |                             | 0.01065 Ang. |
| PLAT434_ALERT_2_C Short Inter HL..HL Contact Br1                  | ..Br2                       | 3.31 Ang.    |
|                                                                   | 1+x,3/2-y,-1/2+z =          | 4_675 Check  |
| PLAT906_ALERT_3_C Large K Value in the Analysis of Variance ..... |                             | 4.176 Check  |
| PLAT911_ALERT_3_C Missing FCF Refl Between Thmin & STh/L=         | 0.600                       | 10 Report    |

PLAT977\_ALERT\_2\_C Check Negative Difference Density on H34A -0.36 eA-3  
 PLAT978\_ALERT\_2\_C Number C-C Bonds with Positive Residual Density. 0 Info

---

● **Alert level G**

PLAT002\_ALERT\_2\_G Number of Distance or Angle Restraints on AtSite 8 Note  
 PLAT003\_ALERT\_2\_G Number of Uiso or Uij Restrained non-H Atoms ... 7 Report  
 PLAT083\_ALERT\_2\_G SHELXL Second Parameter in WGHT Unusually Large 32.98 Why?  
 PLAT175\_ALERT\_4\_G The CIF-Embedded .res File Contains SAME Records 1 Report  
 PLAT178\_ALERT\_4\_G The CIF-Embedded .res File Contains SIMU Records 1 Report  
 PLAT187\_ALERT\_4\_G The CIF-Embedded .res File Contains RIGU Records 1 Report  
 PLAT301\_ALERT\_3\_G Main Residue Disorder .....(Resd 1 ) 7% Note  
 PLAT413\_ALERT\_2\_G Short Inter XH3 .. XHn H33 ..H36D . 2.10 Ang.  
                                                   x,1/2-y,1/2+z = 4\_566 Check  
 PLAT432\_ALERT\_2\_G Short Inter X...Y Contact C9 ..C35 3.09 Ang.  
                                                   1-x,1/2+y,3/2-z = 2\_656 Check  
 PLAT794\_ALERT\_5\_G Tentative Bond Valency for Lal (III) . 3.47 Info  
 PLAT860\_ALERT\_3\_G Number of Least-Squares Restraints ..... 105 Note  
 PLAT883\_ALERT\_1\_G No Info/Value for \_atom\_sites\_solution\_primary . Please Do!  
 PLAT912\_ALERT\_4\_G Missing # of FCF Reflections Above STh/L= 0.600 96 Note  
 PLAT933\_ALERT\_2\_G Number of OMIT Records in Embedded .res File ... 12 Note

## 2.8 Complex 14

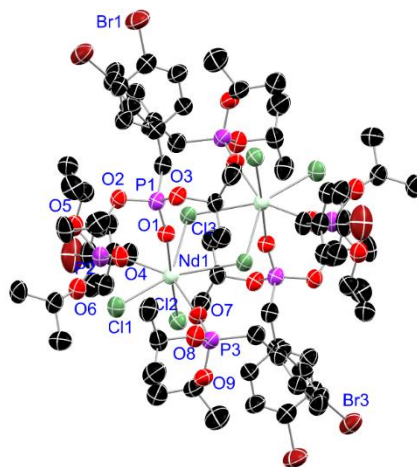

Figure 47: Asymmetric unit of **14**.

**14** crystallizes in the space group  $P2_1/c$ . The asymmetric unit contains half of the dimer. The other half is generated by a twofold rotation axis. The B-Alert on low bond precision is due to bad crystal quality - no hints for twinning are found.

Bond lengths [Å] and angles [°] of **14**.

|             |           |             |           |
|-------------|-----------|-------------|-----------|
| C(1)–C(2)   | 1.521(17) | C(17)–C(18) | 1.36(2)   |
| C(1)–P(1)   | 1.766(13) | C(18)–C(19) | 1.36(2)   |
| C(2)–C(3)   | 1.40(2)   | C(18)–Br(2) | 1.917(15) |
| C(2)–C(7)   | 1.386(18) | C(19)–C(20) | 1.36(2)   |
| C(3)–C(4)   | 1.38(2)   | C(21)–C(22) | 1.47(2)   |
| C(4)–C(5)   | 1.33(2)   | C(21)–C(23) | 1.52(2)   |
| C(5)–C(6)   | 1.37(2)   | C(21)–O(5)  | 1.445(19) |
| C(5)–Br(1)  | 1.903(15) | C(24)–C(25) | 1.488(19) |
| C(6)–C(7)   | 1.39(2)   | C(24)–C(26) | 1.49(2)   |
| C(8)–C(9)   | 1.479(19) | C(24)–O(6)  | 1.500(14) |
| C(8)–C(10)  | 1.49(2)   | C(27)–C(28) | 1.504(19) |
| C(8)–O(3)   | 1.477(14) | C(27)–P(3)  | 1.804(14) |
| C(11)–C(12) | 1.48(2)   | C(28)–C(29) | 1.403(18) |
| C(11)–C(13) | 1.492(19) | C(28)–C(33) | 1.396(19) |
| C(11)–O(2)  | 1.496(16) | C(29)–C(30) | 1.37(2)   |
| C(14)–C(15) | 1.508(18) | C(30)–C(31) | 1.38(2)   |
| C(14)–P(2)  | 1.797(13) | C(31)–C(32) | 1.372(19) |
| C(15)–C(16) | 1.36(2)   | C(31)–Br(3) | 1.932(14) |
| C(15)–C(20) | 1.39(2)   | C(32)–C(33) | 1.41(2)   |
| C(16)–C(17) | 1.40(2)   | C(34)–C(35) | 1.51(2)   |

|                   |           |                     |           |
|-------------------|-----------|---------------------|-----------|
| C(34)–C(36)       | 1.49(2)   | C(15)–C(14)–P(2)    | 116.8(10) |
| C(34)–O(8)        | 1.470(17) | C(16)–C(15)–C(14)   | 120.8(15) |
| C(37)–C(38)       | 1.44(2)   | C(16)–C(15)–C(20)   | 119.5(13) |
| C(37)–C(39)       | 1.51(2)   | C(20)–C(15)–C(14)   | 119.5(13) |
| C(37)–O(9)        | 1.52(2)   | C(15)–C(16)–C(17)   | 120.7(15) |
| Cl(1)–Nd(1)       | 2.747(3)  | C(17)–C(18)–Br(2)   | 118.1(13) |
| Cl(2)–Nd(1)       | 2.703(3)  | C(19)–C(18)–C(17)   | 123.0(15) |
| Cl(3)–Nd(1)       | 2.892(3)  | C(19)–C(18)–Br(2)   | 118.9(15) |
| Cl(3)–Nd(1)#1     | 2.927(3)  | C(20)–C(19)–C(18)   | 119.1(18) |
| Nd(1)–O(1)        | 2.333(7)  | C(19)–C(20)–C(15)   | 120.4(15) |
| Nd(1)–O(4)        | 2.398(9)  | C(22)–C(21)–C(23)   | 113.4(15) |
| Nd(1)–O(7)        | 2.403(8)  | O(5)–C(21)–C(22)    | 111.4(14) |
| O(1)–P(1)         | 1.485(8)  | O(5)–C(21)–C(23)    | 105.8(12) |
| O(2)–P(1)         | 1.556(8)  | C(25)–C(24)–C(26)   | 115.6(14) |
| O(3)–P(1)         | 1.557(9)  | C(25)–C(24)–O(6)    | 107.9(10) |
| O(4)–P(2)         | 1.479(9)  | C(26)–C(24)–O(6)    | 106.6(10) |
| O(5)–P(2)         | 1.571(10) | C(28)–C(27)–P(3)    | 113.6(10) |
| O(6)–P(2)         | 1.557(11) | C(29)–C(28)–C(27)   | 121.2(12) |
| O(7)–P(3)         | 1.476(8)  | C(33)–C(28)–C(27)   | 122.3(11) |
| O(8)–P(3)         | 1.568(9)  | C(33)–C(28)–C(29)   | 116.6(13) |
| O(9)–P(3)         | 1.542(10) | C(30)–C(29)–C(28)   | 122.8(13) |
|                   |           | C(29)–C(30)–C(31)   | 117.3(13) |
| C(2)–C(1)–P(1)    | 116.8(8)  | C(30)–C(31)–Br(3)   | 119.4(11) |
| C(3)–C(2)–C(1)    | 119.7(11) | C(32)–C(31)–C(30)   | 124.7(14) |
| C(7)–C(2)–C(1)    | 122.3(13) | C(32)–C(31)–Br(3)   | 115.9(11) |
| C(7)–C(2)–C(3)    | 118.0(13) | C(31)–C(32)–C(33)   | 115.9(13) |
| C(4)–C(3)–C(2)    | 120.3(14) | C(28)–C(33)–C(32)   | 122.7(12) |
| C(5)–C(4)–C(3)    | 121.3(16) | C(36)–C(34)–C(35)   | 111.8(14) |
| C(4)–C(5)–C(6)    | 120.2(15) | O(8)–C(34)–C(35)    | 105.4(12) |
| C(4)–C(5)–Br(1)   | 122.3(13) | O(8)–C(34)–C(36)    | 106.8(12) |
| C(6)–C(5)–Br(1)   | 117.4(11) | C(38)–C(37)–C(39)   | 115.8(16) |
| C(5)–C(6)–C(7)    | 120.2(13) | C(38)–C(37)–O(9)    | 109.7(15) |
| C(2)–C(7)–C(6)    | 120.0(14) | C(39)–C(37)–O(9)    | 105.9(14) |
| C(9)–C(8)–C(10)   | 113.7(13) | Nd(1)–Cl(3)–Nd(1)#1 | 111.13(9) |
| O(3)–C(8)–C(9)    | 108.6(10) | Cl(1)–Nd(1)–Cl(3)   | 146.34(9) |
| O(3)–C(8)–C(10)   | 107.7(10) | Cl(1)–Nd(1)–Cl(3)#1 | 141.51(9) |
| C(12)–C(11)–C(13) | 116.1(13) | Cl(2)–Nd(1)–Cl(1)   | 98.09(10) |
| C(12)–C(11)–O(2)  | 106.8(11) | Cl(2)–Nd(1)–Cl(3)   | 91.58(9)  |
| C(13)–C(11)–O(2)  | 108.0(12) | Cl(2)–Nd(1)–Cl(3)#1 | 94.10(9)  |

|                     |          |                 |          |
|---------------------|----------|-----------------|----------|
| Cl(3)–Nd(1)–Cl(3)#1 | 68.87(9) | P(3)–O(7)–Nd(1) | 173.5(6) |
| O(1)–Nd(1)–Cl(1)    | 85.4(2)  | C(34)–O(8)–P(3) | 122.3(9) |
| O(1)–Nd(1)–Cl(2)    | 175.9(2) | C(37)–O(9)–P(3) | 122.4(9) |
| O(1)–Nd(1)–Cl(3)#1  | 81.8(2)  | O(1)–P(1)–C(1)  | 111.0(5) |
| O(1)–Nd(1)–Cl(3)    | 86.7(2)  | O(1)–P(1)–O(2)  | 114.4(5) |
| O(1)–Nd(1)–O(4)     | 93.6(3)  | O(1)–P(1)–O(3)  | 112.0(5) |
| O(1)–Nd(1)–O(7)     | 91.4(3)  | O(2)–P(1)–C(1)  | 104.4(5) |
| O(4)–Nd(1)–Cl(1)    | 74.0(2)  | O(2)–P(1)–O(3)  | 104.8(5) |
| O(4)–Nd(1)–Cl(2)    | 85.3(2)  | O(3)–P(1)–C(1)  | 109.7(6) |
| O(4)–Nd(1)–Cl(3)    | 139.2(2) | O(4)–P(2)–C(14) | 110.8(6) |
| O(4)–Nd(1)–Cl(3)#1  | 70.8(2)  | O(4)–P(2)–O(5)  | 111.4(6) |
| O(4)–Nd(1)–O(7)     | 149.1(3) | O(4)–P(2)–O(6)  | 115.8(5) |
| O(7)–Nd(1)–Cl(1)    | 76.1(2)  | O(5)–P(2)–C(14) | 110.2(6) |
| O(7)–Nd(1)–Cl(2)    | 91.5(2)  | O(6)–P(2)–C(14) | 104.8(7) |
| O(7)–Nd(1)–Cl(3)#1  | 140.0(2) | O(6)–P(2)–O(5)  | 103.4(5) |
| O(7)–Nd(1)–Cl(3)    | 71.4(2)  | O(7)–P(3)–C(27) | 112.4(6) |
| P(1)–O(1)–Nd(1)     | 160.6(5) | O(7)–P(3)–O(8)  | 116.7(5) |
| C(11)–O(2)–P(1)     | 123.7(8) | O(7)–P(3)–O(9)  | 111.8(6) |
| C(8)–O(3)–P(1)      | 120.2(7) | O(8)–P(3)–C(27) | 100.9(6) |
| P(2)–O(4)–Nd(1)     | 146.6(6) | O(9)–P(3)–C(27) | 108.8(6) |
| C(21)–O(5)–P(2)     | 120.4(9) | O(9)–P(3)–O(8)  | 105.3(6) |
| C(24)–O(6)–P(2)     | 121.1(9) |                 |          |

## ***checkCIF/PLATON report***

*Structure factors have been supplied for datablock(s) sv0766*

***THIS REPORT IS FOR GUIDANCE ONLY. IF USED AS PART OF A REVIEW PROCEDURE FOR PUBLICATION, IT SHOULD NOT REPLACE THE EXPERTISE OF AN EXPERIENCED CRYSTALLOGRAPHIC REFEREE.***

*No syntax errors found.      CIF dictionary      Interpreting this report*

### ***Datablock: sv0766***

*Bond precision:    C–C = 0.0223 Å*

*Wavelength=1.54186*

*Cell:                    a=14.0648 (5)*

*b=29.1214 (12)*

*c=14.2850 (5)*

*alpha=90*

*beta=116.184 (2)*

*gamma=90*

*Temperature:        100 K*

*Calculated*

*Reported*

*Volume                5250.5 (4)*

*5250.5 (3)*

|                                                               |                          |                          |
|---------------------------------------------------------------|--------------------------|--------------------------|
| Space group                                                   | P 21/c                   | P 1 21/c 1               |
| Hall group                                                    | -P 2ybc                  | -P 2ybc                  |
| Moiety formula                                                | C78 H120 Br6 Cl6 Nd2 O18 | C78 H120 Br6 Cl6 Nd2 O18 |
|                                                               | P6                       | P6                       |
| Sum formula                                                   | C78 H120 Br6 Cl6 Nd2 O18 | C78 H120 Br6 Cl6 Nd2 O18 |
|                                                               | P6                       | P6                       |
| Mr                                                            | 2512.15                  | 2512.19                  |
| Dx,g cm-3                                                     | 1.589                    | 1.589                    |
| Z                                                             | 2                        | 2                        |
| Mu (mm-1)                                                     | 12.863                   | 12.863                   |
| F000                                                          | 2508.0                   | 2508.0                   |
| F000'                                                         | 2500.48                  |                          |
| h,k,lmax                                                      | 17,35,17                 | 16,34,17                 |
| Nref                                                          | 9853                     | 9520                     |
| Tmin,Tmax                                                     | 0.127,0.314              | 0.040,0.345              |
| Tmin'                                                         | 0.045                    |                          |
| Correction method= # Reported T Limits: Tmin=0.040 Tmax=0.345 |                          |                          |
| AbsCorr = MULTI-SCAN                                          |                          |                          |

---

Data completeness= 0.966                      Theta(max)= 69.496

R(reflections)= 0.0965( 7701)              wR2(reflections)= 0.2872( 9520)

S = 1.053                                      Npar= 535

The following ALERTS were generated. Each ALERT has the format  
**test-name\_ALERT\_alert-type\_alert-level.**  
Click on the hyperlinks for more details of the test.

---

**Alert level B**  
PLAT342\_ALERT\_3\_B Low Bond Precision on C-C Bonds ..... 0.0223 Ang.

---

**Alert level C**

|                                                                    |             |
|--------------------------------------------------------------------|-------------|
| PLAT029_ALERT_3_C _diffrn_measured_fraction_theta_full value Low . | 0.977 Why?  |
| PLAT084_ALERT_3_C High wR2 Value (i.e. > 0.25) .....               | 0.29 Report |
| PLAT094_ALERT_2_C Ratio of Maximum / Minimum Residual Density .... | 2.09 Report |
| PLAT242_ALERT_2_C Low MainMol Ueq as Compared to Neighbors of      | C8 Check    |
| PLAT334_ALERT_2_C Small Aver. Benzene C-C Dist C15 -C20            | 1.37 Ang.   |
| PLAT434_ALERT_2_C Short Inter HL..HL Contact Br1 ..Br2             | 3.29 Ang.   |
| -1+x,3/2-y,1/2+z =                                                 | 4_476 Check |
| PLAT906_ALERT_3_C Large K Value in the Analysis of Variance .....  | 4.331 Check |
| PLAT911_ALERT_3_C Missing FCF Refl Between Thmin & STh/L= 0.600    | 214 Report  |
| PLAT971_ALERT_2_C Check Calcd Resid. Dens. 1.07A From Br1          | 2.40 eA-3   |
| PLAT971_ALERT_2_C Check Calcd Resid. Dens. 1.13A From Nd1          | 1.86 eA-3   |
| PLAT971_ALERT_2_C Check Calcd Resid. Dens. 1.10A From Nd1          | 1.83 eA-3   |
| PLAT971_ALERT_2_C Check Calcd Resid. Dens. 1.16A From Nd1          | 1.69 eA-3   |
| PLAT971_ALERT_2_C Check Calcd Resid. Dens. 1.12A From Nd1          | 1.66 eA-3   |
| PLAT973_ALERT_2_C Check Calcd Positive Resid. Density on Nd1       | 1.46 eA-3   |
| PLAT977_ALERT_2_C Check Negative Difference Density on H32         | -0.42 eA-3  |
| PLAT978_ALERT_2_C Number C-C Bonds with Positive Residual Density. | 0 Info      |

---

**Alert level G**

|                                                                   |             |
|-------------------------------------------------------------------|-------------|
| PLAT072_ALERT_2_G SHELXL First Parameter in WGHT Unusually Large  | 0.15 Report |
| PLAT083_ALERT_2_G SHELXL Second Parameter in WGHT Unusually Large | 66.81 Why ? |

|                          |                                                       |                   |            |               |              |
|--------------------------|-------------------------------------------------------|-------------------|------------|---------------|--------------|
| <i>PLAT794_ALERT_5_G</i> | <i>Tentative Bond Valency for Nd1</i>                 | <i>(III)</i>      | <i>.</i>   | <i>3.16</i>   | <i>Info</i>  |
| <i>PLAT883_ALERT_1_G</i> | <i>No Info/Value for _atom_sites_solution_primary</i> | <i>.</i>          | <i>.</i>   | <i>Please</i> | <i>Do !</i>  |
| <i>PLAT912_ALERT_4_G</i> | <i>Missing # of FCF Reflections Above STh/L=</i>      | <i>0.600</i>      | <i>.</i>   | <i>102</i>    | <i>Note</i>  |
| <i>PLAT933_ALERT_2_G</i> | <i>Number of OMIT Records in Embedded .res File</i>   | <i>...</i>        | <i>.</i>   | <i>14</i>     | <i>Note</i>  |
| <i>PLAT960_ALERT_3_G</i> | <i>Number of Intensities with I &lt;</i>              | <i>- 2*sig(I)</i> | <i>...</i> | <i>34</i>     | <i>Check</i> |



## 2.9 Complex 17

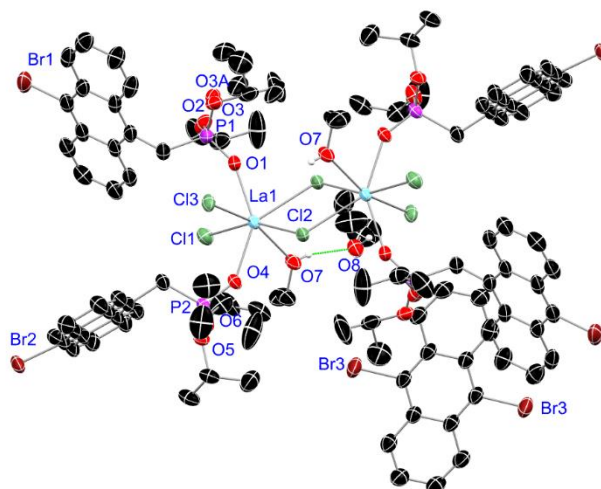

Figure 48: Asymmetric unit of **17**.

**17** crystallizes as  $C_{88}H_{108}Br_4Cl_6La_2O_{14}P_4 \cdot C_{14}H_8Br_2 \cdot 2EtOH$  in the space group  $P\bar{1}$ . The asymmetric unit contains half of the dimer as well as a co-crystallized EtOH and half of a 9,10-dibromoanthracene molecule. The other half is generated by an inversion center. One of the three anthracene-phosphonate ligands is missing and substituted by a coordinating EtOH molecule. Two *i*Pr groups and the co-crystallized EtOH molecule are disordered about two positions. In one of the *i*Pr group disorders, the bridging O-atom is involved as well. They are refined with distance restraints and partially with restraints for the anisotropic displacement parameters. The occupancy of the minor positions refined to 0.436(41), 0.476(19) and 0.462(20), respectively. The protons of the EtOH hydroxy groups are refined freely.

Bond lengths [Å] and angles [°] of **17**

|               |            |               |           |
|---------------|------------|---------------|-----------|
| La(1)–O(1)    | 2.417(3)   | O(3)–C(19)    | 1.421(13) |
| La(1)–Cl(1)   | 2.7684(13) | C(19)–C(20)   | 1.447(19) |
| La(1)–Cl(2)   | 2.8653(11) | C(19)–C(21)   | 1.518(15) |
| La(1)–Cl(2)#1 | 2.8796(12) | O(3A)–C(19A)  | 1.392(16) |
| La(1)–Cl(3)   | 2.8347(12) | C(19A)–C(20A) | 1.42(2)   |
| La(1)–O(4)    | 2.425(3)   | C(19A)–C(21A) | 1.501(17) |
| La(1)–O(7)    | 2.501(4)   | Br(2)–C(30)   | 1.904(5)  |
| Br(1)–C(9)    | 1.892(5)   | C(2)–C(3)     | 1.412(8)  |
| C(1)–P(1)     | 1.792(5)   | C(2)–C(15)    | 1.394(7)  |
| C(1)–C(2)     | 1.508(7)   | O(2)–C(16)    | 1.454(7)  |
| O(1)–P(1)     | 1.478(3)   | P(2)–O(4)     | 1.487(3)  |
| P(1)–O(3)     | 1.572(8)   | P(2)–O(5)     | 1.546(3)  |
| P(1)–O(3A)    | 1.571(11)  | P(2)–C(22)    | 1.780(5)  |
| P(1)–O(2)     | 1.545(4)   | P(2)–O(6)     | 1.562(4)  |

|             |          |                     |            |
|-------------|----------|---------------------|------------|
| C(3)–C(4)   | 1.423(8) | O(6)–C(40)          | 1.460(13)  |
| C(3)–C(8)   | 1.440(7) | O(6)–C(40A)         | 1.470(13)  |
| Br(3)–C(46) | 1.899(5) | C(40)–C(41)         | 1.52(2)    |
| C(4)–C(5)   | 1.364(8) | C(40)–C(42)         | 1.434(18)  |
| O(5)–C(37)  | 1.471(6) | C(40A)–C(41A)       | 1.53(2)    |
| C(5)–C(6)   | 1.397(8) | C(40A)–C(42A)       | 1.44(2)    |
| C(6)–C(7)   | 1.336(9) | C(43)–C(44)         | 1.470(9)   |
| C(9)–C(8)   | 1.392(8) | C(45)–C(46)         | 1.390(7)   |
| C(9)–C(10)  | 1.402(8) | C(45)–C(47)#2       | 1.433(7)   |
| C(8)–C(7)   | 1.428(8) | C(45)–C(51)#2       | 1.430(7)   |
| O(7)–H(7)   | 0.70(7)  | C(46)–C(47)         | 1.396(7)   |
| O(7)–C(43)  | 1.444(6) | C(47)–C(48)         | 1.420(7)   |
| C(10)–C(11) | 1.422(8) | C(48)–C(49)         | 1.361(8)   |
| C(10)–C(15) | 1.432(7) | C(49)–C(50)         | 1.387(8)   |
| C(12)–C(11) | 1.344(9) | C(50)–C(51)         | 1.355(8)   |
| C(12)–C(13) | 1.411(8) | O(8)–C(52)          | 1.409(12)  |
| C(13)–C(14) | 1.344(8) | O(8)–H(8)           | 0.79(5)    |
| C(14)–C(15) | 1.429(8) | O(8)–C(52A)         | 1.440(15)  |
| C(16)–C(17) | 1.459(9) | C(52)–C(53)         | 1.410(16)  |
| C(16)–C(18) | 1.475(9) | C(52A)–C(53A)       | 1.428(16)  |
| C(22)–C(23) | 1.515(6) |                     |            |
| C(23)–C(24) | 1.404(7) | O(1)–La(1)–Cl(1)    | 76.81(8)   |
| C(23)–C(36) | 1.408(7) | O(1)–La(1)–Cl(2)    | 72.85(8)   |
| C(24)–C(25) | 1.412(7) | O(1)–La(1)–Cl(2)#1  | 123.12(8)  |
| C(24)–C(29) | 1.442(7) | O(1)–La(1)–Cl(3)    | 78.70(9)   |
| C(25)–C(26) | 1.352(7) | O(1)–La(1)–O(4)     | 145.48(10) |
| C(26)–C(27) | 1.411(8) | O(1)–La(1)–O(7)     | 124.15(13) |
| C(27)–C(28) | 1.351(8) | Cl(1)–La(1)–Cl(2)   | 118.14(4)  |
| C(28)–C(29) | 1.429(7) | Cl(1)–La(1)–Cl(2)#1 | 159.74(4)  |
| C(29)–C(30) | 1.392(8) | Cl(1)–La(1)–Cl(3)   | 102.18(4)  |
| C(30)–C(31) | 1.392(7) | Cl(2)–La(1)–Cl(2)#1 | 75.19(4)   |
| C(31)–C(32) | 1.428(8) | Cl(3)–La(1)–Cl(2)#1 | 80.34(3)   |
| C(31)–C(36) | 1.439(6) | Cl(3)–La(1)–Cl(2)   | 122.19(3)  |
| C(32)–C(33) | 1.351(8) | O(4)–La(1)–Cl(1)    | 80.51(8)   |
| C(33)–C(34) | 1.409(7) | O(4)–La(1)–Cl(2)#1  | 80.04(8)   |
| C(34)–C(35) | 1.349(7) | O(4)–La(1)–Cl(2)    | 141.52(8)  |
| C(35)–C(36) | 1.429(7) | O(4)–La(1)–Cl(3)    | 81.09(8)   |
| C(37)–C(38) | 1.498(7) | O(4)–La(1)–O(7)     | 77.36(11)  |
| C(37)–C(39) | 1.517(8) | O(7)–La(1)–Cl(1)    | 82.33(10)  |

|                      |            |                   |          |
|----------------------|------------|-------------------|----------|
| O(7)–La(1)–Cl(2)     | 72.81(9)   | C(4)–C(5)–C(6)    | 120.2(6) |
| O(7)–La(1)–Cl(2)#1   | 87.92(10)  | C(7)–C(6)–C(5)    | 120.6(6) |
| O(7)–La(1)–Cl(3)     | 156.95(10) | C(8)–C(9)–Br(1)   | 119.0(4) |
| C(2)–C(1)–P(1)       | 118.7(4)   | C(8)–C(9)–C(10)   | 122.6(5) |
| P(1)–O(1)–La(1)      | 152.06(19) | C(10)–C(9)–Br(1)  | 118.4(4) |
| O(1)–P(1)–C(1)       | 111.7(2)   | C(9)–C(8)–C(3)    | 118.7(5) |
| O(1)–P(1)–O(3)       | 107.9(6)   | C(9)–C(8)–C(7)    | 123.8(5) |
| O(1)–P(1)–O(3A)      | 119.3(7)   | C(7)–C(8)–C(3)    | 117.5(6) |
| O(1)–P(1)–O(2)       | 114.3(2)   | La(1)–O(7)–H(7)   | 119(6)   |
| O(3)–P(1)–C(1)       | 104.0(6)   | C(43)–O(7)–La(1)  | 129.4(3) |
| O(3A)–P(1)–C(1)      | 110.2(8)   | C(43)–O(7)–H(7)   | 111(6)   |
| O(2)–P(1)–C(1)       | 108.0(2)   | C(6)–C(7)–C(8)    | 122.4(6) |
| O(2)–P(1)–O(3)       | 110.4(7)   | C(9)–C(10)–C(11)  | 122.7(5) |
| O(2)–P(1)–O(3A)      | 91.5(9)    | C(9)–C(10)–C(15)  | 117.7(5) |
| C(19)–O(3)–P(1)      | 125.9(11)  | C(11)–C(10)–C(15) | 119.6(5) |
| O(3)–C(19)–C(20)     | 115.4(13)  | C(11)–C(12)–C(13) | 119.8(6) |
| O(3)–C(19)–C(21)     | 104.7(12)  | C(12)–C(11)–C(10) | 121.4(5) |
| C(20)–C(19)–C(21)    | 112.8(13)  | C(14)–C(13)–C(12) | 120.7(6) |
| C(19A)–O(3A)–P(1)    | 125.2(13)  | C(13)–C(14)–C(15) | 122.4(5) |
| O(3A)–C(19A)–C(20A)  | 122(2)     | C(2)–C(15)–C(10)  | 121.3(5) |
| O(3A)–C(19A)–C(21A)  | 109.5(17)  | C(2)–C(15)–C(14)  | 122.6(5) |
| C(20A)–C(19A)–C(21A) | 119.8(16)  | C(14)–C(15)–C(10) | 116.2(5) |
| C(3)–C(2)–C(1)       | 119.0(5)   | O(2)–C(16)–C(17)  | 110.8(6) |
| C(15)–C(2)–C(1)      | 121.1(5)   | O(2)–C(16)–C(18)  | 106.8(6) |
| C(15)–C(2)–C(3)      | 119.9(5)   | C(17)–C(16)–C(18) | 113.1(6) |
| C(16)–O(2)–P(1)      | 126.7(4)   | C(23)–C(22)–P(2)  | 117.6(4) |
| O(4)–P(2)–O(5)       | 113.45(18) | C(24)–C(23)–C(22) | 120.5(5) |
| O(4)–P(2)–C(22)      | 110.4(2)   | C(24)–C(23)–C(36) | 120.6(4) |
| O(4)–P(2)–O(6)       | 112.06(19) | C(36)–C(23)–C(22) | 118.8(4) |
| O(5)–P(2)–C(22)      | 104.8(2)   | C(23)–C(24)–C(25) | 122.2(4) |
| O(5)–P(2)–O(6)       | 105.5(2)   | C(23)–C(24)–C(29) | 119.7(5) |
| O(6)–P(2)–C(22)      | 110.3(2)   | C(25)–C(24)–C(29) | 118.1(5) |
| La(1)–Cl(2)–La(1)#1  | 104.81(4)  | C(26)–C(25)–C(24) | 122.0(5) |
| C(2)–C(3)–C(4)       | 122.5(5)   | C(25)–C(26)–C(27) | 120.2(6) |
| C(2)–C(3)–C(8)       | 119.7(5)   | C(28)–C(27)–C(26) | 120.3(5) |
| C(4)–C(3)–C(8)       | 117.8(5)   | C(27)–C(28)–C(29) | 121.5(5) |
| C(5)–C(4)–C(3)       | 121.6(5)   | C(28)–C(29)–C(24) | 117.8(5) |
| P(2)–O(4)–La(1)      | 146.3(2)   | C(30)–C(29)–C(24) | 118.6(5) |
| C(37)–O(5)–P(2)      | 128.9(3)   | C(30)–C(29)–C(28) | 123.6(5) |

|                    |           |                       |           |
|--------------------|-----------|-----------------------|-----------|
| C(29)–C(30)–Br(2)  | 118.3(4)  | C(42A)–C(40A)–O(6)    | 108.2(16) |
| C(29)–C(30)–C(31)  | 122.8(5)  | C(42A)–C(40A)–C(41A)  | 110.6(15) |
| C(31)–C(30)–Br(2)  | 118.8(4)  | O(7)–C(43)–C(44)      | 111.4(5)  |
| C(30)–C(31)–C(32)  | 123.2(5)  | C(46)–C(45)–C(47)#2   | 118.5(5)  |
| C(30)–C(31)–C(36)  | 118.6(5)  | C(46)–C(45)–C(51)#2   | 123.7(5)  |
| C(32)–C(31)–C(36)  | 118.2(5)  | C(51)#2–C(45)–C(47)#2 | 117.8(5)  |
| C(33)–C(32)–C(31)  | 121.6(5)  | C(45)–C(46)–Br(3)     | 118.6(4)  |
| C(32)–C(33)–C(34)  | 120.3(5)  | C(45)–C(46)–C(47)     | 123.4(5)  |
| C(35)–C(34)–C(33)  | 120.6(5)  | C(47)–C(46)–Br(3)     | 118.0(4)  |
| C(34)–C(35)–C(36)  | 121.8(5)  | C(46)–C(47)–C(45)#2   | 118.1(5)  |
| C(23)–C(36)–C(31)  | 119.7(4)  | C(46)–C(47)–C(48)     | 123.9(5)  |
| C(23)–C(36)–C(35)  | 122.7(4)  | C(48)–C(47)–C(45)#2   | 118.0(5)  |
| C(35)–C(36)–C(31)  | 117.6(5)  | C(49)–C(48)–C(47)     | 121.9(5)  |
| O(5)–C(37)–C(38)   | 105.8(4)  | C(48)–C(49)–C(50)     | 119.9(6)  |
| O(5)–C(37)–C(39)   | 108.0(4)  | C(51)–C(50)–C(49)     | 121.2(5)  |
| C(38)–C(37)–C(39)  | 113.6(5)  | C(50)–C(51)–C(45)#2   | 121.2(5)  |
| C(40)–O(6)–P(2)    | 127.8(11) | C(52)–O(8)–H(8)       | 108(4)    |
| C(40A)–O(6)–P(2)   | 119.1(9)  | C(52A)–O(8)–H(8)      | 101(4)    |
| O(6)–C(40)–C(41)   | 104.8(14) | O(8)–C(52)–C(53)      | 113.9(13) |
| C(42)–C(40)–O(6)   | 108.0(13) | C(53A)–C(52A)–O(8)    | 113.5(15) |
| C(42)–C(40)–C(41)  | 114.1(16) |                       |           |
| O(6)–C(40A)–C(41A) | 110.3(13) |                       |           |

## ***checkCIF/PLATON report***

*Structure factors have been supplied for datablock(s) i2974*

***THIS REPORT IS FOR GUIDANCE ONLY. IF USED AS PART OF A REVIEW PROCEDURE FOR PUBLICATION, IT SHOULD NOT REPLACE THE EXPERTISE OF AN EXPERIENCED CRYSTALLOGRAPHIC REFEREE.***

*No syntax errors found.      CIF dictionary      Interpreting this report*

### ***Datablock: i2974***

*Bond precision:    C–C = 0.0080 Å*

*Wavelength=0.71073*

*Cell:                    a=13.4455 (5)                    b=13.7347 (6)                    c=15.6918 (7)  
                              alpha=97.274 (3)                beta=98.726 (3)                gamma=93.626 (3)*

*Temperature:        100 K*

|               |                   |                   |
|---------------|-------------------|-------------------|
|               | <i>Calculated</i> | <i>Reported</i>   |
| <i>Volume</i> | <i>2831.2 (2)</i> | <i>2831.1 (2)</i> |

|                |                                                         |                                                         |
|----------------|---------------------------------------------------------|---------------------------------------------------------|
| Space group    | P -1                                                    | P -1                                                    |
| Hall group     | -P 1                                                    | -P 1                                                    |
| Moiety formula | C88 H108 Br4 Cl6 La2 O14                                | C88 H108 Br4 Cl6 La2 O14                                |
| Sum formula    | P4, C14 H8 Br2, 2(C2 H6 O)<br>C106 H128 Br6 Cl6 La2 O16 | P4, C14 H8 Br2, 2(C2 H6 O)<br>C106 H128 Br6 Cl6 La2 O16 |
| Mr             | 2751.89                                                 | 2751.94                                                 |
| Dx, g cm-3     | 1.614                                                   | 1.614                                                   |
| Z              | 1                                                       | 1                                                       |
| Mu (mm-1)      | 3.120                                                   | 3.120                                                   |
| F000           | 1378.0                                                  | 1378.0                                                  |
| F000'          | 1377.49                                                 |                                                         |
| h,k,lmax       | 17,17,19                                                | 17,17,19                                                |
| Nref           | 12141                                                   | 11968                                                   |
| Tmin,Tmax      | 0.721,0.856                                             | 0.581,0.840                                             |
| Tmin'          | 0.660                                                   |                                                         |

Correction method= # Reported T Limits: Tmin=0.581 Tmax=0.840  
AbsCorr = MULTI-SCAN

Data completeness= 0.986                      Theta(max)= 26.834

R(reflections)= 0.0437( 8675)              wR2(reflections)= 0.1035( 11968)

S = 1.079                                      Npar= 738

The following ALERTS were generated. Each ALERT has the format

**test-name\_ALERT\_alert-type\_alert-level.**

Click on the hyperlinks for more details of the test.

### ● Alert level C

|                                                                    |                                 |       |        |
|--------------------------------------------------------------------|---------------------------------|-------|--------|
| PLAT213_ALERT_2_C Atom C20A                                        | has ADP max/min Ratio .....     | 3.6   | prolat |
| PLAT220_ALERT_2_C NonSolvent Resd 1 C                              | Ueq(max) / Ueq(min) Range       | 3.3   | Ratio  |
| PLAT223_ALERT_4_C Solv./Anion Resd 3 H                             | Ueq(max)/Ueq(min) Range         | 4.3   | Ratio  |
| PLAT242_ALERT_2_C Low MainMol                                      | Ueq as Compared to Neighbors of | C16   | Check  |
| PLAT244_ALERT_4_C Low Solvent                                      | Ueq as Compared to Neighbors of | O8    | Check  |
| PLAT245_ALERT_2_C U(iso) H8                                        | Smaller than U(eq) O8           | 0.017 | Ang**2 |
| PLAT250_ALERT_2_C Large U3/U1 Ratio for Average U(i,j) Tensor .... |                                 | 2.1   | Note   |
| PLAT354_ALERT_3_C Short O-H (X0.82,N0.98A) O7                      | - H7                            | 0.70  | Ang.   |
| PLAT410_ALERT_2_C Short Intra H...H Contact H1A                    | ..H4                            | 1.99  | Ang.   |
|                                                                    | x,y,z =                         | 1_555 | Check  |
| PLAT906_ALERT_3_C Large K Value in the Analysis of Variance .....  |                                 | 2.719 | Check  |
| PLAT911_ALERT_3_C Missing FCF Refl Between Thmin & STh/L=          | 0.600                           | 33    | Report |
| PLAT978_ALERT_2_C Number C-C Bonds with Positive Residual Density. |                                 | 0     | Info   |

### ● Alert level G

|                                                                    |           |       |        |
|--------------------------------------------------------------------|-----------|-------|--------|
| PLAT002_ALERT_2_G Number of Distance or Angle Restraints on AtSite |           | 21    | Note   |
| PLAT003_ALERT_2_G Number of Uiso or Uij Restrained non-H Atoms ... |           | 14    | Report |
| PLAT083_ALERT_2_G SHELXL Second Parameter in WGHT Unusually Large  |           | 9.82  | Why ?  |
| PLAT154_ALERT_1_G The s.u.'s on the Cell Angles are Equal ..(Note) |           | 0.003 | Degree |
| PLAT175_ALERT_4_G The CIF-Embedded .res File Contains SAME Records |           | 3     | Report |
| PLAT178_ALERT_4_G The CIF-Embedded .res File Contains SIMU Records |           | 4     | Report |
| PLAT187_ALERT_4_G The CIF-Embedded .res File Contains RIGU Records |           | 1     | Report |
| PLAT301_ALERT_3_G Main Residue Disorder .....                      | (Resd 1 ) | 12%   | Note   |
| PLAT302_ALERT_4_G Anion/Solvent/Minor-Residue Disorder (Resd 3 )   |           | 67%   | Note   |

|                   |                                                  |                       |             |
|-------------------|--------------------------------------------------|-----------------------|-------------|
| PLAT398_ALERT_2_G | Deviating C-O-C                                  | Angle From 120 for O8 | 27.4 Degree |
| PLAT414_ALERT_2_G | Short Intra D-H..H-X                             | H8 ..H52B             | 2.06 Ang.   |
|                   |                                                  | x,y,z =               | 1_555 Check |
| PLAT414_ALERT_2_G | Short Intra D-H..H-X                             | H8 ..H52D             | 1.92 Ang.   |
|                   |                                                  | x,y,z =               | 1_555 Check |
| PLAT793_ALERT_4_G | Model has Chirality at P2                        | (Centro SPGR)         | S Verify    |
| PLAT794_ALERT_5_G | Tentative Bond Valency for La1                   | (III)                 | 3.26 Info   |
| PLAT860_ALERT_3_G | Number of Least-Squares Restraints .....         |                       | 95 Note     |
| PLAT883_ALERT_1_G | No Info/Value for _atom_sites_solution_primary   |                       | Please Do!  |
| PLAT912_ALERT_4_G | Missing # of FCF Reflections Above STh/L=        | 0.600                 | 142 Note    |
| PLAT933_ALERT_2_G | Number of OMIT Records in Embedded .res File ... |                       | 12 Note     |

## 2.10 Complex 18

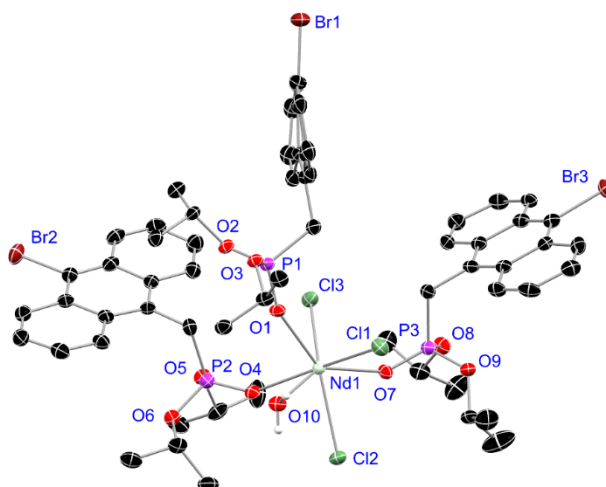

Figure 49: Asymmetric unit of **18**.

**18** crystallizes as  $C_{63}H_{74}Br_3Cl_3NdO_{10}P_3$  in the space group  $P\bar{1}$ . The asymmetric unit contains one monomeric molecule. The  $H_2O$  molecule coordinates to the Nd ion to complete its coordination sphere and its protons are refined freely.

Bond lengths [Å] and angles [°] of **18**

|             |            |             |          |
|-------------|------------|-------------|----------|
| Nd(1)–O(1)  | 2.388(3)   | C(2)–C(15)  | 1.409(8) |
| Nd(1)–Cl(1) | 2.7405(14) | O(3)–C(19)  | 1.490(6) |
| Nd(1)–Cl(2) | 2.7535(13) | P(3)–O(9)   | 1.553(4) |
| Nd(1)–Cl(3) | 2.7987(14) | P(3)–O(8)   | 1.568(4) |
| Nd(1)–O(4)  | 2.357(4)   | P(3)–O(7)   | 1.477(4) |
| Nd(1)–O(7)  | 2.388(4)   | P(3)–C(43)  | 1.778(5) |
| Nd(1)–O(10) | 2.551(4)   | Br(3)–C(51) | 1.899(6) |
| C(1)–P(1)   | 1.795(6)   | C(3)–C(4)   | 1.417(8) |
| C(1)–C(2)   | 1.524(7)   | C(3)–C(8)   | 1.451(8) |
| Br(1)–C(9)  | 1.909(5)   | C(4)–C(5)   | 1.365(8) |
| O(1)–P(1)   | 1.483(3)   | O(9)–C(61)  | 1.466(6) |
| P(1)–O(2)   | 1.548(4)   | C(9)–C(8)   | 1.383(8) |
| P(1)–O(3)   | 1.565(4)   | C(9)–C(10)  | 1.400(8) |
| O(2)–C(16)  | 1.484(6)   | O(8)–C(58)  | 1.478(6) |
| P(2)–O(4)   | 1.488(4)   | C(8)–C(7)   | 1.447(8) |
| P(2)–O(6)   | 1.564(4)   | C(7)–C(6)   | 1.339(9) |
| P(2)–O(5)   | 1.550(4)   | O(6)–C(40)  | 1.474(7) |
| P(2)–C(22)  | 1.793(5)   | C(6)–C(5)   | 1.409(9) |
| Br(2)–C(30) | 1.913(6)   | O(5)–C(37)  | 1.471(6) |
| C(2)–C(3)   | 1.395(8)   | C(21)–C(19) | 1.503(8) |

|              |          |                   |            |
|--------------|----------|-------------------|------------|
| C(20)–C(19)  | 1.506(8) | C(56)–C(57)       | 1.442(8)   |
| C(22)–C(23)  | 1.511(8) | C(57)–C(44)       | 1.410(8)   |
| C(23)–C(24)  | 1.398(8) | C(58)–C(59)       | 1.493(9)   |
| C(23)–C(36)  | 1.402(8) | C(58)–C(60)       | 1.511(9)   |
| C(10)–C(11)  | 1.422(9) | C(61)–C(62)       | 1.488(9)   |
| C(10)–C(15)  | 1.437(7) | C(61)–C(63)       | 1.484(8)   |
| O(10)–H(10A) | 0.89(6)  | C(50)–C(49)       | 1.417(8)   |
| O(10)–H(10B) | 0.77(9)  | C(50)–C(45)       | 1.444(8)   |
| C(11)–C(12)  | 1.364(9) | C(49)–C(48)       | 1.348(8)   |
| C(12)–C(13)  | 1.409(9) | C(48)–C(47)       | 1.420(9)   |
| C(13)–C(14)  | 1.366(9) | C(47)–C(46)       | 1.357(8)   |
| C(14)–C(15)  | 1.431(8) | C(46)–C(45)       | 1.425(8)   |
| C(18)–C(16)  | 1.503(8) | C(45)–C(44)       | 1.415(8)   |
| C(17)–C(16)  | 1.506(8) | C(44)–C(43)       | 1.509(8)   |
| C(24)–C(25)  | 1.432(8) |                   |            |
| C(24)–C(29)  | 1.454(8) | O(1)–Nd(1)–Cl(1)  | 81.32(10)  |
| C(25)–C(26)  | 1.358(8) | O(1)–Nd(1)–Cl(2)  | 144.86(9)  |
| C(31)–C(30)  | 1.384(8) | O(1)–Nd(1)–Cl(3)  | 75.16(9)   |
| C(31)–C(32)  | 1.437(8) | O(1)–Nd(1)–O(10)  | 72.08(13)  |
| C(31)–C(36)  | 1.439(8) | Cl(1)–Nd(1)–Cl(2) | 95.81(4)   |
| C(30)–C(29)  | 1.384(8) | Cl(1)–Nd(1)–Cl(3) | 112.42(4)  |
| C(29)–C(28)  | 1.430(8) | Cl(2)–Nd(1)–Cl(3) | 135.92(4)  |
| C(26)–C(27)  | 1.399(9) | O(4)–Nd(1)–O(1)   | 89.61(12)  |
| C(32)–C(33)  | 1.358(9) | O(4)–Nd(1)–Cl(1)  | 160.38(9)  |
| C(33)–C(34)  | 1.413(9) | O(4)–Nd(1)–Cl(2)  | 81.62(9)   |
| C(27)–C(28)  | 1.342(9) | O(4)–Nd(1)–Cl(3)  | 81.57(9)   |
| C(34)–C(35)  | 1.354(8) | O(4)–Nd(1)–O(7)   | 116.14(12) |
| C(41)–C(40)  | 1.514(8) | O(4)–Nd(1)–O(10)  | 78.21(13)  |
| C(40)–C(42)  | 1.509(9) | O(7)–Nd(1)–O(1)   | 136.67(12) |
| C(39)–C(37)  | 1.502(9) | O(7)–Nd(1)–Cl(1)  | 81.73(9)   |
| C(38)–C(37)  | 1.484(9) | O(7)–Nd(1)–Cl(2)  | 76.43(9)   |
| C(36)–C(35)  | 1.442(8) | O(7)–Nd(1)–Cl(3)  | 75.10(9)   |
| C(51)–C(52)  | 1.393(8) | O(7)–Nd(1)–O(10)  | 143.59(13) |
| C(51)–C(50)  | 1.398(8) | O(10)–Nd(1)–Cl(1) | 82.44(10)  |
| C(52)–C(53)  | 1.435(8) | O(10)–Nd(1)–Cl(2) | 72.82(10)  |
| C(52)–C(57)  | 1.423(8) | O(10)–Nd(1)–Cl(3) | 141.31(10) |
| C(53)–C(54)  | 1.351(8) | C(2)–C(1)–P(1)    | 118.0(4)   |
| C(54)–C(55)  | 1.402(9) | P(1)–O(1)–Nd(1)   | 155.9(2)   |
| C(55)–C(56)  | 1.346(8) | O(1)–P(1)–C(1)    | 112.0(2)   |



|                  |          |                     |          |
|------------------|----------|---------------------|----------|
| O(1)–P(1)–O(2)   | 109.3(2) | C(37)–O(5)–P(2)     | 122.4(3) |
| O(1)–P(1)–O(3)   | 113.3(2) | C(4)–C(5)–C(6)      | 119.7(6) |
| O(2)–P(1)–C(1)   | 109.1(2) | C(23)–C(22)–P(2)    | 116.1(4) |
| O(2)–P(1)–O(3)   | 106.7(2) | C(24)–C(23)–C(22)   | 119.2(5) |
| O(3)–P(1)–C(1)   | 106.2(2) | C(24)–C(23)–C(36)   | 120.2(5) |
| C(16)–O(2)–P(1)  | 127.0(3) | C(36)–C(23)–C(22)   | 120.6(5) |
| O(4)–P(2)–O(6)   | 111.8(2) | C(9)–C(10)–C(11)    | 123.0(5) |
| O(4)–P(2)–O(5)   | 115.9(2) | C(9)–C(10)–C(15)    | 118.0(5) |
| O(4)–P(2)–C(22)  | 110.5(2) | C(11)–C(10)–C(15)   | 119.0(5) |
| O(6)–P(2)–C(22)  | 110.5(2) | H(10A)–O(10)–H(10B) | 108(8)   |
| O(5)–P(2)–O(6)   | 103.8(2) | C(12)–C(11)–C(10)   | 121.1(5) |
| O(5)–P(2)–C(22)  | 103.9(2) | C(11)–C(12)–C(13)   | 119.9(6) |
| C(3)–C(2)–C(1)   | 120.4(5) | C(14)–C(13)–C(12)   | 121.2(6) |
| C(3)–C(2)–C(15)  | 120.7(5) | C(13)–C(14)–C(15)   | 120.7(5) |
| C(15)–C(2)–C(1)  | 118.9(5) | O(3)–C(19)–C(21)    | 107.2(5) |
| C(19)–O(3)–P(1)  | 120.5(3) | O(3)–C(19)–C(20)    | 106.8(4) |
| O(9)–P(3)–O(8)   | 106.9(2) | C(21)–C(19)–C(20)   | 114.7(5) |
| O(9)–P(3)–C(43)  | 104.1(2) | O(2)–C(16)–C(18)    | 105.8(4) |
| O(8)–P(3)–C(43)  | 105.5(2) | O(2)–C(16)–C(17)    | 108.3(4) |
| O(7)–P(3)–O(9)   | 113.2(2) | C(18)–C(16)–C(17)   | 111.8(5) |
| O(7)–P(3)–O(8)   | 112.2(2) | C(2)–C(15)–C(10)    | 119.8(5) |
| O(7)–P(3)–C(43)  | 114.2(2) | C(2)–C(15)–C(14)    | 122.5(5) |
| C(2)–C(3)–C(4)   | 123.0(5) | C(14)–C(15)–C(10)   | 117.7(5) |
| C(2)–C(3)–C(8)   | 119.6(5) | C(23)–C(24)–C(25)   | 123.1(5) |
| C(4)–C(3)–C(8)   | 117.5(5) | C(23)–C(24)–C(29)   | 119.6(5) |
| P(2)–O(4)–Nd(1)  | 147.7(2) | C(25)–C(24)–C(29)   | 117.3(5) |
| C(5)–C(4)–C(3)   | 122.3(5) | C(26)–C(25)–C(24)   | 121.6(6) |
| C(61)–O(9)–P(3)  | 123.6(3) | C(30)–C(31)–C(32)   | 123.3(5) |
| C(8)–C(9)–Br(1)  | 117.9(4) | C(30)–C(31)–C(36)   | 117.8(5) |
| C(8)–C(9)–C(10)  | 123.0(5) | C(32)–C(31)–C(36)   | 118.8(5) |
| C(10)–C(9)–Br(1) | 119.0(4) | C(31)–C(30)–Br(2)   | 118.0(4) |
| C(58)–O(8)–P(3)  | 123.8(4) | C(29)–C(30)–Br(2)   | 118.5(4) |
| C(9)–C(8)–C(3)   | 118.4(5) | C(29)–C(30)–C(31)   | 123.5(5) |
| C(9)–C(8)–C(7)   | 123.8(5) | C(30)–C(29)–C(24)   | 118.2(5) |
| C(7)–C(8)–C(3)   | 117.9(5) | C(30)–C(29)–C(28)   | 124.1(5) |
| P(3)–O(7)–Nd(1)  | 140.2(2) | C(28)–C(29)–C(24)   | 117.6(5) |
| C(6)–C(7)–C(8)   | 121.1(5) | C(25)–C(26)–C(27)   | 120.8(6) |
| C(40)–O(6)–P(2)  | 121.3(3) | C(33)–C(32)–C(31)   | 120.8(6) |
| C(7)–C(6)–C(5)   | 121.3(5) | C(32)–C(33)–C(34)   | 120.5(6) |

|                   |          |                   |          |
|-------------------|----------|-------------------|----------|
| C(28)–C(27)–C(26) | 120.4(6) | C(52)–C(57)–C(56) | 117.6(5) |
| C(27)–C(28)–C(29) | 122.2(6) | C(44)–C(57)–C(52) | 120.4(5) |
| C(35)–C(34)–C(33) | 120.9(6) | C(44)–C(57)–C(56) | 122.0(5) |
| O(6)–C(40)–C(41)  | 110.2(5) | O(8)–C(58)–C(59)  | 108.5(5) |
| O(6)–C(40)–C(42)  | 106.5(5) | O(8)–C(58)–C(60)  | 106.0(5) |
| C(42)–C(40)–C(41) | 112.2(5) | C(59)–C(58)–C(60) | 113.9(5) |
| O(5)–C(37)–C(39)  | 106.2(5) | O(9)–C(61)–C(62)  | 109.6(5) |
| O(5)–C(37)–C(38)  | 108.1(5) | O(9)–C(61)–C(63)  | 106.6(5) |
| C(38)–C(37)–C(39) | 115.4(5) | C(63)–C(61)–C(62) | 113.0(6) |
| C(23)–C(36)–C(31) | 120.7(5) | C(51)–C(50)–C(49) | 124.0(5) |
| C(23)–C(36)–C(35) | 122.0(5) | C(51)–C(50)–C(45) | 117.6(5) |
| C(31)–C(36)–C(35) | 117.4(5) | C(49)–C(50)–C(45) | 118.4(5) |
| C(34)–C(35)–C(36) | 121.4(6) | C(48)–C(49)–C(50) | 122.0(5) |
| C(52)–C(51)–Br(3) | 118.5(4) | C(49)–C(48)–C(47) | 120.1(5) |
| C(52)–C(51)–C(50) | 123.7(5) | C(46)–C(47)–C(48) | 120.1(6) |
| C(50)–C(51)–Br(3) | 117.8(4) | C(47)–C(46)–C(45) | 121.8(5) |
| C(51)–C(52)–C(53) | 122.8(5) | C(46)–C(45)–C(50) | 117.5(5) |
| C(51)–C(52)–C(57) | 118.2(5) | C(44)–C(45)–C(50) | 119.8(5) |
| C(57)–C(52)–C(53) | 118.9(5) | C(44)–C(45)–C(46) | 122.7(5) |
| C(54)–C(53)–C(52) | 121.2(6) | C(57)–C(44)–C(45) | 120.3(5) |
| C(53)–C(54)–C(55) | 119.5(6) | C(57)–C(44)–C(43) | 120.4(5) |
| C(56)–C(55)–C(54) | 122.3(6) | C(45)–C(44)–C(43) | 119.3(5) |
| C(55)–C(56)–C(57) | 120.4(6) | C(44)–C(43)–P(3)  | 115.3(4) |

### ***checkCIF/PLATON report***

*Structure factors have been supplied for datablock(s) i2983*

***THIS REPORT IS FOR GUIDANCE ONLY. IF USED AS PART OF A REVIEW PROCEDURE FOR PUBLICATION, IT SHOULD NOT REPLACE THE EXPERTISE OF AN EXPERIENCED CRYSTALLOGRAPHIC REFEREE.***

*No syntax errors found.      CIF dictionary      Interpreting this report*

---

### ***Datablock: i2983***

*Bond precision:    C–C = 0.0094 Å                      Wavelength=0.71073*

*Cell:                      a=13.6169 (7)                      b=15.8635 (9)                      c=17.6449 (8)*  
*alpha=103.591 (4)                      beta=100.785 (4)                      gamma=111.726 (4)*

*Temperature:    100 K*

|                | Calculated    | Reported      |
|----------------|---------------|---------------|
| Volume         | 3279.2(3)     | 3279.2(3)     |
| Space group    | P -1          | P -1          |
| Hall group     | -P 1          | -P 1          |
| Moiety formula | C63 H74 Br3   | C63 H74 Br3   |
|                | C13 Nd O10 P3 | C13 Nd O10 P3 |
| Sum formula    | C63 H74 Br3   | C63 H74 Br3   |
|                | C13 Nd O10 P3 | C13 Nd O10 P3 |
| Mr             | 1574.43       | 1574.45       |
| Dx,g cm-3      | 1.594         | 1.595         |
| Z              | 2             | 2             |
| Mu (mm-1)      | 2.870         | 2.870         |
| F000           | 1586.0        | 1586.0        |
| F000'          | 1585.96       |               |
| h,k,lmax       | 17,20,22      | 17,20,22      |
| Nref           | 14104         | 13831         |
| Tmin,Tmax      | 0.733,0.944   | 0.490,0.936   |
| Tmin'          | 0.512         |               |

Correction method= # Reported T Limits: Tmin=0.490 Tmax=0.936  
AbsCorr = MULTI-SCAN

Data completeness= 0.981

Theta(max)= 26.851

R(reflections)= 0.0477( 9355)

wR2(reflections)= 0.1118( 13831)

S = 1.057

Npar= 768

The following ALERTS were generated. Each ALERT has the format

**test-name\_ALERT\_alert-type\_alert-level.**

Click on the hyperlinks for more details of the test.

### ● Alert level C

|                                                                    |                     |
|--------------------------------------------------------------------|---------------------|
| PLAT220_ALERT_2_C NonSolvent Resd 1 C Ueq(max) / Ueq(min) Range    | 3.4 Ratio           |
| PLAT242_ALERT_2_C Low MainMol Ueq as Compared to Neighbors of      | C61 Check           |
| PLAT342_ALERT_3_C Low Bond Precision on C-C Bonds .....            | 0.00944 Ang.        |
| PLAT410_ALERT_2_C Short Intra H...H Contact H22A ..H35 .           | 1.97 Ang.           |
|                                                                    | x,y,z = 1_555 Check |
| PLAT410_ALERT_2_C Short Intra H...H Contact H22B ..H25 .           | 1.99 Ang.           |
|                                                                    | x,y,z = 1_555 Check |
| PLAT410_ALERT_2_C Short Intra H...H Contact H43A ..H46 .           | 1.99 Ang.           |
|                                                                    | x,y,z = 1_555 Check |
| PLAT911_ALERT_3_C Missing FCF Refl Between Thmin & STh/L= 0.600    | 64 Report           |
| PLAT976_ALERT_2_C Check Calcd Resid. Dens. 1.04A From O10          | -0.42 eA-3          |
| PLAT978_ALERT_2_C Number C-C Bonds with Positive Residual Density. | 0 Info              |

### ● Alert level G

|                                                                    |              |
|--------------------------------------------------------------------|--------------|
| PLAT002_ALERT_2_G Number of Distance or Angle Restraints on AtSite | 6 Note       |
| PLAT083_ALERT_2_G SHELXL Second Parameter in WGHT Unusually Large  | 12.26 Why ?  |
| PLAT154_ALERT_1_G The s.u.'s on the Cell Angles are Equal ..(Note) | 0.004 Degree |
| PLAT175_ALERT_4_G The CIF-Embedded .res File Contains SAME Records | 1 Report     |
| PLAT794_ALERT_5_G Tentative Bond Valency for Nd1 (III) .           | 3.18 Info    |
| PLAT883_ALERT_1_G No Info/Value for _atom_sites_solution_primary . | Please Do !  |
| PLAT912_ALERT_4_G Missing # of FCF Reflections Above STh/L= 0.600  | 209 Note     |
| PLAT933_ALERT_2_G Number of OMIT Records in Embedded .res File ... | 10 Note      |

## 2.11 Complex 19

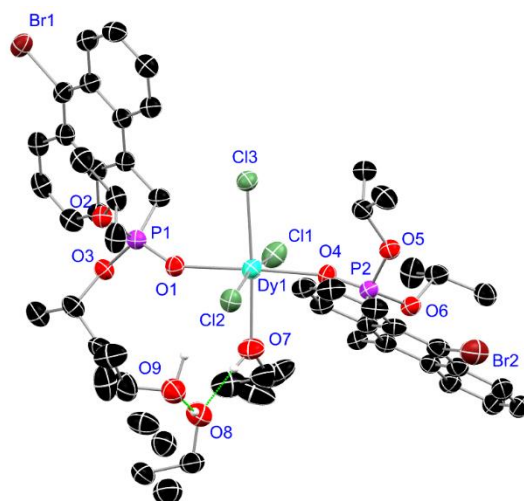

Figure 50: Asymmetric unit of **19**.

**19** crystallizes as  $C_{44}H_{54}Br_2Cl_3DyO_7P_2 \cdot 2EtOH$  in the space group  $P\bar{1}$ . The asymmetric unit contains one monomeric molecule. One of the three anthracene-phosphonate ligands is missing and replaced by a coordinating EtOH molecule. The other two EtOH molecules are co-crystallized and connected via a two-dimensional hydrogen-bond network. The protons of the EtOH hydroxy groups are refined freely. All three ethyl residues are disordered about two positions. They are partially refined with distance restraints and restraints for the anisotropic displacement parameters. The minor positions refined to 0.345(53), 0.468(14) and 0.306(11), respectively.

Bond lengths [Å] and angles [°] of **19**

|             |            |             |          |
|-------------|------------|-------------|----------|
| Dy(1)–O(1)  | 2.255(3)   | Br(2)–C(30) | 1.909(4) |
| Dy(1)–Cl(1) | 2.6030(10) | C(2)–C(3)   | 1.405(5) |
| Dy(1)–Cl(2) | 2.6434(9)  | C(2)–C(15)  | 1.414(5) |
| Dy(1)–Cl(3) | 2.5885(10) | O(2)–C(16)  | 1.479(5) |
| Dy(1)–O(4)  | 2.251(3)   | O(3)–C(19)  | 1.472(5) |
| Dy(1)–O(7)  | 2.354(3)   | C(3)–C(4)   | 1.439(6) |
| C(1)–P(1)   | 1.791(4)   | C(3)–C(8)   | 1.443(6) |
| C(1)–C(2)   | 1.515(6)   | O(5)–C(37)  | 1.476(5) |
| Br(1)–C(9)  | 1.913(4)   | C(5)–C(4)   | 1.353(6) |
| P(1)–O(1)   | 1.487(3)   | C(5)–C(6)   | 1.419(7) |
| P(1)–O(2)   | 1.562(3)   | C(7)–C(6)   | 1.366(7) |
| P(1)–O(3)   | 1.555(3)   | C(7)–C(8)   | 1.426(6) |
| P(2)–O(5)   | 1.567(3)   | O(6)–C(40)  | 1.487(4) |
| P(2)–O(4)   | 1.490(3)   | C(9)–C(8)   | 1.394(6) |
| P(2)–O(6)   | 1.558(3)   | C(9)–C(10)  | 1.391(6) |
| P(2)–C(22)  | 1.798(4)   | C(10)–C(11) | 1.427(6) |

|               |           |                   |            |
|---------------|-----------|-------------------|------------|
| C(10)–C(15)   | 1.447(6)  | O(9)–C(47)        | 1.489(9)   |
| C(11)–C(12)   | 1.356(7)  | C(48)–C(47)       | 1.445(11)  |
| C(12)–C(13)   | 1.410(7)  |                   |            |
| C(13)–C(14)   | 1.359(6)  | O(1)–Dy(1)–Cl(1)  | 92.18(7)   |
| C(14)–C(15)   | 1.431(6)  | O(1)–Dy(1)–Cl(2)  | 88.94(7)   |
| C(16)–C(17)   | 1.497(7)  | O(1)–Dy(1)–Cl(3)  | 87.41(8)   |
| C(16)–C(18)   | 1.506(7)  | O(1)–Dy(1)–O(7)   | 88.97(12)  |
| C(19)–C(20)   | 1.500(6)  | Cl(1)–Dy(1)–Cl(2) | 169.12(4)  |
| C(19)–C(21)   | 1.492(7)  | Cl(3)–Dy(1)–Cl(1) | 93.28(3)   |
| C(22)–C(23)   | 1.511(5)  | Cl(3)–Dy(1)–Cl(2) | 97.57(3)   |
| C(23)–C(24)   | 1.406(6)  | O(4)–Dy(1)–O(1)   | 175.51(9)  |
| C(23)–C(36)   | 1.411(5)  | O(4)–Dy(1)–Cl(1)  | 92.03(7)   |
| C(24)–C(25)   | 1.438(6)  | O(4)–Dy(1)–Cl(2)  | 86.63(7)   |
| C(24)–C(29)   | 1.447(6)  | O(4)–Dy(1)–Cl(3)  | 93.91(8)   |
| C(25)–C(26)   | 1.363(6)  | O(4)–Dy(1)–O(7)   | 89.77(12)  |
| C(26)–C(27)   | 1.408(7)  | O(7)–Dy(1)–Cl(1)  | 85.86(10)  |
| C(27)–C(28)   | 1.349(7)  | O(7)–Dy(1)–Cl(2)  | 83.35(9)   |
| C(28)–C(29)   | 1.432(6)  | O(7)–Dy(1)–Cl(3)  | 176.25(9)  |
| C(29)–C(30)   | 1.396(6)  | C(2)–C(1)–P(1)    | 116.1(3)   |
| C(30)–C(31)   | 1.404(6)  | O(1)–P(1)–C(1)    | 111.02(18) |
| C(31)–C(32)   | 1.428(6)  | O(1)–P(1)–O(2)    | 112.88(16) |
| C(31)–C(36)   | 1.441(6)  | O(1)–P(1)–O(3)    | 114.44(16) |
| C(32)–C(33)   | 1.354(7)  | O(2)–P(1)–C(1)    | 111.80(18) |
| C(33)–C(34)   | 1.422(7)  | O(3)–P(1)–C(1)    | 102.65(17) |
| C(34)–C(35)   | 1.355(6)  | O(3)–P(1)–O(2)    | 103.41(15) |
| C(35)–C(36)   | 1.439(6)  | P(1)–O(1)–Dy(1)   | 146.40(17) |
| C(37)–C(38)   | 1.501(7)  | O(5)–P(2)–C(22)   | 110.26(17) |
| C(37)–C(39)   | 1.499(7)  | O(4)–P(2)–O(5)    | 112.36(16) |
| C(40)–C(41)   | 1.499(6)  | O(4)–P(2)–O(6)    | 114.16(15) |
| C(40)–C(42)   | 1.491(7)  | O(4)–P(2)–C(22)   | 112.01(18) |
| O(7)–C(43)    | 1.458(18) | O(6)–P(2)–O(5)    | 104.18(15) |
| O(7)–H(7A)    | 0.88(6)   | O(6)–P(2)–C(22)   | 103.26(16) |
| O(7)–C(43A)   | 1.449(8)  | C(3)–C(2)–C(1)    | 119.1(3)   |
| C(43)–C(44)   | 1.48(2)   | C(3)–C(2)–C(15)   | 120.1(4)   |
| C(43A)–C(44A) | 1.478(13) | C(15)–C(2)–C(1)   | 120.8(3)   |
| O(8)–C(45)    | 1.422(9)  | C(16)–O(2)–P(1)   | 124.6(3)   |
| O(8)–C(45A)   | 1.496(10) | C(19)–O(3)–P(1)   | 124.2(2)   |
| C(45)–C(46)   | 1.478(12) | C(2)–C(3)–C(4)    | 122.2(4)   |
| C(45A)–C(46A) | 1.490(14) | C(2)–C(3)–C(8)    | 120.0(4)   |

|                   |            |                    |           |
|-------------------|------------|--------------------|-----------|
| C(4)–C(3)–C(8)    | 117.8(4)   | C(25)–C(24)–C(29)  | 116.9(4)  |
| C(37)–O(5)–P(2)   | 124.1(3)   | C(26)–C(25)–C(24)  | 121.5(4)  |
| C(4)–C(5)–C(6)    | 120.9(4)   | C(25)–C(26)–C(27)  | 120.7(4)  |
| P(2)–O(4)–Dy(1)   | 159.65(17) | C(28)–C(27)–C(26)  | 120.9(4)  |
| C(5)–C(4)–C(3)    | 121.5(4)   | C(27)–C(28)–C(29)  | 121.0(4)  |
| C(6)–C(7)–C(8)    | 122.0(4)   | C(28)–C(29)–C(24)  | 119.1(4)  |
| C(40)–O(6)–P(2)   | 123.6(2)   | C(30)–C(29)–C(24)  | 117.4(4)  |
| C(7)–C(6)–C(5)    | 119.6(4)   | C(30)–C(29)–C(28)  | 123.5(4)  |
| C(8)–C(9)–Br(1)   | 118.4(3)   | C(29)–C(30)–Br(2)  | 117.8(3)  |
| C(10)–C(9)–Br(1)  | 118.5(3)   | C(29)–C(30)–C(31)  | 123.7(4)  |
| C(10)–C(9)–C(8)   | 123.1(4)   | C(31)–C(30)–Br(2)  | 118.5(3)  |
| C(7)–C(8)–C(3)    | 118.1(4)   | C(30)–C(31)–C(32)  | 123.3(4)  |
| C(9)–C(8)–C(3)    | 118.6(4)   | C(30)–C(31)–C(36)  | 117.7(4)  |
| C(9)–C(8)–C(7)    | 123.3(4)   | C(32)–C(31)–C(36)  | 119.1(4)  |
| C(9)–C(10)–C(11)  | 123.2(4)   | C(33)–C(32)–C(31)  | 121.1(4)  |
| C(9)–C(10)–C(15)  | 118.1(4)   | C(32)–C(33)–C(34)  | 120.6(4)  |
| C(11)–C(10)–C(15) | 118.7(4)   | C(35)–C(34)–C(33)  | 120.2(4)  |
| C(12)–C(11)–C(10) | 121.2(4)   | C(34)–C(35)–C(36)  | 121.8(4)  |
| C(11)–C(12)–C(13) | 120.5(4)   | C(23)–C(36)–C(31)  | 120.5(4)  |
| C(14)–C(13)–C(12) | 120.6(4)   | C(23)–C(36)–C(35)  | 122.2(4)  |
| C(13)–C(14)–C(15) | 121.6(4)   | C(35)–C(36)–C(31)  | 117.2(4)  |
| O(2)–C(16)–C(17)  | 105.9(4)   | O(5)–C(37)–C(38)   | 105.2(4)  |
| O(2)–C(16)–C(18)  | 108.8(4)   | O(5)–C(37)–C(39)   | 108.7(3)  |
| C(17)–C(16)–C(18) | 113.5(4)   | C(39)–C(37)–C(38)  | 113.5(4)  |
| C(2)–C(15)–C(10)  | 120.2(4)   | O(6)–C(40)–C(41)   | 105.5(3)  |
| C(2)–C(15)–C(14)  | 122.5(4)   | O(6)–C(40)–C(42)   | 109.1(4)  |
| C(14)–C(15)–C(10) | 117.3(4)   | C(42)–C(40)–C(41)  | 114.1(4)  |
| O(3)–C(19)–C(20)  | 105.0(3)   | Dy(1)–O(7)–H(7A)   | 120(4)    |
| O(3)–C(19)–C(21)  | 109.1(4)   | C(43)–O(7)–Dy(1)   | 134(2)    |
| C(21)–C(19)–C(20) | 113.3(4)   | C(43)–O(7)–H(7A)   | 104(4)    |
| C(23)–C(22)–P(2)  | 115.9(3)   | C(43A)–O(7)–Dy(1)  | 126.1(9)  |
| C(24)–C(23)–C(22) | 120.4(3)   | O(7)–C(43)–C(44)   | 107(2)    |
| C(24)–C(23)–C(36) | 119.9(4)   | O(7)–C(43A)–C(44A) | 112.3(10) |
| C(36)–C(23)–C(22) | 119.8(4)   | O(8)–C(45)–C(46)   | 112.5(8)  |
| C(23)–C(24)–C(25) | 122.2(4)   | C(46A)–C(45A)–O(8) | 107.7(9)  |
| C(23)–C(24)–C(29) | 120.8(4)   | C(48)–C(47)–O(9)   | 111.3(7)  |

## checkCIF/PLATON report

Structure factors have been supplied for datablock(s) sv0796

THIS REPORT IS FOR GUIDANCE ONLY. IF USED AS PART OF A REVIEW PROCEDURE FOR PUBLICATION, IT SHOULD NOT REPLACE THE EXPERTISE OF AN EXPERIENCED CRYSTALLOGRAPHIC REFEREE.

No syntax errors found.    CIF dictionary    Interpreting this report

---

### Datablock: sv0796

Bond precision:    C-C = 0.0066 A                      Wavelength=1.54186

Cell:              a=11.2192(4)              b=13.3757(4)              c=20.6992(7)  
                    alpha=101.357(3)              beta=98.671(3)              gamma=111.903(2)

Temperature:    100 K

|                | Calculated                                          | Reported                                |
|----------------|-----------------------------------------------------|-----------------------------------------|
| Volume         | 2738.39(18)                                         | 2738.39(17)                             |
| Space group    | P -1                                                | P -1                                    |
| Hall group     | -P 1                                                | -P 1                                    |
| Moiety formula | C44 H54 Br2 Cl3 Dy O7 P2,<br>2(C2 H6 O) [+ solvent] | C44 H54 Br2 Cl3 Dy O7 P2,<br>2(C2 H6 O) |
| Sum formula    | C48 H66 Br2 Cl3 Dy O9 P2<br>[+ solvent]             | C48 H66 Br2 Cl3 Dy O9 P2                |
| Mr             | 1277.60                                             | 1277.61                                 |
| Dx, g cm-3     | 1.549                                               | 1.549                                   |
| Z              | 2                                                   | 2                                       |
| Mu (mm-1)      | 11.311                                              | 11.311                                  |
| F000           | 1286.0                                              | 1286.0                                  |
| F000'          | 1269.90                                             |                                         |
| h,k,lmax       | 13,16,25                                            | 13,16,25                                |
| Nref           | 10614                                               | 10129                                   |
| Tmin,Tmax      | 0.090,0.093                                         | 0.038,0.237                             |
| Tmin'          | 0.025                                               |                                         |

Correction method= # Reported T Limits: Tmin=0.038 Tmax=0.237  
AbsCorr = MULTI-SCAN

Data completeness= 0.954                      Theta(max)= 71.152

R(reflections)= 0.0470( 9981)              wR2(reflections)= 0.1317( 10129)

S = 1.038                                      Npar= 627

---

The following ALERTS were generated. Each ALERT has the format  
**test-name\_ALERT\_alert-type\_alert-level.**  
Click on the hyperlinks for more details of the test.

---

**● Alert level C**

PLAT202\_ALERT\_3\_C Isotropic non-H Atoms in Anion/Solvent ..... 3 Check  
O9 C47 C48  
PLAT234\_ALERT\_4\_C Large Hirshfeld Difference O7 --C43 . 0.24 Ang.  
PLAT243\_ALERT\_4\_C High Solvent Ueq as Compared to Neighbors of 08 Check  
PLAT410\_ALERT\_2\_C Short Intra H...H Contact H1A ..H4 . 1.93 Ang.  
x,y,z = 1\_555 Check  
PLAT410\_ALERT\_2\_C Short Intra H...H Contact H22A ..H35 . 1.95 Ang.  
x,y,z = 1\_555 Check  
PLAT911\_ALERT\_3\_C Missing FCF Refl Between Thmin & STh/L= 0.600 176 Report  
PLAT918\_ALERT\_3\_C Reflection(s) with I(obs) much Smaller I(calc) . 23 Check  
PLAT975\_ALERT\_2\_C Check Calcd Resid. Dens. 0.80A From O1 0.46 eA-3  
PLAT976\_ALERT\_2\_C Check Calcd Resid. Dens. 0.89A From O1 -0.50 eA-3  
PLAT976\_ALERT\_2\_C Check Calcd Resid. Dens. 0.89A From O1 -0.49 eA-3  
PLAT977\_ALERT\_2\_C Check Negative Difference Density on H9 -0.63 eA-3  
PLAT978\_ALERT\_2\_C Number C-C Bonds with Positive Residual Density. 0 Info

---

**● Alert level G**

PLAT002\_ALERT\_2\_G Number of Distance or Angle Restraints on AtSite 12 Note  
PLAT003\_ALERT\_2\_G Number of Uiso or Uij Restrained non-H Atoms ... 4 Report  
PLAT007\_ALERT\_5\_G Number of Unrefined Donor-H Atoms ..... 3 Report  
PLAT172\_ALERT\_4\_G The CIF-Embedded .res File Contains DFIX Records 1 Report  
PLAT175\_ALERT\_4\_G The CIF-Embedded .res File Contains SAME Records 4 Report  
PLAT178\_ALERT\_4\_G The CIF-Embedded .res File Contains SIMU Records 1 Report  
PLAT187\_ALERT\_4\_G The CIF-Embedded .res File Contains RIGU Records 1 Report  
PLAT232\_ALERT\_2\_G Hirshfeld Test Diff (M-X) Dyl --O4 . 5.0 s.u.  
PLAT301\_ALERT\_3\_G Main Residue Disorder .....(Resd 1 ) 3% Note  
PLAT302\_ALERT\_4\_G Anion/Solvent/Minor-Residue Disorder (Resd 2 ) 67% Note  
PLAT398\_ALERT\_2\_G Deviating C-O-C Angle From 120 for O8 43.7 Degree  
PLAT417\_ALERT\_2\_G Short Inter D-H..H-D H8A ..H9 . 1.71 Ang.  
x,y,z = 1\_555 Check  
PLAT417\_ALERT\_2\_G Short Inter D-H..H-D H9 ..H8B . 1.72 Ang.  
x,y,z = 1\_555 Check  
PLAT605\_ALERT\_4\_G Largest Solvent Accessible VOID in the Structure 35 A\*\*3  
PLAT722\_ALERT\_1\_G Angle Calc 111.00, Rep 109.50 Dev... 1.50 Degree  
H44A -C44 -H44C 1.555 1.555 1.555 # 217 Check  
PLAT860\_ALERT\_3\_G Number of Least-Squares Restraints ..... 49 Note  
PLAT868\_ALERT\_4\_G ALERTS Due to the Use of \_smtbx\_masks Suppressed ! Info  
PLAT883\_ALERT\_1\_G No Info/Value for \_atom\_sites\_solution\_primary . Please Do!  
PLAT910\_ALERT\_3\_G Missing # of FCF Reflection(s) Below Theta(Min). 1 Note  
PLAT912\_ALERT\_4\_G Missing # of FCF Reflections Above STh/L= 0.600 308 Note



## 2.12 Complex 20

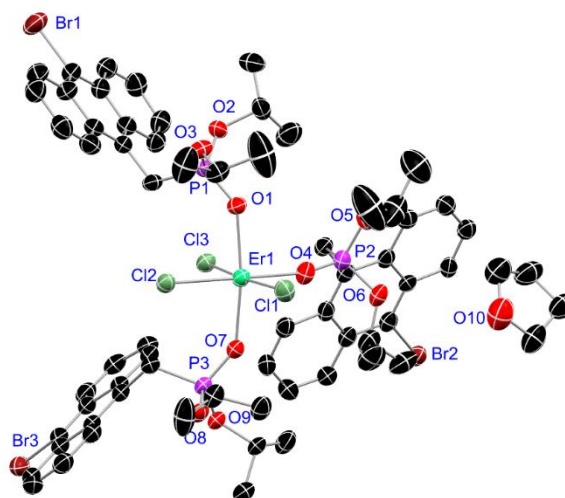

Figure 51: Asymmetric unit of **20**.

**20** crystallizes as  $C_{63}H_{72}Br_3Cl_3ErO_9P_3 \cdot THF$  in the space group  $P2_1/c$ . The asymmetric unit contains one monomer and a co-crystallized THF lattice molecule. High residual electron densities located close to very heavy atoms (here Er or Br) can be expected due to minor crystal quality, therefore causing a B-Alert upon cif-file check.

Bond lengths [Å] and angles [°] of **20**

|             |            |             |           |
|-------------|------------|-------------|-----------|
| Er(1)–O(1)  | 2.234(4)   | O(2)–C(16)  | 1.468(7)  |
| Er(1)–Cl(1) | 2.5746(14) | Br(3)–C(51) | 1.913(6)  |
| Er(1)–Cl(2) | 2.6270(12) | P(3)–O(7)   | 1.504(4)  |
| Er(1)–Cl(3) | 2.6472(13) | P(3)–O(9)   | 1.561(4)  |
| Er(1)–O(4)  | 2.220(4)   | P(3)–C(43)  | 1.798(6)  |
| Er(1)–O(7)  | 2.235(4)   | P(3)–O(8)   | 1.562(4)  |
| P(1)–C(1)   | 1.792(6)   | C(3)–C(4)   | 1.420(9)  |
| P(1)–O(1)   | 1.493(4)   | C(3)–C(8)   | 1.440(8)  |
| P(1)–O(2)   | 1.551(4)   | O(3)–C(19)  | 1.484(7)  |
| P(1)–O(3)   | 1.559(4)   | C(4)–C(5)   | 1.359(9)  |
| C(1)–C(2)   | 1.520(7)   | C(7)–C(6)   | 1.350(11) |
| Br(1)–C(9)  | 1.914(6)   | C(7)–C(8)   | 1.429(9)  |
| Br(2)–C(30) | 1.902(5)   | O(6)–C(40)  | 1.465(9)  |
| P(2)–O(4)   | 1.482(4)   | C(6)–C(5)   | 1.420(11) |
| P(2)–O(6)   | 1.557(4)   | O(5)–C(37)  | 1.460(9)  |
| P(2)–O(5)   | 1.563(5)   | C(9)–C(10)  | 1.392(9)  |
| P(2)–C(22)  | 1.791(6)   | C(9)–C(8)   | 1.405(9)  |
| C(2)–C(3)   | 1.408(8)   | O(9)–C(58)  | 1.486(6)  |
| C(2)–C(15)  | 1.409(8)   | O(10)–C(64) | 1.457(12) |

|             |           |                   |            |
|-------------|-----------|-------------------|------------|
| O(10)–C(67) | 1.420(10) | C(48)–C(49)       | 1.363(10)  |
| C(10)–C(11) | 1.437(9)  | C(49)–C(50)       | 1.436(9)   |
| C(10)–C(15) | 1.424(8)  | C(50)–C(51)       | 1.396(9)   |
| C(11)–C(12) | 1.362(10) | C(51)–C(52)       | 1.370(10)  |
| C(12)–C(13) | 1.415(9)  | C(52)–C(53)       | 1.427(9)   |
| C(13)–C(14) | 1.348(9)  | C(52)–C(57)       | 1.467(9)   |
| C(14)–C(15) | 1.435(8)  | C(53)–C(54)       | 1.354(11)  |
| C(16)–C(17) | 1.508(9)  | C(54)–C(55)       | 1.409(11)  |
| C(16)–C(18) | 1.515(11) | C(55)–C(56)       | 1.373(9)   |
| C(19)–C(20) | 1.490(12) | C(56)–C(57)       | 1.419(9)   |
| C(19)–C(21) | 1.476(10) | C(58)–C(59)       | 1.501(9)   |
| C(22)–C(23) | 1.519(7)  | C(58)–C(60)       | 1.497(9)   |
| C(24)–C(23) | 1.397(8)  | C(61)–C(62)       | 1.495(10)  |
| C(24)–C(25) | 1.438(8)  | C(61)–C(63)       | 1.498(9)   |
| C(24)–C(29) | 1.459(8)  | C(61)–O(8)        | 1.481(8)   |
| C(23)–C(36) | 1.413(7)  | C(64)–C(65)       | 1.484(14)  |
| C(25)–C(26) | 1.369(9)  | C(65)–C(66)       | 1.512(11)  |
| C(26)–C(27) | 1.403(9)  | C(66)–C(67)       | 1.494(13)  |
| C(27)–C(28) | 1.351(9)  |                   |            |
| C(28)–C(29) | 1.414(8)  | O(1)–Er(1)–Cl(1)  | 94.49(10)  |
| C(29)–C(30) | 1.417(8)  | O(1)–Er(1)–Cl(2)  | 87.25(10)  |
| C(30)–C(31) | 1.383(8)  | O(1)–Er(1)–Cl(3)  | 84.99(10)  |
| C(31)–C(32) | 1.442(7)  | O(1)–Er(1)–O(7)   | 170.83(14) |
| C(31)–C(36) | 1.433(7)  | Cl(1)–Er(1)–Cl(2) | 92.22(4)   |
| C(32)–C(33) | 1.358(8)  | Cl(1)–Er(1)–Cl(3) | 172.79(4)  |
| C(33)–C(34) | 1.413(8)  | Cl(2)–Er(1)–Cl(3) | 94.93(4)   |
| C(34)–C(35) | 1.353(8)  | O(4)–Er(1)–O(1)   | 92.13(15)  |
| C(35)–C(36) | 1.439(8)  | O(4)–Er(1)–Cl(1)  | 87.00(11)  |
| C(37)–C(38) | 1.546(16) | O(4)–Er(1)–Cl(2)  | 178.96(11) |
| C(37)–C(39) | 1.396(16) | O(4)–Er(1)–Cl(3)  | 85.84(10)  |
| C(40)–C(41) | 1.518(10) | O(4)–Er(1)–O(7)   | 92.21(15)  |
| C(40)–C(42) | 1.501(10) | O(7)–Er(1)–Cl(1)  | 93.80(10)  |
| C(43)–C(44) | 1.522(8)  | O(7)–Er(1)–Cl(2)  | 88.53(10)  |
| C(44)–C(45) | 1.403(8)  | O(7)–Er(1)–Cl(3)  | 87.28(10)  |
| C(44)–C(57) | 1.405(8)  | O(1)–P(1)–C(1)    | 113.4(2)   |
| C(45)–C(46) | 1.423(8)  | O(1)–P(1)–O(2)    | 114.4(2)   |
| C(45)–C(50) | 1.448(8)  | O(1)–P(1)–O(3)    | 111.1(2)   |
| C(46)–C(47) | 1.378(9)  | O(2)–P(1)–C(1)    | 101.7(2)   |
| C(47)–C(48) | 1.393(10) | O(2)–P(1)–O(3)    | 105.9(2)   |

|                   |          |                   |          |
|-------------------|----------|-------------------|----------|
| O(3)–P(1)–C(1)    | 109.7(3) | C(12)–C(11)–C(10) | 121.1(6) |
| C(2)–C(1)–P(1)    | 115.7(4) | C(11)–C(12)–C(13) | 119.8(6) |
| P(1)–O(1)–Er(1)   | 142.5(2) | C(14)–C(13)–C(12) | 120.7(6) |
| O(4)–P(2)–O(6)    | 112.6(2) | C(13)–C(14)–C(15) | 122.1(6) |
| O(4)–P(2)–O(5)    | 114.8(2) | O(2)–C(16)–C(17)  | 105.4(5) |
| O(4)–P(2)–C(22)   | 111.3(2) | O(2)–C(16)–C(18)  | 108.8(6) |
| O(6)–P(2)–O(5)    | 104.3(2) | C(17)–C(16)–C(18) | 113.3(5) |
| O(6)–P(2)–C(22)   | 110.6(2) | C(2)–C(15)–C(10)  | 120.1(5) |
| O(5)–P(2)–C(22)   | 102.7(3) | C(2)–C(15)–C(14)  | 122.6(5) |
| C(3)–C(2)–C(1)    | 119.3(5) | C(10)–C(15)–C(14) | 117.3(5) |
| C(3)–C(2)–C(15)   | 120.7(5) | O(3)–C(19)–C(20)  | 108.6(6) |
| C(15)–C(2)–C(1)   | 120.0(5) | C(21)–C(19)–O(3)  | 107.7(6) |
| C(16)–O(2)–P(1)   | 127.4(4) | C(21)–C(19)–C(20) | 114.4(8) |
| O(7)–P(3)–O(9)    | 113.4(2) | C(23)–C(22)–P(2)  | 114.5(4) |
| O(7)–P(3)–C(43)   | 110.8(2) | C(23)–C(24)–C(25) | 123.4(5) |
| O(7)–P(3)–O(8)    | 111.3(2) | C(23)–C(24)–C(29) | 120.0(5) |
| O(9)–P(3)–C(43)   | 106.9(2) | C(25)–C(24)–C(29) | 116.6(5) |
| O(9)–P(3)–O(8)    | 104.4(2) | C(24)–C(23)–C(22) | 119.7(5) |
| O(8)–P(3)–C(43)   | 109.8(2) | C(24)–C(23)–C(36) | 120.7(5) |
| C(2)–C(3)–C(4)    | 123.0(6) | C(36)–C(23)–C(22) | 119.6(5) |
| C(2)–C(3)–C(8)    | 119.6(5) | C(26)–C(25)–C(24) | 121.9(5) |
| C(4)–C(3)–C(8)    | 117.4(5) | C(25)–C(26)–C(27) | 120.4(5) |
| C(19)–O(3)–P(1)   | 123.7(4) | C(28)–C(27)–C(26) | 120.3(6) |
| P(2)–O(4)–Er(1)   | 165.0(3) | C(27)–C(28)–C(29) | 122.3(6) |
| C(5)–C(4)–C(3)    | 122.4(6) | C(28)–C(29)–C(24) | 118.5(5) |
| C(6)–C(7)–C(8)    | 121.5(6) | C(28)–C(29)–C(30) | 124.3(5) |
| P(3)–O(7)–Er(1)   | 142.9(2) | C(30)–C(29)–C(24) | 117.2(5) |
| C(40)–O(6)–P(2)   | 122.2(4) | C(29)–C(30)–Br(2) | 117.3(4) |
| C(7)–C(6)–C(5)    | 120.3(6) | C(31)–C(30)–Br(2) | 119.3(4) |
| C(37)–O(5)–P(2)   | 127.3(6) | C(31)–C(30)–C(29) | 123.3(5) |
| C(4)–C(5)–C(6)    | 119.8(6) | C(30)–C(31)–C(32) | 123.0(5) |
| C(10)–C(9)–Br(1)  | 119.1(5) | C(30)–C(31)–C(36) | 118.5(5) |
| C(10)–C(9)–C(8)   | 122.9(6) | C(36)–C(31)–C(32) | 118.4(5) |
| C(8)–C(9)–Br(1)   | 118.0(4) | C(33)–C(32)–C(31) | 121.4(5) |
| C(58)–O(9)–P(3)   | 117.3(3) | C(32)–C(33)–C(34) | 120.2(5) |
| C(67)–O(10)–C(64) | 109.6(7) | C(35)–C(34)–C(33) | 120.4(6) |
| C(9)–C(10)–C(11)  | 122.3(6) | C(34)–C(35)–C(36) | 122.0(5) |
| C(9)–C(10)–C(15)  | 118.6(6) | C(23)–C(36)–C(31) | 120.2(5) |
| C(15)–C(10)–C(11) | 119.0(6) | C(23)–C(36)–C(35) | 122.3(5) |

|                   |           |                   |          |
|-------------------|-----------|-------------------|----------|
| C(31)–C(36)–C(35) | 117.5(5)  | C(51)–C(52)–C(57) | 118.4(5) |
| O(5)–C(37)–C(38)  | 102.9(9)  | C(53)–C(52)–C(57) | 117.5(6) |
| C(39)–C(37)–O(5)  | 113.0(8)  | C(54)–C(53)–C(52) | 122.2(7) |
| C(39)–C(37)–C(38) | 108.1(10) | C(53)–C(54)–C(55) | 120.3(6) |
| O(6)–C(40)–C(41)  | 104.7(6)  | C(56)–C(55)–C(54) | 120.6(7) |
| O(6)–C(40)–C(42)  | 109.3(6)  | C(55)–C(56)–C(57) | 121.4(6) |
| C(42)–C(40)–C(41) | 113.6(6)  | C(44)–C(57)–C(52) | 119.4(6) |
| C(44)–C(43)–P(3)  | 119.8(4)  | C(44)–C(57)–C(56) | 122.6(6) |
| C(45)–C(44)–C(43) | 118.6(5)  | C(56)–C(57)–C(52) | 118.0(5) |
| C(45)–C(44)–C(57) | 120.6(5)  | O(9)–C(58)–C(59)  | 107.4(5) |
| C(57)–C(44)–C(43) | 120.5(5)  | O(9)–C(58)–C(60)  | 108.0(5) |
| C(44)–C(45)–C(46) | 122.2(5)  | C(60)–C(58)–C(59) | 114.2(5) |
| C(44)–C(45)–C(50) | 119.8(5)  | C(62)–C(61)–C(63) | 112.7(6) |
| C(46)–C(45)–C(50) | 118.0(5)  | O(8)–C(61)–C(62)  | 105.7(6) |
| C(47)–C(46)–C(45) | 121.6(6)  | O(8)–C(61)–C(63)  | 108.7(5) |
| C(46)–C(47)–C(48) | 120.5(6)  | O(10)–C(64)–C(65) | 104.7(7) |
| C(49)–C(48)–C(47) | 120.1(6)  | C(64)–C(65)–C(66) | 103.4(7) |
| C(48)–C(49)–C(50) | 122.3(6)  | C(67)–C(66)–C(65) | 100.9(7) |
| C(49)–C(50)–C(45) | 117.3(5)  | O(10)–C(67)–C(66) | 105.4(7) |
| C(51)–C(50)–C(45) | 118.3(6)  | C(61)–O(8)–P(3)   | 123.5(4) |
| C(51)–C(50)–C(49) | 124.4(6)  | C(7)–C(8)–C(3)    | 118.6(6) |
| C(50)–C(51)–Br(3) | 117.3(5)  | C(9)–C(8)–C(3)    | 118.1(5) |
| C(52)–C(51)–Br(3) | 119.1(5)  | C(9)–C(8)–C(7)    | 123.3(6) |
| C(52)–C(51)–C(50) | 123.5(6)  |                   |          |
| C(51)–C(52)–C(53) | 124.1(6)  |                   |          |

### ***checkCIF/PLATON report***

*Structure factors have been supplied for datablock(s) sv0773*

***THIS REPORT IS FOR GUIDANCE ONLY. IF USED AS PART OF A REVIEW PROCEDURE FOR PUBLICATION, IT SHOULD NOT REPLACE THE EXPERTISE OF AN EXPERIENCED CRYSTALLOGRAPHIC REFEREE.***

*No syntax errors found.      CIF dictionary      Interpreting this report*

### ***Datablock: sv0773***

*Bond precision:    C–C = 0.0100 Å*

*Wavelength=1.54186*

*Cell:                    a=21.3578(6)*

*b=16.3493(6)*

*c=22.3921(6)*

*alpha=90*

*beta=115.243(2)*

*gamma=90*

*Temperature:        100 K*

|                | Calculated                           | Reported                             |
|----------------|--------------------------------------|--------------------------------------|
| Volume         | 7072.3(4)                            | 7072.3(4)                            |
| Space group    | P 21/c                               | P 1 21/c 1                           |
| Hall group     | -P 2ybc                              | -P 2ybc                              |
| Moiety formula | C63 H72 Br3 Cl3 Er O9 P3,<br>C4 H8 O | C63 H72 Br3 Cl3 Er O9 P3,<br>C4 H8 O |
| Sum formula    | C67 H80 Br3 Cl3 Er O10 P3            | C67 H80 Br3 Cl3 Er O10 P3            |
| Mr             | 1651.53                              | 1651.56                              |
| Dx,g cm-3      | 1.551                                | 1.551                                |
| Z              | 4                                    | 4                                    |
| Mu (mm-1)      | 6.311                                | 6.311                                |
| F000           | 3324.0                               | 3324.0                               |
| F000'          | 3292.75                              |                                      |
| h,k,lmax       | 26,19,27                             | 25,19,26                             |
| Nref           | 13399                                | 12928                                |
| Tmin,Tmax      | 0.361,0.881                          | 0.105,0.743                          |
| Tmin'          | 0.108                                |                                      |

Correction method= # Reported T Limits: Tmin=0.105 Tmax=0.743  
AbsCorr = MULTI-SCAN

Data completeness= 0.965                      Theta(max)= 69.984

R(reflections)= 0.0661( 10927)              wR2(reflections)= 0.1915( 12928)

S = 1.038                                      Npar= 796

The following ALERTS were generated. Each ALERT has the format

**test-name\_ALERT\_alert-type\_alert-level.**

Click on the hyperlinks for more details of the test.

---

### ● Alert level B

|                   |                          |       |          |           |
|-------------------|--------------------------|-------|----------|-----------|
| PLAT971_ALERT_2_B | Check Calcd Resid. Dens. | 1.11A | From Erl | 3.22 eA-3 |
| PLAT971_ALERT_2_B | Check Calcd Resid. Dens. | 1.06A | From Erl | 3.02 eA-3 |

---

### ● Alert level C

|                   |                                                |                     |         |       |         |        |
|-------------------|------------------------------------------------|---------------------|---------|-------|---------|--------|
| PLAT029_ALERT_3_C | _diffn_measured_fraction_theta_full            | value               | Low     | .     | 0.976   | Why?   |
| PLAT094_ALERT_2_C | Ratio of Maximum / Minimum Residual Density    | ....                |         |       | 2.11    | Report |
| PLAT220_ALERT_2_C | NonSolvent Resd 1 C                            | Ueq(max) / Ueq(min) | Range   |       | 4.0     | Ratio  |
| PLAT222_ALERT_3_C | NonSolvent Resd 1 H                            | Uiso(max)/Uiso(min) | Range   |       | 4.1     | Ratio  |
| PLAT234_ALERT_4_C | Large Hirshfeld Difference                     | C37                 | --C38   | .     | 0.22    | Ang.   |
| PLAT242_ALERT_2_C | Low MainMol Ueq as Compared to Neighbors of    |                     |         | C19   |         | Check  |
| PLAT342_ALERT_3_C | Low Bond Precision on C-C Bonds                | .....               |         |       | 0.01005 | Ang.   |
| PLAT360_ALERT_2_C | Short C(sp3)-C(sp3) Bond                       | C37                 | - C39   | .     | 1.39    | Ang.   |
| PLAT410_ALERT_2_C | Short Intra H...H Contact                      | H1B                 | ..H4    | .     | 1.97    | Ang.   |
|                   |                                                |                     | x,y,z = | 1_555 |         | Check  |
| PLAT410_ALERT_2_C | Short Intra H...H Contact                      | H22A                | ..H25   | .     | 1.98    | Ang.   |
|                   |                                                |                     | x,y,z = | 1_555 |         | Check  |
| PLAT410_ALERT_2_C | Short Intra H...H Contact                      | H43B                | ..H46   | .     | 1.97    | Ang.   |
|                   |                                                |                     | x,y,z = | 1_555 |         | Check  |
| PLAT911_ALERT_3_C | Missing FCF Refl Between Thmin & STh/L=        | 0.600               |         |       | 310     | Report |
| PLAT918_ALERT_3_C | Reflection(s) with I(obs) much Smaller I(calc) | .                   |         |       | 1       | Check  |

|                   |                                                  |       |          |            |
|-------------------|--------------------------------------------------|-------|----------|------------|
| PLAT971_ALERT_2_C | Check Calcd Resid. Dens.                         | 1.06A | From Er1 | 1.67 eA-3  |
| PLAT971_ALERT_2_C | Check Calcd Resid. Dens.                         | 1.15A | From Br2 | 1.66 eA-3  |
| PLAT971_ALERT_2_C | Check Calcd Resid. Dens.                         | 1.14A | From Er1 | 1.59 eA-3  |
| PLAT971_ALERT_2_C | Check Calcd Resid. Dens.                         | 1.13A | From Br2 | 1.57 eA-3  |
| PLAT971_ALERT_2_C | Check Calcd Resid. Dens.                         | 0.81A | From Br3 | 1.54 eA-3  |
| PLAT973_ALERT_2_C | Check Calcd Positive Resid. Density on           |       | Er1      | 1.24 eA-3  |
| PLAT977_ALERT_2_C | Check Negative Difference Density on             | H38A  |          | -0.32 eA-3 |
| PLAT978_ALERT_2_C | Number C-C Bonds with Positive Residual Density. |       |          | 0 Info     |

---

**Alert level G**

|                   |                                                  |  |  |              |
|-------------------|--------------------------------------------------|--|--|--------------|
| PLAT072_ALERT_2_G | SHELXL First Parameter in WGHT Unusually Large   |  |  | 0.13 Report  |
| PLAT083_ALERT_2_G | SHELXL Second Parameter in WGHT Unusually Large  |  |  | 11.95 Why ?  |
| PLAT398_ALERT_2_G | Deviating C-O-C Angle From 120 for O10           |  |  | 109.7 Degree |
| PLAT432_ALERT_2_G | Short Inter X...Y Contact Br3 ..C12              |  |  | 3.31 Ang.    |
|                   | 1-x,1-y,1-z =                                    |  |  | 3_666 Check  |
| PLAT790_ALERT_4_G | Centre of Gravity not Within Unit Cell: Resd. #  |  |  | 2 Note       |
|                   | C4 H8 O                                          |  |  |              |
| PLAT794_ALERT_5_G | Tentative Bond Valency for Er1 (III)             |  |  | 3.19 Info    |
| PLAT883_ALERT_1_G | No Info/Value for _atom_sites_solution_primary   |  |  | Please Do !  |
| PLAT912_ALERT_4_G | Missing # of FCF Reflections Above STh/L= 0.600  |  |  | 148 Note     |
| PLAT933_ALERT_2_G | Number of OMIT Records in Embedded .res File ... |  |  | 6 Note       |
| PLAT960_ALERT_3_G | Number of Intensities with I < - 2*sig(I) ...    |  |  | 33 Check     |

## 2.13 Complex 31

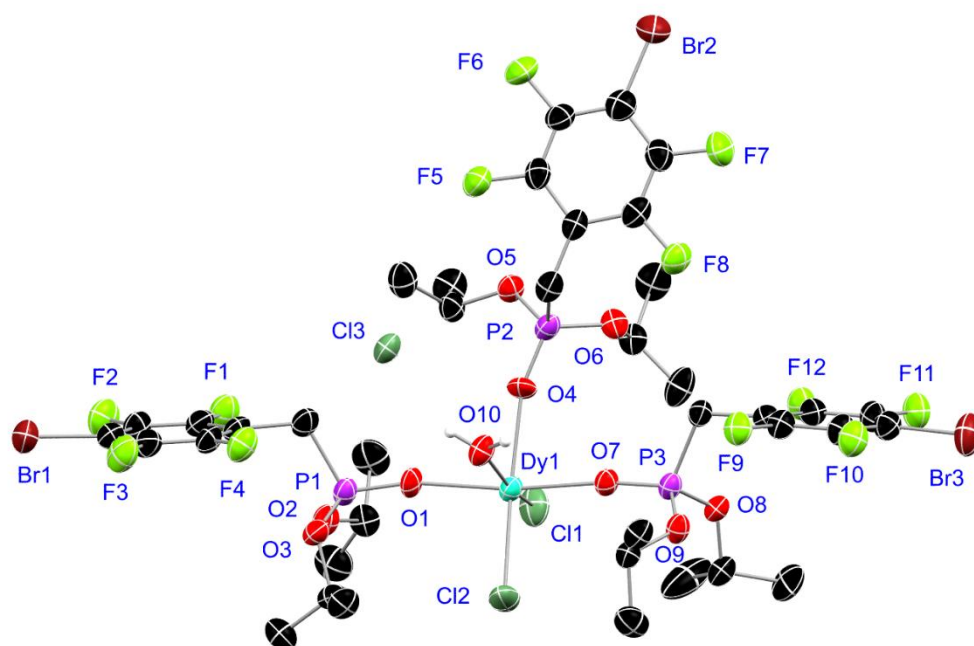

Figure 52: Asymmetric unit of **31**.

**31** crystallizes as  $C_{39}H_{50}Br_3Cl_2DyF_{12}O_{10}P_3 \cdot Cl^-$  in the space group  $P\bar{1}$  and contains one molecule in the asymmetric unit. A  $H_2O$  ligand replaces one of the chloride anions causing the formation of a partially solvent separated ion pair.

Bond lengths [Å] and angles [°] of **31**

|             |           |             |           |
|-------------|-----------|-------------|-----------|
| C(1)–C(2)   | 1.512(12) | Br(2)–C(18) | 1.861(11) |
| C(1)–P(1)   | 1.775(9)  | O(2)–C(8)   | 1.490(11) |
| F(1)–C(3)   | 1.354(11) | P(2)–O(4)   | 1.465(6)  |
| Br(1)–C(5)  | 1.888(10) | P(2)–O(6)   | 1.548(6)  |
| O(1)–P(1)   | 1.479(6)  | P(2)–O(5)   | 1.564(6)  |
| O(1)–Dy(1)  | 2.251(5)  | P(2)–C(14)  | 1.783(9)  |
| P(1)–O(3)   | 1.544(6)  | C(3)–C(4)   | 1.382(13) |
| P(1)–O(2)   | 1.555(7)  | F(3)–C(6)   | 1.336(11) |
| Cl(1)–Dy(1) | 2.587(3)  | Br(3)–C(31) | 1.864(9)  |
| Dy(1)–O(7)  | 2.253(6)  | O(3)–C(11)  | 1.472(10) |
| Dy(1)–O(4)  | 2.265(6)  | P(3)–O(7)   | 1.487(6)  |
| Dy(1)–O(10) | 2.331(7)  | P(3)–O(9)   | 1.548(6)  |
| Dy(1)–Cl(2) | 2.561(2)  | P(3)–O(8)   | 1.550(6)  |
| C(2)–C(3)   | 1.363(13) | P(3)–C(27)  | 1.781(9)  |
| C(2)–C(7)   | 1.372(13) | C(4)–C(5)   | 1.349(14) |
| F(2)–C(4)   | 1.331(10) | F(4)–C(7)   | 1.344(10) |

|             |           |                   |            |
|-------------|-----------|-------------------|------------|
| C(5)–C(6)   | 1.382(14) | C(34)–C(36)       | 1.491(14)  |
| F(5)–C(16)  | 1.345(10) | C(37)–C(38)       | 1.487(13)  |
| O(5)–C(21)  | 1.458(10) | C(37)–C(39)       | 1.487(12)  |
| C(6)–C(7)   | 1.371(13) |                   |            |
| F(6)–C(17)  | 1.344(10) | C(2)–C(1)–P(1)    | 115.1(7)   |
| O(6)–C(24)  | 1.480(10) | P(1)–O(1)–Dy(1)   | 165.8(4)   |
| F(7)–C(19)  | 1.356(11) | O(1)–P(1)–O(3)    | 115.2(4)   |
| C(8)–C(10)  | 1.489(14) | O(1)–P(1)–O(2)    | 113.4(4)   |
| C(8)–C(9)   | 1.501(15) | O(3)–P(1)–O(2)    | 105.4(4)   |
| F(8)–C(20)  | 1.359(10) | O(1)–P(1)–C(1)    | 111.2(4)   |
| O(8)–C(34)  | 1.466(11) | O(3)–P(1)–C(1)    | 101.9(4)   |
| F(9)–C(29)  | 1.341(10) | O(2)–P(1)–C(1)    | 108.9(4)   |
| O(9)–C(37)  | 1.489(11) | O(1)–Dy(1)–O(7)   | 169.6(2)   |
| F(10)–C(30) | 1.336(10) | O(1)–Dy(1)–O(4)   | 90.3(2)    |
| O(10)–H(10) | 0.83(11)  | O(7)–Dy(1)–O(4)   | 83.9(2)    |
| O(10)–H(20) | 0.81(9)   | O(1)–Dy(1)–O(10)  | 84.9(2)    |
| F(11)–C(32) | 1.341(10) | O(7)–Dy(1)–O(10)  | 85.6(2)    |
| C(11)–C(12) | 1.491(13) | O(4)–Dy(1)–O(10)  | 79.8(2)    |
| C(11)–C(13) | 1.507(13) | O(1)–Dy(1)–Cl(2)  | 94.63(17)  |
| F(12)–C(33) | 1.342(10) | O(7)–Dy(1)–Cl(2)  | 89.85(16)  |
| C(14)–C(15) | 1.474(13) | O(4)–Dy(1)–Cl(2)  | 169.89(18) |
| C(15)–C(20) | 1.381(13) | O(10)–Dy(1)–Cl(2) | 91.78(19)  |
| C(15)–C(16) | 1.398(13) | O(1)–Dy(1)–Cl(1)  | 89.04(17)  |
| C(16)–C(17) | 1.359(14) | O(7)–Dy(1)–Cl(1)  | 99.31(16)  |
| C(17)–C(18) | 1.370(14) | O(4)–Dy(1)–Cl(1)  | 87.85(18)  |
| C(18)–C(19) | 1.394(14) | O(10)–Dy(1)–Cl(1) | 166.23(18) |
| C(19)–C(20) | 1.371(14) | Cl(2)–Dy(1)–Cl(1) | 101.05(10) |
| C(21)–C(22) | 1.505(13) | C(3)–C(2)–C(7)    | 116.6(8)   |
| C(21)–C(23) | 1.512(13) | C(3)–C(2)–C(1)    | 122.6(9)   |
| C(27)–C(28) | 1.521(12) | C(7)–C(2)–C(1)    | 120.8(8)   |
| C(26)–C(24) | 1.492(14) | C(8)–O(2)–P(1)    | 123.9(6)   |
| C(25)–C(24) | 1.466(13) | O(4)–P(2)–O(6)    | 115.6(4)   |
| C(28)–C(29) | 1.356(13) | O(4)–P(2)–O(5)    | 111.2(4)   |
| C(28)–C(33) | 1.376(13) | O(6)–P(2)–O(5)    | 105.5(3)   |
| C(29)–C(30) | 1.380(12) | O(4)–P(2)–C(14)   | 112.9(4)   |
| C(30)–C(31) | 1.388(13) | O(6)–P(2)–C(14)   | 102.6(4)   |
| C(31)–C(32) | 1.369(13) | O(5)–P(2)–C(14)   | 108.4(4)   |
| C(32)–C(33) | 1.390(13) | F(1)–C(3)–C(2)    | 120.1(8)   |
| C(34)–C(35) | 1.449(15) | F(1)–C(3)–C(4)    | 117.4(8)   |



|                   |          |                   |           |
|-------------------|----------|-------------------|-----------|
| C(2)–C(3)–C(4)    | 122.5(9) | F(5)–C(16)–C(17)  | 118.7(8)  |
| C(11)–O(3)–P(1)   | 123.9(5) | F(5)–C(16)–C(15)  | 118.4(9)  |
| O(7)–P(3)–O(9)    | 113.4(3) | C(17)–C(16)–C(15) | 122.9(9)  |
| O(7)–P(3)–O(8)    | 114.7(3) | F(6)–C(17)–C(16)  | 119.3(9)  |
| O(9)–P(3)–O(8)    | 105.7(3) | F(6)–C(17)–C(18)  | 118.2(9)  |
| O(7)–P(3)–C(27)   | 112.1(4) | C(16)–C(17)–C(18) | 122.5(9)  |
| O(9)–P(3)–C(27)   | 108.6(4) | C(17)–C(18)–C(19) | 115.7(10) |
| O(8)–P(3)–C(27)   | 101.6(4) | C(17)–C(18)–Br(2) | 123.8(8)  |
| F(2)–C(4)–C(5)    | 120.5(9) | C(19)–C(18)–Br(2) | 120.5(8)  |
| F(2)–C(4)–C(3)    | 119.5(9) | F(7)–C(19)–C(20)  | 118.3(9)  |
| C(5)–C(4)–C(3)    | 119.9(9) | F(7)–C(19)–C(18)  | 120.3(10) |
| P(2)–O(4)–Dy(1)   | 163.2(4) | C(20)–C(19)–C(18) | 121.4(9)  |
| C(4)–C(5)–C(6)    | 118.9(9) | F(8)–C(20)–C(19)  | 118.1(9)  |
| C(4)–C(5)–Br(1)   | 121.4(7) | F(8)–C(20)–C(15)  | 118.7(9)  |
| C(6)–C(5)–Br(1)   | 119.7(7) | C(19)–C(20)–C(15) | 123.2(9)  |
| C(21)–O(5)–P(2)   | 123.0(6) | O(5)–C(21)–C(22)  | 106.9(8)  |
| F(3)–C(6)–C(7)    | 118.8(9) | O(5)–C(21)–C(23)  | 108.5(8)  |
| F(3)–C(6)–C(5)    | 121.1(9) | C(22)–C(21)–C(23) | 113.8(8)  |
| C(7)–C(6)–C(5)    | 120.1(9) | C(28)–C(27)–P(3)  | 112.7(6)  |
| C(24)–O(6)–P(2)   | 122.7(6) | C(25)–C(24)–O(6)  | 107.8(8)  |
| F(4)–C(7)–C(6)    | 118.1(9) | C(25)–C(24)–C(26) | 115.2(9)  |
| F(4)–C(7)–C(2)    | 119.9(8) | O(6)–C(24)–C(26)  | 106.5(8)  |
| C(6)–C(7)–C(2)    | 121.9(9) | C(29)–C(28)–C(33) | 117.2(8)  |
| P(3)–O(7)–Dy(1)   | 172.9(4) | C(29)–C(28)–C(27) | 122.4(8)  |
| C(10)–C(8)–O(2)   | 110.8(8) | C(33)–C(28)–C(27) | 120.3(8)  |
| C(10)–C(8)–C(9)   | 112.8(9) | F(9)–C(29)–C(28)  | 120.2(8)  |
| O(2)–C(8)–C(9)    | 105.2(8) | F(9)–C(29)–C(30)  | 117.1(8)  |
| C(34)–O(8)–P(3)   | 125.2(6) | C(28)–C(29)–C(30) | 122.7(9)  |
| C(37)–O(9)–P(3)   | 126.6(5) | F(10)–C(30)–C(29) | 120.0(8)  |
| Dy(1)–O(10)–H(10) | 125(7)   | F(10)–C(30)–C(31) | 120.3(8)  |
| Dy(1)–O(10)–H(20) | 114(6)   | C(29)–C(30)–C(31) | 119.8(9)  |
| H(10)–O(10)–H(20) | 116(9)   | C(32)–C(31)–C(30) | 118.4(9)  |
| O(3)–C(11)–C(12)  | 107.9(8) | C(32)–C(31)–Br(3) | 121.3(7)  |
| O(3)–C(11)–C(13)  | 105.2(7) | C(30)–C(31)–Br(3) | 120.3(7)  |
| C(12)–C(11)–C(13) | 114.1(8) | F(11)–C(32)–C(31) | 120.8(9)  |
| C(15)–C(14)–P(2)  | 112.2(6) | F(11)–C(32)–C(33) | 118.7(9)  |
| C(20)–C(15)–C(16) | 114.1(9) | C(31)–C(32)–C(33) | 120.4(9)  |
| C(20)–C(15)–C(14) | 123.8(8) | F(12)–C(33)–C(28) | 121.1(8)  |
| C(16)–C(15)–C(14) | 122.0(8) | F(12)–C(33)–C(32) | 117.4(8)  |

|                   |           |                   |          |
|-------------------|-----------|-------------------|----------|
| C(28)–C(33)–C(32) | 121.5(9)  | C(38)–C(37)–C(39) | 113.7(8) |
| C(35)–C(34)–O(8)  | 109.8(8)  | C(38)–C(37)–O(9)  | 106.9(7) |
| C(35)–C(34)–C(36) | 113.6(11) | C(39)–C(37)–O(9)  | 106.9(7) |
| O(8)–C(34)–C(36)  | 106.3(8)  |                   |          |

## ***checkCIF/PLATON report***

Structure factors have been supplied for datablock(s) i3070

THIS REPORT IS FOR GUIDANCE ONLY. IF USED AS PART OF A REVIEW PROCEDURE FOR PUBLICATION, IT SHOULD NOT REPLACE THE EXPERTISE OF AN EXPERIENCED CRYSTALLOGRAPHIC REFEREE.

No syntax errors found. CIF dictionary Interpreting this report

### ***Datablock: i3070***

|                 |                  |                    |                 |
|-----------------|------------------|--------------------|-----------------|
| Bond precision: | C-C = 0.0149 Å   | Wavelength=0.71073 |                 |
| Cell:           | a=13.4866(11)    | b=14.6216(17)      | c=16.3342(12)   |
|                 | alpha=110.663(7) | beta=110.117(6)    | gamma=91.210(8) |
| Temperature:    | 100 K            |                    |                 |

|                                     | Calculated                                                                                                                             | Reported                                                                                           |
|-------------------------------------|----------------------------------------------------------------------------------------------------------------------------------------|----------------------------------------------------------------------------------------------------|
| Volume                              | 2792.5(5)                                                                                                                              | 2792.5(5)                                                                                          |
| Space group                         | P -1                                                                                                                                   | P -1                                                                                               |
| Hall group                          | -P 1                                                                                                                                   | -P 1                                                                                               |
| Moiety formula                      | C <sub>39</sub> H <sub>50</sub> Br <sub>3</sub> Cl <sub>2</sub> Dy F <sub>12</sub> O <sub>10</sub> <sub>?</sub><br>P <sub>3</sub> , Cl |                                                                                                    |
| Sum formula                         | C <sub>39</sub> H <sub>50</sub> Br <sub>3</sub> Cl <sub>3</sub> Dy F <sub>12</sub> O <sub>10</sub>                                     | C <sub>39</sub> H <sub>50</sub> Br <sub>3</sub> Cl <sub>3</sub> Dy F <sub>12</sub> O <sub>10</sub> |
| Mr                                  | 1508.25                                                                                                                                | 1508.28                                                                                            |
| D <sub>x</sub> , g cm <sup>-3</sup> | 1.794                                                                                                                                  | 1.794                                                                                              |
| Z                                   | 2                                                                                                                                      | 2                                                                                                  |
| Mu (mm <sup>-1</sup> )              | 3.802                                                                                                                                  | 3.802                                                                                              |
| F <sub>000</sub>                    | 1478.0                                                                                                                                 | 1478.0                                                                                             |
| F <sub>000</sub> '                  | 1478.28                                                                                                                                |                                                                                                    |
| h,k,l <sub>max</sub>                | 16,17,19                                                                                                                               | 16,17,19                                                                                           |
| N <sub>ref</sub>                    | 10735                                                                                                                                  | 10468                                                                                              |
| T <sub>min</sub> ,T <sub>max</sub>  | 0.701,0.927                                                                                                                            | 0.596,0.912                                                                                        |
| T <sub>min</sub> '                  | 0.481                                                                                                                                  |                                                                                                    |

Correction method= # Reported T Limits: T<sub>min</sub>=0.596 T<sub>max</sub>=0.912 AbsCorr = MULTI-

SCAN

Data completeness= 0.975

R(reflections)= 0.0597( 7266)

S = 1.097

Theta(max)= 25.798

wR2(reflections)= 0.1435( 10468)

Npar= 660

---

The following ALERTS were generated. Each ALERT has the format

**test-name\_ALERT\_alert-type\_alert-level.**

Click on the hyperlinks for more details of the test.

---

● **Alert level C**

PLAT213\_ALERT\_2\_C Atom C36 has ADP max/min Ratio ..... 3.2 prolat  
PLAT222\_ALERT\_3\_C NonSolvent Resd 1 H Uiso(max)/Uiso(min) Range 7.9 Ratio  
PLAT242\_ALERT\_2\_C Low 'MainMol' Ueq as Compared to Neighbors of C34 Check  
PLAT245\_ALERT\_2\_C U(iso) H2O Smaller than U(eq) O10 by 0.020 Ang\*\*2  
  
PLAT334\_ALERT\_2\_C Small Aver. Benzene C-C Dist C2 -C7 1.37 Ang.  
  
PLAT342\_ALERT\_3\_C Low Bond Precision on C-C Bonds ..... 0.01494 Ang.  
PLAT434\_ALERT\_2\_C Short Inter HL..HL Contact F3 ..F3 2.58 Ang.  
2-x,2-y,2-z = 2\_777 Check  
  
PLAT906\_ALERT\_3\_C Large K Value in the Analysis of Variance ..... 2.541 Check  
PLAT911\_ALERT\_3\_C Missing FCF Refl Between Thmin & STh/L= 0.600 46 Report  
PLAT918\_ALERT\_3\_C Reflection(s) with I(obs) much Smaller I(calc) . 2 Check  
PLAT934\_ALERT\_3\_C Number of (Iobs-Icalc)/Sigma(W) > 10 Outliers .. 1 Check  
PLAT972\_ALERT\_2\_C Check Calcd Resid. Dens. 0.72A From Dy1 -1.68 eA-3  
PLAT972\_ALERT\_2\_C Check Calcd Resid. Dens. 1.10A From Dy1 -1.60 eA-3

---

● **Alert level G**

PLAT083\_ALERT\_2\_G SHELXL Second Parameter in WGHT Unusually Large 30.14 Why ?  
PLAT175\_ALERT\_4\_G The CIF-Embedded .res File Contains SAME Records 1 Report  
PLAT432\_ALERT\_2\_G Short Inter X...Y Contact F2 ..C17 2.93 Ang.  
2-x,1-y,1-z = 2\_766 Check  
PLAT434\_ALERT\_2\_G Short Inter HL..HL Contact Br3 ..F7 3.12 Ang.  
-x,-y,-z = 2\_555 Check  
PLAT794\_ALERT\_5\_G Tentative Bond Valency for Dy1 (III) . 3.20 Info  
PLAT883\_ALERT\_1\_G No Info/Value for \_atom\_sites\_solution\_primary . Please Do !  
PLAT912\_ALERT\_4\_G Missing # of FCF Reflections Above STh/L= 0.600 222 Note  
PLAT941\_ALERT\_3\_G Average HKL Measurement Multiplicity ..... 1.8 Low  
PLAT978\_ALERT\_2\_G Number C-C Bonds with Positive Residual Density. 0 Info

## 2.14 Complex 32

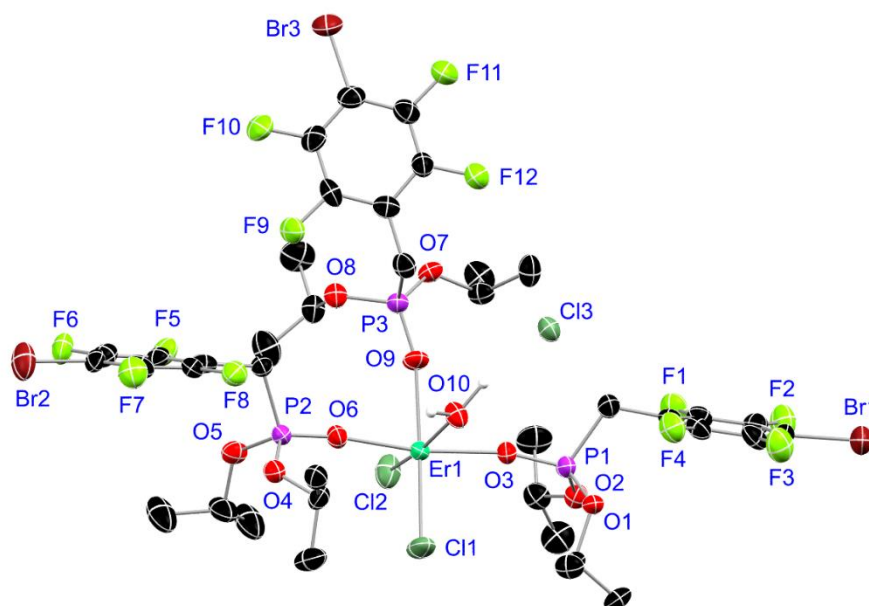

Figure 53: Asymmetric unit of **32**.

**32** crystallizes as  $C_{39}H_{50}Br_3Cl_2ErF_{12}O_{10}P_3 \cdot Cl^-$  in the space group  $P\bar{1}$  and contains one molecule in the asymmetric unit. A  $H_2O$  ligand replaces one of the chloride anions causing the formation of a partially solvent separated ion pair. O5 and C24, C25 and C26 are refined with restraints for the anisotropic displacement parameters to stabilize the refinement. A high residual electron density located close to the heavy Erbium ion can be expected due to minor crystal quality, therefore causing a B-Alert upon cif-file check.

Bond lengths [Å] and angles [°] of **32**

|            |           |             |           |
|------------|-----------|-------------|-----------|
| C(1)–C(2)  | 1.350(13) | C(8)–C(10)  | 1.496(12) |
| C(1)–C(6)  | 1.371(13) | C(8)–O(1)   | 1.455(11) |
| C(1)–F(1)  | 1.326(10) | C(11)–C(12) | 1.480(14) |
| C(2)–C(3)  | 1.362(14) | C(11)–C(13) | 1.463(15) |
| C(2)–F(2)  | 1.316(11) | C(11)–O(2)  | 1.459(11) |
| C(3)–C(4)  | 1.364(15) | C(14)–C(15) | 1.364(14) |
| C(3)–Br(1) | 1.856(10) | C(14)–C(19) | 1.373(13) |
| C(4)–C(5)  | 1.351(14) | C(14)–F(5)  | 1.331(10) |
| C(4)–F(3)  | 1.330(11) | C(15)–C(16) | 1.348(13) |
| C(5)–C(6)  | 1.367(13) | C(15)–F(6)  | 1.331(11) |
| C(5)–F(4)  | 1.322(10) | C(16)–C(17) | 1.365(13) |
| C(6)–C(7)  | 1.485(13) | C(16)–Br(2) | 1.844(9)  |
| C(7)–P(1)  | 1.782(10) | C(17)–C(18) | 1.361(14) |
| C(8)–C(9)  | 1.491(12) | C(17)–F(7)  | 1.331(11) |

|             |           |                   |           |
|-------------|-----------|-------------------|-----------|
| C(18)–C(19) | 1.361(13) | O(5)–P(2)         | 1.534(6)  |
| C(18)–F(8)  | 1.345(10) | O(6)–P(2)         | 1.452(6)  |
| C(19)–C(20) | 1.483(13) | O(7)–P(3)         | 1.542(6)  |
| C(20)–P(2)  | 1.757(8)  | O(8)–P(3)         | 1.540(6)  |
| C(21)–C(22) | 1.490(14) | O(9)–P(3)         | 1.445(6)  |
| C(21)–C(23) | 1.462(13) |                   |           |
| C(21)–O(4)  | 1.458(10) | C(2)–C(1)–C(6)    | 121.4(8)  |
| C(24)–C(25) | 1.380(17) | F(1)–C(1)–C(2)    | 118.2(9)  |
| C(24)–C(26) | 1.484(17) | F(1)–C(1)–C(6)    | 120.4(9)  |
| C(24)–O(5)  | 1.455(12) | C(1)–C(2)–C(3)    | 121.1(9)  |
| C(27)–C(28) | 1.376(14) | F(2)–C(2)–C(1)    | 119.6(9)  |
| C(27)–C(32) | 1.372(13) | F(2)–C(2)–C(3)    | 119.3(9)  |
| C(27)–F(9)  | 1.318(11) | C(2)–C(3)–C(4)    | 118.1(9)  |
| C(28)–C(29) | 1.362(15) | C(2)–C(3)–Br(1)   | 121.9(8)  |
| C(28)–F(10) | 1.321(11) | C(4)–C(3)–Br(1)   | 119.8(8)  |
| C(29)–C(30) | 1.367(14) | C(5)–C(4)–C(3)    | 120.7(9)  |
| C(29)–Br(3) | 1.843(10) | F(3)–C(4)–C(3)    | 121.5(9)  |
| C(30)–C(31) | 1.342(14) | F(3)–C(4)–C(5)    | 117.8(9)  |
| C(30)–F(11) | 1.333(12) | C(4)–C(5)–C(6)    | 121.8(9)  |
| C(31)–C(32) | 1.353(13) | F(4)–C(5)–C(4)    | 118.7(9)  |
| C(31)–F(12) | 1.336(11) | F(4)–C(5)–C(6)    | 119.4(9)  |
| C(32)–C(33) | 1.471(13) | C(1)–C(6)–C(7)    | 121.7(8)  |
| C(33)–P(3)  | 1.775(9)  | C(5)–C(6)–C(1)    | 116.9(9)  |
| C(34)–C(35) | 1.474(14) | C(5)–C(6)–C(7)    | 121.4(9)  |
| C(34)–C(36) | 1.493(13) | C(6)–C(7)–P(1)    | 114.4(7)  |
| C(34)–O(7)  | 1.443(11) | C(9)–C(8)–C(10)   | 113.1(8)  |
| C(37)–C(38) | 1.474(14) | O(1)–C(8)–C(9)    | 106.5(8)  |
| C(37)–C(39) | 1.475(15) | O(1)–C(8)–C(10)   | 106.0(7)  |
| C(37)–O(8)  | 1.463(10) | C(13)–C(11)–C(12) | 111.5(10) |
| Cl(1)–Er(1) | 2.512(2)  | O(2)–C(11)–C(12)  | 110.5(9)  |
| Cl(2)–Er(1) | 2.530(2)  | O(2)–C(11)–C(13)  | 106.2(9)  |
| Er(1)–O(3)  | 2.192(6)  | C(15)–C(14)–C(19) | 122.6(9)  |
| Er(1)–O(6)  | 2.212(6)  | F(5)–C(14)–C(15)  | 117.8(8)  |
| Er(1)–O(9)  | 2.224(6)  | F(5)–C(14)–C(19)  | 119.6(8)  |
| Er(1)–O(10) | 2.286(6)  | C(16)–C(15)–C(14) | 120.7(9)  |
| O(1)–P(1)   | 1.533(6)  | F(6)–C(15)–C(14)  | 118.7(9)  |
| O(2)–P(1)   | 1.537(7)  | F(6)–C(15)–C(16)  | 120.6(9)  |
| O(3)–P(1)   | 1.473(6)  | C(15)–C(16)–C(17) | 118.3(9)  |
| O(4)–P(2)   | 1.535(6)  | C(15)–C(16)–Br(2) | 121.7(7)  |

|                   |           |                   |            |
|-------------------|-----------|-------------------|------------|
| C(17)–C(16)–Br(2) | 119.9(7)  | C(38)–C(37)–C(39) | 114.6(10)  |
| C(18)–C(17)–C(16) | 119.9(9)  | O(8)–C(37)–C(38)  | 107.3(8)   |
| F(7)–C(17)–C(16)  | 121.3(9)  | O(8)–C(37)–C(39)  | 106.9(8)   |
| F(7)–C(17)–C(18)  | 118.7(9)  | Cl(1)–Er(1)–Cl(2) | 100.36(10) |
| C(17)–C(18)–C(19) | 123.5(9)  | O(3)–Er(1)–Cl(1)  | 95.13(17)  |
| F(8)–C(18)–C(17)  | 116.9(8)  | O(3)–Er(1)–Cl(2)  | 89.57(17)  |
| F(8)–C(18)–C(19)  | 119.7(8)  | O(3)–Er(1)–O(6)   | 169.6(2)   |
| C(14)–C(19)–C(20) | 122.8(8)  | O(3)–Er(1)–O(9)   | 89.4(2)    |
| C(18)–C(19)–C(14) | 114.9(9)  | O(3)–Er(1)–O(10)  | 84.6(2)    |
| C(18)–C(19)–C(20) | 122.3(8)  | O(6)–Er(1)–Cl(1)  | 89.57(17)  |
| C(19)–C(20)–P(2)  | 112.0(6)  | O(6)–Er(1)–Cl(2)  | 98.68(16)  |
| C(23)–C(21)–C(22) | 112.4(8)  | O(6)–Er(1)–O(9)   | 84.7(2)    |
| O(4)–C(21)–C(22)  | 107.5(8)  | O(6)–Er(1)–O(10)  | 86.1(2)    |
| O(4)–C(21)–C(23)  | 108.0(7)  | O(9)–Er(1)–Cl(1)  | 170.56(18) |
| C(25)–C(24)–C(26) | 114.9(12) | O(9)–Er(1)–Cl(2)  | 87.95(18)  |
| C(25)–C(24)–O(5)  | 111.6(10) | O(9)–Er(1)–O(10)  | 81.0(2)    |
| O(5)–C(24)–C(26)  | 105.2(9)  | O(10)–Er(1)–Cl(1) | 91.19(18)  |
| C(32)–C(27)–C(28) | 120.8(9)  | O(10)–Er(1)–Cl(2) | 167.48(17) |
| F(9)–C(27)–C(28)  | 117.9(9)  | C(8)–O(1)–P(1)    | 122.9(6)   |
| F(9)–C(27)–C(32)  | 121.3(9)  | C(11)–O(2)–P(1)   | 124.5(6)   |
| C(29)–C(28)–C(27) | 121.7(9)  | P(1)–O(3)–Er(1)   | 164.8(4)   |
| F(10)–C(28)–C(27) | 118.1(9)  | C(21)–O(4)–P(2)   | 126.5(6)   |
| F(10)–C(28)–C(29) | 120.2(9)  | C(24)–O(5)–P(2)   | 125.3(7)   |
| C(28)–C(29)–C(30) | 116.8(9)  | P(2)–O(6)–Er(1)   | 172.9(4)   |
| C(28)–C(29)–Br(3) | 120.7(8)  | C(34)–O(7)–P(3)   | 123.6(5)   |
| C(30)–C(29)–Br(3) | 122.5(8)  | C(37)–O(8)–P(3)   | 122.4(6)   |
| C(31)–C(30)–C(29) | 121.0(10) | P(3)–O(9)–Er(1)   | 162.9(4)   |
| F(11)–C(30)–C(29) | 119.3(9)  | O(1)–P(1)–C(7)    | 101.5(4)   |
| F(11)–C(30)–C(31) | 119.7(9)  | O(1)–P(1)–O(2)    | 105.6(3)   |
| C(30)–C(31)–C(32) | 123.6(9)  | O(2)–P(1)–C(7)    | 109.0(4)   |
| F(12)–C(31)–C(30) | 117.6(9)  | O(3)–P(1)–C(7)    | 110.8(4)   |
| F(12)–C(31)–C(32) | 118.8(9)  | O(3)–P(1)–O(1)    | 115.8(4)   |
| C(27)–C(32)–C(33) | 120.8(9)  | O(3)–P(1)–O(2)    | 113.4(4)   |
| C(31)–C(32)–C(27) | 116.2(9)  | O(4)–P(2)–C(20)   | 108.1(4)   |
| C(31)–C(32)–C(33) | 123.0(9)  | O(5)–P(2)–C(20)   | 102.4(4)   |
| C(32)–C(33)–P(3)  | 111.7(6)  | O(5)–P(2)–O(4)    | 105.5(4)   |
| C(35)–C(34)–C(36) | 114.4(9)  | O(6)–P(2)–C(20)   | 111.8(4)   |
| O(7)–C(34)–C(35)  | 109.0(8)  | O(6)–P(2)–O(4)    | 113.4(3)   |
| O(7)–C(34)–C(36)  | 106.0(8)  | O(6)–P(2)–O(5)    | 114.8(4)   |

|                 |          |                 |          |
|-----------------|----------|-----------------|----------|
| O(7)–P(3)–C(33) | 108.9(4) | O(9)–P(3)–C(33) | 112.9(4) |
| O(8)–P(3)–C(33) | 102.9(4) | O(9)–P(3)–O(7)  | 111.1(4) |
| O(8)–P(3)–O(7)  | 105.7(3) | O(9)–P(3)–O(8)  | 114.7(4) |

## checkCIF/PLATON report

Structure factors have been supplied for datablock(s) i3071

THIS REPORT IS FOR GUIDANCE ONLY. IF USED AS PART OF A REVIEW PROCEDURE FOR PUBLICATION, IT SHOULD NOT REPLACE THE EXPERTISE OF AN EXPERIENCED CRYSTALLOGRAPHIC REFEREE.

No syntax errors found. CIF dictionary Interpreting this report

### Datablock: i3071

---

|                 |                                                      |                    |                  |
|-----------------|------------------------------------------------------|--------------------|------------------|
| Bond precision: | C-C = 0.0158 Å                                       | Wavelength=0.71073 |                  |
| Cell:           | a=13.3443(19)                                        | b=14.464(2)        | c=16.184(2)      |
|                 | alpha=111.069(10)                                    | beta=110.094(11)   | gamma=91.110(12) |
| Temperature:    | 100K                                                 |                    |                  |
|                 | <i>Calculated</i>                                    | <i>Reported</i>    |                  |
| Volume          | 2700.8(7)                                            | 2700.8(7)          |                  |
| Space group     | P -1                                                 | P -1               |                  |
| Hall group      | -P 1                                                 | -P 1               |                  |
| Moiety formula  | C39 H50 Br3 Cl2 Er F12 O10 C39 H50 Br3 Cl2 Er F12O10 |                    |                  |
|                 | P3, Cl                                               | P3, Cl             |                  |
| Sum formula     | C39 H50 Br3 Cl3 Er F12 O10 C39 H50 Br3 Cl3 Er F12O10 |                    |                  |
|                 | P3                                                   | P3                 |                  |
| Mr              | 1513.01                                              | 1513.04            |                  |
| Dx, g cm-3      | 1.860                                                | 1.861              |                  |
| Z               | 2                                                    | 2                  |                  |
| Mu (mm-1)       | 4.102                                                | 4.102              |                  |
| F000            | 1482.0                                               | 1482.0             |                  |
| F000'           | 1482.16                                              |                    |                  |
| h,k,lmax        | 16,17,19                                             | 16,17,19           |                  |

|           |             |             |
|-----------|-------------|-------------|
| Nref      | 10420       | 10143       |
| Tmin,Tmax | 0.681,0.782 | 0.336,0.801 |
| Tmin'     | 0.631       |             |

Correction method= # Reported T Limits: Tmin=0.336 Tmax=0.801 AbsCorr = MULTI-SCAN

Data completeness= 0.973

Theta(max)= 25.829

R(reflections)= 0.0594( 7205)

wR2(reflections)= 0.1681( 10143)

S = 1.121

Npar= 653

The following ALERTS were generated. Each ALERT has the format *test-name\_ALERT\_alert-type\_alert-level*.

Click on the hyperlinks for more details of the test.

 **Alert level B**

PLAT973\_ALERT\_2\_B Check Calcd Positive Resid. Density on Er1 1.80 eA-3

 **Alert level C**

PLAT334\_ALERT\_2\_C Small Aver. Benzene C-C Dist C1 -C6 1.36 Ang.  
 PLAT334\_ALERT\_2\_C Small Aver. Benzene C-C Dist C14 -C19 1.36 Ang.  
 PLAT334\_ALERT\_2\_C Small Aver. Benzene C-C Dist C27 -C32 1.36 Ang.  
 PLAT342\_ALERT\_3\_C Low Bond Precision on C-C Bonds ..... 0.01582 Ang.  
 PLAT360\_ALERT\_2\_C Short C(sp3)-C(sp3) Bond C24 - C25 . 1.38 Ang.  
 PLAT434\_ALERT\_2\_C Short Inter HL..HL Contact F3 ..F3 2.55 Ang.  
 -x,-y,-z = 2\_555 Check  
 PLAT906\_ALERT\_3\_C Large K Value in the Analysis of Variance ..... 2.036 Check  
 PLAT911\_ALERT\_3\_C Missing FCF Refl Between Thmin & STh/L= 0.600 53 Report  
 PLAT971\_ALERT\_2\_C Check Calcd Resid. Dens. 1.04A From Er1 2.24 eA-3  
 PLAT971\_ALERT\_2\_C Check Calcd Resid. Dens. 1.00A From Er1 2.17 eA-3  
 PLAT971\_ALERT\_2\_C Check Calcd Resid. Dens. 1.02A From Er1 2.13 eA-3  
 PLAT971\_ALERT\_2\_C Check Calcd Resid. Dens. 1.12A From Er1 2.10 eA-3  
 PLAT971\_ALERT\_2\_C Check Calcd Resid. Dens. 0.93A From Er1 1.92 eA-3  
 PLAT977\_ALERT\_2\_C Check Negative Difference Density on H12A -0.31 eA-3  
 PLAT977\_ALERT\_2\_C Check Negative Difference Density on H25C -0.42 eA-3  
 PLAT977\_ALERT\_2\_C Check Negative Difference Density on H26A -0.32 eA-3  
 PLAT977\_ALERT\_2\_C Check Negative Difference Density on H36A -0.33 eA-3

 **Alert level G**

PLAT003\_ALERT\_2\_G Number of Uiso or Uij Restrained non-H Atoms ... 4 Report  
 PLAT007\_ALERT\_5\_G Number of Unrefined Donor-H Atoms ..... 2 Report  
 PLAT083\_ALERT\_2\_G SHELXL Second Parameter in WGHT Unusually Large 13.76 Why ?  
 PLAT187\_ALERT\_4\_G The CIF-Embedded .res File Contains RIGU Records 1 Report  
 PLAT432\_ALERT\_2\_G Short Inter X...Y Contact F2 ..C30 2.91 Ang.  
 -x,1-y,1-z = 2\_566 Check  
 PLAT434\_ALERT\_2\_G Short Inter HL..HL Contact Br2 ..F10 3.07 Ang.



|                                                                    |                      |   |                          |
|--------------------------------------------------------------------|----------------------|---|--------------------------|
| PLAT434_ALERT_2_G Short Inter HL..HL Contact Br3                   | 2-x,2-y,2-z<br>..Cl2 | = | 2_777 Check<br>3.48 Ang. |
|                                                                    | x,1+y,z              | = | 1_565 Check              |
| PLAT794_ALERT_5_G Tentative Bond Valency for Er1 (III)             | .                    | . | 3.50 Info                |
| PLAT860_ALERT_3_G Number of Least-Squares Restraints .....         |                      |   | 18 Note                  |
| PLAT883_ALERT_1_G No Info/Value for _atom_sites_solution_primary . |                      |   | Please Do !              |
| PLAT912_ALERT_4_G Missing # of FCF Reflections Above STh/L= 0.600  |                      |   | 222 Note                 |
| PLAT933_ALERT_2_G Number of OMIT Records in Embedded .res File ... |                      |   | 11 Note                  |
| PLAT941_ALERT_3_G Average HKL Measurement Multiplicity .....       |                      |   | 1.8 Low                  |
| PLAT978_ALERT_2_G Number C-C Bonds with Positive Residual Density. |                      |   | 0 Info                   |

# 3 PHOTOLUMINESCENCE

## 3.1 Absorption Spectra

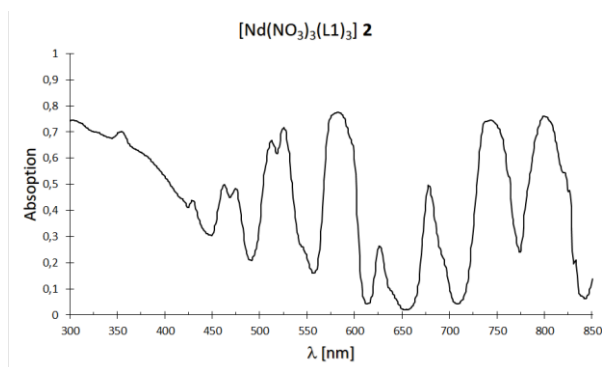

Figure 54: Absorption spectrum of complex **2**.

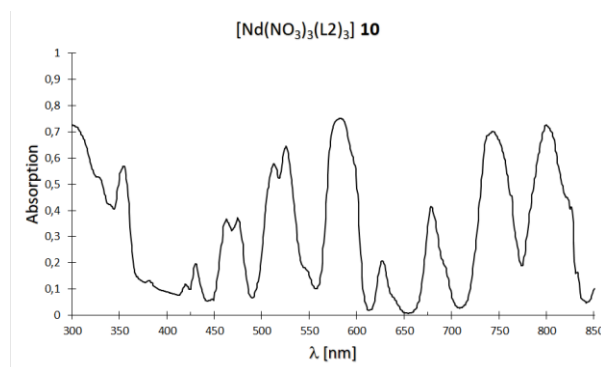

Figure 57: Absorption spectrum of complex **10**.

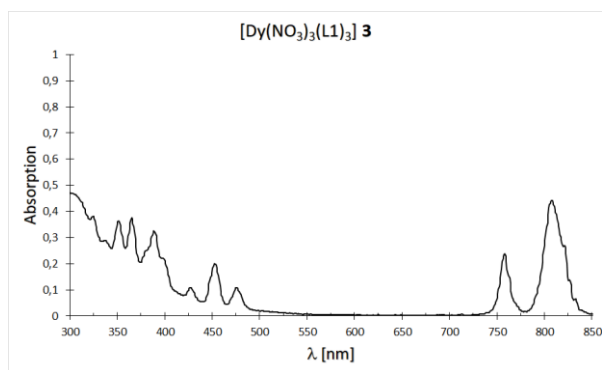

Figure 55: Absorption spectrum of complex **3**.

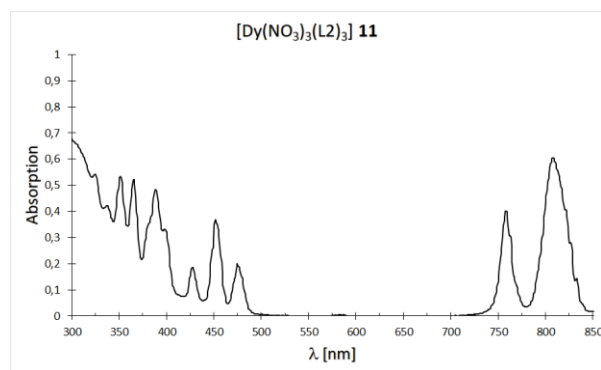

Figure 58: Absorption spectrum of complex **11**.

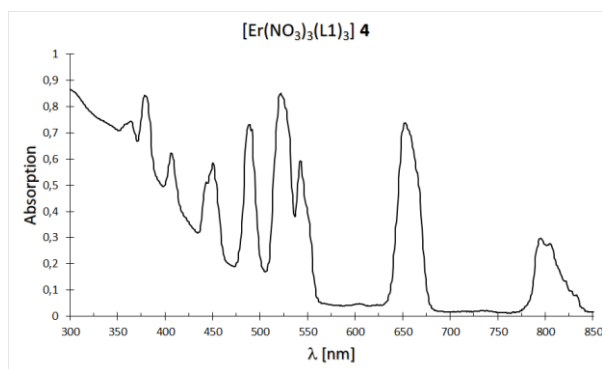

Figure 56: Absorption spectrum of complex **4**.

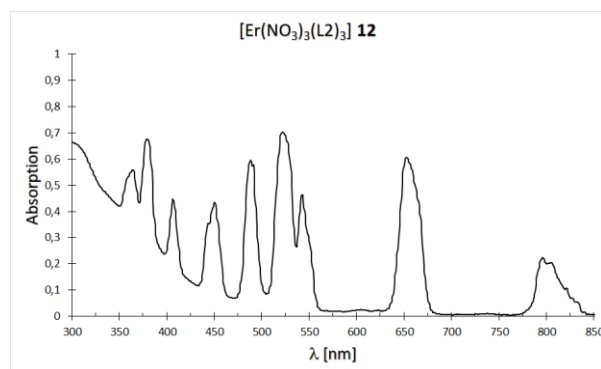

Figure 59: Absorption spectrum of complex **12**.

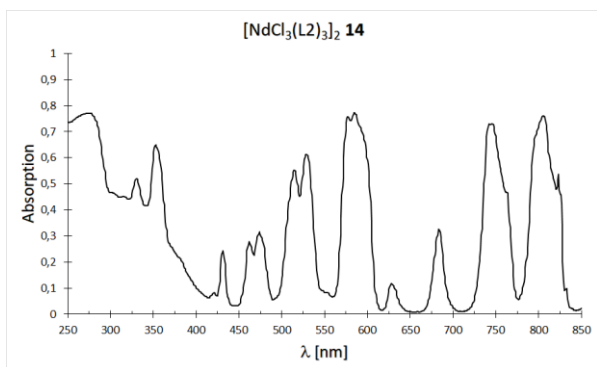

Figure 60: Absorption spectrum of complex **14**.

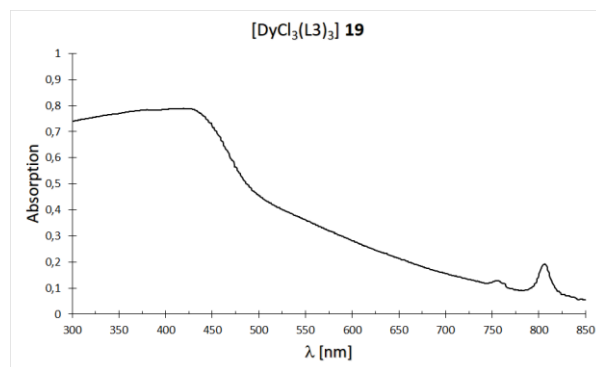

Figure 64: Absorption spectrum of complex **19**.

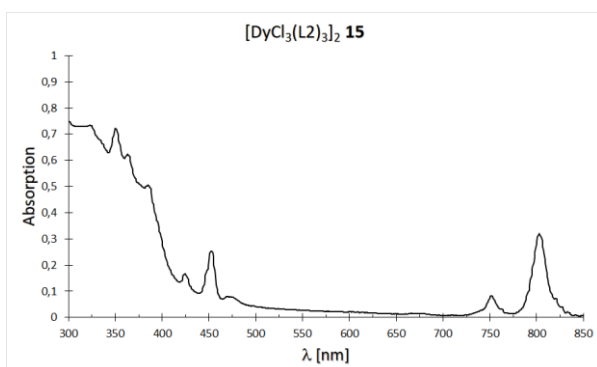

Figure 61: Absorption spectrum of complex **15**.

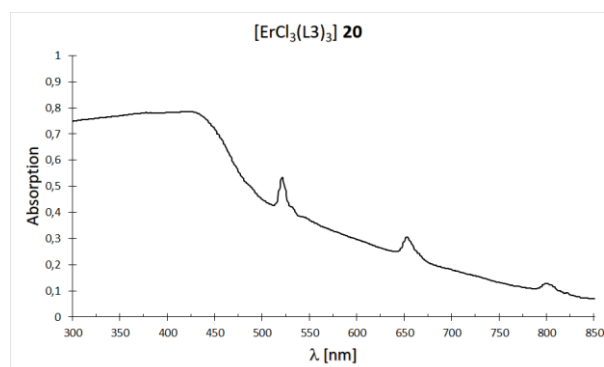

Figure 65: Absorption spectrum of complex **20**.

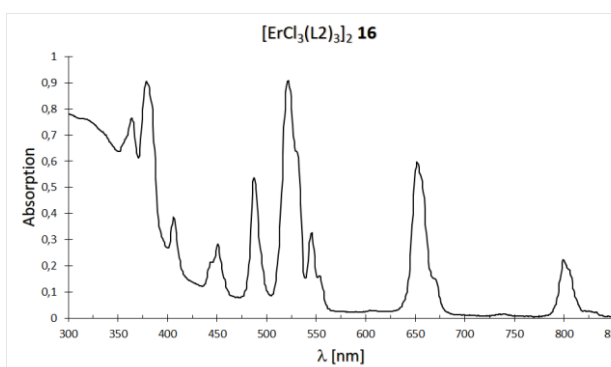

Figure 62: Absorption spectrum of complex **16**.

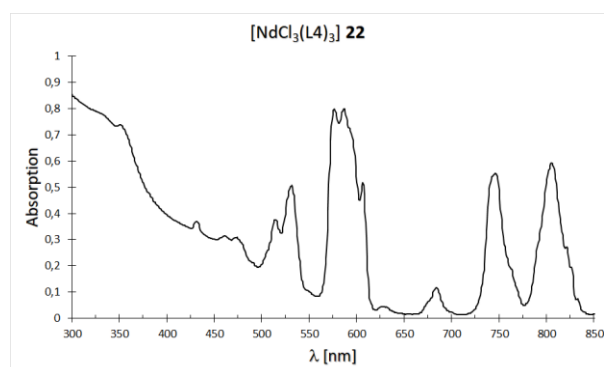

Figure 66: Absorption spectrum of complex **22**.

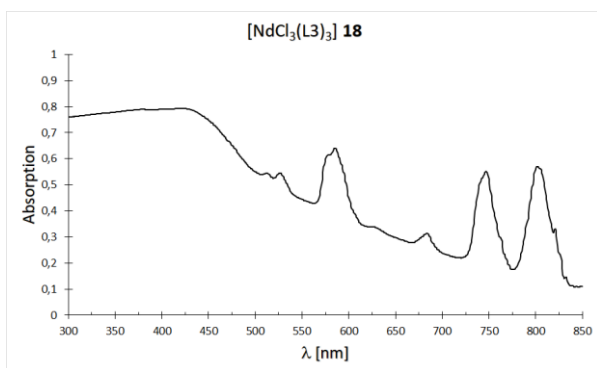

Figure 63: Absorption spectrum of complex **18**.

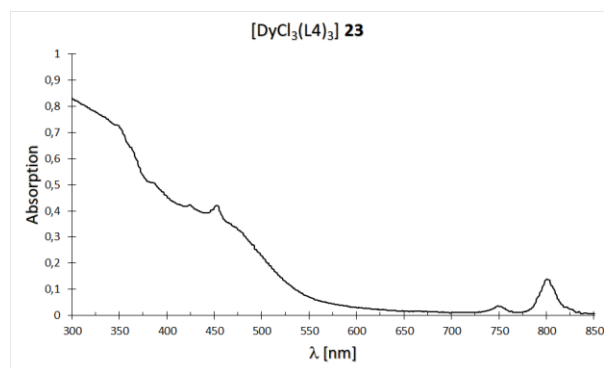

Figure 67: Absorption spectrum of complex **23**.

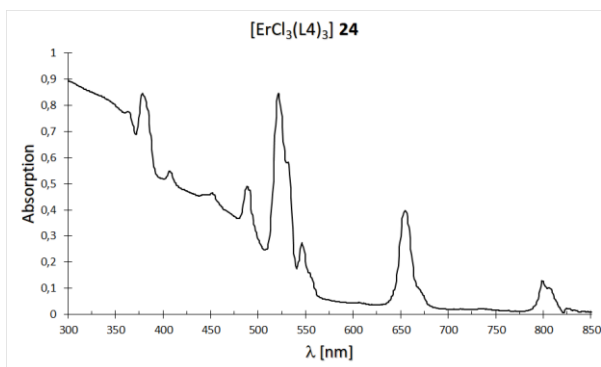

Figure 68: Absorption spectrum of complex **24**.

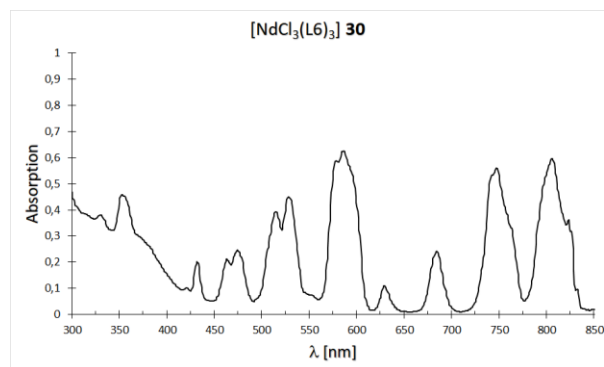

Figure 72: Absorption spectrum of complex **30**.

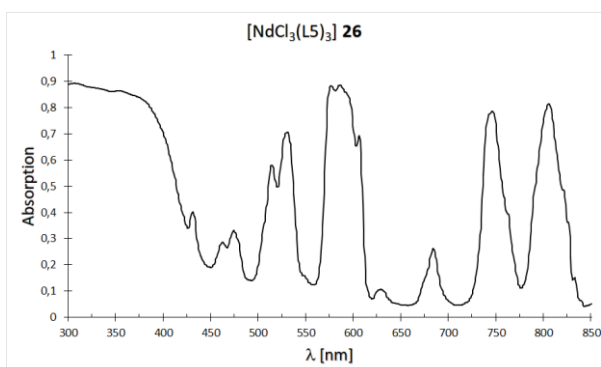

Figure 69: Absorption spectrum of complex **26**.

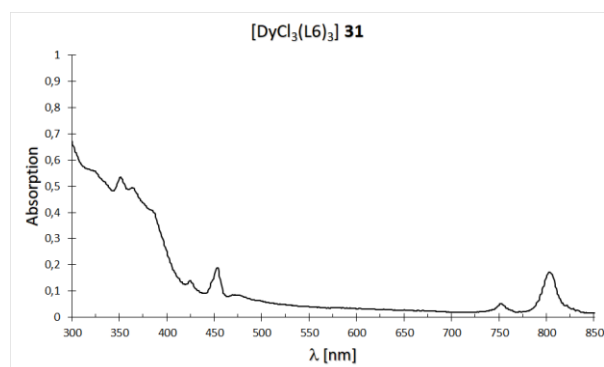

Figure 73: Absorption spectrum of complex **31**.

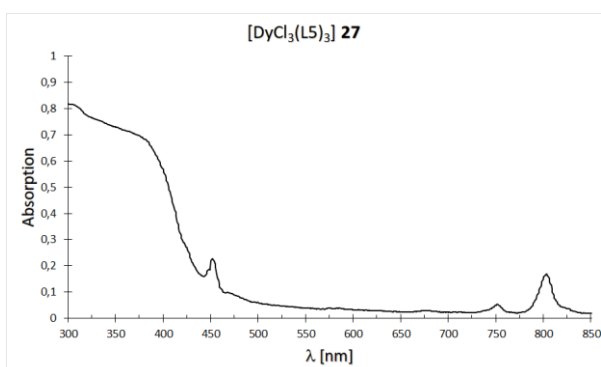

Figure 70: Absorption spectrum of complex **27**.

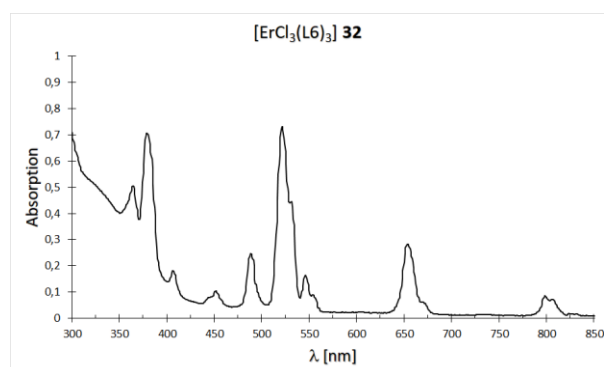

Figure 74: Absorption spectrum of complex **32**.

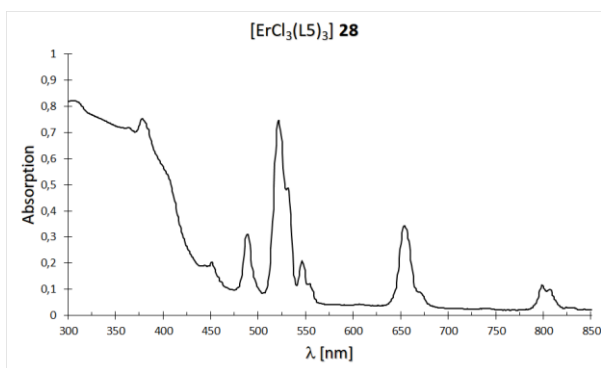

Figure 71: Absorption spectrum of complex **28**.

## 3.2 Emission Spectra

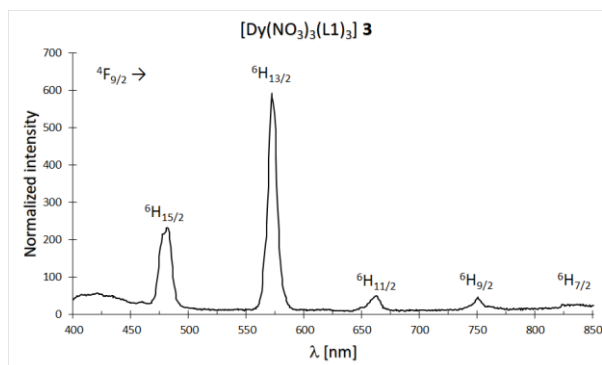

Figure 75: Emission spec. of complex **3** ( $\lambda_{\text{exc.}} = 366$  nm).

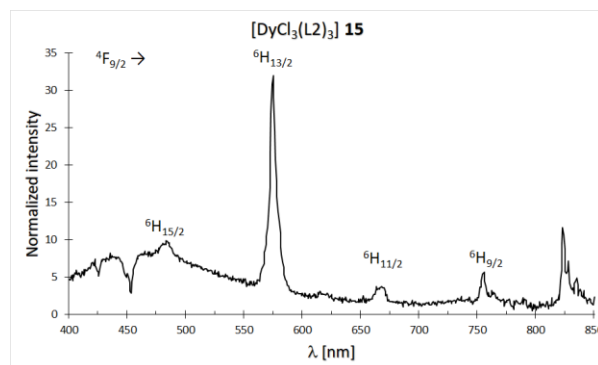

Figure 78: Emission spec. of complex **15** ( $\lambda_{\text{exc.}} = 366$  nm).

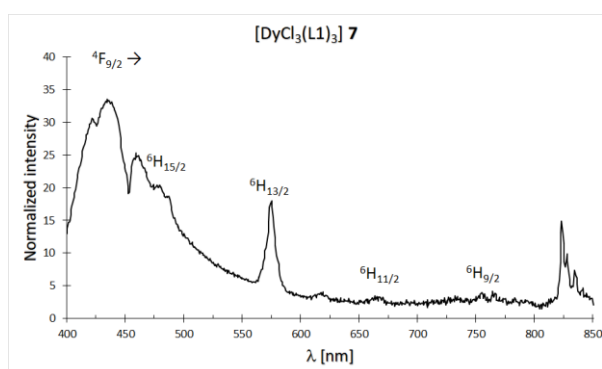

Figure 76: Emission spec. of complex **7** ( $\lambda_{\text{exc.}} = 366$  nm).

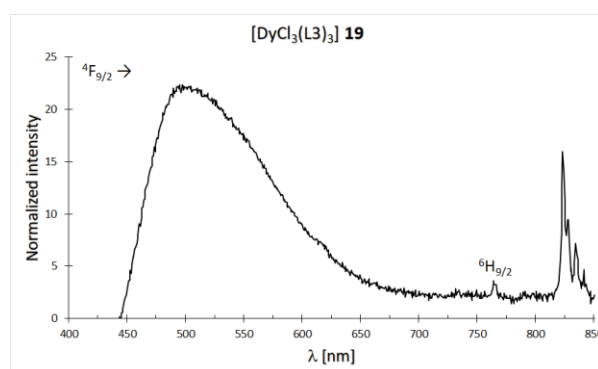

Figure 79: Emission spec. of complex **19** ( $\lambda_{\text{exc.}} = 366$  nm).

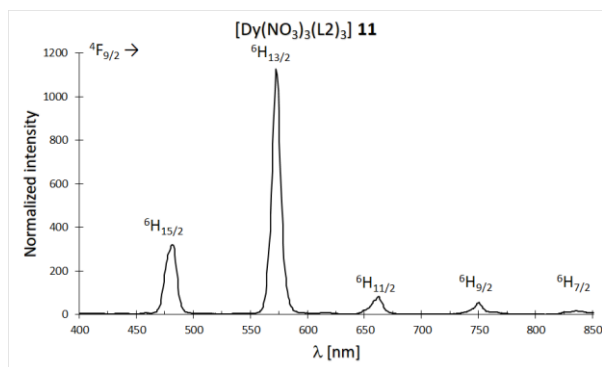

Figure 77: Emission spec. of complex **11** ( $\lambda_{\text{exc.}} = 366$  nm).

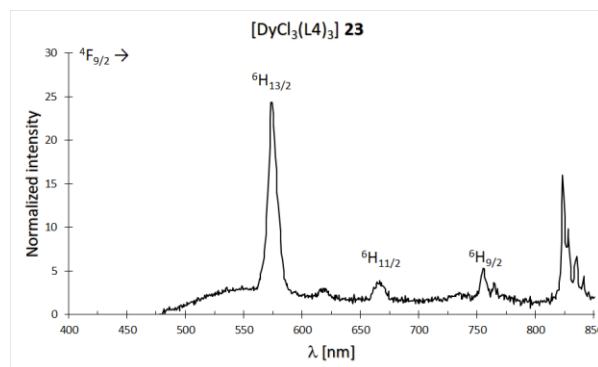

Figure 80: Emission spec. of complex **23** ( $\lambda_{\text{exc.}} = 366$  nm).

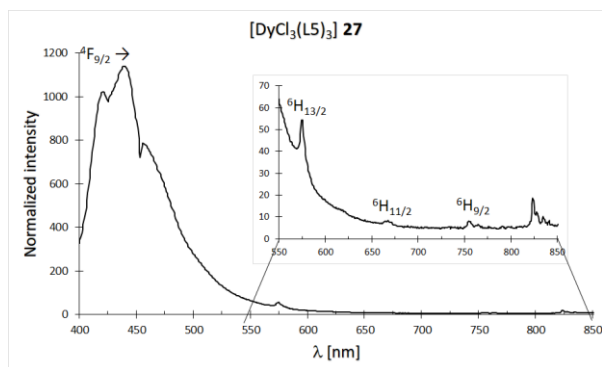

Figure 81: Emission spec. of complex **27** ( $\lambda_{\text{exc.}} = 366$  nm).

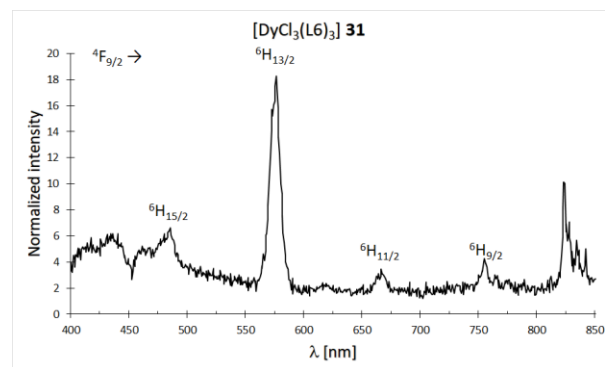

Figure 82: Emission spec. of complex **31** ( $\lambda_{\text{exc.}} = 366$  nm).

## 4 REFERENCES

1. G. R. Fulmer, A. J. M. Miller, N. H. Sherden, H. E. Gottlieb, A. Nudelman, B. M. Stoltz, J. E. Bercaw and K. I. Goldberg, *Organometallics*, 2010, **29**, 2176-2179.
2. J. H. Clements and S. E. Webber, *J. Phys. Chem. B*, 1999, **103**, 9366-9377.
3. B. Moreau, P.-A. Jaffrès and D. Villemin, *Org. Prep. Proced. Int.*, 2002, **34**, 549-552.
4. F. Leroux, T. U. Hutschenreuter, C. Charrière, R. Scopelliti and R. W. Hartmann, *Helv. Chim. Acta*, 2003, **86**, 2671-2686.
5. H. Sato, J. A. Bender, S. T. Roberts and M. J. Krische, *J. Am. Chem. Soc.*, 2018, **140**, 2455-2459.
6. A. Franzke and A. Pfaltz, *Synthesis*, 2008, **2008**, 245-252.
